# Supplementary material for: Rapid evolution of piRNA clusters in the Drosophila melanogaster ovary
Source: HighWire-hosted journal article supplement (doi:10.1101/gr.278062.123), 2024-05-01
Supplement: Supplemental_Material.zip [file Supplemental_Fig_S1.pdf › Supplemental_Fig_S1.pdf]

## Supplementary Fig. 1

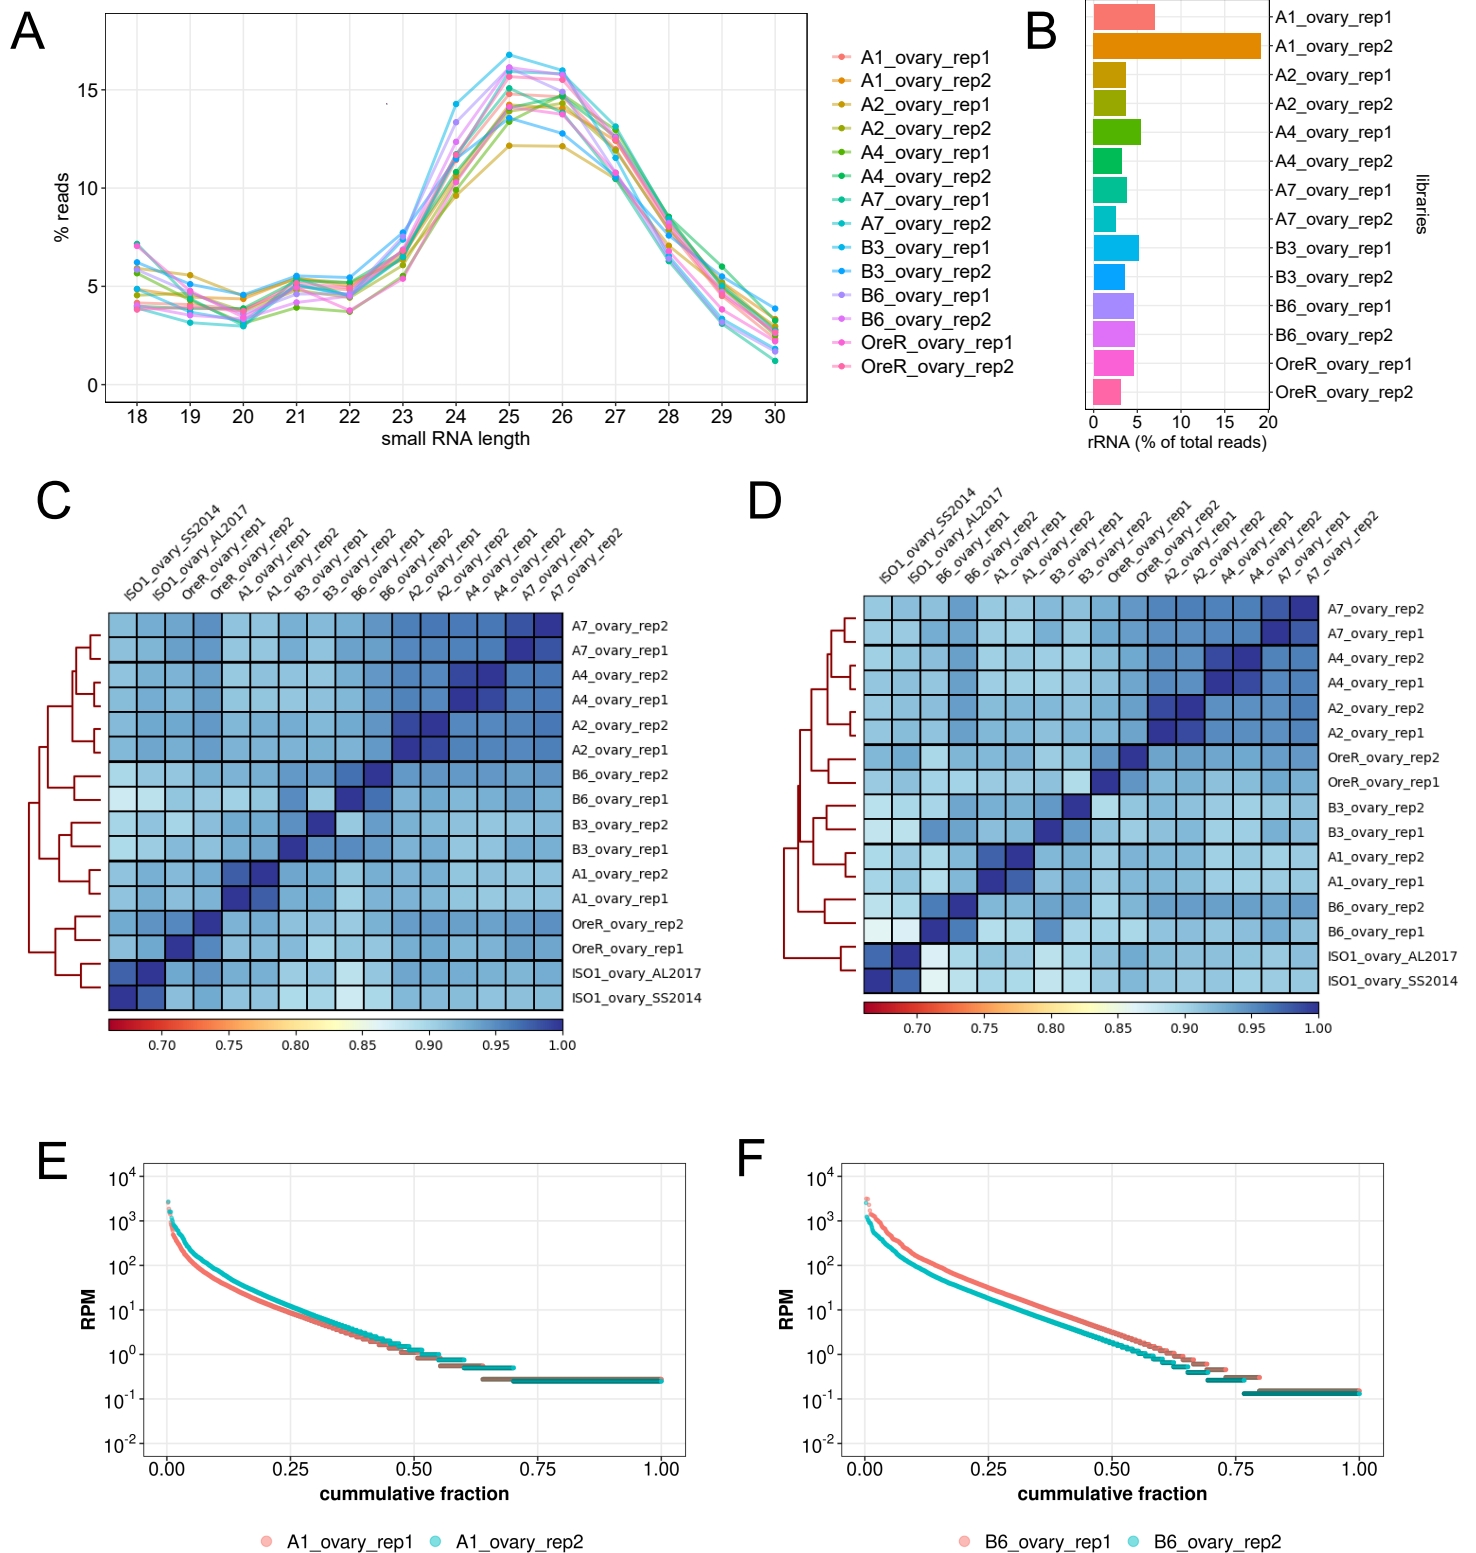

**Supplementary\_Fig\_S1. Small RNA library QC results.** (A) Small RNA read length profile after processing and removal of miRNA, tRNA, rRNA and snoRNAs. (B) Percentage of rRNA derived reads in small RNA libraries. (C&D) Spearman correlation plot of TE-derived small RNA expression in libraries using unique and multi mapping approaches respectively. (E&F) Comparison of cumulative sequence distribution of piRNAs in libraries to evaluate saturation of sequence space.
