# Supplementary material for: Rapid evolution of piRNA clusters in the Drosophila melanogaster ovary
Source: HighWire-hosted journal article supplement (doi:10.1101/gr.278062.123), 2024-05-01
Supplement: Supplemental_Material.zip [file Supplemental_Fig_S2.pdf › Supplemental_Fig_S2.pdf]

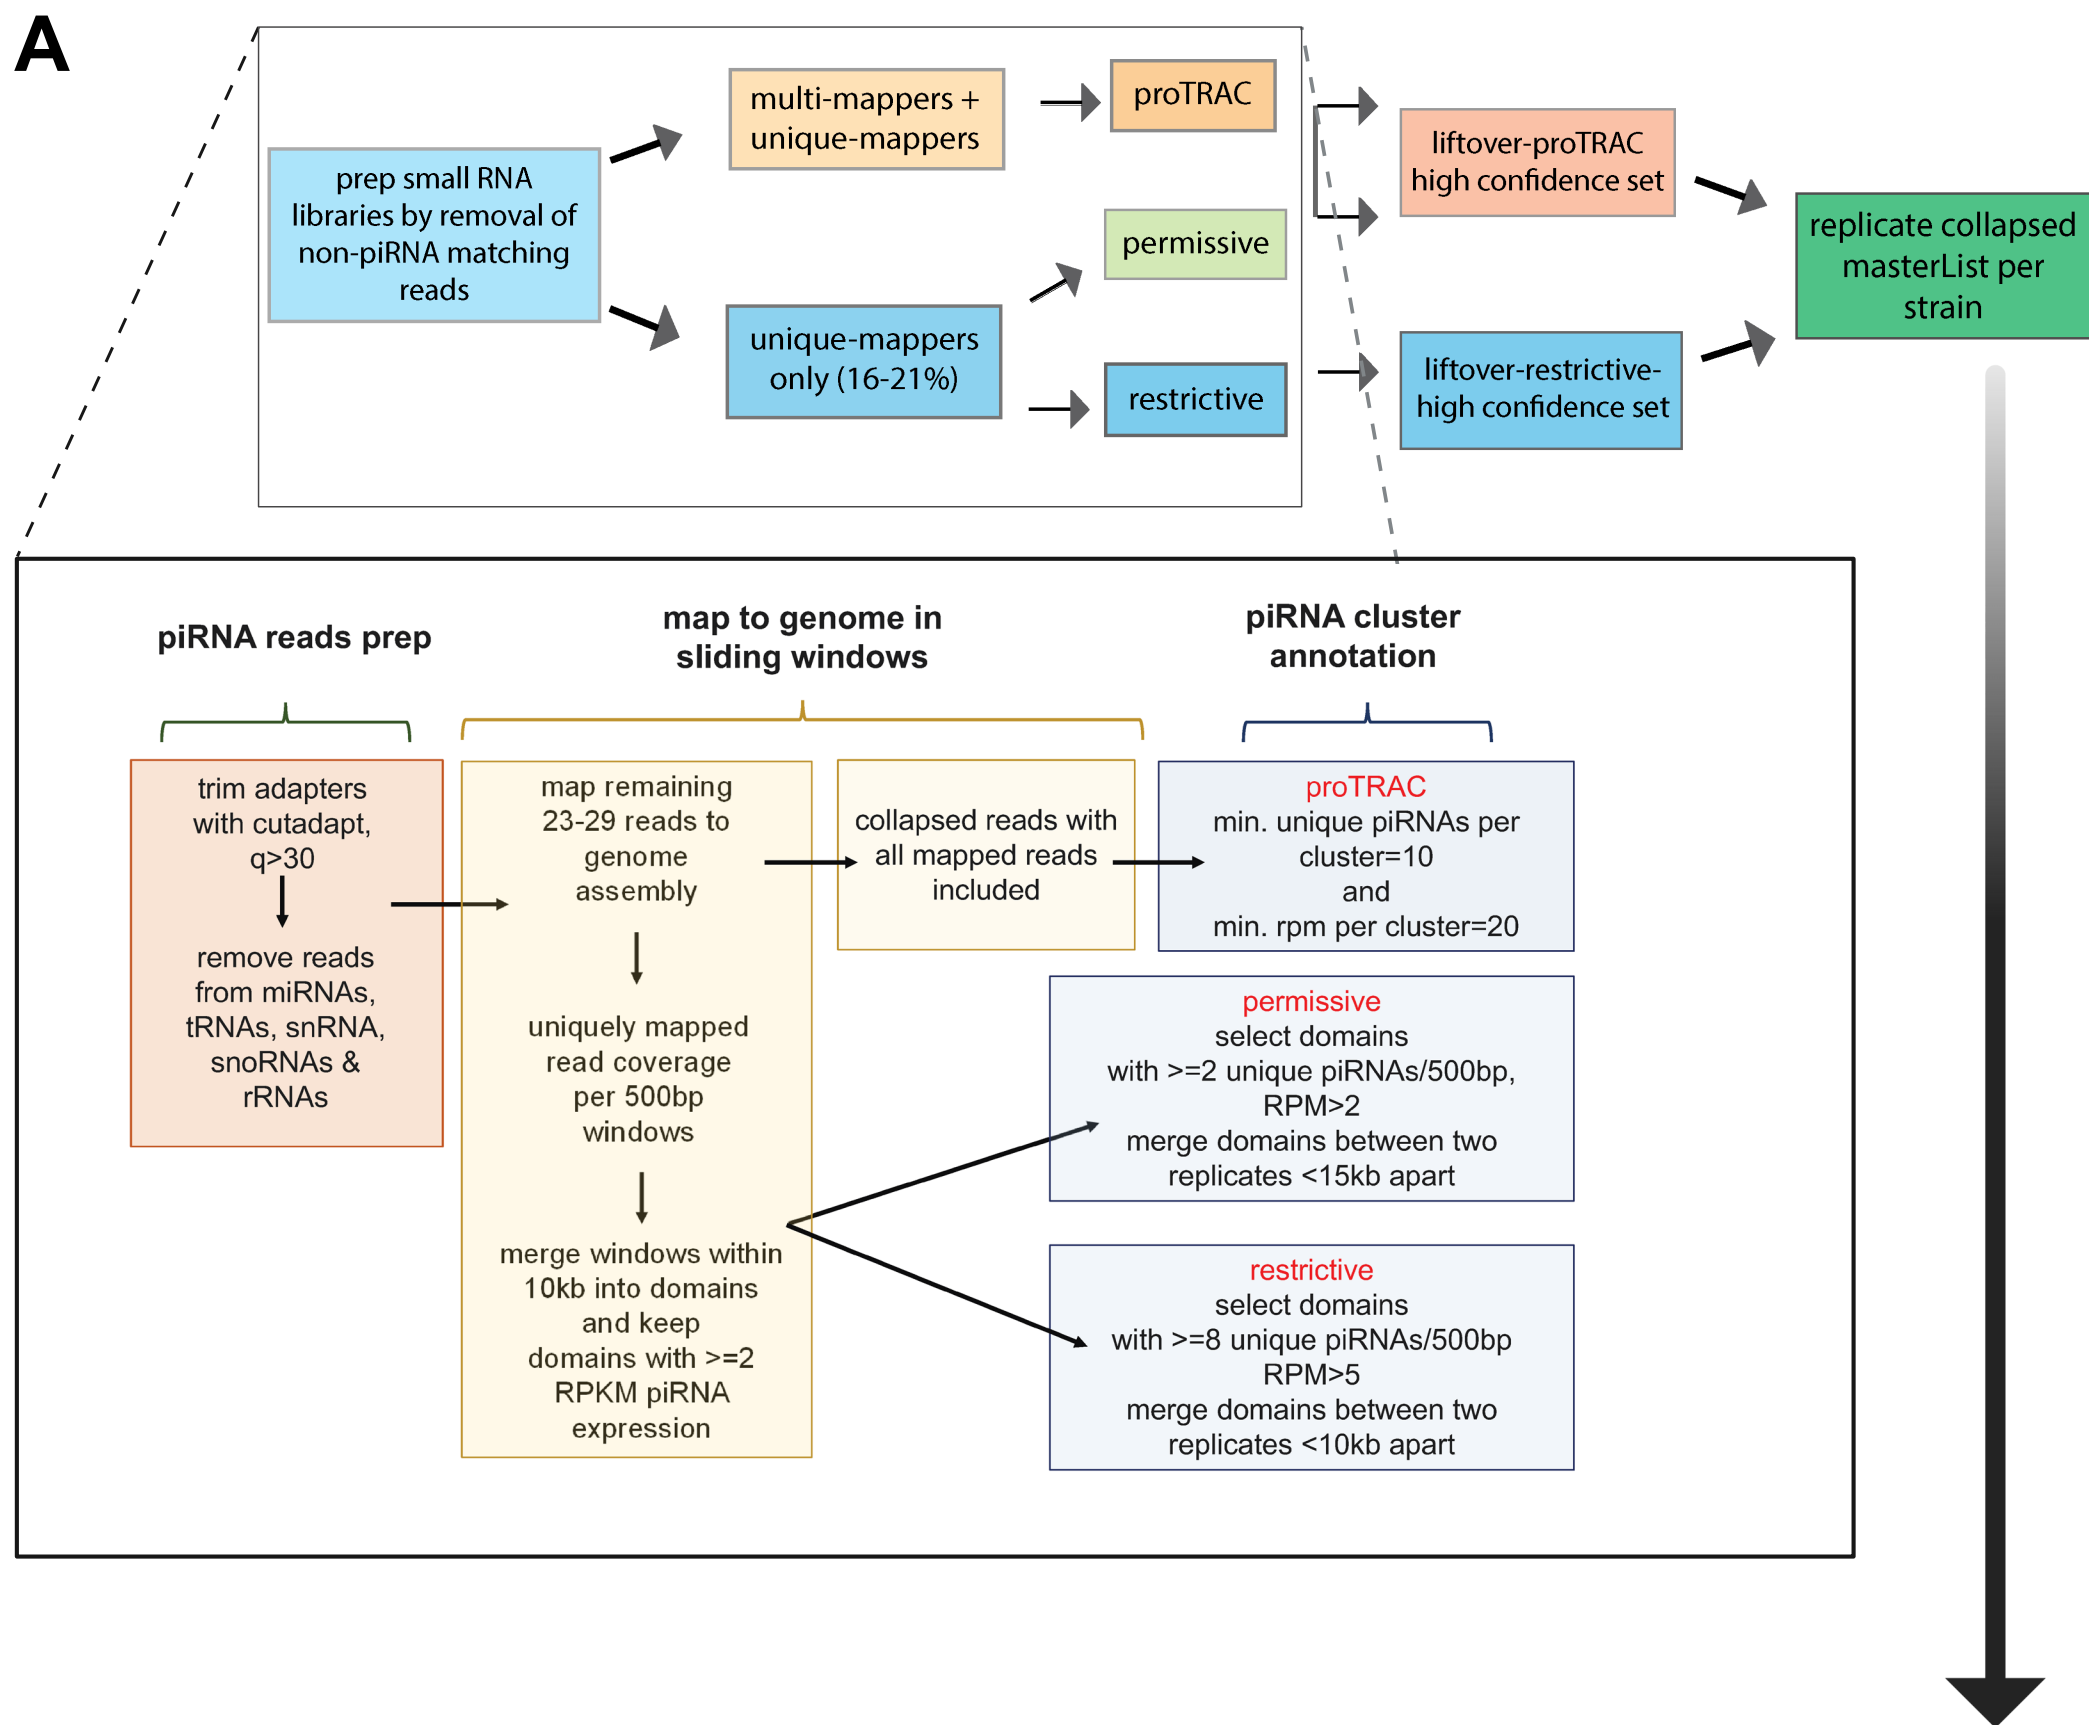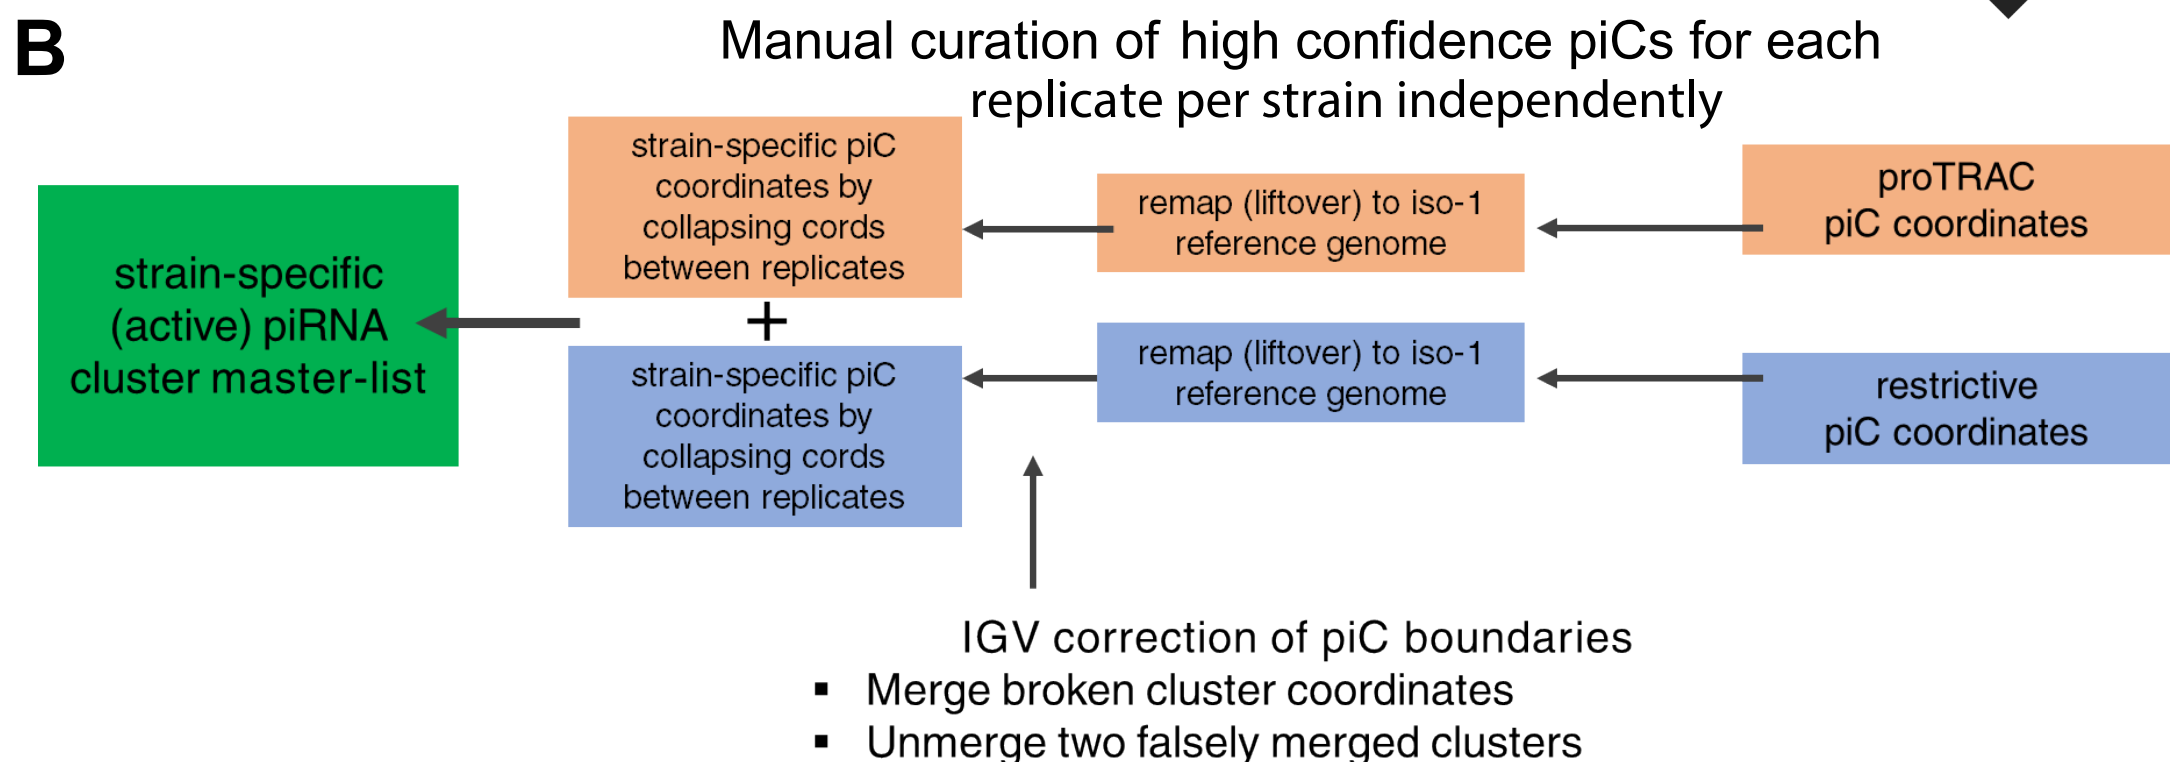

**Supplementary\_Figure\_S2. Summary of piC annotation pipeline. (A)** Processing of small RNA library reads to enrich for piRNAs and identification of piRNA cluster-like ‘domains’. **(B)** Manual curation of piC coordinates using IGV browser before remapping to iso-1 coordinates. Strain-specific (piCs coordinates curated for a strain, not that it’s only present in that strain) are created from combined annotations of *proTRAC* and *restrictive* methods.
