# Supplementary material for: Rapid evolution of piRNA clusters in the Drosophila melanogaster ovary
Source: HighWire-hosted journal article supplement (doi:10.1101/gr.278062.123), 2024-05-01
Supplement: Supplemental_Material.zip [file Supplemental_Fig_S3.pdf › Supplemental_Fig_S3.pdf]

A

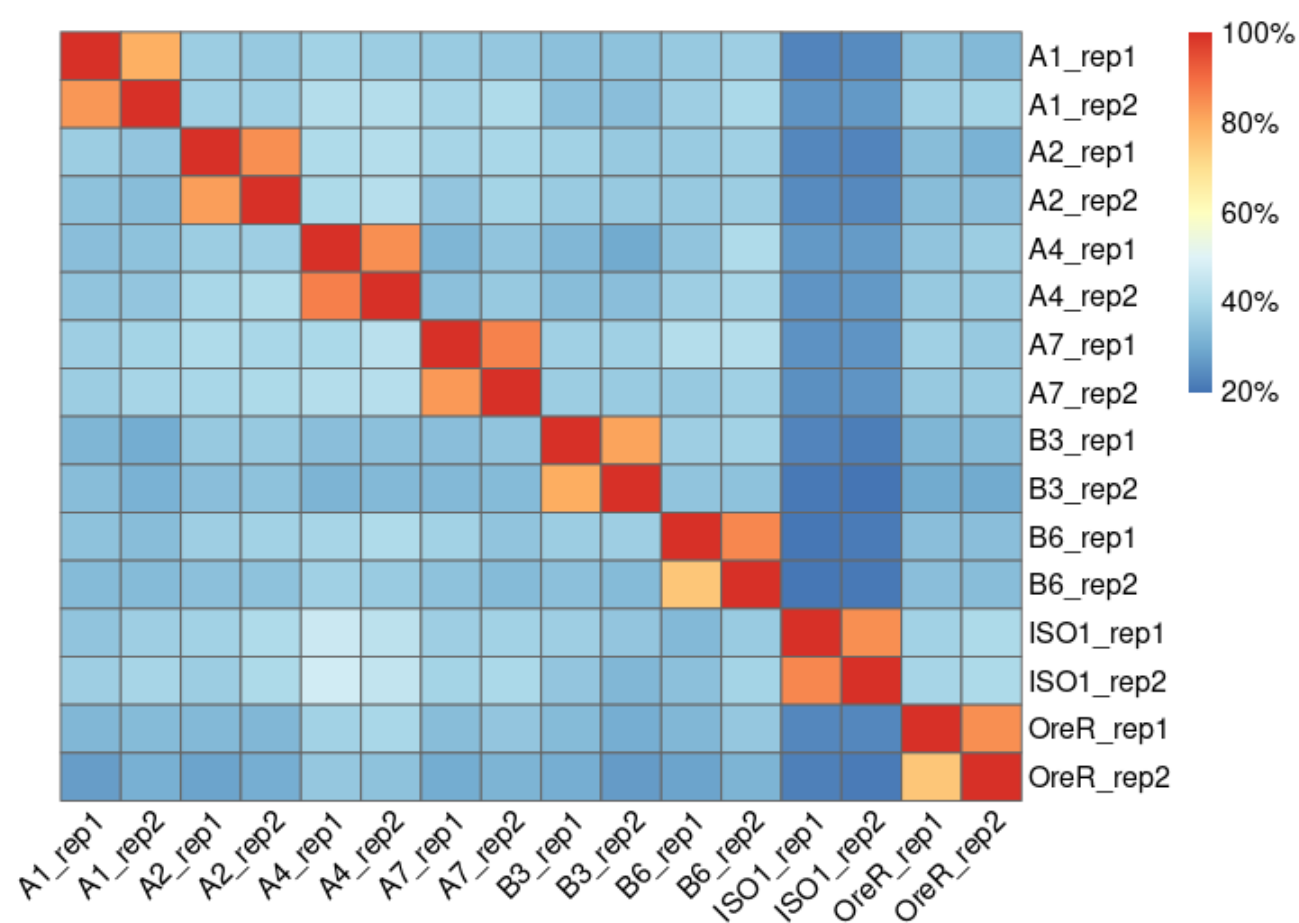

B

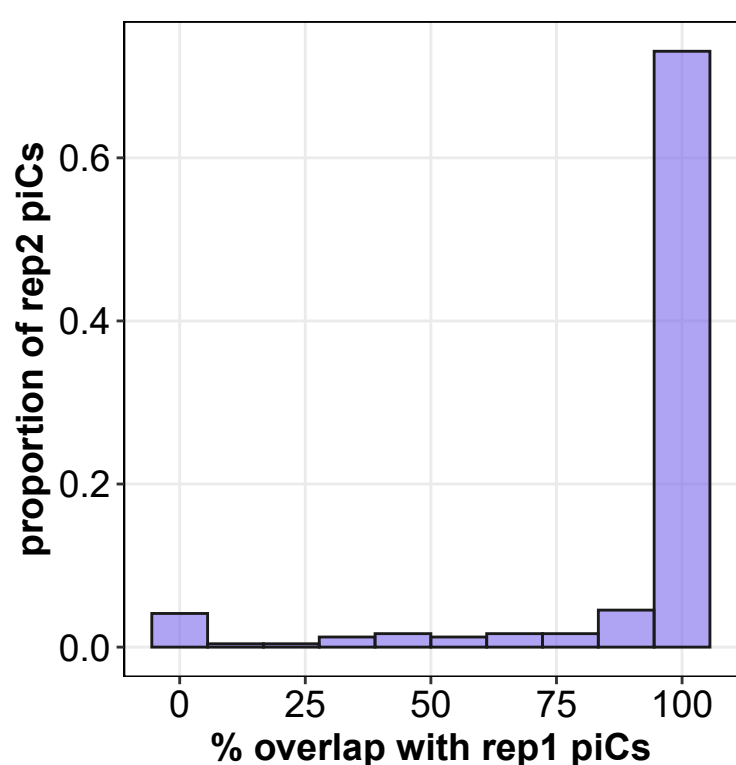

C

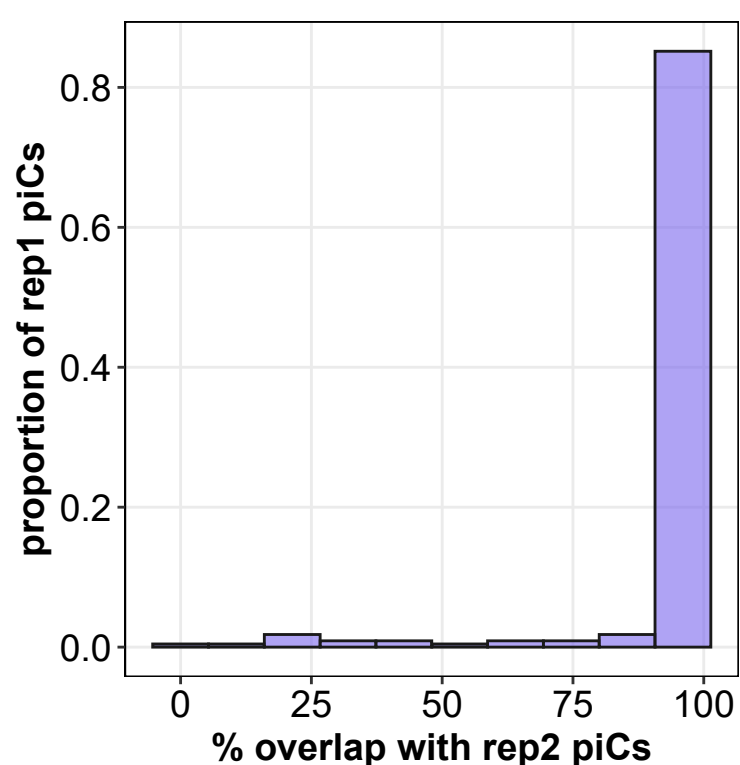

**Supplementary\_Figure\_S3.** Reproducibility of piC annotations. (A) ) Cross strain and replicate overlap (% of total piCs count) of independently predicted piCs for each small RNA library using the restrictive method. Inter-strain comparisons are done after liftover to iso-1 coordinates and overlap >1bp between two piCs is deemed as shared. Intra-strain comparisons are done similarly but in native genome assembly. (B&C) Histogram showing proportion of piCs that overlap 0-100% of their respective length in annotations between two biological replicates of strain A1 replicate 1 and replicate 2 small RNA libraries.
