# Supplementary material for: Rapid evolution of piRNA clusters in the Drosophila melanogaster ovary
Source: HighWire-hosted journal article supplement (doi:10.1101/gr.278062.123), 2024-05-01
Supplement: Supplemental_Material.zip [file Supplemental_Fig_S4.pdf › Supplemental_Fig_S4.pdf]

**A**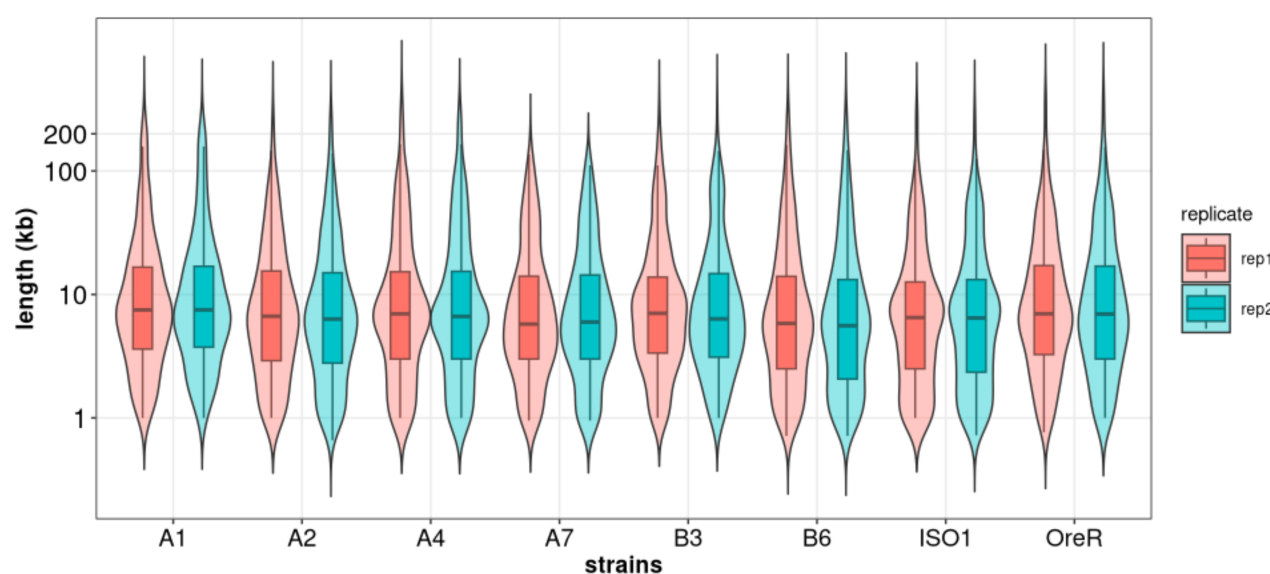**B**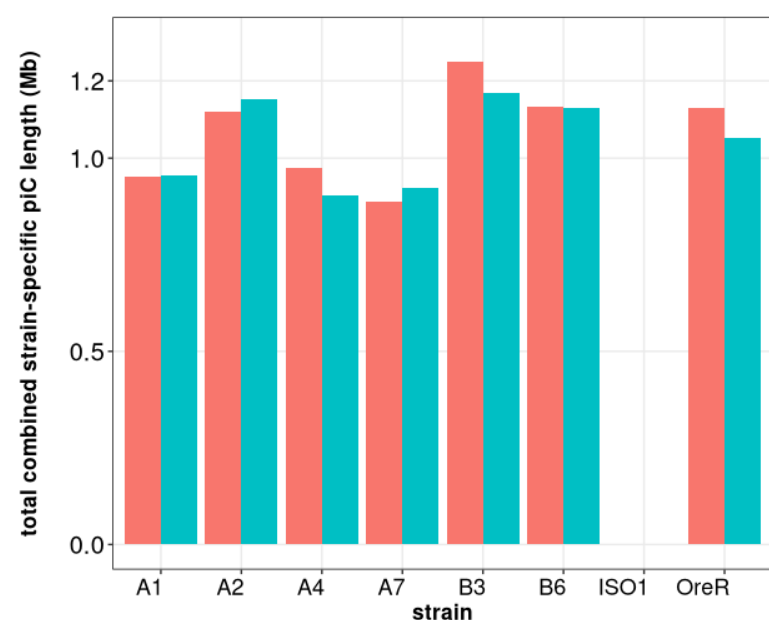**C**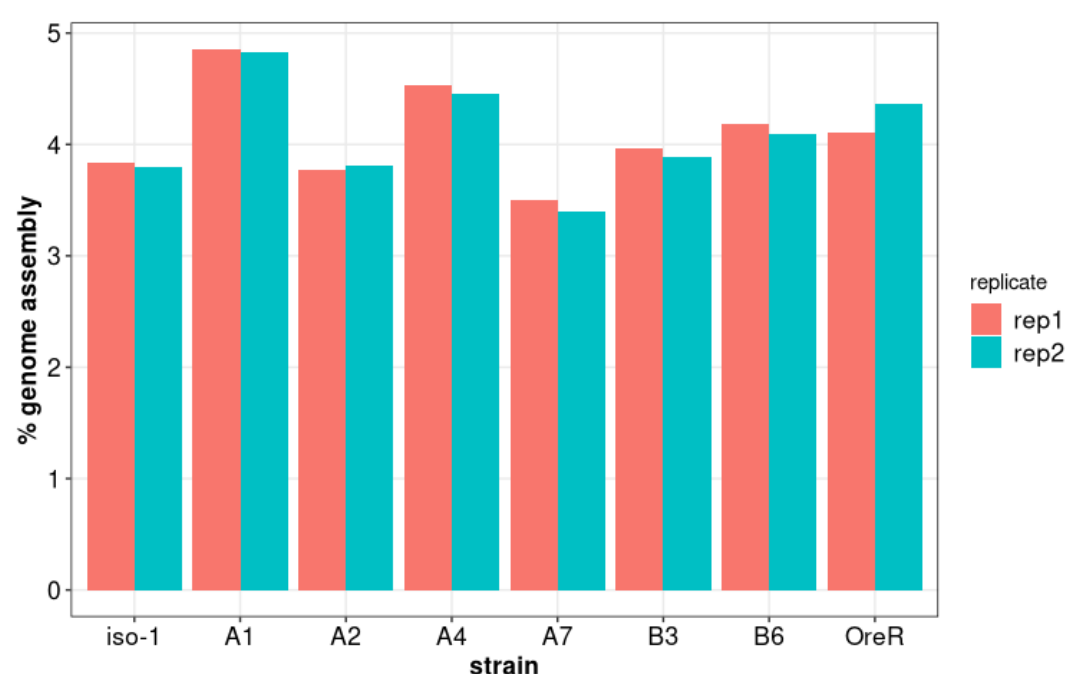**D**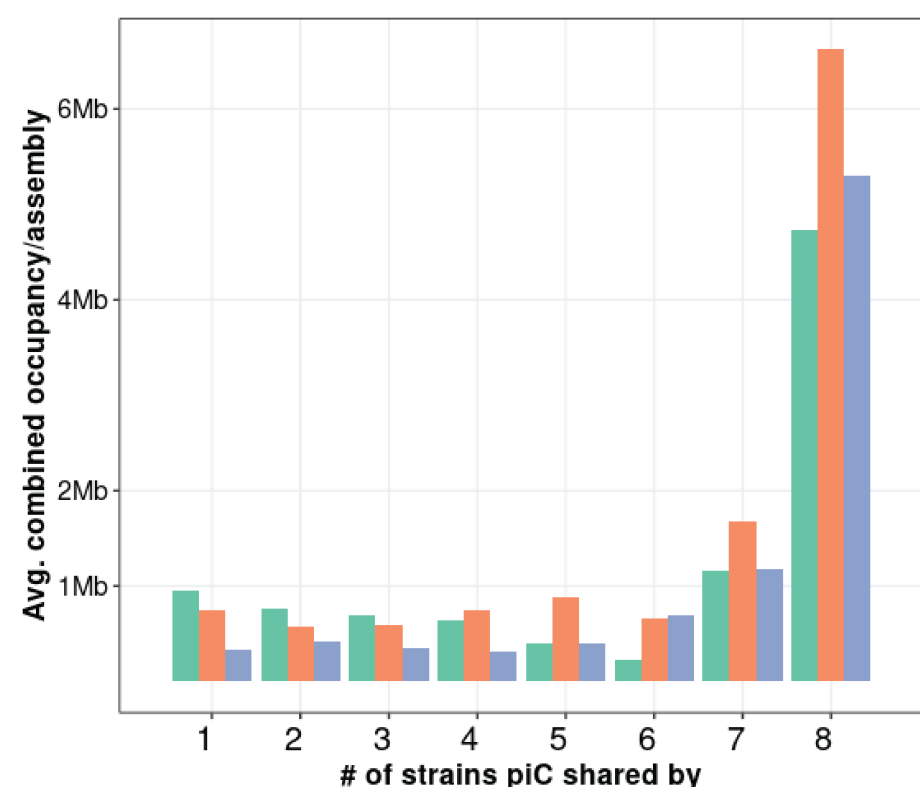

**Supplementary\_Figure\_S4. piC annotation metrics.** **(A)** Length distribution of piCs predicted independently from each small RNA library. **(B)** Combined genomic space of strain-specific piCs in the master-list from each strain. **(C)** Combined genomic space of all master-list piCs per replicate per strain in their native genome assemblies. **(D)** Average cumulative piC size from each annotation pipeline and grouped by sharing of piCs among strains post-liftOver (remap).
