# Supplementary material for: Rapid evolution of piRNA clusters in the Drosophila melanogaster ovary
Source: HighWire-hosted journal article supplement (doi:10.1101/gr.278062.123), 2024-05-01
Supplement: Supplemental_Material.zip [file Supplemental_Fig_S5.pdf › Supplemental_Fig_S5.pdf]

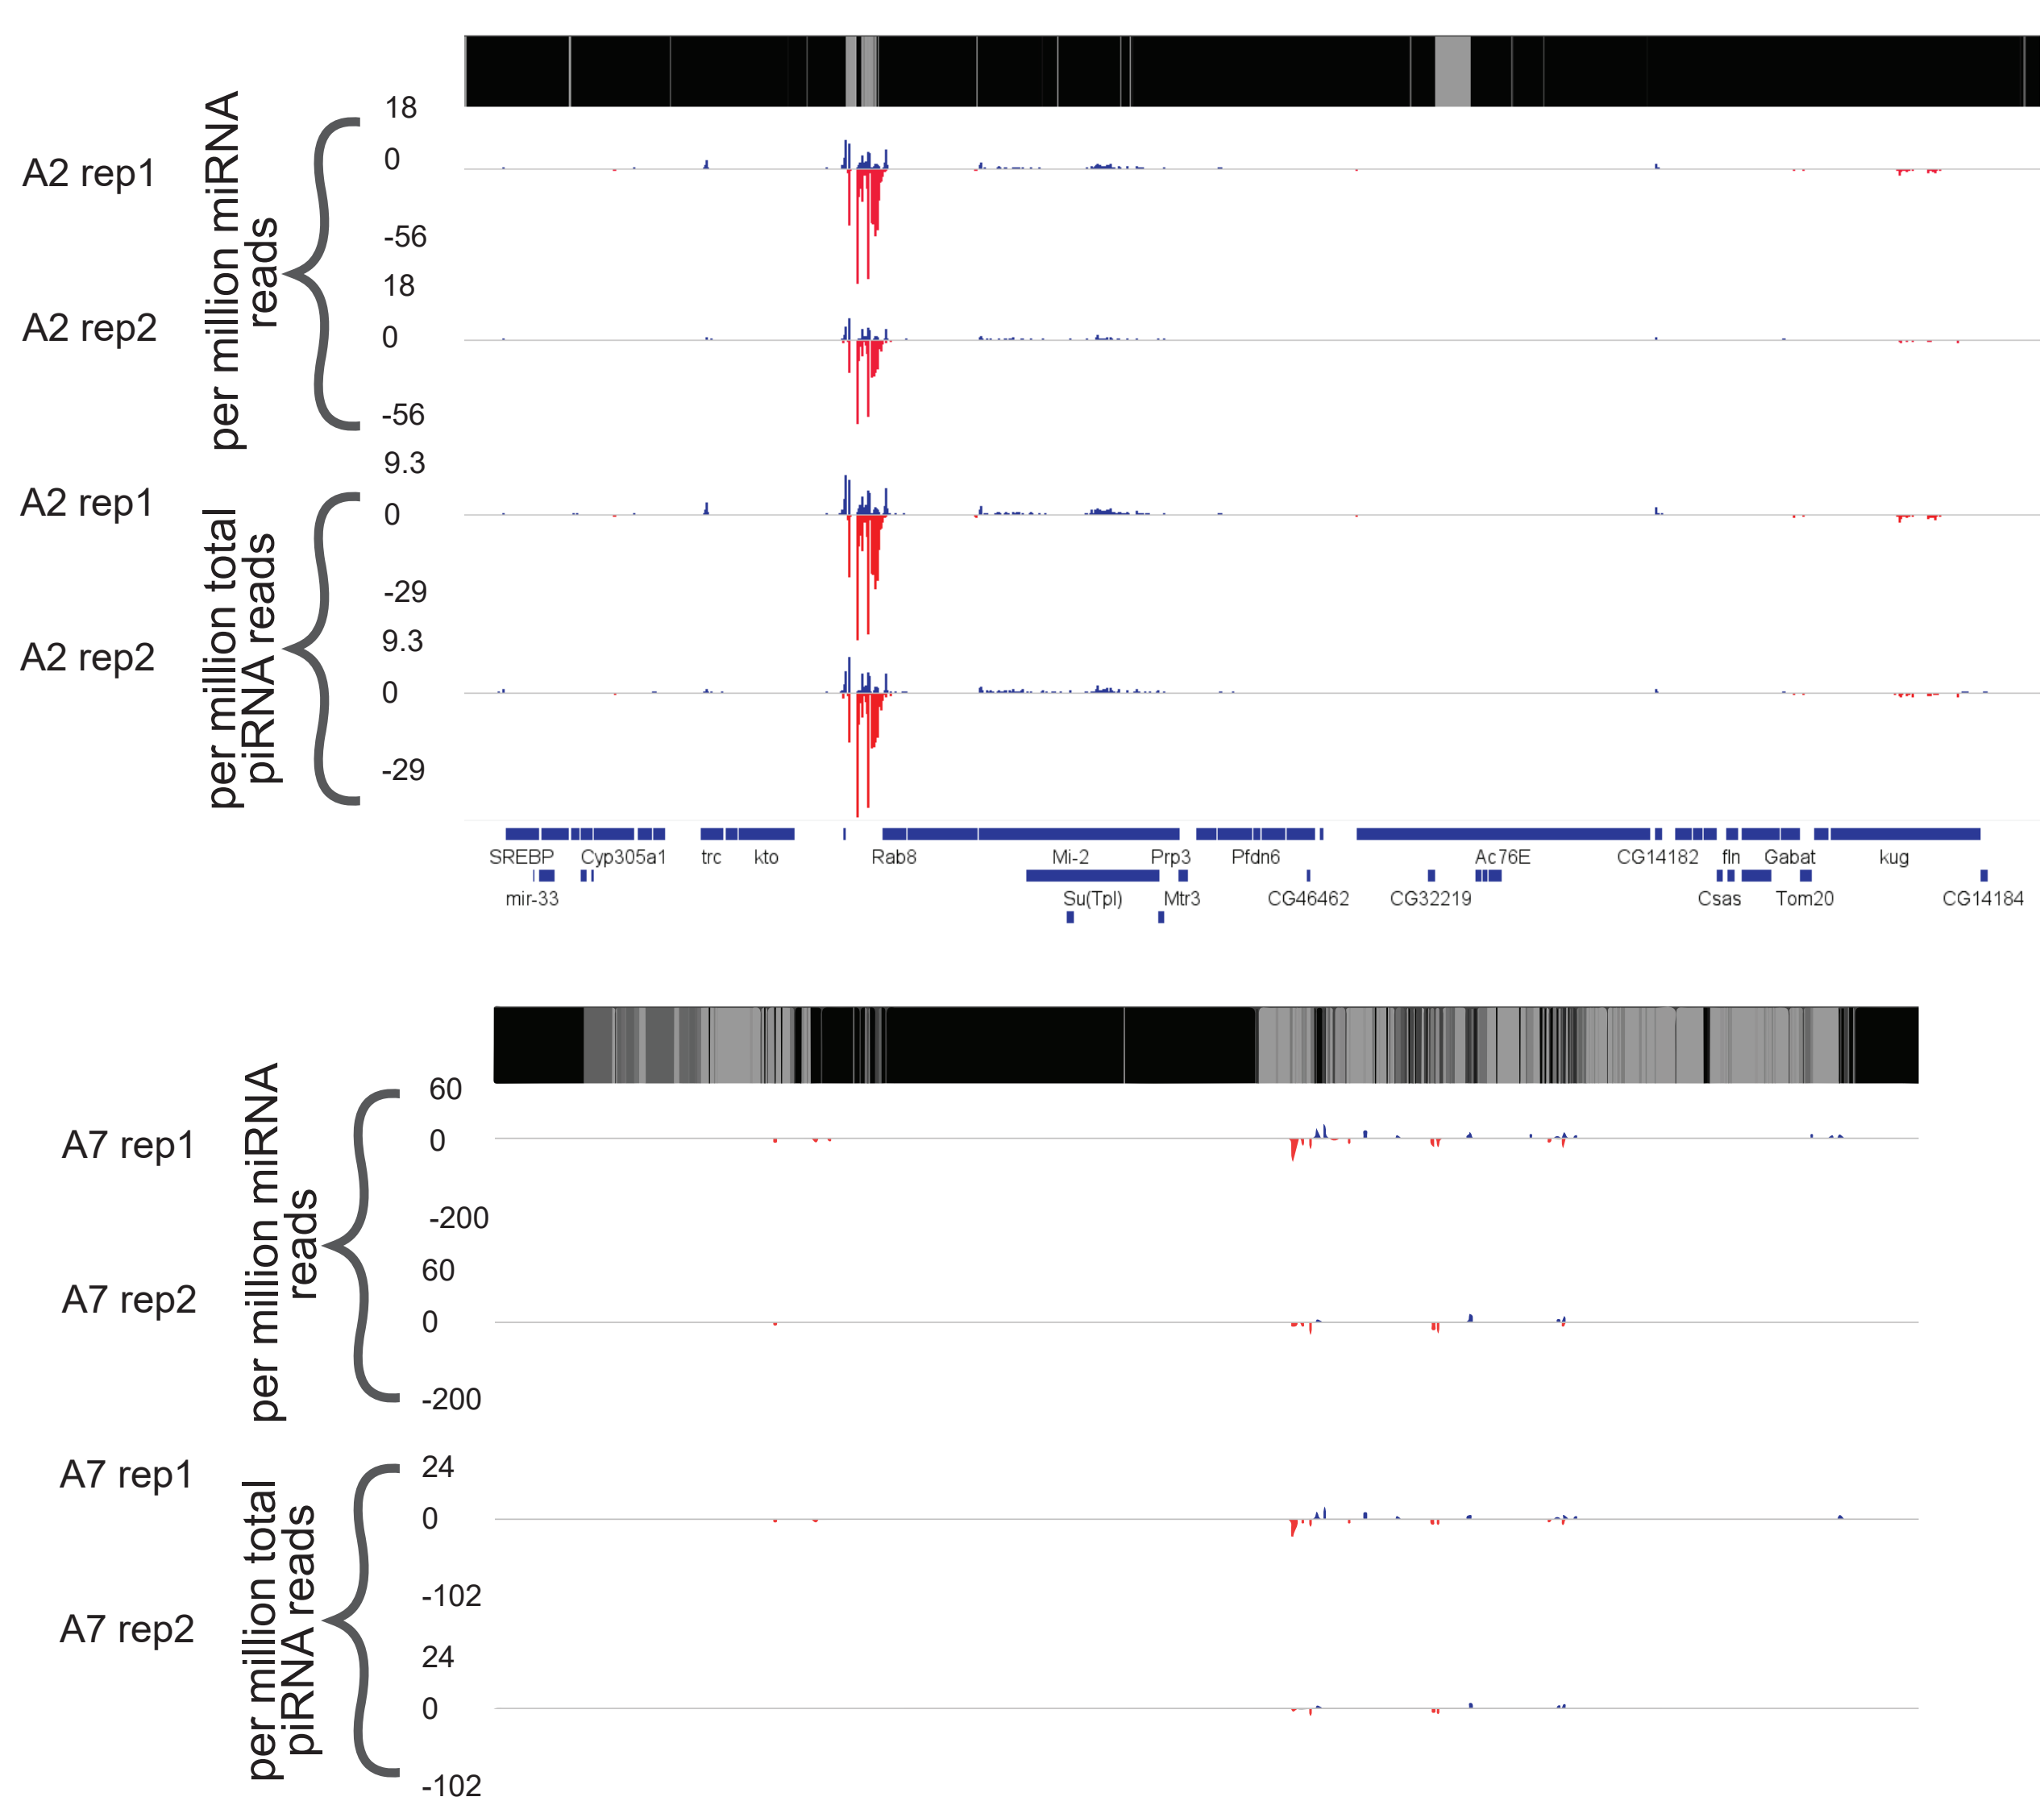

**Supplementary\_Fig\_S5. Congruence of piRNA coverage normalization methods for robust identification of active piCs.** (A) IGV browsershot of 76CDE piC loci (~350kb) in strain A2. Strain A2 only contains one active piC at 76D cytogenetic location and is supported by piRNA coverage calculated from per million miRNA reads and per million total piRNA reads. (B) Similarly, normalized piRNA coverage of 38C piC (150kb region) is shown in strain A1 for the two normalization strategies. A1 has the least amount of piRNA coverage of 38C among all strains analyzed in this study.
