# Supplementary material for: Rapid evolution of piRNA clusters in the Drosophila melanogaster ovary
Source: HighWire-hosted journal article supplement (doi:10.1101/gr.278062.123), 2024-05-01
Supplement: Supplemental_Material.zip [file Supplemental_Fig_S7.pdf › Supplemental_Fig_S7.pdf]

# Supplementary Fig S7

whole genome

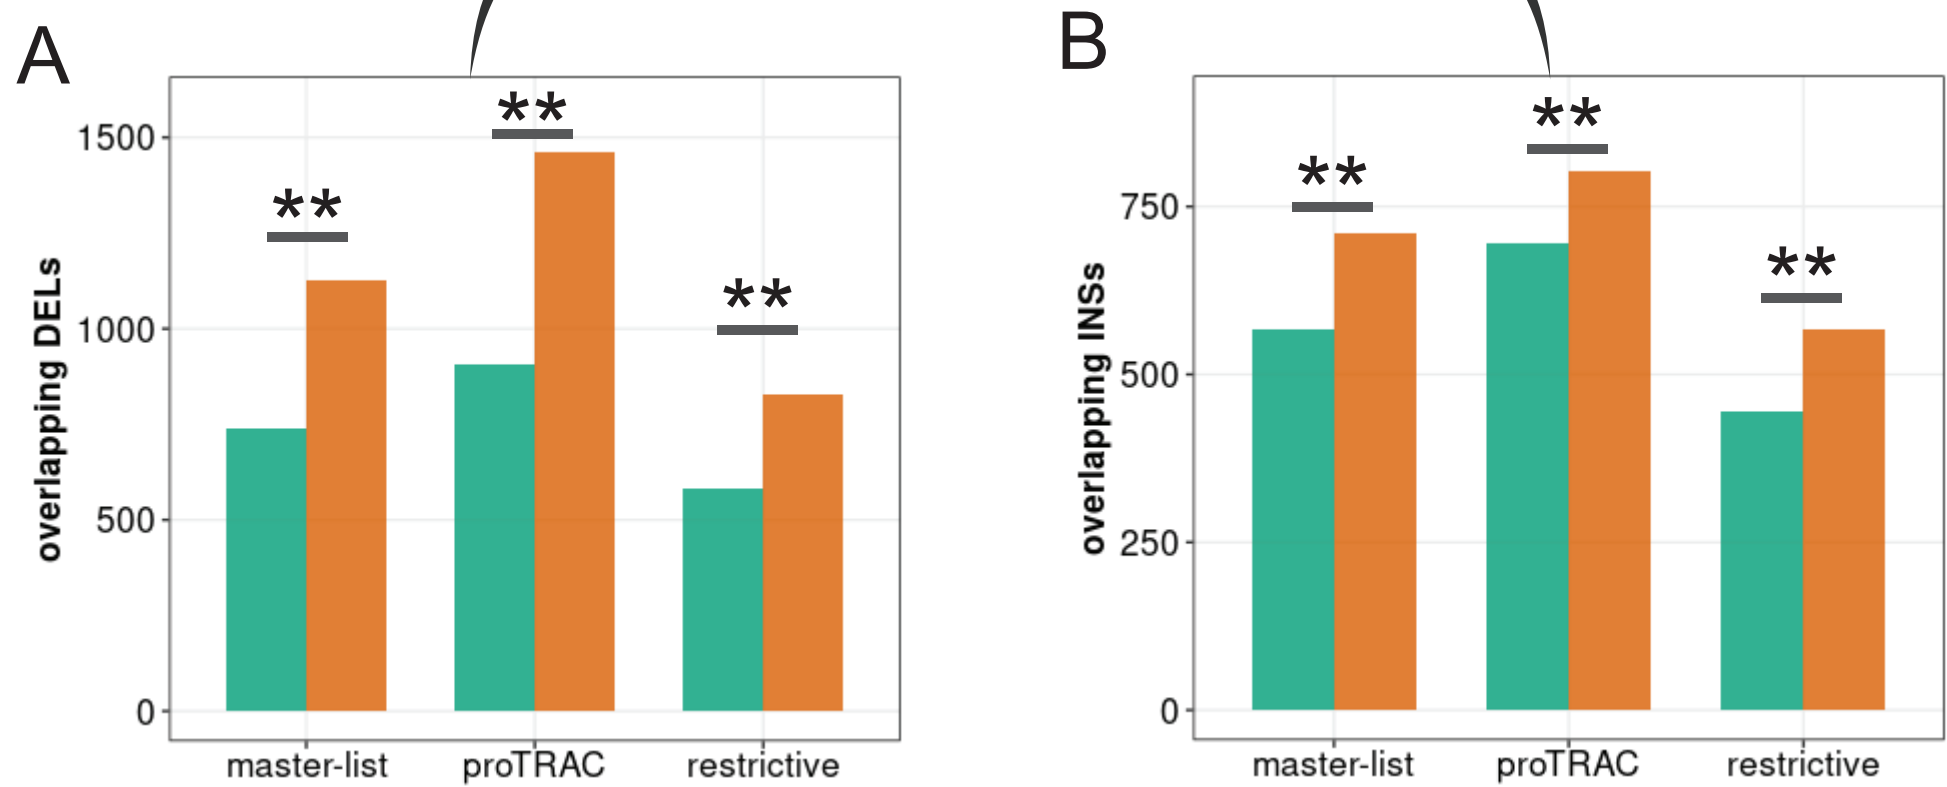

heterochromatin only  
(Riddle et al, 2010)

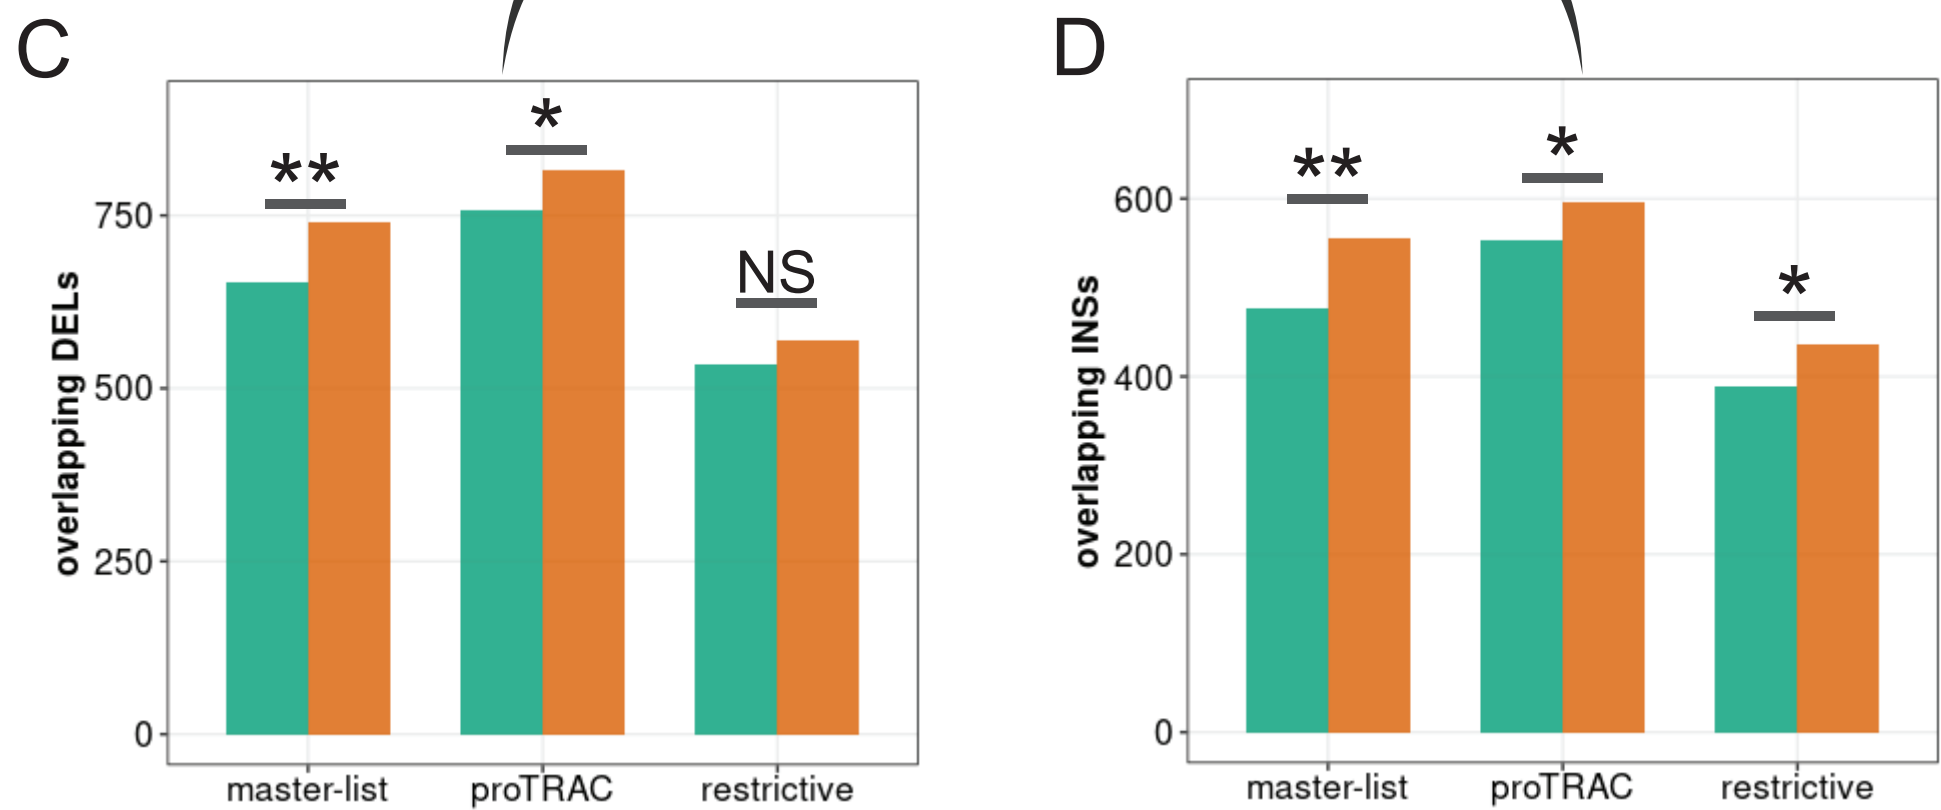

mean\_expected observed

**Supplementary\_Fig\_S7. Comparisons of INDEL enrichment across whole genome and heterochromatin only to the piC regions from master-list.** (A&B) Bar plots of observed and mean expected values of INDELs overlapping piCs and when piCs are randomly shuffled across whole genome. (C&D) Bar plots displaying observed and mean expected values of INDELs overlapping piCs and when piCs are shuffled only within heterochromatin boundaries. (p-value <0.05=\*, <0.005= \*\*)
