# Supplementary material for: Rapid evolution of piRNA clusters in the Drosophila melanogaster ovary
Source: HighWire-hosted journal article supplement (doi:10.1101/gr.278062.123), 2024-05-01
Supplement: Supplemental_Material.zip [file Supplemental_Fig_S8.pdf › Supplemental_Fig_S8.pdf]

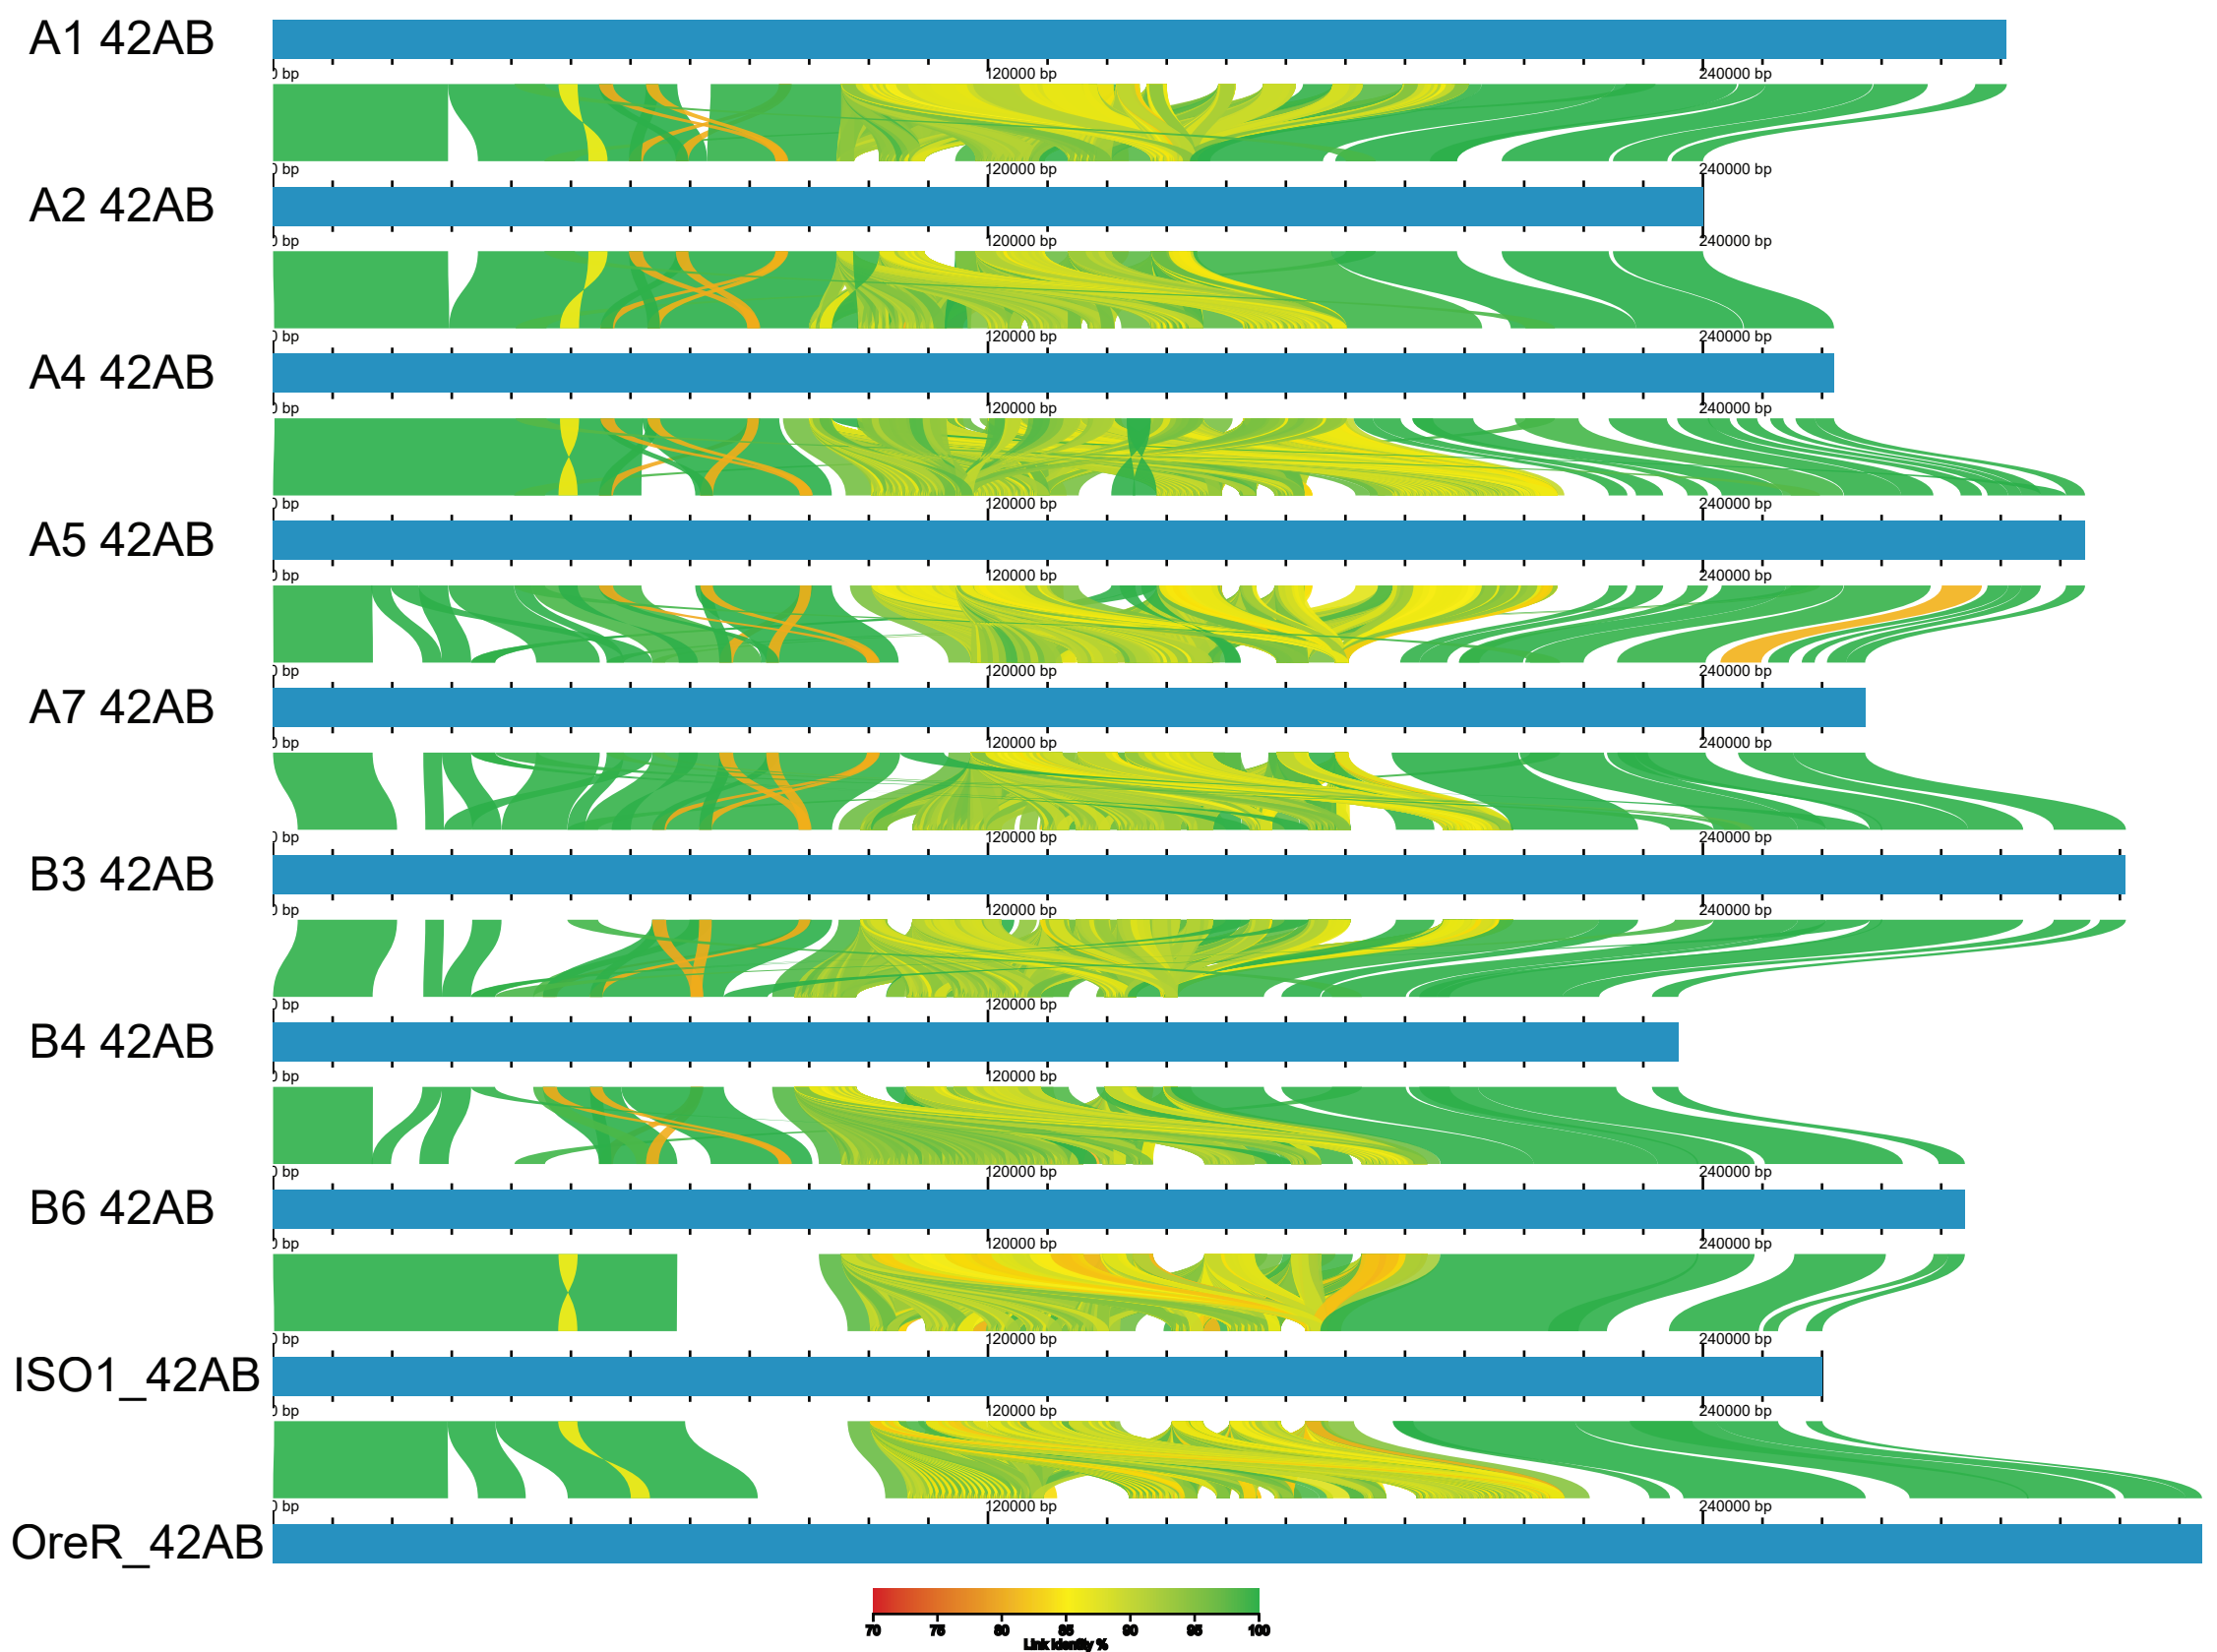

**Supplementary Figure 8. Structural changes in 42AB piC in 8 *D. melanogaster* strains.** (A) Multiple sequence alignment visualization using AliTV.pl of major structural changes in 42AB piC assembly in 7 DSPR strains and iso-1. Only alignment lengths greater than 1kb and 80% identity determined from lastz are shown.
