# Supplementary material for: Rapid evolution of piRNA clusters in the Drosophila melanogaster ovary
Source: HighWire-hosted journal article supplement (doi:10.1101/gr.278062.123), 2024-05-01
Supplement: Supplemental_Material.zip [file Supplemental_Fig_S11.pdf › Supplemental_Fig_S11.pdf]

A

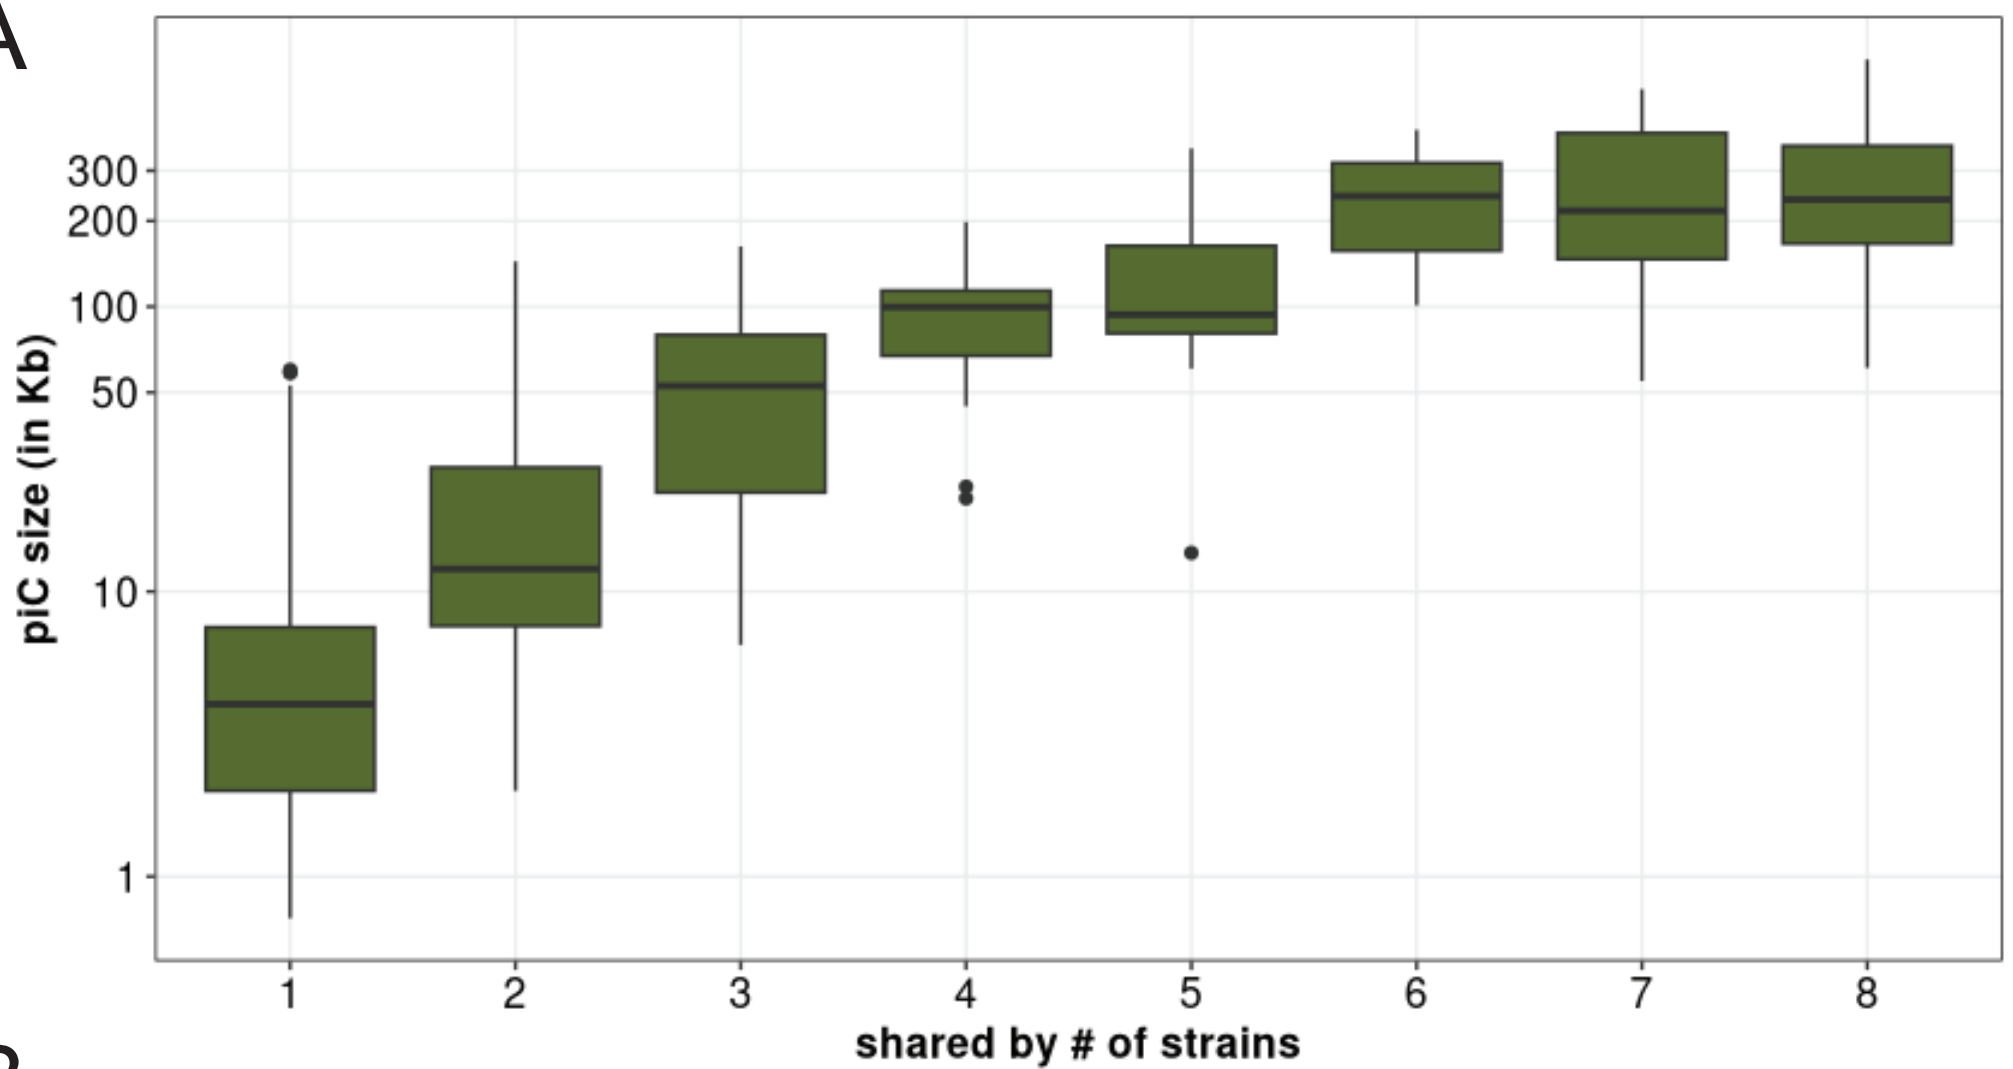

B

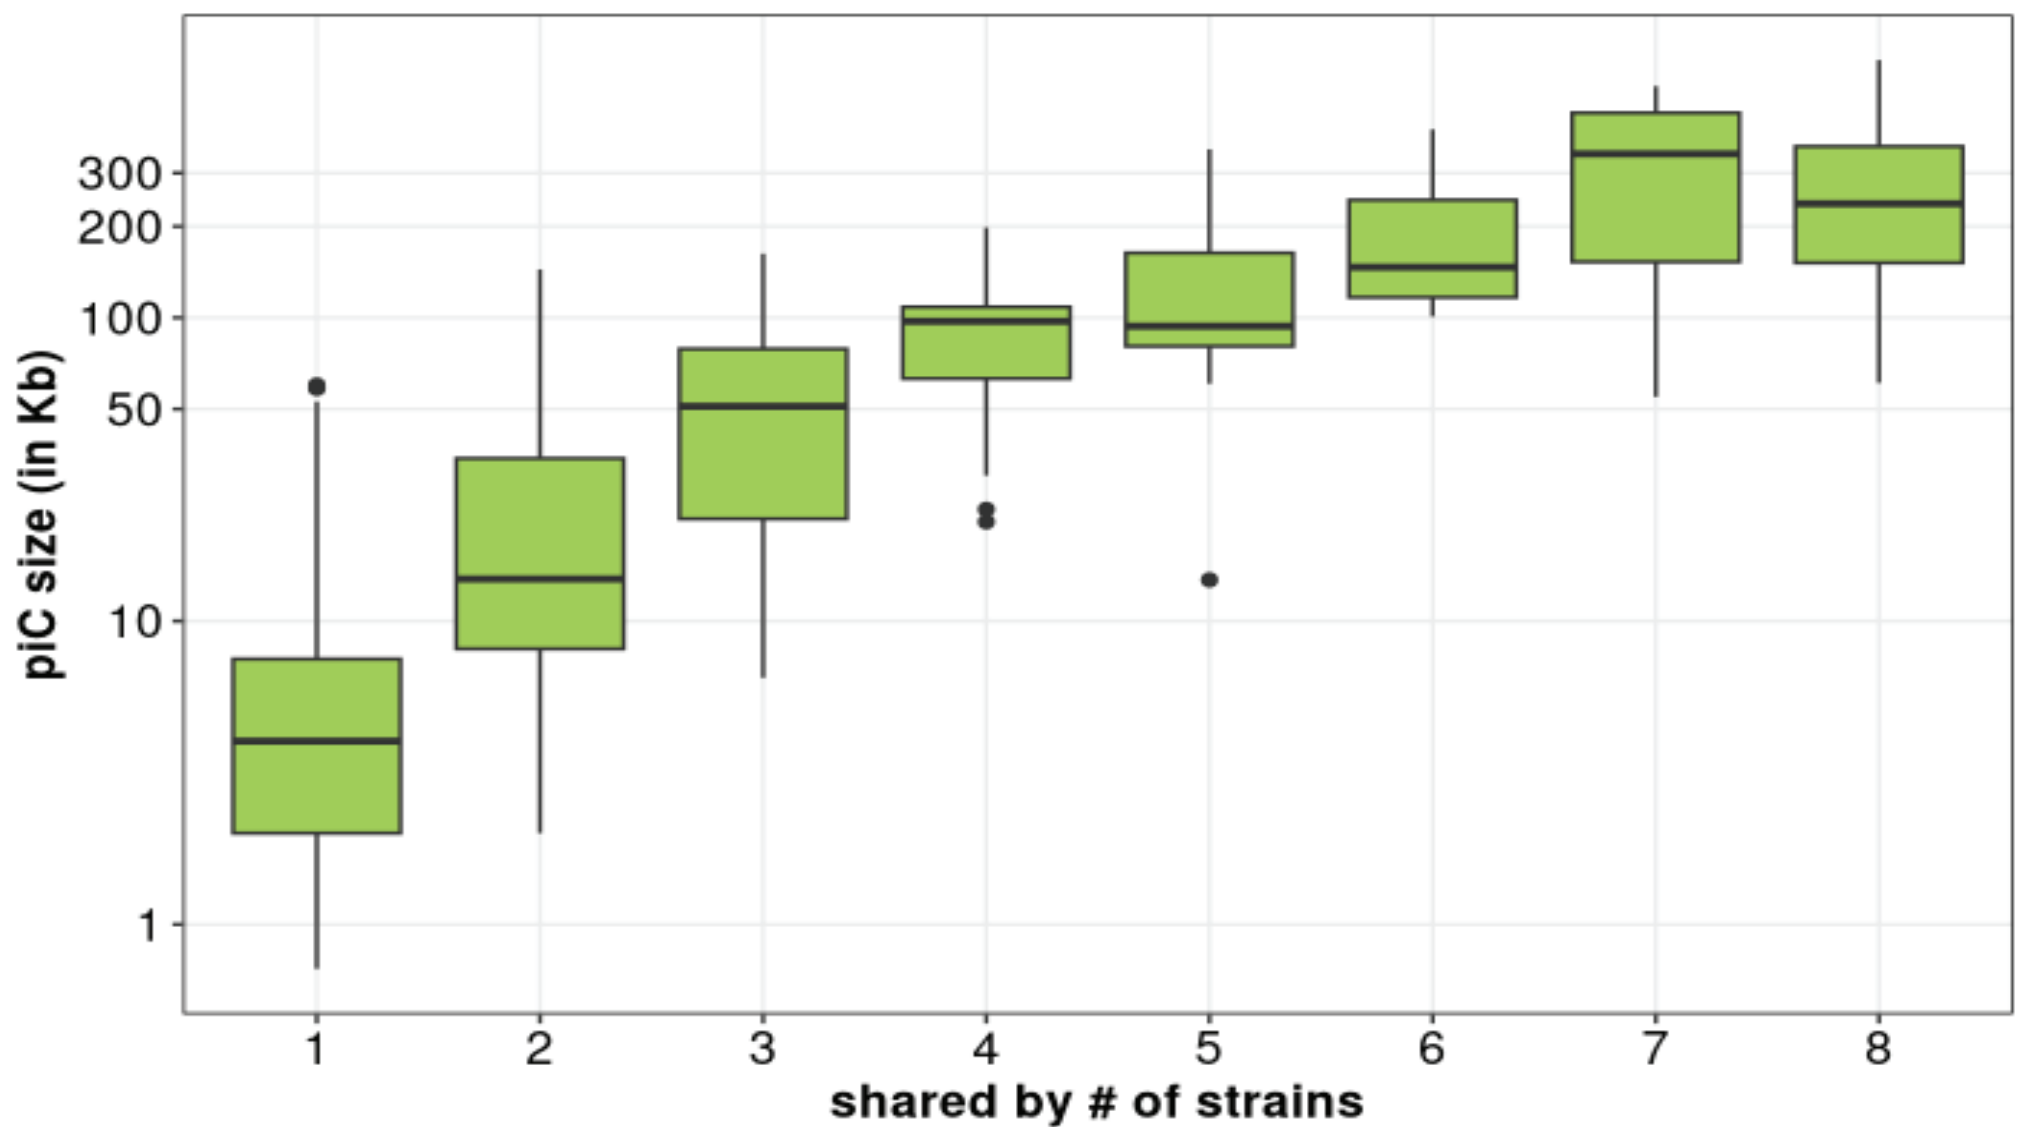

**Supplementary\_Fig\_S11. piC length distribution grouped by piC frequency based on differing overlap requirements.** (A) piC length distribution shown for each group of piC frequency (1/8 to 8/8) with minimum overlap requirement of 100bp to be considered as same piC between strains. (B) piC length distribution shown for each group of piC frequency (1/8 to 8/8) with minimum overlap requirement of 1000bp to be considered as same piC between strains.
