# Supplementary material for: Rapid evolution of piRNA clusters in the Drosophila melanogaster ovary
Source: HighWire-hosted journal article supplement (doi:10.1101/gr.278062.123), 2024-05-01
Supplement: Supplemental_Material.zip [file Supplemental_Fig_S12.pdf › Supplemental_Fig_S12.pdf]

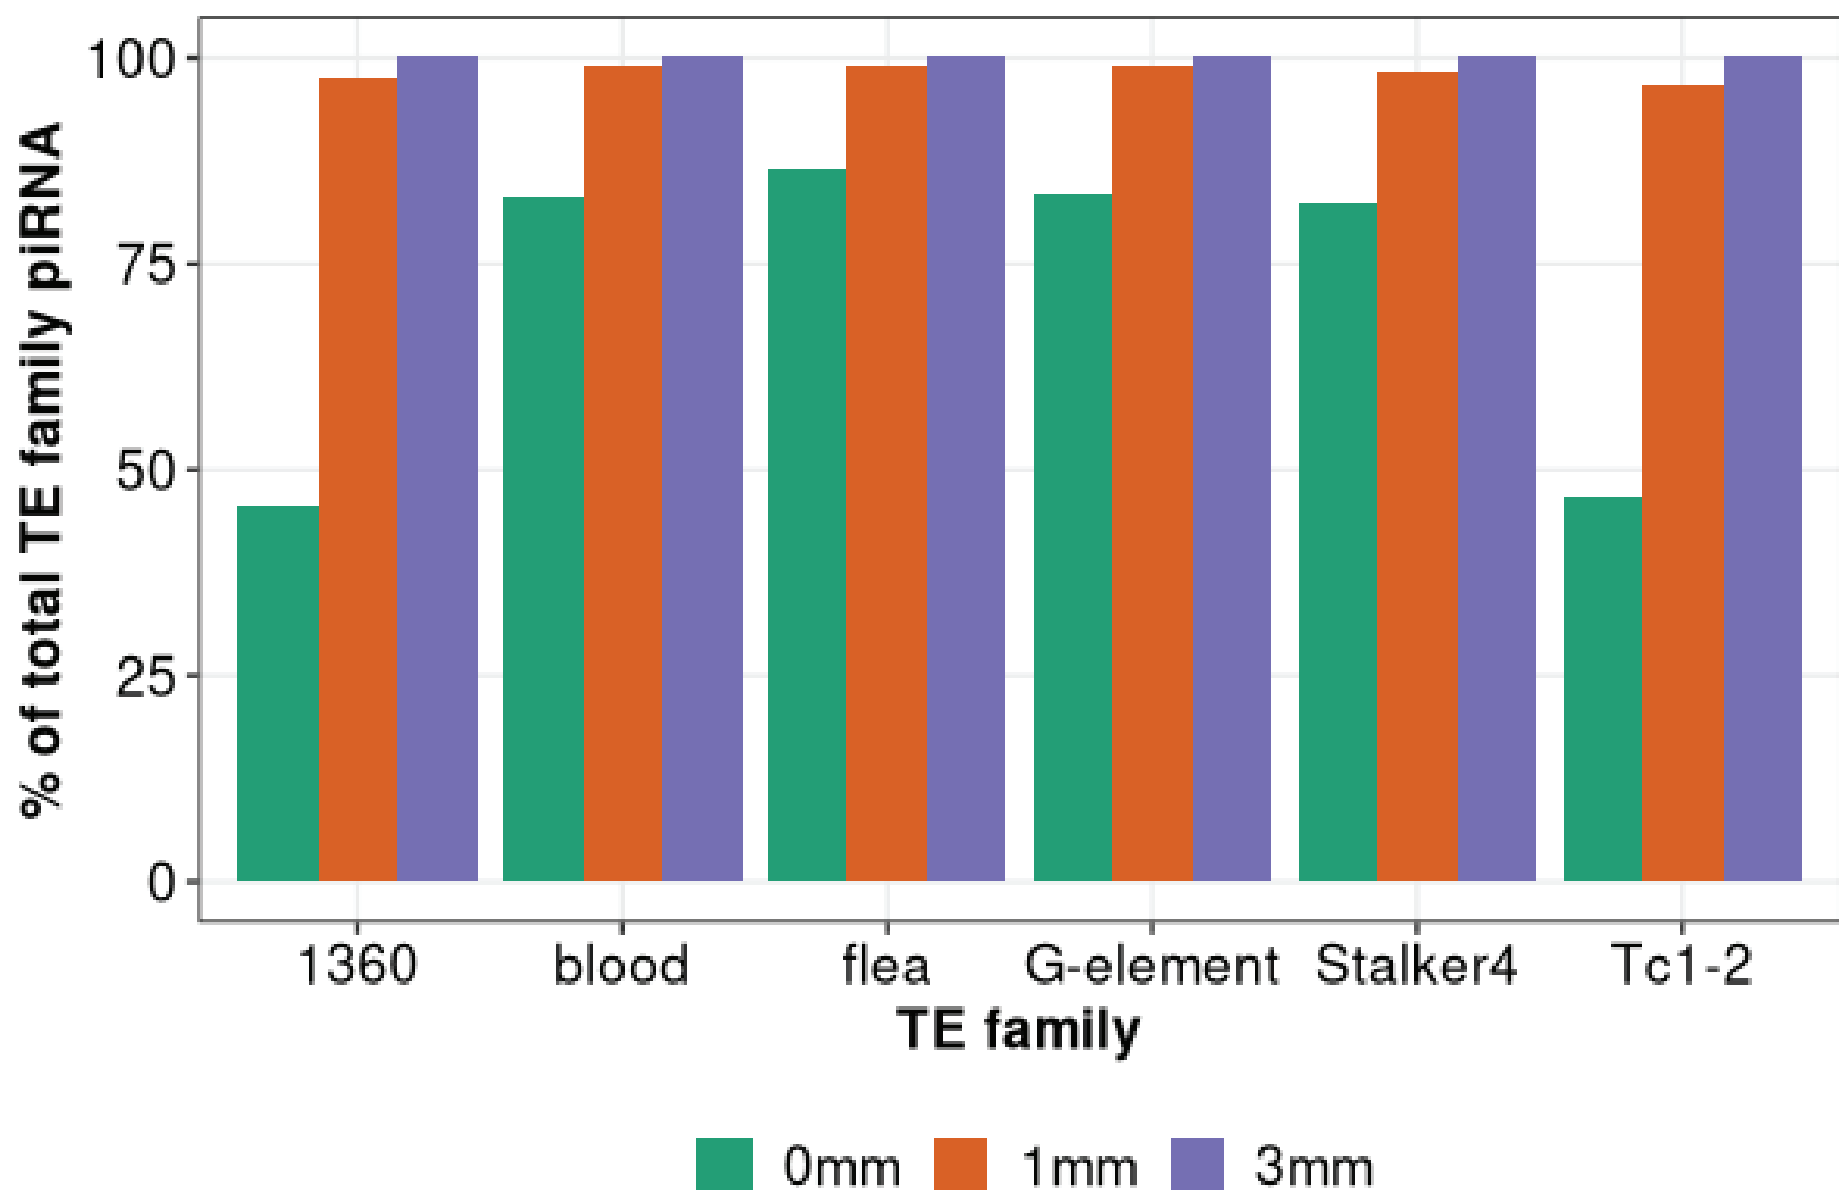

**Supplementary\_Fig\_S12.**Percentage of piRNAs mapping to TE family consensus by differing mismatch parameters in bowtie-1.3.1. Data for six TE families highlighted in Figures 4 and 5 are plotted. High amount of 0 mismatches (0mm) piRNAs imply most piRNAs arise from very recent insertions.
