# Supplementary material for: Rapid evolution of piRNA clusters in the Drosophila melanogaster ovary
Source: HighWire-hosted journal article supplement (doi:10.1101/gr.278062.123), 2024-05-01
Supplement: Supplemental_Material.zip [file Supplementary_Table_S2.xlsx]

## Sheet: Table S2 legend
Supplementary Table S2. Source information of publicly available data analyzed.

## Sheet: data analyzed
accession	sample_name	data_type	reference	other_names
SRR457673	b1_paired	illumina_wgs_reads	King EG et al, 2012	A1
SRR457689	b1_paired	illumina_wgs_reads	King EG et al, 2012	A1
SRR457692	b1_paired	illumina_wgs_reads	King EG et al, 2012	A1
SRR457671	b3841_paired	illumina_wgs_reads	King EG et al, 2012	A2
SRR457698	b3841_paired	illumina_wgs_reads	King EG et al, 2012	A2
SRR457711	b3841_paired	illumina_wgs_reads	King EG et al, 2012	A2
SRR457665	b3852_paired	illumina_wgs_reads	King EG et al, 2012	A4
SRR457666	b3852_paired	illumina_wgs_reads	King EG et al, 2012	A4
SRR457707	b3852_paired	illumina_wgs_reads	King EG et al, 2012	A4
SRR457669	b3875_paired	illumina_wgs_reads	King EG et al, 2012	A5
SRR457686	b3875_paired	illumina_wgs_reads	King EG et al, 2012	A5
SRR457693	b3875_paired	illumina_wgs_reads	King EG et al, 2012	A5
SRR457676	t7_paired	illumina_wgs_reads	King EG et al, 2012	A7
SRR457681	t7_paired	illumina_wgs_reads	King EG et al, 2012	A7
SRR457684	t7_paired	illumina_wgs_reads	King EG et al, 2012	A7
SRR457674	b3864_paired	illumina_wgs_reads	King EG et al, 2012	B3
SRR457678	b3864_paired	illumina_wgs_reads	King EG et al, 2012	B3
SRR457685	b3864_paired	illumina_wgs_reads	King EG et al, 2012	B3
SRR457683	b3870_paired	illumina_wgs_reads	King EG et al, 2012	B4
SRR457687	b3870_paired	illumina_wgs_reads	King EG et al, 2012	B4
SRR457701	b3870_paired	illumina_wgs_reads	King EG et al, 2012	B4
SRR457664	t1_paired	illumina_wgs_reads	King EG et al, 2012	B6
SRR457696	t1_paired	illumina_wgs_reads	King EG et al, 2012	B6
SRR457706	t1_paired	illumina_wgs_reads	King EG et al, 2012	B6
SRR4463858	wt_ovary_rep1	oxidixed small RNA	Jones BC et al, 2016	Can-S/A1
SRR4463859	wt_ovary_rep2	oxidixed small RNA	Jones BC et al, 2016	Can-S/A1
SRR4463860	wt_ovary_rep3	oxidixed small RNA	Jones BC et al, 2016	Can-S/A1
ERR1821661	Canton S	small RNA reads	Asif-Laidin et al, 2017	Can-S/A1
ERR1821663	y cn bw sp	small RNA reads	Asif-Laidin et al, 2017	ISO1
SRR827770	y cn bw sp	smallRNA_reads	Sergey S et al, 2014	ISO1
GCA_003397115.2	B6	genome_assembly	Chakraborty M et al, 2019
GCA_003401735.1	A1/Can-S	genome_assembly	Chakraborty M et al, 2019
GCA_003401745.1	A4	genome_assembly	Chakraborty M et al, 2019
GCA_003401805.1	A2	genome_assembly	Chakraborty M et al, 2019
GCA_003401915.1	A7	genome_assembly	Chakraborty M et al, 2019
GCA_003402015.1	OreR	genome_assembly	Chakraborty M et al, 2019
GCA_003402055.1	B3	genome_assembly	Chakraborty M et al, 2019
SRR7764450	A1_20kb_1	pacbio_wgs_reads	Chakraborty M et al, 2019
SRR7764451	A1_20kb_1	pacbio_wgs_reads	Chakraborty M et al, 2019
SRR7764452	A1_20kb_1	pacbio_wgs_reads	Chakraborty M et al, 2019
SRR7764453	A1_20kb_1	pacbio_wgs_reads	Chakraborty M et al, 2019
SRR7764454	A1_20kb_1	pacbio_wgs_reads	Chakraborty M et al, 2019
SRR7764455	A1_20kb_1	pacbio_wgs_reads	Chakraborty M et al, 2019
SRR7764456	A1_20kb_1	pacbio_wgs_reads	Chakraborty M et al, 2019
SRR7764457	A1_20kb_1	pacbio_wgs_reads	Chakraborty M et al, 2019
SRR7764458	A1_20kb_1	pacbio_wgs_reads	Chakraborty M et al, 2019
SRR7764459	A1_20kb_1	pacbio_wgs_reads	Chakraborty M et al, 2019
SRR7764460	A1_20kb_1	pacbio_wgs_reads	Chakraborty M et al, 2019
SRR7764461	A1_20kb_1	pacbio_wgs_reads	Chakraborty M et al, 2019
SRR7743062	A2_20Kb_1	pacbio_wgs_reads	Chakraborty M et al, 2019
SRR7743063	A2_20Kb_1	pacbio_wgs_reads	Chakraborty M et al, 2019
SRR7743064	A2_20Kb_1	pacbio_wgs_reads	Chakraborty M et al, 2019
SRR7743065	A2_20Kb_1	pacbio_wgs_reads	Chakraborty M et al, 2019
SRR7743066	A2_20Kb_1	pacbio_wgs_reads	Chakraborty M et al, 2019
SRR7743067	A2_20Kb_1	pacbio_wgs_reads	Chakraborty M et al, 2019
SRR7743068	A2_20Kb_1	pacbio_wgs_reads	Chakraborty M et al, 2019
SRR7743069	A2_20Kb_1	pacbio_wgs_reads	Chakraborty M et al, 2019
SRR7743070	A2_20Kb_1	pacbio_wgs_reads	Chakraborty M et al, 2019
SRR7743071	A2_20Kb_1	pacbio_wgs_reads	Chakraborty M et al, 2019
SRR7743072	A2_20Kb_1	pacbio_wgs_reads	Chakraborty M et al, 2019
SRR7743073	A2_20Kb_1	pacbio_wgs_reads	Chakraborty M et al, 2019
SRR7743074	A2_20Kb_1	pacbio_wgs_reads	Chakraborty M et al, 2019
SRR7743075	A2_20Kb_1	pacbio_wgs_reads	Chakraborty M et al, 2019
SRR7743076	A2_20Kb_1	pacbio_wgs_reads	Chakraborty M et al, 2019
SRR7743077	A2_20Kb_1	pacbio_wgs_reads	Chakraborty M et al, 2019
SRR7743078	A2_20Kb_1	pacbio_wgs_reads	Chakraborty M et al, 2019
SRR7743079	A2_20Kb_1	pacbio_wgs_reads	Chakraborty M et al, 2019
SRR7874275	A4_20kb_1	pacbio_wgs_reads	Chakraborty M et al, 2019
SRR7874276	A4_20kb_1	pacbio_wgs_reads	Chakraborty M et al, 2019
SRR7874277	A4_20kb_1	pacbio_wgs_reads	Chakraborty M et al, 2019
SRR7874278	A4_20kb_1	pacbio_wgs_reads	Chakraborty M et al, 2019
SRR7874279	A4_20kb_1	pacbio_wgs_reads	Chakraborty M et al, 2019
SRR7874280	A4_20kb_1	pacbio_wgs_reads	Chakraborty M et al, 2019
SRR7874281	A4_20kb_1	pacbio_wgs_reads	Chakraborty M et al, 2019
SRR7874282	A4_20kb_1	pacbio_wgs_reads	Chakraborty M et al, 2019
SRR7874283	A4_20kb_1	pacbio_wgs_reads	Chakraborty M et al, 2019
SRR7874284	A4_20kb_1	pacbio_wgs_reads	Chakraborty M et al, 2019
SRR7874285	A4_20kb_1	pacbio_wgs_reads	Chakraborty M et al, 2019
SRR7874286	A4_20kb_1	pacbio_wgs_reads	Chakraborty M et al, 2019
SRR7874287	A4_20kb_1	pacbio_wgs_reads	Chakraborty M et al, 2019
SRR7874288	A4_20kb_1	pacbio_wgs_reads	Chakraborty M et al, 2019
SRR7874289	A4_20kb_1	pacbio_wgs_reads	Chakraborty M et al, 2019
SRR7874290	A4_20kb_1	pacbio_wgs_reads	Chakraborty M et al, 2019
SRR7874291	A4_20kb_1	pacbio_wgs_reads	Chakraborty M et al, 2019
SRR7874292	A4_20kb_1	pacbio_wgs_reads	Chakraborty M et al, 2019
SRR7874293	A4_20kb_1	pacbio_wgs_reads	Chakraborty M et al, 2019
SRR7874294	A4_20kb_1	pacbio_wgs_reads	Chakraborty M et al, 2019
SRR7874295	A4_20kb_1	pacbio_wgs_reads	Chakraborty M et al, 2019
SRR7874296	A4_20kb_1	pacbio_wgs_reads	Chakraborty M et al, 2019
SRR7874297	A4_20kb_1	pacbio_wgs_reads	Chakraborty M et al, 2019
SRR7874298	A4_20kb_1	pacbio_wgs_reads	Chakraborty M et al, 2019
SRR7874299	A4_20kb_1	pacbio_wgs_reads	Chakraborty M et al, 2019
SRR7874300	A4_20kb_1	pacbio_wgs_reads	Chakraborty M et al, 2019
SRR7874301	A4_20kb_1	pacbio_wgs_reads	Chakraborty M et al, 2019
SRR7874302	A4_20kb_1	pacbio_wgs_reads	Chakraborty M et al, 2019
SRR7874303	A4_20kb_1	pacbio_wgs_reads	Chakraborty M et al, 2019
SRR7874304	A4_20kb_1	pacbio_wgs_reads	Chakraborty M et al, 2019
SRR7791727	A7_20kb_1	pacbio_wgs_reads	Chakraborty M et al, 2019
SRR7791728	A7_20kb_1	pacbio_wgs_reads	Chakraborty M et al, 2019
SRR7791729	A7_20kb_1	pacbio_wgs_reads	Chakraborty M et al, 2019
SRR7791730	A7_20kb_1	pacbio_wgs_reads	Chakraborty M et al, 2019
SRR7791731	A7_20kb_1	pacbio_wgs_reads	Chakraborty M et al, 2019
SRR7791732	A7_20kb_1	pacbio_wgs_reads	Chakraborty M et al, 2019
SRR7791733	A7_20kb_1	pacbio_wgs_reads	Chakraborty M et al, 2019
SRR7791734	A7_20kb_1	pacbio_wgs_reads	Chakraborty M et al, 2019
SRR7791735	A7_20kb_1	pacbio_wgs_reads	Chakraborty M et al, 2019
SRR7791736	A7_20kb_1	pacbio_wgs_reads	Chakraborty M et al, 2019
SRR7791737	A7_20kb_1	pacbio_wgs_reads	Chakraborty M et al, 2019
SRR7791738	A7_20kb_1	pacbio_wgs_reads	Chakraborty M et al, 2019
SRR7791739	A7_20kb_1	pacbio_wgs_reads	Chakraborty M et al, 2019
SRR7791740	A7_20kb_1	pacbio_wgs_reads	Chakraborty M et al, 2019
SRR7791741	A7_20kb_1	pacbio_wgs_reads	Chakraborty M et al, 2019
SRR7791742	A7_20kb_1	pacbio_wgs_reads	Chakraborty M et al, 2019
SRR7791743	A7_20kb_1	pacbio_wgs_reads	Chakraborty M et al, 2019
SRR7790893	B3_20kb_1	pacbio_wgs_reads	Chakraborty M et al, 2019
SRR7790894	B3_20kb_1	pacbio_wgs_reads	Chakraborty M et al, 2019
SRR7790895	B3_20kb_1	pacbio_wgs_reads	Chakraborty M et al, 2019
SRR7790896	B3_20kb_1	pacbio_wgs_reads	Chakraborty M et al, 2019
SRR7790897	B3_20kb_1	pacbio_wgs_reads	Chakraborty M et al, 2019
SRR7790898	B3_20kb_1	pacbio_wgs_reads	Chakraborty M et al, 2019
SRR7790899	B3_20kb_1	pacbio_wgs_reads	Chakraborty M et al, 2019
SRR7790900	B3_20kb_1	pacbio_wgs_reads	Chakraborty M et al, 2019
SRR7790901	B3_20kb_1	pacbio_wgs_reads	Chakraborty M et al, 2019
SRR7790902	B3_20kb_1	pacbio_wgs_reads	Chakraborty M et al, 2019
SRR7790903	B3_20kb_1	pacbio_wgs_reads	Chakraborty M et al, 2019
SRR7816669	B6_20kb_1	pacbio_wgs_reads	Chakraborty M et al, 2019
SRR7816670	B6_20kb_1	pacbio_wgs_reads	Chakraborty M et al, 2019
SRR7816671	B6_20kb_1	pacbio_wgs_reads	Chakraborty M et al, 2019
SRR7816672	B6_20kb_1	pacbio_wgs_reads	Chakraborty M et al, 2019
SRR7816673	B6_20kb_1	pacbio_wgs_reads	Chakraborty M et al, 2019
SRR7816674	B6_20kb_1	pacbio_wgs_reads	Chakraborty M et al, 2019
SRR7816675	B6_20kb_1	pacbio_wgs_reads	Chakraborty M et al, 2019
SRR7816676	B6_20kb_1	pacbio_wgs_reads	Chakraborty M et al, 2019
SRR7816677	B6_20kb_1	pacbio_wgs_reads	Chakraborty M et al, 2019
SRR7816678	B6_20kb_1	pacbio_wgs_reads	Chakraborty M et al, 2019
SRR7816679	B6_20kb_1	pacbio_wgs_reads	Chakraborty M et al, 2019
SRR7817138	ORE_20kb_1	pacbio_wgs_reads	Chakraborty M et al, 2019
SRR7817139	ORE_20kb_1	pacbio_wgs_reads	Chakraborty M et al, 2019
SRR7817140	ORE_20kb_1	pacbio_wgs_reads	Chakraborty M et al, 2019
SRR7817141	ORE_20kb_1	pacbio_wgs_reads	Chakraborty M et al, 2019
SRR7817142	ORE_20kb_1	pacbio_wgs_reads	Chakraborty M et al, 2019
SRR7817143	ORE_20kb_1	pacbio_wgs_reads	Chakraborty M et al, 2019
SRR7817144	ORE_20kb_1	pacbio_wgs_reads	Chakraborty M et al, 2019
SRR7817145	ORE_20kb_1	pacbio_wgs_reads	Chakraborty M et al, 2019
SRR7817146	ORE_20kb_1	pacbio_wgs_reads	Chakraborty M et al, 2019
SRR7817147	ORE_20kb_1	pacbio_wgs_reads	Chakraborty M et al, 2019
SRR7817148	ORE_20kb_1	pacbio_wgs_reads	Chakraborty M et al, 2019
SRR7817149	ORE_20kb_1	pacbio_wgs_reads	Chakraborty M et al, 2019
SRR7817150	ORE_20kb_1	pacbio_wgs_reads	Chakraborty M et al, 2019
SRR11906526	ISO1-F-PacBio-Sequel	pacbio_wgs_reads	Tianxiong Yu et al, 2021
SRR11906525	ISO1-F-PacBio-Sequel	pacbio_wgs_reads	Tianxiong Yu et al, 2021
