# Supplementary material for: Rapid evolution of piRNA clusters in the Drosophila melanogaster ovary
Source: HighWire-hosted journal article supplement (doi:10.1101/gr.278062.123), 2024-05-01
Supplement: Supplemental_Material.zip [file Supplementary_Table_S3.xlsx]

## Sheet: Table S3 legend
Supplementary Table S3. Post-liftOver piC coordinates in ISO1 (dm6) genome assembly from each replicate of small RNA libraries.

## Sheet: masterList
2L	2626	17335	masterList	A1	rep1
2L	2566733	2573469	masterList	A1	rep1
2L	4954178	4959612	masterList	A1	rep1
2L	4970631	4973126	masterList	A1	rep1
2L	4998000	4999500	masterList	A1	rep1
2L	6471426	6476748	masterList	A1	rep1
2L	6571807	6576500	masterList	A1	rep1
2L	7817834	7819652	masterList	A1	rep1
2L	8747500	8764500	masterList	A1	rep1
2L	9378500	9387346	masterList	A1	rep1
2L	9601765	9609754	masterList	A1	rep1
2L	9697920	9705849	masterList	A1	rep1
2L	9743924	9751930	masterList	A1	rep1
2L	9775000	9777000	masterList	A1	rep1
2L	9793500	9797000	masterList	A1	rep1
2L	10058000	10061500	masterList	A1	rep1
2L	10147000	10152224	masterList	A1	rep1
2L	10459000	10465500	masterList	A1	rep1
2L	10502091	10529304	masterList	A1	rep1
2L	10674500	10685000	masterList	A1	rep1
2L	10882398	10885560	masterList	A1	rep1
2L	11000451	11002880	masterList	A1	rep1
2L	11008000	11012412	masterList	A1	rep1
2L	11091961	11099567	masterList	A1	rep1
2L	12175889	12183426	masterList	A1	rep1
2L	12900266	12905658	masterList	A1	rep1
2L	12999500	13006500	masterList	A1	rep1
2L	13059000	13064000	masterList	A1	rep1
2L	13667043	13675585	masterList	A1	rep1
2L	13887500	13890500	masterList	A1	rep1
2L	13891500	13895500	masterList	A1	rep1
2L	14123000	14130444	masterList	A1	rep1
2L	14672500	14674500	masterList	A1	rep1
2L	18061500	18063000	masterList	A1	rep1
2L	18100000	18104000	masterList	A1	rep1
2L	18456500	18459500	masterList	A1	rep1
2L	19558000	19559500	masterList	A1	rep1
2L	19660500	19662000	masterList	A1	rep1
2L	20167533	20274108	masterList	A1	rep1
2L	20298500	20299500	masterList	A1	rep1
2L	20851000	20857433	masterList	A1	rep1
2L	21567500	21603651	masterList	A1	rep1
2L	21648000	21649000	masterList	A1	rep1
2L	22085542	22243573	masterList	A1	rep1
2L	22294500	22316000	masterList	A1	rep1
2L	22358000	22384000	masterList	A1	rep1
2L	22815014	22817378	masterList	A1	rep1
2L	22857000	22859500	masterList	A1	rep1
2L	22884691	22898000	masterList	A1	rep1
2L	23011500	23064000	masterList	A1	rep1
2L	23161000	23346500	masterList	A1	rep1
2L	23484003	23533794	masterList	A1	rep1
2R	350000	367000	masterList	A1	rep1
2R	608000	610500	masterList	A1	rep1
2R	760000	764500	masterList	A1	rep1
2R	1086514	1094000	masterList	A1	rep1
2R	1557594	1559500	masterList	A1	rep1
2R	2127000	2128500	masterList	A1	rep1
2R	2161500	2186500	masterList	A1	rep1
2R	2235565	2237000	masterList	A1	rep1
2R	2282000	2284500	masterList	A1	rep1
2R	2356870	2365311	masterList	A1	rep1
2R	2500500	2514000	masterList	A1	rep1
2R	2525000	2527677	masterList	A1	rep1
2R	2538151	2554500	masterList	A1	rep1
2R	2597000	2608000	masterList	A1	rep1
2R	2741000	2815000	masterList	A1	rep1
2R	2821621	2826000	masterList	A1	rep1
2R	2970489	3003525	masterList	A1	rep1
2R	3020960	3028497	masterList	A1	rep1
2R	3050000	3075000	masterList	A1	rep1
2R	3227000	3231500	masterList	A1	rep1
2R	3316000	3358000	masterList	A1	rep1
2R	3584000	3586000	masterList	A1	rep1
2R	3838603	3854104	masterList	A1	rep1
2R	3915144	3928000	masterList	A1	rep1
2R	4179500	4208000	masterList	A1	rep1
2R	4223031	4230509	masterList	A1	rep1
2R	4714500	4780500	masterList	A1	rep1
2R	4825151	4864000	masterList	A1	rep1
2R	4948029	4964506	masterList	A1	rep1
2R	4970646	4980772	masterList	A1	rep1
2R	4986463	5158976	masterList	A1	rep1
2R	5236485	5248318	masterList	A1	rep1
2R	5251163	5259857	masterList	A1	rep1
2R	5294603	5304500	masterList	A1	rep1
2R	6128000	6452500	masterList	A1	rep1
2R	8279080	8292500	masterList	A1	rep1
2R	8364000	8389000	masterList	A1	rep1
2R	9482311	9494938	masterList	A1	rep1
2R	12019701	12027191	masterList	A1	rep1
2R	12622716	12626433	masterList	A1	rep1
2R	12691526	12699122	masterList	A1	rep1
2R	12743449	12749844	masterList	A1	rep1
2R	13695313	13698408	masterList	A1	rep1
2R	13736388	13739201	masterList	A1	rep1
2R	14265287	14270070	masterList	A1	rep1
2R	16455500	16464000	masterList	A1	rep1
2R	16520000	16522235	masterList	A1	rep1
2R	17980500	17982500	masterList	A1	rep1
2R	17984000	17985500	masterList	A1	rep1
2R	18276658	18284418	masterList	A1	rep1
2R	21530000	21531500	masterList	A1	rep1
2R	21762500	21763500	masterList	A1	rep1
2R	21771500	21781000	masterList	A1	rep1
2R	21975855	21981680	masterList	A1	rep1
2R	22768500	22777000	masterList	A1	rep1
2R	24807243	24809546	masterList	A1	rep1
2R	25081000	25097000	masterList	A1	rep1
2R	25155000	25169888	masterList	A1	rep1
3L	295368	312336	masterList	A1	rep1
3L	1121923	1129750	masterList	A1	rep1
3L	2871595	2873000	masterList	A1	rep1
3L	2943500	2944615	masterList	A1	rep1
3L	3144840	3155523	masterList	A1	rep1
3L	3699067	3707088	masterList	A1	rep1
3L	4061634	4077974	masterList	A1	rep1
3L	5994500	5998135	masterList	A1	rep1
3L	6000500	6002049	masterList	A1	rep1
3L	6009953	6014000	masterList	A1	rep1
3L	6020401	6022570	masterList	A1	rep1
3L	7324666	7326500	masterList	A1	rep1
3L	8001000	8002043	masterList	A1	rep1
3L	8329867	8338106	masterList	A1	rep1
3L	8576000	8583513	masterList	A1	rep1
3L	8684500	8690000	masterList	A1	rep1
3L	8691000	8694000	masterList	A1	rep1
3L	8747000	8748000	masterList	A1	rep1
3L	9425947	9428128	masterList	A1	rep1
3L	10389500	10397500	masterList	A1	rep1
3L	10420000	10422500	masterList	A1	rep1
3L	11203000	11207000	masterList	A1	rep1
3L	11637751	11640386	masterList	A1	rep1
3L	11823000	11830000	masterList	A1	rep1
3L	13105527	13120000	masterList	A1	rep1
3L	13377030	13381000	masterList	A1	rep1
3L	13670144	13677254	masterList	A1	rep1
3L	13972751	13978682	masterList	A1	rep1
3L	16786823	16794762	masterList	A1	rep1
3L	18038703	18040500	masterList	A1	rep1
3L	18048500	18049937	masterList	A1	rep1
3L	18516584	18522000	masterList	A1	rep1
3L	19040500	19042500	masterList	A1	rep1
3L	19688000	19689500	masterList	A1	rep1
3L	19847000	19852000	masterList	A1	rep1
3L	20340000	20343500	masterList	A1	rep1
3L	20346000	20350000	masterList	A1	rep1
3L	20940402	20941500	masterList	A1	rep1
3L	21815488	21821132	masterList	A1	rep1
3L	23061145	23064493	masterList	A1	rep1
3L	23215500	23275023	masterList	A1	rep1
3L	23380333	23426000	masterList	A1	rep1
3L	23509616	23521797	masterList	A1	rep1
3L	23580676	23591512	masterList	A1	rep1
3L	23707000	23708000	masterList	A1	rep1
3L	24209000	24223892	masterList	A1	rep1
3L	24271096	24290971	masterList	A1	rep1
3L	24313035	24327846	masterList	A1	rep1
3L	24530973	24576664	masterList	A1	rep1
3L	24670000	24696000	masterList	A1	rep1
3L	24707000	24875000	masterList	A1	rep1
3L	24897500	24940500	masterList	A1	rep1
3L	25148415	25169389	masterList	A1	rep1
3L	25428000	25507178	masterList	A1	rep1
3L	25632443	25649000	masterList	A1	rep1
3L	25717436	25768190	masterList	A1	rep1
3L	25805500	25806500	masterList	A1	rep1
3L	25949500	25964000	masterList	A1	rep1
3L	26029500	26109000	masterList	A1	rep1
3L	26169913	26176500	masterList	A1	rep1
3L	26179612	26215433	masterList	A1	rep1
3L	26299000	26325000	masterList	A1	rep1
3L	26480000	26487471	masterList	A1	rep1
3L	26571500	26576000	masterList	A1	rep1
3L	26600500	26602500	masterList	A1	rep1
3L	26707500	26788000	masterList	A1	rep1
3L	26810277	26995966	masterList	A1	rep1
3L	27472500	27481000	masterList	A1	rep1
3L	27635000	27653296	masterList	A1	rep1
3L	27793500	27828500	masterList	A1	rep1
3L	27888225	27917893	masterList	A1	rep1
3R	32500	37500	masterList	A1	rep1
3R	490973	643494	masterList	A1	rep1
3R	644688	671000	masterList	A1	rep1
3R	688000	708000	masterList	A1	rep1
3R	709559	736000	masterList	A1	rep1
3R	770500	989493	masterList	A1	rep1
3R	1054859	1098436	masterList	A1	rep1
3R	1147286	1174504	masterList	A1	rep1
3R	1183500	1207000	masterList	A1	rep1
3R	1761984	1884001	masterList	A1	rep1
3R	2165500	2167000	masterList	A1	rep1
3R	2222000	2223760	masterList	A1	rep1
3R	2359500	2417000	masterList	A1	rep1
3R	2496500	2501000	masterList	A1	rep1
3R	2615000	2671500	masterList	A1	rep1
3R	2706985	2710500	masterList	A1	rep1
3R	2733200	2740500	masterList	A1	rep1
3R	2914166	2966000	masterList	A1	rep1
3R	3395367	3465500	masterList	A1	rep1
3R	3520200	3535525	masterList	A1	rep1
3R	3767000	3857000	masterList	A1	rep1
3R	3892500	4008000	masterList	A1	rep1
3R	4035500	4064000	masterList	A1	rep1
3R	4189000	4220291	masterList	A1	rep1
3R	4251634	4329347	masterList	A1	rep1
3R	4366508	4376265	masterList	A1	rep1
3R	4701000	4707229	masterList	A1	rep1
3R	4741020	4748000	masterList	A1	rep1
3R	4753000	4754000	masterList	A1	rep1
3R	4814000	4868500	masterList	A1	rep1
3R	5171000	5179524	masterList	A1	rep1
3R	5245500	5267500	masterList	A1	rep1
3R	6053000	6058000	masterList	A1	rep1
3R	6067000	6074343	masterList	A1	rep1
3R	6191360	6201346	masterList	A1	rep1
3R	7255500	7258500	masterList	A1	rep1
3R	7261000	7263000	masterList	A1	rep1
3R	7264500	7270508	masterList	A1	rep1
3R	9450271	9456000	masterList	A1	rep1
3R	11359144	11366640	masterList	A1	rep1
3R	11400500	11401887	masterList	A1	rep1
3R	12183106	12188997	masterList	A1	rep1
3R	12281500	12289500	masterList	A1	rep1
3R	12932000	12939000	masterList	A1	rep1
3R	13005130	13037761	masterList	A1	rep1
3R	13205000	13211857	masterList	A1	rep1
3R	13568515	13572917	masterList	A1	rep1
3R	13637500	13641000	masterList	A1	rep1
3R	13962000	13984000	masterList	A1	rep1
3R	13987431	13998226	masterList	A1	rep1
3R	14119500	14125500	masterList	A1	rep1
3R	15576000	15581500	masterList	A1	rep1
3R	17377162	17380000	masterList	A1	rep1
3R	18745155	18765089	masterList	A1	rep1
3R	19578390	19594202	masterList	A1	rep1
3R	20185000	20190164	masterList	A1	rep1
3R	20407445	20412542	masterList	A1	rep1
3R	20474000	20479000	masterList	A1	rep1
3R	21770500	21773500	masterList	A1	rep1
3R	21789685	21799652	masterList	A1	rep1
3R	22229392	22253430	masterList	A1	rep1
3R	22787500	22796000	masterList	A1	rep1
3R	22989958	22995000	masterList	A1	rep1
3R	24206500	24228006	masterList	A1	rep1
3R	25634162	25637000	masterList	A1	rep1
3R	26026000	26029000	masterList	A1	rep1
3R	26745472	26754852	masterList	A1	rep1
3R	27501767	27516424	masterList	A1	rep1
3R	27979000	27981822	masterList	A1	rep1
3R	29161000	29168613	masterList	A1	rep1
3R	29223000	29230000	masterList	A1	rep1
3R	30845021	30862300	masterList	A1	rep1
3R	30953500	30959500	masterList	A1	rep1
3R	31350081	31360634	masterList	A1	rep1
3R	31695803	31699482	masterList	A1	rep1
3R	32056542	32087028	masterList	A1	rep1
3R	32208761	32210273	masterList	A1	rep1
3R	32493318	32509733	masterList	A1	rep1
4	107500	114797	masterList	A1	rep1
4	116204	124420	masterList	A1	rep1
4	133106	147192	masterList	A1	rep1
4	147823	150000	masterList	A1	rep1
4	182309	186695	masterList	A1	rep1
4	195867	205206	masterList	A1	rep1
4	516934	545105	masterList	A1	rep1
4	589446	598394	masterList	A1	rep1
4	677742	688270	masterList	A1	rep1
4	799005	807500	masterList	A1	rep1
4	924369	934345	masterList	A1	rep1
4	991377	1054291	masterList	A1	rep1
4	1071927	1076918	masterList	A1	rep1
4	1281000	1306327	masterList	A1	rep1
U_10	0	2000	masterList	A1	rep1
U_11	19000	32500	masterList	A1	rep1
U_17	5000	24000	masterList	A1	rep1
U_21	0	18500	masterList	A1	rep1
U_24	56000	61000	masterList	A1	rep1
U_25	58500	61000	masterList	A1	rep1
U_27	4000	11000	masterList	A1	rep1
U_32	7500	18500	masterList	A1	rep1
U_42	500	12500	masterList	A1	rep1
U_47	16500	29500	masterList	A1	rep1
U_48	97500	99000	masterList	A1	rep1
U_49	0	1500	masterList	A1	rep1
U_5	5500	22500	masterList	A1	rep1
U_51	2000	8000	masterList	A1	rep1
U_59	90500	105500	masterList	A1	rep1
U_65	0	1500	masterList	A1	rep1
U_66	0	2500	masterList	A1	rep1
U_69	500	4000	masterList	A1	rep1
U_7	35500	44392	masterList	A1	rep1
X	867500	874000	masterList	A1	rep1
X	875000	878000	masterList	A1	rep1
X	1230726	1234500	masterList	A1	rep1
X	1362500	1363710	masterList	A1	rep1
X	3184000	3199914	masterList	A1	rep1
X	3908692	3913417	masterList	A1	rep1
X	4026000	4027500	masterList	A1	rep1
X	4031527	4033000	masterList	A1	rep1
X	5728857	5735316	masterList	A1	rep1
X	7140000	7143760	masterList	A1	rep1
X	7268500	7269744	masterList	A1	rep1
X	7738759	7746294	masterList	A1	rep1
X	8059525	8071635	masterList	A1	rep1
X	8346000	8405000	masterList	A1	rep1
X	9054500	9063241	masterList	A1	rep1
X	9367010	9372000	masterList	A1	rep1
X	9470745	9479232	masterList	A1	rep1
X	9693500	9697500	masterList	A1	rep1
X	9966000	9970500	masterList	A1	rep1
X	10025630	10030086	masterList	A1	rep1
X	10643260	10646878	masterList	A1	rep1
X	10673266	10693908	masterList	A1	rep1
X	11048557	11052509	masterList	A1	rep1
X	12055034	12060566	masterList	A1	rep1
X	12638879	12656640	masterList	A1	rep1
X	13393334	13398514	masterList	A1	rep1
X	13681000	13683500	masterList	A1	rep1
X	14088111	14104795	masterList	A1	rep1
X	14173146	14195212	masterList	A1	rep1
X	15066407	15070437	masterList	A1	rep1
X	15132497	15136103	masterList	A1	rep1
X	17061613	17071500	masterList	A1	rep1
X	17093000	17098500	masterList	A1	rep1
X	17789694	17796803	masterList	A1	rep1
X	18038500	18042500	masterList	A1	rep1
X	20020000	20021315	masterList	A1	rep1
X	21487500	21521621	masterList	A1	rep1
X	21573500	21797500	masterList	A1	rep1
X	21814500	21818500	masterList	A1	rep1
X	21848000	22013500	masterList	A1	rep1
X	22096500	22293365	masterList	A1	rep1
X	22458500	22471500	masterList	A1	rep1
X	22492500	22506500	masterList	A1	rep1
X	22511000	22513500	masterList	A1	rep1
X	23039652	23144426	masterList	A1	rep1
X	23546000	23610000	masterList	A1	rep1
X	23842500	23853000	masterList	A1	rep1
2L	2626	17335	masterList	A1	rep2
2L	2567015	2573035	masterList	A1	rep2
2L	4954178	4959612	masterList	A1	rep2
2L	4970631	4973126	masterList	A1	rep2
2L	4998000	4999500	masterList	A1	rep2
2L	6471430	6478000	masterList	A1	rep2
2L	6571807	6576500	masterList	A1	rep2
2L	7817834	7819652	masterList	A1	rep2
2L	8747500	8750000	masterList	A1	rep2
2L	8755000	8758500	masterList	A1	rep2
2L	8760000	8763000	masterList	A1	rep2
2L	9378500	9387346	masterList	A1	rep2
2L	9601765	9609754	masterList	A1	rep2
2L	9697749	9705790	masterList	A1	rep2
2L	9744102	9751682	masterList	A1	rep2
2L	9775000	9777000	masterList	A1	rep2
2L	9793500	9797000	masterList	A1	rep2
2L	10059000	10061500	masterList	A1	rep2
2L	10147000	10152528	masterList	A1	rep2
2L	10459000	10465500	masterList	A1	rep2
2L	10502095	10529307	masterList	A1	rep2
2L	10674500	10685000	masterList	A1	rep2
2L	10882398	10885560	masterList	A1	rep2
2L	11000451	11002880	masterList	A1	rep2
2L	11008000	11012412	masterList	A1	rep2
2L	11091959	11099465	masterList	A1	rep2
2L	12175891	12183428	masterList	A1	rep2
2L	12900267	12905660	masterList	A1	rep2
2L	12999500	13004000	masterList	A1	rep2
2L	13059000	13064000	masterList	A1	rep2
2L	13667037	13676000	masterList	A1	rep2
2L	13887500	13890500	masterList	A1	rep2
2L	13891500	13895500	masterList	A1	rep2
2L	14123000	14130443	masterList	A1	rep2
2L	14672500	14674500	masterList	A1	rep2
2L	18061500	18063000	masterList	A1	rep2
2L	18100000	18104000	masterList	A1	rep2
2L	18456500	18459000	masterList	A1	rep2
2L	19555500	19559500	masterList	A1	rep2
2L	19660500	19662000	masterList	A1	rep2
2L	20167533	20274108	masterList	A1	rep2
2L	20851000	20857433	masterList	A1	rep2
2L	21567500	21583659	masterList	A1	rep2
2L	21588561	21603651	masterList	A1	rep2
2L	21648000	21649000	masterList	A1	rep2
2L	22085542	22243573	masterList	A1	rep2
2L	22294500	22316000	masterList	A1	rep2
2L	22356500	22383000	masterList	A1	rep2
2L	22815014	22817378	masterList	A1	rep2
2L	22857000	22859500	masterList	A1	rep2
2L	22884691	22898000	masterList	A1	rep2
2L	23011500	23064500	masterList	A1	rep2
2L	23161000	23345500	masterList	A1	rep2
2L	23484003	23533794	masterList	A1	rep2
2R	350000	367000	masterList	A1	rep2
2R	608000	610500	masterList	A1	rep2
2R	760000	762000	masterList	A1	rep2
2R	1086551	1094000	masterList	A1	rep2
2R	1557594	1559500	masterList	A1	rep2
2R	1671000	1672000	masterList	A1	rep2
2R	2127000	2128500	masterList	A1	rep2
2R	2161500	2187000	masterList	A1	rep2
2R	2235500	2237000	masterList	A1	rep2
2R	2282000	2284500	masterList	A1	rep2
2R	2356870	2363700	masterList	A1	rep2
2R	2500500	2514000	masterList	A1	rep2
2R	2525000	2554500	masterList	A1	rep2
2R	2597000	2610500	masterList	A1	rep2
2R	2740500	2821718	masterList	A1	rep2
2R	2970242	3003319	masterList	A1	rep2
2R	3019908	3027041	masterList	A1	rep2
2R	3049500	3056500	masterList	A1	rep2
2R	3227000	3231500	masterList	A1	rep2
2R	3316000	3356500	masterList	A1	rep2
2R	3584000	3586000	masterList	A1	rep2
2R	3838603	3854104	masterList	A1	rep2
2R	3915144	3928000	masterList	A1	rep2
2R	4178500	4243000	masterList	A1	rep2
2R	4714500	4864000	masterList	A1	rep2
2R	4948029	4964506	masterList	A1	rep2
2R	4970646	4984284	masterList	A1	rep2
2R	4986463	5158976	masterList	A1	rep2
2R	5236485	5248318	masterList	A1	rep2
2R	5253510	5265557	masterList	A1	rep2
2R	5293947	5304500	masterList	A1	rep2
2R	6149500	6458500	masterList	A1	rep2
2R	8279080	8292228	masterList	A1	rep2
2R	8364229	8388803	masterList	A1	rep2
2R	9482311	9494938	masterList	A1	rep2
2R	12019706	12027193	masterList	A1	rep2
2R	12621755	12627382	masterList	A1	rep2
2R	12691526	12699122	masterList	A1	rep2
2R	12743453	12749839	masterList	A1	rep2
2R	13695313	13698408	masterList	A1	rep2
2R	13736388	13739201	masterList	A1	rep2
2R	14265287	14270070	masterList	A1	rep2
2R	16459000	16463500	masterList	A1	rep2
2R	16520154	16522235	masterList	A1	rep2
2R	17980500	17982500	masterList	A1	rep2
2R	17984000	17985500	masterList	A1	rep2
2R	18276658	18284418	masterList	A1	rep2
2R	21771500	21782500	masterList	A1	rep2
2R	21975859	21981678	masterList	A1	rep2
2R	22769500	22777000	masterList	A1	rep2
2R	24807243	24809546	masterList	A1	rep2
2R	25084500	25097000	masterList	A1	rep2
2R	25155000	25169888	masterList	A1	rep2
3L	295368	312242	masterList	A1	rep2
3L	1121923	1129750	masterList	A1	rep2
3L	3144840	3155523	masterList	A1	rep2
3L	3699070	3707016	masterList	A1	rep2
3L	4061634	4077974	masterList	A1	rep2
3L	5994594	5998135	masterList	A1	rep2
3L	6000653	6002049	masterList	A1	rep2
3L	6009953	6013843	masterList	A1	rep2
3L	6020401	6022570	masterList	A1	rep2
3L	7324666	7326500	masterList	A1	rep2
3L	8329936	8338106	masterList	A1	rep2
3L	8576600	8583513	masterList	A1	rep2
3L	8683500	8693000	masterList	A1	rep2
3L	8747000	8748000	masterList	A1	rep2
3L	9425947	9428128	masterList	A1	rep2
3L	10395500	10397000	masterList	A1	rep2
3L	10420500	10422500	masterList	A1	rep2
3L	11203000	11206500	masterList	A1	rep2
3L	11637751	11640386	masterList	A1	rep2
3L	11823117	11829248	masterList	A1	rep2
3L	13105527	13120000	masterList	A1	rep2
3L	13377030	13380172	masterList	A1	rep2
3L	13670143	13677245	masterList	A1	rep2
3L	13972791	13978680	masterList	A1	rep2
3L	16786823	16794762	masterList	A1	rep2
3L	18516720	18521901	masterList	A1	rep2
3L	19040500	19042500	masterList	A1	rep2
3L	19688000	19690000	masterList	A1	rep2
3L	19847000	19852000	masterList	A1	rep2
3L	20340000	20343500	masterList	A1	rep2
3L	20346000	20350000	masterList	A1	rep2
3L	21815488	21821132	masterList	A1	rep2
3L	23061145	23064493	masterList	A1	rep2
3L	23215500	23260500	masterList	A1	rep2
3L	23380333	23422439	masterList	A1	rep2
3L	23509616	23521797	masterList	A1	rep2
3L	23580676	23591512	masterList	A1	rep2
3L	23707000	23708000	masterList	A1	rep2
3L	24209000	24223892	masterList	A1	rep2
3L	24271096	24290971	masterList	A1	rep2
3L	24313035	24327846	masterList	A1	rep2
3L	24530973	24576664	masterList	A1	rep2
3L	24670000	24696000	masterList	A1	rep2
3L	24707500	24876000	masterList	A1	rep2
3L	24897500	24937500	masterList	A1	rep2
3L	25148415	25169389	masterList	A1	rep2
3L	25439306	25507178	masterList	A1	rep2
3L	25632564	25652000	masterList	A1	rep2
3L	25695500	25762678	masterList	A1	rep2
3L	25949500	25964000	masterList	A1	rep2
3L	26030939	26043028	masterList	A1	rep2
3L	26046000	26129000	masterList	A1	rep2
3L	26169913	26219000	masterList	A1	rep2
3L	26299000	26325000	masterList	A1	rep2
3L	26480000	26488305	masterList	A1	rep2
3L	26571500	26576000	masterList	A1	rep2
3L	26600500	26602500	masterList	A1	rep2
3L	26711500	26746000	masterList	A1	rep2
3L	26810277	26997000	masterList	A1	rep2
3L	27335174	27336500	masterList	A1	rep2
3L	27472500	27481000	masterList	A1	rep2
3L	27635000	27653623	masterList	A1	rep2
3L	27745500	27828000	masterList	A1	rep2
3L	27888225	27917893	masterList	A1	rep2
3R	32500	37500	masterList	A1	rep2
3R	490973	643494	masterList	A1	rep2
3R	644688	671000	masterList	A1	rep2
3R	688000	736000	masterList	A1	rep2
3R	770500	989493	masterList	A1	rep2
3R	1054500	1098436	masterList	A1	rep2
3R	1147286	1174504	masterList	A1	rep2
3R	1183500	1192000	masterList	A1	rep2
3R	1761984	1884001	masterList	A1	rep2
3R	2165500	2167000	masterList	A1	rep2
3R	2222000	2223760	masterList	A1	rep2
3R	2356000	2412500	masterList	A1	rep2
3R	2496500	2501000	masterList	A1	rep2
3R	2614000	2710500	masterList	A1	rep2
3R	2731500	2740500	masterList	A1	rep2
3R	2914166	2966000	masterList	A1	rep2
3R	2971000	2974568	masterList	A1	rep2
3R	3394500	3465500	masterList	A1	rep2
3R	3520200	3537500	masterList	A1	rep2
3R	3757500	3857000	masterList	A1	rep2
3R	3892500	4008000	masterList	A1	rep2
3R	4035500	4064000	masterList	A1	rep2
3R	4189500	4190636	masterList	A1	rep2
3R	4250000	4328450	masterList	A1	rep2
3R	4366508	4376265	masterList	A1	rep2
3R	4701000	4707225	masterList	A1	rep2
3R	4741020	4747041	masterList	A1	rep2
3R	4823000	4824000	masterList	A1	rep2
3R	4825500	4831000	masterList	A1	rep2
3R	5171000	5179532	masterList	A1	rep2
3R	5245000	5277000	masterList	A1	rep2
3R	6053000	6058000	masterList	A1	rep2
3R	6191360	6201346	masterList	A1	rep2
3R	7255500	7258500	masterList	A1	rep2
3R	7261000	7263000	masterList	A1	rep2
3R	7264576	7270508	masterList	A1	rep2
3R	9450285	9455750	masterList	A1	rep2
3R	11359142	11366640	masterList	A1	rep2
3R	11400500	11401887	masterList	A1	rep2
3R	12183000	12189672	masterList	A1	rep2
3R	12281500	12289500	masterList	A1	rep2
3R	12932000	12936500	masterList	A1	rep2
3R	13004343	13037761	masterList	A1	rep2
3R	13205000	13211857	masterList	A1	rep2
3R	13568516	13574000	masterList	A1	rep2
3R	13636500	13641000	masterList	A1	rep2
3R	13964663	13982251	masterList	A1	rep2
3R	13987431	13998226	masterList	A1	rep2
3R	14119500	14125500	masterList	A1	rep2
3R	15579000	15581500	masterList	A1	rep2
3R	17378305	17380500	masterList	A1	rep2
3R	18745155	18765089	masterList	A1	rep2
3R	19578390	19594202	masterList	A1	rep2
3R	20185000	20190150	masterList	A1	rep2
3R	20407446	20412776	masterList	A1	rep2
3R	20474000	20479000	masterList	A1	rep2
3R	21770500	21773500	masterList	A1	rep2
3R	21789685	21799652	masterList	A1	rep2
3R	22229392	22253430	masterList	A1	rep2
3R	22787500	22794000	masterList	A1	rep2
3R	22989958	22995000	masterList	A1	rep2
3R	24207486	24228006	masterList	A1	rep2
3R	25634162	25637000	masterList	A1	rep2
3R	26026500	26027500	masterList	A1	rep2
3R	26745472	26754852	masterList	A1	rep2
3R	27501767	27516424	masterList	A1	rep2
3R	27979000	27981819	masterList	A1	rep2
3R	29161000	29168618	masterList	A1	rep2
3R	29223790	29230000	masterList	A1	rep2
3R	30845021	30852599	masterList	A1	rep2
3R	30852919	30862300	masterList	A1	rep2
3R	30956000	30959500	masterList	A1	rep2
3R	31350081	31360634	masterList	A1	rep2
3R	31695803	31699482	masterList	A1	rep2
3R	32056542	32087028	masterList	A1	rep2
3R	32208761	32210273	masterList	A1	rep2
3R	32493318	32509733	masterList	A1	rep2
4	107500	150000	masterList	A1	rep2
4	182309	186695	masterList	A1	rep2
4	195867	205206	masterList	A1	rep2
4	516934	545105	masterList	A1	rep2
4	589004	598394	masterList	A1	rep2
4	677742	688245	masterList	A1	rep2
4	799154	807500	masterList	A1	rep2
4	924369	934345	masterList	A1	rep2
4	981000	1064500	masterList	A1	rep2
4	1071927	1076918	masterList	A1	rep2
4	1277000	1306327	masterList	A1	rep2
U_10	0	2000	masterList	A1	rep2
U_11	19000	32500	masterList	A1	rep2
U_17	5000	24500	masterList	A1	rep2
U_21	0	18500	masterList	A1	rep2
U_24	56000	61000	masterList	A1	rep2
U_25	58500	61000	masterList	A1	rep2
U_27	4000	11000	masterList	A1	rep2
U_32	7500	18500	masterList	A1	rep2
U_42	500	12500	masterList	A1	rep2
U_47	12500	29500	masterList	A1	rep2
U_48	97500	99000	masterList	A1	rep2
U_49	0	1500	masterList	A1	rep2
U_5	5500	22500	masterList	A1	rep2
U_51	2000	8000	masterList	A1	rep2
U_59	26500	27500	masterList	A1	rep2
U_59	90500	105500	masterList	A1	rep2
U_65	0	1500	masterList	A1	rep2
U_66	0	5000	masterList	A1	rep2
U_69	500	4000	masterList	A1	rep2
U_7	36000	44393	masterList	A1	rep2
X	867500	874000	masterList	A1	rep2
X	875000	878000	masterList	A1	rep2
X	1230726	1234500	masterList	A1	rep2
X	3184000	3199914	masterList	A1	rep2
X	3908692	3913417	masterList	A1	rep2
X	4026000	4032900	masterList	A1	rep2
X	5728857	5735316	masterList	A1	rep2
X	6270063	6271500	masterList	A1	rep2
X	7140000	7143760	masterList	A1	rep2
X	7738759	7746294	masterList	A1	rep2
X	8059525	8071635	masterList	A1	rep2
X	8346654	8378138	masterList	A1	rep2
X	9054500	9063241	masterList	A1	rep2
X	9367043	9372000	masterList	A1	rep2
X	9470745	9479162	masterList	A1	rep2
X	9695000	9697000	masterList	A1	rep2
X	9966000	9970500	masterList	A1	rep2
X	10025630	10030086	masterList	A1	rep2
X	10643260	10646878	masterList	A1	rep2
X	10673266	10693908	masterList	A1	rep2
X	11048557	11052509	masterList	A1	rep2
X	12055038	12060566	masterList	A1	rep2
X	12638879	12656640	masterList	A1	rep2
X	13393348	13399749	masterList	A1	rep2
X	13681000	13683500	masterList	A1	rep2
X	14088111	14104795	masterList	A1	rep2
X	14173146	14195212	masterList	A1	rep2
X	15066407	15070434	masterList	A1	rep2
X	15131000	15136104	masterList	A1	rep2
X	17061613	17071500	masterList	A1	rep2
X	17093000	17098500	masterList	A1	rep2
X	17789933	17797788	masterList	A1	rep2
X	18038500	18040500	masterList	A1	rep2
X	21488905	21521580	masterList	A1	rep2
X	21591000	21797500	masterList	A1	rep2
X	21814500	21818500	masterList	A1	rep2
X	21847500	22013500	masterList	A1	rep2
X	22096500	22293365	masterList	A1	rep2
X	22458500	22471500	masterList	A1	rep2
X	22492500	22512000	masterList	A1	rep2
X	23038500	23144426	masterList	A1	rep2
X	23549000	23575000	masterList	A1	rep2
X	23579620	23584541	masterList	A1	rep2
X	23593500	23610000	masterList	A1	rep2
X	23842500	23859500	masterList	A1	rep2
2L	27500	49000	masterList	A2	rep1
2L	126333	133544	masterList	A2	rep1
2L	994556	1008222	masterList	A2	rep1
2L	1513500	1520000	masterList	A2	rep1
2L	1742458	1744725	masterList	A2	rep1
2L	2905500	2907500	masterList	A2	rep1
2L	6039609	6043685	masterList	A2	rep1
2L	7165502	7175254	masterList	A2	rep1
2L	7882329	7889000	masterList	A2	rep1
2L	9222000	9223500	masterList	A2	rep1
2L	9449000	9451904	masterList	A2	rep1
2L	9822500	9831000	masterList	A2	rep1
2L	10107500	10110000	masterList	A2	rep1
2L	10189212	10194438	masterList	A2	rep1
2L	12088152	12102344	masterList	A2	rep1
2L	12259000	12264000	masterList	A2	rep1
2L	13046000	13047500	masterList	A2	rep1
2L	13623400	13628383	masterList	A2	rep1
2L	14465664	14476500	masterList	A2	rep1
2L	17173637	17179789	masterList	A2	rep1
2L	17423400	17427115	masterList	A2	rep1
2L	17651077	17656188	masterList	A2	rep1
2L	17996000	17997500	masterList	A2	rep1
2L	18084592	18090059	masterList	A2	rep1
2L	18640000	18641000	masterList	A2	rep1
2L	18841506	18848000	masterList	A2	rep1
2L	19191000	19196500	masterList	A2	rep1
2L	19487000	19488500	masterList	A2	rep1
2L	19505613	19509437	masterList	A2	rep1
2L	19527000	19537500	masterList	A2	rep1
2L	19593000	19594500	masterList	A2	rep1
2L	19751471	19759580	masterList	A2	rep1
2L	19845305	19852000	masterList	A2	rep1
2L	20107000	20126955	masterList	A2	rep1
2L	20153606	20215368	masterList	A2	rep1
2L	20276440	20281063	masterList	A2	rep1
2L	20371000	20375715	masterList	A2	rep1
2L	21563500	21568000	masterList	A2	rep1
2L	22016000	22019500	masterList	A2	rep1
2L	22067464	22169205	masterList	A2	rep1
2L	22273500	22282794	masterList	A2	rep1
2L	22574847	22579921	masterList	A2	rep1
2L	22590450	22595622	masterList	A2	rep1
2L	22845620	22849071	masterList	A2	rep1
2L	22853500	22863717	masterList	A2	rep1
2L	22953304	22959500	masterList	A2	rep1
2L	23071500	23096433	masterList	A2	rep1
2L	23099848	23115773	masterList	A2	rep1
2L	23117316	23136000	masterList	A2	rep1
2L	23207000	23282000	masterList	A2	rep1
2L	23297500	23354169	masterList	A2	rep1
2L	23373873	23390000	masterList	A2	rep1
2R	127713	129000	masterList	A2	rep1
2R	179500	195500	masterList	A2	rep1
2R	474000	475500	masterList	A2	rep1
2R	1056000	1071000	masterList	A2	rep1
2R	1203535	1238316	masterList	A2	rep1
2R	1621998	1707864	masterList	A2	rep1
2R	1725500	1759036	masterList	A2	rep1
2R	1839852	1868500	masterList	A2	rep1
2R	2006000	2024500	masterList	A2	rep1
2R	2238500	2246197	masterList	A2	rep1
2R	2252500	2261974	masterList	A2	rep1
2R	2270423	2295655	masterList	A2	rep1
2R	2306252	2359500	masterList	A2	rep1
2R	2384000	2388933	masterList	A2	rep1
2R	2393081	2422683	masterList	A2	rep1
2R	2424587	2425000	masterList	A2	rep1
2R	2511500	2626500	masterList	A2	rep1
2R	2725500	2826550	masterList	A2	rep1
2R	2832495	2842176	masterList	A2	rep1
2R	2862332	2884500	masterList	A2	rep1
2R	3022716	3068367	masterList	A2	rep1
2R	3140000	3162500	masterList	A2	rep1
2R	3174000	3191500	masterList	A2	rep1
2R	3650000	3652000	masterList	A2	rep1
2R	3710000	3712000	masterList	A2	rep1
2R	3758500	3904430	masterList	A2	rep1
2R	3918500	3975500	masterList	A2	rep1
2R	4080000	4085500	masterList	A2	rep1
2R	4269500	4271000	masterList	A2	rep1
2R	4293500	4311369	masterList	A2	rep1
2R	4428000	4566500	masterList	A2	rep1
2R	4588220	4621258	masterList	A2	rep1
2R	4634487	4660440	masterList	A2	rep1
2R	4687464	4705806	masterList	A2	rep1
2R	4727533	4734669	masterList	A2	rep1
2R	4741500	4804174	masterList	A2	rep1
2R	4807133	4819500	masterList	A2	rep1
2R	4985928	4991104	masterList	A2	rep1
2R	5796438	6070924	masterList	A2	rep1
2R	6364989	6366000	masterList	A2	rep1
2R	7213500	7214500	masterList	A2	rep1
2R	7985500	7987500	masterList	A2	rep1
2R	8634500	8637500	masterList	A2	rep1
2R	8717426	8720000	masterList	A2	rep1
2R	9380008	9387500	masterList	A2	rep1
2R	10473000	10480086	masterList	A2	rep1
2R	12246629	12257693	masterList	A2	rep1
2R	13736876	13750152	masterList	A2	rep1
2R	13845471	13848171	masterList	A2	rep1
2R	16561331	16564896	masterList	A2	rep1
2R	17642000	17644500	masterList	A2	rep1
2R	18922560	18924012	masterList	A2	rep1
2R	19220585	19222798	masterList	A2	rep1
2R	19909144	19912205	masterList	A2	rep1
2R	20580500	20582000	masterList	A2	rep1
2R	20687000	20690000	masterList	A2	rep1
2R	22102580	22104030	masterList	A2	rep1
2R	22263500	22271816	masterList	A2	rep1
2R	22399417	22401730	masterList	A2	rep1
2R	23526755	23528486	masterList	A2	rep1
2R	24686500	24715500	masterList	A2	rep1
3L	544679	547739	masterList	A2	rep1
3L	3115960	3122804	masterList	A2	rep1
3L	4639588	4643815	masterList	A2	rep1
3L	5490554	5493500	masterList	A2	rep1
3L	5642000	5644500	masterList	A2	rep1
3L	5959000	5965719	masterList	A2	rep1
3L	6512500	6515358	masterList	A2	rep1
3L	8153397	8157521	masterList	A2	rep1
3L	8613449	8620315	masterList	A2	rep1
3L	8872416	8877329	masterList	A2	rep1
3L	9354941	9357937	masterList	A2	rep1
3L	9977000	9982000	masterList	A2	rep1
3L	11565351	11568258	masterList	A2	rep1
3L	13275500	13276500	masterList	A2	rep1
3L	15611297	15618302	masterList	A2	rep1
3L	16638000	16650003	masterList	A2	rep1
3L	17864186	17869605	masterList	A2	rep1
3L	18341000	18346000	masterList	A2	rep1
3L	18745136	18752820	masterList	A2	rep1
3L	19030225	19033693	masterList	A2	rep1
3L	19439500	19441000	masterList	A2	rep1
3L	19509500	19512000	masterList	A2	rep1
3L	19629500	19637000	masterList	A2	rep1
3L	21234067	21239255	masterList	A2	rep1
3L	21574500	21577500	masterList	A2	rep1
3L	21582340	21589000	masterList	A2	rep1
3L	22152500	22159500	masterList	A2	rep1
3L	22817573	22825274	masterList	A2	rep1
3L	22994720	23039906	masterList	A2	rep1
3L	23191000	23202000	masterList	A2	rep1
3L	23394000	23415500	masterList	A2	rep1
3L	23501000	23519500	masterList	A2	rep1
3L	23659582	23664000	masterList	A2	rep1
3L	23842500	23846288	masterList	A2	rep1
3L	24369000	24370500	masterList	A2	rep1
3L	24575500	24597500	masterList	A2	rep1
3L	24804500	24824500	masterList	A2	rep1
3L	24841000	24843000	masterList	A2	rep1
3L	25082575	25095285	masterList	A2	rep1
3L	25171381	25218500	masterList	A2	rep1
3L	25258883	25325000	masterList	A2	rep1
3L	25335500	25349000	masterList	A2	rep1
3L	25374500	25452500	masterList	A2	rep1
3L	25484156	25533500	masterList	A2	rep1
3L	25563500	25566500	masterList	A2	rep1
3L	25594500	25595500	masterList	A2	rep1
3L	25687251	25689727	masterList	A2	rep1
3L	25695145	25699375	masterList	A2	rep1
3L	25705695	25709260	masterList	A2	rep1
3L	25715058	25721143	masterList	A2	rep1
3L	25872000	25883442	masterList	A2	rep1
3L	25887862	25902500	masterList	A2	rep1
3L	25938000	25945500	masterList	A2	rep1
3L	25963000	25970000	masterList	A2	rep1
3L	25985000	26015500	masterList	A2	rep1
3L	26141000	26142000	masterList	A2	rep1
3L	26149000	26152000	masterList	A2	rep1
3L	26161000	26164000	masterList	A2	rep1
3L	26186000	26195162	masterList	A2	rep1
3L	26200533	26234500	masterList	A2	rep1
3L	26750500	26754500	masterList	A2	rep1
3L	26807000	26817500	masterList	A2	rep1
3L	26844000	26851000	masterList	A2	rep1
3L	26858602	26934815	masterList	A2	rep1
3L	27504500	27508542	masterList	A2	rep1
3L	27512273	27528317	masterList	A2	rep1
3L	27530848	27534000	masterList	A2	rep1
3L	27539246	27541500	masterList	A2	rep1
3L	27619199	27634919	masterList	A2	rep1
3L	27642120	27653354	masterList	A2	rep1
3L	27659403	27729917	masterList	A2	rep1
3L	27787104	27798835	masterList	A2	rep1
3L	27821564	27837220	masterList	A2	rep1
3L	27853158	27861000	masterList	A2	rep1
3L	27863012	27865000	masterList	A2	rep1
3L	28339000	28340000	masterList	A2	rep1
3L	28941500	28948500	masterList	A2	rep1
3R	65905	67500	masterList	A2	rep1
3R	303500	312000	masterList	A2	rep1
3R	508000	520813	masterList	A2	rep1
3R	523270	530910	masterList	A2	rep1
3R	534500	599454	masterList	A2	rep1
3R	614500	618000	masterList	A2	rep1
3R	847301	1068000	masterList	A2	rep1
3R	1189000	1192000	masterList	A2	rep1
3R	1529500	1561000	masterList	A2	rep1
3R	1852000	1887373	masterList	A2	rep1
3R	2212500	2215000	masterList	A2	rep1
3R	2399500	2400500	masterList	A2	rep1
3R	2417000	2418500	masterList	A2	rep1
3R	2429500	2432000	masterList	A2	rep1
3R	2494500	2520000	masterList	A2	rep1
3R	2626000	2658000	masterList	A2	rep1
3R	2670000	2706500	masterList	A2	rep1
3R	2729000	2787000	masterList	A2	rep1
3R	3076271	3086007	masterList	A2	rep1
3R	3249500	3254500	masterList	A2	rep1
3R	3317500	3326918	masterList	A2	rep1
3R	3347500	3379500	masterList	A2	rep1
3R	3757500	3788628	masterList	A2	rep1
3R	3797014	3825921	masterList	A2	rep1
3R	3848415	3903488	masterList	A2	rep1
3R	3911945	3924000	masterList	A2	rep1
3R	3996000	4022506	masterList	A2	rep1
3R	4112000	4134500	masterList	A2	rep1
3R	4184408	4242017	masterList	A2	rep1
3R	4609000	4613363	masterList	A2	rep1
3R	6167000	6177308	masterList	A2	rep1
3R	7249500	7253000	masterList	A2	rep1
3R	7255500	7257500	masterList	A2	rep1
3R	7259000	7261500	masterList	A2	rep1
3R	7263500	7264500	masterList	A2	rep1
3R	7719805	7726810	masterList	A2	rep1
3R	8100500	8102000	masterList	A2	rep1
3R	8817000	8826000	masterList	A2	rep1
3R	8992909	9003152	masterList	A2	rep1
3R	9780500	9782000	masterList	A2	rep1
3R	9814148	9819648	masterList	A2	rep1
3R	10619748	10624000	masterList	A2	rep1
3R	11356500	11358500	masterList	A2	rep1
3R	12676000	12693000	masterList	A2	rep1
3R	12809000	12813500	masterList	A2	rep1
3R	13689000	13690993	masterList	A2	rep1
3R	13788284	13793749	masterList	A2	rep1
3R	13824711	13832714	masterList	A2	rep1
3R	13926484	13934000	masterList	A2	rep1
3R	13981000	13984500	masterList	A2	rep1
3R	14292000	14293500	masterList	A2	rep1
3R	14755000	14759404	masterList	A2	rep1
3R	15394937	15407516	masterList	A2	rep1
3R	15427000	15428000	masterList	A2	rep1
3R	15429000	15432000	masterList	A2	rep1
3R	17031000	17037439	masterList	A2	rep1
3R	18919500	18921770	masterList	A2	rep1
3R	19113500	19115500	masterList	A2	rep1
3R	21439059	21454000	masterList	A2	rep1
3R	27517000	27518000	masterList	A2	rep1
3R	29298000	29301384	masterList	A2	rep1
3R	30844000	30845500	masterList	A2	rep1
3R	31254000	31270000	masterList	A2	rep1
3R	32177500	32184500	masterList	A2	rep1
4	31000	35068	masterList	A2	rep1
4	99500	112441	masterList	A2	rep1
4	122500	138500	masterList	A2	rep1
4	528031	538270	masterList	A2	rep1
4	577841	584734	masterList	A2	rep1
4	590535	597445	masterList	A2	rep1
4	665500	677522	masterList	A2	rep1
4	757889	794512	masterList	A2	rep1
4	929000	1013000	masterList	A2	rep1
4	1129000	1130000	masterList	A2	rep1
4	1191500	1199912	masterList	A2	rep1
4	1459500	1473000	masterList	A2	rep1
4	1522556	1568000	masterList	A2	rep1
U_0	46826	54661	masterList	A2	rep1
U_105	6500	32901	masterList	A2	rep1
U_106	11500	18500	masterList	A2	rep1
U_108	12000	26000	masterList	A2	rep1
U_111	13000	19792	masterList	A2	rep1
U_116	32000	33000	masterList	A2	rep1
U_122	13803	48488	masterList	A2	rep1
U_13	458	1559	masterList	A2	rep1
U_130	15626	22630	masterList	A2	rep1
U_139	19500	22500	masterList	A2	rep1
U_143	53000	54000	masterList	A2	rep1
U_145	19350	23518	masterList	A2	rep1
U_154	79500	109500	masterList	A2	rep1
U_159	29000	38500	masterList	A2	rep1
U_23	23	15500	masterList	A2	rep1
U_26	3	83665	masterList	A2	rep1
U_33	67500	68500	masterList	A2	rep1
U_42	31500	36500	masterList	A2	rep1
U_46	46	53968	masterList	A2	rep1
U_51	31869	37369	masterList	A2	rep1
U_62	52500	56500	masterList	A2	rep1
U_7	1	7919	masterList	A2	rep1
U_7	13206	24000	masterList	A2	rep1
U_75	56221	63634	masterList	A2	rep1
U_8	2500	33500	masterList	A2	rep1
U_80	22000	25000	masterList	A2	rep1
U_81	18500	19500	masterList	A2	rep1
U_89	13500	15000	masterList	A2	rep1
U_92	10203	17884	masterList	A2	rep1
X	867814	869000	masterList	A2	rep1
X	870500	873000	masterList	A2	rep1
X	1370000	1376000	masterList	A2	rep1
X	2048500	2069012	masterList	A2	rep1
X	2081693	2097760	masterList	A2	rep1
X	2105793	2116500	masterList	A2	rep1
X	3148150	3153128	masterList	A2	rep1
X	3302500	3303500	masterList	A2	rep1
X	3952500	3953785	masterList	A2	rep1
X	3957636	3959500	masterList	A2	rep1
X	5591611	5596500	masterList	A2	rep1
X	6411340	6412630	masterList	A2	rep1
X	8160500	8167360	masterList	A2	rep1
X	8167876	8171179	masterList	A2	rep1
X	8704000	8705000	masterList	A2	rep1
X	8933977	8936500	masterList	A2	rep1
X	9160500	9161500	masterList	A2	rep1
X	9427000	9428500	masterList	A2	rep1
X	9755000	9760000	masterList	A2	rep1
X	9800465	9802058	masterList	A2	rep1
X	10871406	10877435	masterList	A2	rep1
X	11244619	11245947	masterList	A2	rep1
X	11458543	11460731	masterList	A2	rep1
X	12245500	12247000	masterList	A2	rep1
X	12396410	12400128	masterList	A2	rep1
X	12409688	12413406	masterList	A2	rep1
X	12591523	12612769	masterList	A2	rep1
X	13117930	13123225	masterList	A2	rep1
X	13426080	13432000	masterList	A2	rep1
X	13507500	13512626	masterList	A2	rep1
X	13681000	13682000	masterList	A2	rep1
X	13807500	13815000	masterList	A2	rep1
X	13892311	13904007	masterList	A2	rep1
X	15649000	15650000	masterList	A2	rep1
X	16495568	16500000	masterList	A2	rep1
X	17684000	17690500	masterList	A2	rep1
X	17921500	17922500	masterList	A2	rep1
X	21047500	21082926	masterList	A2	rep1
X	21141500	21354000	masterList	A2	rep1
X	21513000	21521000	masterList	A2	rep1
X	21661785	21704500	masterList	A2	rep1
X	21791000	21803500	masterList	A2	rep1
X	21983000	21984500	masterList	A2	rep1
X	22152000	22175500	masterList	A2	rep1
X	22955000	22957507	masterList	A2	rep1
X	23224624	23226990	masterList	A2	rep1
2L	27500	49000	masterList	A2	rep2
2L	126333	133544	masterList	A2	rep2
2L	994556	1008222	masterList	A2	rep2
2L	1513500	1520000	masterList	A2	rep2
2L	1742458	1744725	masterList	A2	rep2
2L	2905500	2907500	masterList	A2	rep2
2L	6039609	6043685	masterList	A2	rep2
2L	7165103	7175108	masterList	A2	rep2
2L	7882329	7890000	masterList	A2	rep2
2L	9222000	9223500	masterList	A2	rep2
2L	9449000	9451908	masterList	A2	rep2
2L	9828000	9831000	masterList	A2	rep2
2L	10108000	10110000	masterList	A2	rep2
2L	10189213	10194495	masterList	A2	rep2
2L	12088152	12102344	masterList	A2	rep2
2L	12259000	12264000	masterList	A2	rep2
2L	13046000	13047500	masterList	A2	rep2
2L	13623728	13628383	masterList	A2	rep2
2L	14465664	14476500	masterList	A2	rep2
2L	17173637	17179789	masterList	A2	rep2
2L	17423175	17427497	masterList	A2	rep2
2L	17651076	17656310	masterList	A2	rep2
2L	17996000	17997500	masterList	A2	rep2
2L	18084539	18090055	masterList	A2	rep2
2L	18841506	18848000	masterList	A2	rep2
2L	19191000	19196500	masterList	A2	rep2
2L	19487000	19488500	masterList	A2	rep2
2L	19505500	19509500	masterList	A2	rep2
2L	19527000	19537500	masterList	A2	rep2
2L	19593000	19594500	masterList	A2	rep2
2L	19750917	19759528	masterList	A2	rep2
2L	19845000	19852000	masterList	A2	rep2
2L	20108500	20126955	masterList	A2	rep2
2L	20153606	20215368	masterList	A2	rep2
2L	20276429	20281061	masterList	A2	rep2
2L	20371000	20375715	masterList	A2	rep2
2L	21563500	21568000	masterList	A2	rep2
2L	22016000	22019500	masterList	A2	rep2
2L	22067464	22169205	masterList	A2	rep2
2L	22274500	22282891	masterList	A2	rep2
2L	22574847	22579921	masterList	A2	rep2
2L	22590450	22595622	masterList	A2	rep2
2L	22845620	22849071	masterList	A2	rep2
2L	22853440	22863717	masterList	A2	rep2
2L	22953304	22959500	masterList	A2	rep2
2L	23056000	23056659	masterList	A2	rep2
2L	23060075	23096433	masterList	A2	rep2
2L	23099848	23115773	masterList	A2	rep2
2L	23117316	23136000	masterList	A2	rep2
2L	23207000	23282000	masterList	A2	rep2
2L	23297500	23354169	masterList	A2	rep2
2L	23373873	23390000	masterList	A2	rep2
2R	127713	129000	masterList	A2	rep2
2R	179000	196000	masterList	A2	rep2
2R	305000	306000	masterList	A2	rep2
2R	474000	475500	masterList	A2	rep2
2R	1056000	1071000	masterList	A2	rep2
2R	1203535	1238316	masterList	A2	rep2
2R	1621998	1707864	masterList	A2	rep2
2R	1731262	1759036	masterList	A2	rep2
2R	1839852	1868500	masterList	A2	rep2
2R	2006000	2024500	masterList	A2	rep2
2R	2238500	2246452	masterList	A2	rep2
2R	2252500	2261974	masterList	A2	rep2
2R	2270423	2295655	masterList	A2	rep2
2R	2306252	2336000	masterList	A2	rep2
2R	2384000	2388933	masterList	A2	rep2
2R	2393081	2422683	masterList	A2	rep2
2R	2424587	2425000	masterList	A2	rep2
2R	2498000	2624000	masterList	A2	rep2
2R	2725500	2826550	masterList	A2	rep2
2R	2832495	2842176	masterList	A2	rep2
2R	2862332	2885500	masterList	A2	rep2
2R	3022716	3068367	masterList	A2	rep2
2R	3134500	3162500	masterList	A2	rep2
2R	3174000	3191500	masterList	A2	rep2
2R	3650000	3651500	masterList	A2	rep2
2R	3710500	3718299	masterList	A2	rep2
2R	3758500	3973500	masterList	A2	rep2
2R	4079000	4087500	masterList	A2	rep2
2R	4270000	4271000	masterList	A2	rep2
2R	4293500	4311369	masterList	A2	rep2
2R	4428000	4566500	masterList	A2	rep2
2R	4588220	4621258	masterList	A2	rep2
2R	4634487	4660440	masterList	A2	rep2
2R	4687464	4705806	masterList	A2	rep2
2R	4727533	4734669	masterList	A2	rep2
2R	4741500	4804174	masterList	A2	rep2
2R	4807133	4819500	masterList	A2	rep2
2R	4985928	5002836	masterList	A2	rep2
2R	5796438	6070924	masterList	A2	rep2
2R	6364989	6366000	masterList	A2	rep2
2R	7213500	7214500	masterList	A2	rep2
2R	7985500	7987500	masterList	A2	rep2
2R	8634000	8637500	masterList	A2	rep2
2R	8717393	8720000	masterList	A2	rep2
2R	9380008	9387500	masterList	A2	rep2
2R	9914500	9915500	masterList	A2	rep2
2R	10473000	10480382	masterList	A2	rep2
2R	12246629	12257693	masterList	A2	rep2
2R	13736876	13749577	masterList	A2	rep2
2R	13845471	13848171	masterList	A2	rep2
2R	16561329	16564896	masterList	A2	rep2
2R	17642000	17644500	masterList	A2	rep2
2R	18922500	18924012	masterList	A2	rep2
2R	19220585	19222798	masterList	A2	rep2
2R	19909136	19912201	masterList	A2	rep2
2R	20580500	20582000	masterList	A2	rep2
2R	20687000	20690000	masterList	A2	rep2
2R	22102580	22104030	masterList	A2	rep2
2R	22264348	22271816	masterList	A2	rep2
2R	22399417	22401730	masterList	A2	rep2
2R	23526755	23528486	masterList	A2	rep2
2R	24686500	24715500	masterList	A2	rep2
3L	544678	547739	masterList	A2	rep2
3L	3115960	3122804	masterList	A2	rep2
3L	4640016	4643971	masterList	A2	rep2
3L	5490554	5493500	masterList	A2	rep2
3L	5642000	5644500	masterList	A2	rep2
3L	5959000	5965758	masterList	A2	rep2
3L	6512500	6515358	masterList	A2	rep2
3L	8153395	8157519	masterList	A2	rep2
3L	8613449	8620315	masterList	A2	rep2
3L	8872416	8877329	masterList	A2	rep2
3L	9354941	9357937	masterList	A2	rep2
3L	9977000	9982000	masterList	A2	rep2
3L	11565351	11568258	masterList	A2	rep2
3L	13275500	13276500	masterList	A2	rep2
3L	15611295	15618302	masterList	A2	rep2
3L	16637500	16648000	masterList	A2	rep2
3L	16649000	16650000	masterList	A2	rep2
3L	17864182	17869605	masterList	A2	rep2
3L	18341000	18346000	masterList	A2	rep2
3L	18745000	18753099	masterList	A2	rep2
3L	19029917	19034000	masterList	A2	rep2
3L	19440000	19441000	masterList	A2	rep2
3L	19509500	19510500	masterList	A2	rep2
3L	19629500	19637000	masterList	A2	rep2
3L	21234067	21239255	masterList	A2	rep2
3L	21574500	21577500	masterList	A2	rep2
3L	21582340	21589000	masterList	A2	rep2
3L	22152500	22159500	masterList	A2	rep2
3L	22817418	22825333	masterList	A2	rep2
3L	22994720	23042291	masterList	A2	rep2
3L	23178500	23212500	masterList	A2	rep2
3L	23393500	23415500	masterList	A2	rep2
3L	23513500	23519500	masterList	A2	rep2
3L	23659578	23664000	masterList	A2	rep2
3L	23842500	23846288	masterList	A2	rep2
3L	24369000	24370000	masterList	A2	rep2
3L	24576000	24593000	masterList	A2	rep2
3L	24809000	24814501	masterList	A2	rep2
3L	24822500	24825000	masterList	A2	rep2
3L	24840500	24843000	masterList	A2	rep2
3L	25082575	25095285	masterList	A2	rep2
3L	25171381	25217500	masterList	A2	rep2
3L	25258883	25349000	masterList	A2	rep2
3L	25374500	25452500	masterList	A2	rep2
3L	25484156	25537500	masterList	A2	rep2
3L	25559000	25566500	masterList	A2	rep2
3L	25594500	25595500	masterList	A2	rep2
3L	25687251	25689727	masterList	A2	rep2
3L	25695145	25699375	masterList	A2	rep2
3L	25705695	25709260	masterList	A2	rep2
3L	25715058	25721143	masterList	A2	rep2
3L	25874500	25883442	masterList	A2	rep2
3L	25887862	25902500	masterList	A2	rep2
3L	25936500	25946500	masterList	A2	rep2
3L	25963000	25970000	masterList	A2	rep2
3L	25985000	26016000	masterList	A2	rep2
3L	26141000	26142000	masterList	A2	rep2
3L	26149000	26152000	masterList	A2	rep2
3L	26161000	26164000	masterList	A2	rep2
3L	26186000	26195162	masterList	A2	rep2
3L	26200533	26201000	masterList	A2	rep2
3L	26208238	26234500	masterList	A2	rep2
3L	26751000	26754500	masterList	A2	rep2
3L	26807000	26817500	masterList	A2	rep2
3L	26844000	26851000	masterList	A2	rep2
3L	26858602	26864500	masterList	A2	rep2
3L	26875827	26934824	masterList	A2	rep2
3L	27504500	27508542	masterList	A2	rep2
3L	27512273	27528317	masterList	A2	rep2
3L	27530848	27541500	masterList	A2	rep2
3L	27620000	27634919	masterList	A2	rep2
3L	27642120	27653354	masterList	A2	rep2
3L	27659403	27729917	masterList	A2	rep2
3L	27787104	27798835	masterList	A2	rep2
3L	27821500	27837220	masterList	A2	rep2
3L	27853158	27865000	masterList	A2	rep2
3L	28339000	28340000	masterList	A2	rep2
3L	28941500	28949500	masterList	A2	rep2
3R	65905	67500	masterList	A2	rep2
3R	287000	312000	masterList	A2	rep2
3R	508000	520813	masterList	A2	rep2
3R	523270	530910	masterList	A2	rep2
3R	534500	599454	masterList	A2	rep2
3R	602598	618000	masterList	A2	rep2
3R	847301	1068000	masterList	A2	rep2
3R	1188500	1191000	masterList	A2	rep2
3R	1518000	1560500	masterList	A2	rep2
3R	1852625	1887373	masterList	A2	rep2
3R	2212500	2215000	masterList	A2	rep2
3R	2399500	2400500	masterList	A2	rep2
3R	2417000	2418500	masterList	A2	rep2
3R	2429500	2432000	masterList	A2	rep2
3R	2494500	2511000	masterList	A2	rep2
3R	2515854	2520000	masterList	A2	rep2
3R	2626000	2658000	masterList	A2	rep2
3R	2670000	2787000	masterList	A2	rep2
3R	3076027	3078000	masterList	A2	rep2
3R	3249500	3254500	masterList	A2	rep2
3R	3317500	3326918	masterList	A2	rep2
3R	3344000	3378000	masterList	A2	rep2
3R	3757500	3788628	masterList	A2	rep2
3R	3797014	3825921	masterList	A2	rep2
3R	3848415	3903488	masterList	A2	rep2
3R	3911945	3924000	masterList	A2	rep2
3R	3996000	4025000	masterList	A2	rep2
3R	4105500	4134500	masterList	A2	rep2
3R	4184408	4242017	masterList	A2	rep2
3R	4609000	4613500	masterList	A2	rep2
3R	6167000	6177308	masterList	A2	rep2
3R	7249500	7253000	masterList	A2	rep2
3R	7255500	7257500	masterList	A2	rep2
3R	7259000	7261500	masterList	A2	rep2
3R	7263000	7264617	masterList	A2	rep2
3R	7719803	7726812	masterList	A2	rep2
3R	8100500	8102000	masterList	A2	rep2
3R	8817000	8826000	masterList	A2	rep2
3R	8992909	9003152	masterList	A2	rep2
3R	9780500	9781500	masterList	A2	rep2
3R	9814021	9819557	masterList	A2	rep2
3R	10619749	10624000	masterList	A2	rep2
3R	11357000	11358500	masterList	A2	rep2
3R	12689000	12696500	masterList	A2	rep2
3R	12809000	12813000	masterList	A2	rep2
3R	13689000	13691125	masterList	A2	rep2
3R	13788284	13793749	masterList	A2	rep2
3R	13824711	13832714	masterList	A2	rep2
3R	13926392	13934000	masterList	A2	rep2
3R	13981000	13984500	masterList	A2	rep2
3R	14292000	14293500	masterList	A2	rep2
3R	14755000	14759445	masterList	A2	rep2
3R	15394937	15407516	masterList	A2	rep2
3R	15427000	15428000	masterList	A2	rep2
3R	15429000	15432000	masterList	A2	rep2
3R	17031000	17037440	masterList	A2	rep2
3R	18919500	18921770	masterList	A2	rep2
3R	19113500	19115500	masterList	A2	rep2
3R	21439059	21454000	masterList	A2	rep2
3R	27517000	27518000	masterList	A2	rep2
3R	29298150	29301384	masterList	A2	rep2
3R	30844000	30845500	masterList	A2	rep2
3R	31253936	31270000	masterList	A2	rep2
3R	32177500	32184500	masterList	A2	rep2
4	31000	35068	masterList	A2	rep2
4	102928	112441	masterList	A2	rep2
4	122500	138500	masterList	A2	rep2
4	527887	534000	masterList	A2	rep2
4	577841	584734	masterList	A2	rep2
4	591473	598300	masterList	A2	rep2
4	666332	677522	masterList	A2	rep2
4	757889	794512	masterList	A2	rep2
4	930500	1013000	masterList	A2	rep2
4	1129000	1130000	masterList	A2	rep2
4	1191500	1199912	masterList	A2	rep2
4	1459500	1473000	masterList	A2	rep2
4	1522556	1568000	masterList	A2	rep2
U_0	45897	54720	masterList	A2	rep2
U_105	6500	32901	masterList	A2	rep2
U_106	11500	18500	masterList	A2	rep2
U_108	12000	26000	masterList	A2	rep2
U_111	13000	19792	masterList	A2	rep2
U_116	32000	33000	masterList	A2	rep2
U_122	13247	48488	masterList	A2	rep2
U_13	458	1559	masterList	A2	rep2
U_130	15624	22632	masterList	A2	rep2
U_139	19500	22500	masterList	A2	rep2
U_143	53000	54000	masterList	A2	rep2
U_145	19351	23514	masterList	A2	rep2
U_154	79500	109500	masterList	A2	rep2
U_159	29000	38500	masterList	A2	rep2
U_23	22	15500	masterList	A2	rep2
U_26	3	83665	masterList	A2	rep2
U_33	67500	68500	masterList	A2	rep2
U_42	31500	36500	masterList	A2	rep2
U_46	25	53969	masterList	A2	rep2
U_51	31822	37277	masterList	A2	rep2
U_62	52500	56500	masterList	A2	rep2
U_7	1	7921	masterList	A2	rep2
U_7	13415	24000	masterList	A2	rep2
U_75	56522	63634	masterList	A2	rep2
U_8	2500	33500	masterList	A2	rep2
U_80	22000	25000	masterList	A2	rep2
U_81	18500	19500	masterList	A2	rep2
U_89	13500	15000	masterList	A2	rep2
U_92	12250	18704	masterList	A2	rep2
X	867814	869000	masterList	A2	rep2
X	870500	873000	masterList	A2	rep2
X	1370000	1376000	masterList	A2	rep2
X	2053500	2069012	masterList	A2	rep2
X	2081693	2097760	masterList	A2	rep2
X	2105793	2111000	masterList	A2	rep2
X	3148150	3153128	masterList	A2	rep2
X	3302500	3303500	masterList	A2	rep2
X	3952500	3953785	masterList	A2	rep2
X	3957636	3959500	masterList	A2	rep2
X	5591611	5596125	masterList	A2	rep2
X	6411340	6412630	masterList	A2	rep2
X	8160500	8167360	masterList	A2	rep2
X	8167876	8171179	masterList	A2	rep2
X	8704000	8705000	masterList	A2	rep2
X	8933977	8935571	masterList	A2	rep2
X	9160500	9161500	masterList	A2	rep2
X	9427000	9428500	masterList	A2	rep2
X	9755500	9760000	masterList	A2	rep2
X	9800465	9802058	masterList	A2	rep2
X	10871406	10877435	masterList	A2	rep2
X	11244619	11245947	masterList	A2	rep2
X	11458543	11460731	masterList	A2	rep2
X	12245500	12247000	masterList	A2	rep2
X	12396410	12400128	masterList	A2	rep2
X	12409688	12413406	masterList	A2	rep2
X	12591523	12612769	masterList	A2	rep2
X	13117631	13123223	masterList	A2	rep2
X	13426017	13432000	masterList	A2	rep2
X	13507500	13512626	masterList	A2	rep2
X	13681000	13682000	masterList	A2	rep2
X	13807500	13815000	masterList	A2	rep2
X	13892311	13904007	masterList	A2	rep2
X	15649000	15650000	masterList	A2	rep2
X	16495029	16500000	masterList	A2	rep2
X	17684000	17685500	masterList	A2	rep2
X	17921500	17922500	masterList	A2	rep2
X	21047500	21083000	masterList	A2	rep2
X	21141500	21354000	masterList	A2	rep2
X	21513000	21521000	masterList	A2	rep2
X	21661500	21704500	masterList	A2	rep2
X	21785000	21803500	masterList	A2	rep2
X	21980500	21984500	masterList	A2	rep2
X	22149000	22175500	masterList	A2	rep2
X	22955000	22957754	masterList	A2	rep2
X	23224624	23226990	masterList	A2	rep2
2L	1	50000	masterList	A4	rep1
2L	55394	61233	masterList	A4	rep1
2L	113500	117500	masterList	A4	rep1
2L	747000	748000	masterList	A4	rep1
2L	1493250	1499877	masterList	A4	rep1
2L	1740564	1742320	masterList	A4	rep1
2L	2322000	2323000	masterList	A4	rep1
2L	3329452	3337423	masterList	A4	rep1
2L	3677000	3678500	masterList	A4	rep1
2L	7056009	7062000	masterList	A4	rep1
2L	7717117	7720000	masterList	A4	rep1
2L	7843035	7853111	masterList	A4	rep1
2L	8484500	8485500	masterList	A4	rep1
2L	8494000	8495500	masterList	A4	rep1
2L	8661500	8663000	masterList	A4	rep1
2L	8718000	8726000	masterList	A4	rep1
2L	9025426	9031230	masterList	A4	rep1
2L	9164000	9189202	masterList	A4	rep1
2L	9792000	9800500	masterList	A4	rep1
2L	10733000	10739537	masterList	A4	rep1
2L	12755000	12762520	masterList	A4	rep1
2L	13545678	13551000	masterList	A4	rep1
2L	14370000	14378000	masterList	A4	rep1
2L	16881000	16890000	masterList	A4	rep1
2L	17055742	17063313	masterList	A4	rep1
2L	17973000	17974500	masterList	A4	rep1
2L	19453781	19455665	masterList	A4	rep1
2L	20067000	20085263	masterList	A4	rep1
2L	20091000	20093604	masterList	A4	rep1
2L	20101137	20177305	masterList	A4	rep1
2L	20627401	20635182	masterList	A4	rep1
2L	21009000	21012000	masterList	A4	rep1
2L	21633587	21646699	masterList	A4	rep1
2L	21662638	21684191	masterList	A4	rep1
2L	21751383	21757219	masterList	A4	rep1
2L	21977500	21988477	masterList	A4	rep1
2L	22029403	22032478	masterList	A4	rep1
2L	22321615	22352594	masterList	A4	rep1
2L	22361880	22399469	masterList	A4	rep1
2L	22499263	22551029	masterList	A4	rep1
2L	22745000	22751500	masterList	A4	rep1
2L	23027872	23031924	masterList	A4	rep1
2L	23062500	23065505	masterList	A4	rep1
2L	23071224	23075500	masterList	A4	rep1
2L	23194500	23195500	masterList	A4	rep1
2L	23313500	23350635	masterList	A4	rep1
2L	23357668	23371500	masterList	A4	rep1
2L	23463141	23515692	masterList	A4	rep1
2L	23568500	23597000	masterList	A4	rep1
2L	23612500	23637500	masterList	A4	rep1
2R	408500	423754	masterList	A4	rep1
2R	592000	594500	masterList	A4	rep1
2R	821000	829194	masterList	A4	rep1
2R	832000	837000	masterList	A4	rep1
2R	1277000	1298500	masterList	A4	rep1
2R	1523630	1531000	masterList	A4	rep1
2R	1735567	1785841	masterList	A4	rep1
2R	2508669	2538833	masterList	A4	rep1
2R	2551000	2552500	masterList	A4	rep1
2R	2570000	2596500	masterList	A4	rep1
2R	2620561	2645000	masterList	A4	rep1
2R	2710000	2714500	masterList	A4	rep1
2R	2734343	2779590	masterList	A4	rep1
2R	2900806	2970631	masterList	A4	rep1
2R	3254000	3343500	masterList	A4	rep1
2R	3723500	3725000	masterList	A4	rep1
2R	3741500	3750300	masterList	A4	rep1
2R	3835000	3836000	masterList	A4	rep1
2R	4025263	4027561	masterList	A4	rep1
2R	4074500	4101000	masterList	A4	rep1
2R	4175000	4188000	masterList	A4	rep1
2R	4204000	4213000	masterList	A4	rep1
2R	4230000	4232000	masterList	A4	rep1
2R	4266582	4293394	masterList	A4	rep1
2R	4579940	4640000	masterList	A4	rep1
2R	4904500	4910432	masterList	A4	rep1
2R	4937277	4987500	masterList	A4	rep1
2R	5996500	6267000	masterList	A4	rep1
2R	6380446	6383552	masterList	A4	rep1
2R	7241080	7242913	masterList	A4	rep1
2R	7493611	7494936	masterList	A4	rep1
2R	8505000	8521211	masterList	A4	rep1
2R	11592721	11594768	masterList	A4	rep1
2R	12530000	12565000	masterList	A4	rep1
2R	12696500	12735267	masterList	A4	rep1
2R	14363000	14366000	masterList	A4	rep1
2R	16659873	16665428	masterList	A4	rep1
2R	17296225	17300000	masterList	A4	rep1
2R	17631038	17634000	masterList	A4	rep1
2R	18574500	18580500	masterList	A4	rep1
2R	19165500	19167000	masterList	A4	rep1
2R	22273644	22281155	masterList	A4	rep1
2R	22687809	22690208	masterList	A4	rep1
2R	23359000	23360000	masterList	A4	rep1
2R	24609476	24611222	masterList	A4	rep1
2R	24959406	24973300	masterList	A4	rep1
3L	378702	385633	masterList	A4	rep1
3L	1481559	1484679	masterList	A4	rep1
3L	2667000	2672000	masterList	A4	rep1
3L	3150500	3156000	masterList	A4	rep1
3L	3457789	3465313	masterList	A4	rep1
3L	3567500	3568500	masterList	A4	rep1
3L	5518000	5519000	masterList	A4	rep1
3L	6100000	6101500	masterList	A4	rep1
3L	6709540	6716930	masterList	A4	rep1
3L	7182025	7190000	masterList	A4	rep1
3L	7759000	7764000	masterList	A4	rep1
3L	7932383	7938275	masterList	A4	rep1
3L	8407000	8414000	masterList	A4	rep1
3L	8505246	8513536	masterList	A4	rep1
3L	8674486	8681455	masterList	A4	rep1
3L	9420187	9422531	masterList	A4	rep1
3L	9506062	9510462	masterList	A4	rep1
3L	9967786	9975361	masterList	A4	rep1
3L	11189000	11190500	masterList	A4	rep1
3L	11625000	11629500	masterList	A4	rep1
3L	12036707	12050500	masterList	A4	rep1
3L	12454000	12457500	masterList	A4	rep1
3L	12461500	12463500	masterList	A4	rep1
3L	13379000	13380000	masterList	A4	rep1
3L	13537385	13544000	masterList	A4	rep1
3L	13744028	13751454	masterList	A4	rep1
3L	14497000	14509000	masterList	A4	rep1
3L	16563499	16565000	masterList	A4	rep1
3L	17866000	17867000	masterList	A4	rep1
3L	19608500	19610500	masterList	A4	rep1
3L	19678500	19679500	masterList	A4	rep1
3L	19801000	19812482	masterList	A4	rep1
3L	19838194	19847000	masterList	A4	rep1
3L	19958953	19967364	masterList	A4	rep1
3L	21093000	21095797	masterList	A4	rep1
3L	21401500	21407000	masterList	A4	rep1
3L	21737500	21747000	masterList	A4	rep1
3L	22226510	22234000	masterList	A4	rep1
3L	22654000	22660000	masterList	A4	rep1
3L	23153216	23227136	masterList	A4	rep1
3L	23354500	23395500	masterList	A4	rep1
3L	23531000	23535476	masterList	A4	rep1
3L	23578500	23581000	masterList	A4	rep1
3L	23728500	23740500	masterList	A4	rep1
3L	23771500	23777193	masterList	A4	rep1
3L	23951598	23968040	masterList	A4	rep1
3L	23987568	24002723	masterList	A4	rep1
3L	24043517	24127102	masterList	A4	rep1
3L	24169038	24262893	masterList	A4	rep1
3L	24331930	24431582	masterList	A4	rep1
3L	25046971	25136988	masterList	A4	rep1
3L	25152590	25157271	masterList	A4	rep1
3L	25166410	25231123	masterList	A4	rep1
3L	25267500	25327500	masterList	A4	rep1
3L	25385000	25463000	masterList	A4	rep1
3L	25510635	25535500	masterList	A4	rep1
3L	25788500	25832692	masterList	A4	rep1
3L	25842133	25856000	masterList	A4	rep1
3L	26001000	26002000	masterList	A4	rep1
3L	26009000	26014000	masterList	A4	rep1
3L	26023000	26026000	masterList	A4	rep1
3L	26031000	26049472	masterList	A4	rep1
3L	26081004	26106000	masterList	A4	rep1
3L	26412000	26441500	masterList	A4	rep1
3L	26452000	26460000	masterList	A4	rep1
3L	26517000	26523500	masterList	A4	rep1
3L	26551000	26566000	masterList	A4	rep1
3L	26571000	26574000	masterList	A4	rep1
3L	26637470	26644614	masterList	A4	rep1
3L	26973000	26984500	masterList	A4	rep1
3L	27091000	27125634	masterList	A4	rep1
3L	27213000	27431312	masterList	A4	rep1
3L	28155000	28179470	masterList	A4	rep1
3L	28207500	28211472	masterList	A4	rep1
3L	28688000	28727500	masterList	A4	rep1
3L	28800113	28846070	masterList	A4	rep1
3R	810744	975296	masterList	A4	rep1
3R	1060000	1073118	masterList	A4	rep1
3R	1298771	1477180	masterList	A4	rep1
3R	1556000	1565000	masterList	A4	rep1
3R	1880673	1887000	masterList	A4	rep1
3R	1940239	1943297	masterList	A4	rep1
3R	2121156	2264372	masterList	A4	rep1
3R	2811000	2812000	masterList	A4	rep1
3R	2840500	2937500	masterList	A4	rep1
3R	3260909	3299228	masterList	A4	rep1
3R	3503000	3510000	masterList	A4	rep1
3R	3620743	3630000	masterList	A4	rep1
3R	3677529	3963960	masterList	A4	rep1
3R	4039000	4041000	masterList	A4	rep1
3R	4295144	4304876	masterList	A4	rep1
3R	4308170	4358000	masterList	A4	rep1
3R	4413500	4415895	masterList	A4	rep1
3R	4421517	4515000	masterList	A4	rep1
3R	4604000	4677500	masterList	A4	rep1
3R	4882000	4883500	masterList	A4	rep1
3R	4885500	4908012	masterList	A4	rep1
3R	5374500	5385000	masterList	A4	rep1
3R	5672000	5684899	masterList	A4	rep1
3R	5955546	5960937	masterList	A4	rep1
3R	6793000	6800298	masterList	A4	rep1
3R	6840558	6844112	masterList	A4	rep1
3R	8369360	8376000	masterList	A4	rep1
3R	9857319	9863047	masterList	A4	rep1
3R	10759000	10766687	masterList	A4	rep1
3R	10906000	10907500	masterList	A4	rep1
3R	11379000	11388000	masterList	A4	rep1
3R	11786000	11789000	masterList	A4	rep1
3R	12042258	12044500	masterList	A4	rep1
3R	12531500	12537000	masterList	A4	rep1
3R	12539000	12542500	masterList	A4	rep1
3R	12543500	12545500	masterList	A4	rep1
3R	12760805	12768290	masterList	A4	rep1
3R	13063500	13065500	masterList	A4	rep1
3R	13079500	13084000	masterList	A4	rep1
3R	13101500	13112500	masterList	A4	rep1
3R	14233227	14240000	masterList	A4	rep1
3R	14280082	14285541	masterList	A4	rep1
3R	15890000	15895000	masterList	A4	rep1
3R	17537203	17552000	masterList	A4	rep1
3R	19565000	19570509	masterList	A4	rep1
3R	22411610	22414500	masterList	A4	rep1
3R	23806296	23810500	masterList	A4	rep1
3R	24415000	24416000	masterList	A4	rep1
3R	24534375	24541291	masterList	A4	rep1
3R	25101209	25108595	masterList	A4	rep1
3R	26011451	26023565	masterList	A4	rep1
3R	26031082	26037000	masterList	A4	rep1
3R	28259345	28265168	masterList	A4	rep1
3R	28753098	28760547	masterList	A4	rep1
3R	28965888	28972030	masterList	A4	rep1
3R	30934000	30944500	masterList	A4	rep1
3R	32035793	32043194	masterList	A4	rep1
3R	32642000	32656647	masterList	A4	rep1
3R	32732500	32733500	masterList	A4	rep1
4	110510	122293	masterList	A4	rep1
4	134000	150000	masterList	A4	rep1
4	318393	324500	masterList	A4	rep1
4	533854	542800	masterList	A4	rep1
4	590677	597102	masterList	A4	rep1
4	635650	641634	masterList	A4	rep1
4	683904	692302	masterList	A4	rep1
4	747277	748287	masterList	A4	rep1
4	752098	759291	masterList	A4	rep1
4	783026	795500	masterList	A4	rep1
4	814166	820078	masterList	A4	rep1
4	848043	853059	masterList	A4	rep1
4	968682	1050543	masterList	A4	rep1
4	1128560	1133384	masterList	A4	rep1
4	1243851	1247711	masterList	A4	rep1
4	1294500	1339000	masterList	A4	rep1
U_16	21500	28500	masterList	A4	rep1
U_16	90500	92500	masterList	A4	rep1
U_19	45500	46500	masterList	A4	rep1
U_35	39500	40500	masterList	A4	rep1
U_37	31500	47000	masterList	A4	rep1
U_39	8000	10000	masterList	A4	rep1
U_39	90000	109500	masterList	A4	rep1
U_43	7500	9000	masterList	A4	rep1
U_45	17000	32000	masterList	A4	rep1
U_46	5000	6000	masterList	A4	rep1
U_47	8500	20000	masterList	A4	rep1
U_50	500	46672	masterList	A4	rep1
U_56	37000	38000	masterList	A4	rep1
U_62	0	17500	masterList	A4	rep1
U_65	15500	40639	masterList	A4	rep1
U_69	1	28421	masterList	A4	rep1
U_70	8000	9500	masterList	A4	rep1
U_71	15500	16500	masterList	A4	rep1
U_74	7	41409	masterList	A4	rep1
U_76	39500	41000	masterList	A4	rep1
U_85	3000	18500	masterList	A4	rep1
X	8	57445	masterList	A4	rep1
X	66520	69000	masterList	A4	rep1
X	440500	452500	masterList	A4	rep1
X	468319	482500	masterList	A4	rep1
X	925334	935348	masterList	A4	rep1
X	1615000	1622000	masterList	A4	rep1
X	2703662	2711019	masterList	A4	rep1
X	2955994	2957007	masterList	A4	rep1
X	3212500	3228538	masterList	A4	rep1
X	3339229	3344500	masterList	A4	rep1
X	3368000	3378500	masterList	A4	rep1
X	3979722	3986894	masterList	A4	rep1
X	4068745	4069934	masterList	A4	rep1
X	5712609	5716691	masterList	A4	rep1
X	6203000	6206597	masterList	A4	rep1
X	6571651	6574681	masterList	A4	rep1
X	8279803	8284654	masterList	A4	rep1
X	8796000	8797000	masterList	A4	rep1
X	9647000	9649000	masterList	A4	rep1
X	10594437	10600234	masterList	A4	rep1
X	10989244	10991868	masterList	A4	rep1
X	11101181	11106803	masterList	A4	rep1
X	11177626	11184915	masterList	A4	rep1
X	12103725	12108000	masterList	A4	rep1
X	12397391	12399499	masterList	A4	rep1
X	12437000	12438500	masterList	A4	rep1
X	12602999	12604930	masterList	A4	rep1
X	13323079	13328587	masterList	A4	rep1
X	15267221	15274752	masterList	A4	rep1
X	15611149	15612599	masterList	A4	rep1
X	16015593	16047400	masterList	A4	rep1
X	16248848	16253755	masterList	A4	rep1
X	17179000	17180500	masterList	A4	rep1
X	17181500	17184500	masterList	A4	rep1
X	18059940	18062301	masterList	A4	rep1
X	18494653	18511376	masterList	A4	rep1
X	19141641	19144810	masterList	A4	rep1
X	20659000	20660000	masterList	A4	rep1
X	20977150	20989320	masterList	A4	rep1
X	21153000	21158363	masterList	A4	rep1
X	21243939	21245000	masterList	A4	rep1
X	21505587	21531500	masterList	A4	rep1
X	21586000	21590173	masterList	A4	rep1
X	21604000	22008500	masterList	A4	rep1
X	22198500	22199500	masterList	A4	rep1
X	22229500	22248000	masterList	A4	rep1
X	22256908	22360205	masterList	A4	rep1
X	22421000	22514000	masterList	A4	rep1
X	22727331	22736000	masterList	A4	rep1
X	22958906	23045338	masterList	A4	rep1
X	23201337	23420580	masterList	A4	rep1
X	23582500	23583500	masterList	A4	rep1
X	23594361	23609254	masterList	A4	rep1
2L	1	50263	masterList	A4	rep2
2L	55130	61233	masterList	A4	rep2
2L	113500	117160	masterList	A4	rep2
2L	747500	748500	masterList	A4	rep2
2L	1493251	1499579	masterList	A4	rep2
2L	1740564	1742320	masterList	A4	rep2
2L	3329428	3337422	masterList	A4	rep2
2L	3677000	3678500	masterList	A4	rep2
2L	7055898	7062000	masterList	A4	rep2
2L	7717118	7720000	masterList	A4	rep2
2L	7843035	7857999	masterList	A4	rep2
2L	8484500	8485500	masterList	A4	rep2
2L	8494000	8495500	masterList	A4	rep2
2L	8661500	8662500	masterList	A4	rep2
2L	8718000	8726000	masterList	A4	rep2
2L	9025428	9031225	masterList	A4	rep2
2L	9163500	9177538	masterList	A4	rep2
2L	9797500	9800500	masterList	A4	rep2
2L	10733000	10739540	masterList	A4	rep2
2L	12755000	12762509	masterList	A4	rep2
2L	13545678	13551000	masterList	A4	rep2
2L	14370000	14377725	masterList	A4	rep2
2L	16881000	16890000	masterList	A4	rep2
2L	17055752	17063314	masterList	A4	rep2
2L	17973000	17974500	masterList	A4	rep2
2L	19453781	19455665	masterList	A4	rep2
2L	20065500	20093604	masterList	A4	rep2
2L	20101137	20177305	masterList	A4	rep2
2L	20627735	20635252	masterList	A4	rep2
2L	21009000	21012000	masterList	A4	rep2
2L	21633587	21646699	masterList	A4	rep2
2L	21662638	21691777	masterList	A4	rep2
2L	21751383	21757219	masterList	A4	rep2
2L	21976564	21986922	masterList	A4	rep2
2L	22029448	22032385	masterList	A4	rep2
2L	22321615	22352594	masterList	A4	rep2
2L	22361880	22399469	masterList	A4	rep2
2L	22499263	22551029	masterList	A4	rep2
2L	22745000	22751500	masterList	A4	rep2
2L	23027872	23031924	masterList	A4	rep2
2L	23062500	23065505	masterList	A4	rep2
2L	23071224	23075000	masterList	A4	rep2
2L	23194500	23195500	masterList	A4	rep2
2L	23332000	23350635	masterList	A4	rep2
2L	23357668	23371000	masterList	A4	rep2
2L	23463141	23515692	masterList	A4	rep2
2L	23568500	23597000	masterList	A4	rep2
2L	23612500	23637000	masterList	A4	rep2
2R	2000	3000	masterList	A4	rep2
2R	408500	423754	masterList	A4	rep2
2R	592000	594500	masterList	A4	rep2
2R	821000	829194	masterList	A4	rep2
2R	832000	837000	masterList	A4	rep2
2R	1277500	1297000	masterList	A4	rep2
2R	1523630	1531000	masterList	A4	rep2
2R	1735567	1785841	masterList	A4	rep2
2R	2507500	2538833	masterList	A4	rep2
2R	2551000	2552500	masterList	A4	rep2
2R	2571500	2601000	masterList	A4	rep2
2R	2620561	2645000	masterList	A4	rep2
2R	2710000	2714500	masterList	A4	rep2
2R	2734000	2789000	masterList	A4	rep2
2R	2900806	2970631	masterList	A4	rep2
2R	3301500	3343500	masterList	A4	rep2
2R	3723500	3725000	masterList	A4	rep2
2R	3741500	3750028	masterList	A4	rep2
2R	3835000	3836000	masterList	A4	rep2
2R	4025263	4027561	masterList	A4	rep2
2R	4076000	4101500	masterList	A4	rep2
2R	4175000	4188000	masterList	A4	rep2
2R	4204000	4212915	masterList	A4	rep2
2R	4230500	4232500	masterList	A4	rep2
2R	4266582	4293394	masterList	A4	rep2
2R	4579940	4640500	masterList	A4	rep2
2R	4902500	4910432	masterList	A4	rep2
2R	4937277	4987500	masterList	A4	rep2
2R	5996500	6267000	masterList	A4	rep2
2R	6380446	6383552	masterList	A4	rep2
2R	7241080	7242913	masterList	A4	rep2
2R	7493611	7494936	masterList	A4	rep2
2R	8505000	8520971	masterList	A4	rep2
2R	11592721	11594768	masterList	A4	rep2
2R	12544000	12565000	masterList	A4	rep2
2R	12696500	12735267	masterList	A4	rep2
2R	14363000	14366000	masterList	A4	rep2
2R	16659724	16665171	masterList	A4	rep2
2R	17293500	17301000	masterList	A4	rep2
2R	17631034	17634000	masterList	A4	rep2
2R	18574500	18581000	masterList	A4	rep2
2R	19165500	19167000	masterList	A4	rep2
2R	22273562	22281399	masterList	A4	rep2
2R	22687809	22690208	masterList	A4	rep2
2R	23359000	23360000	masterList	A4	rep2
2R	24609476	24611500	masterList	A4	rep2
2R	24959406	24973300	masterList	A4	rep2
3L	378702	385633	masterList	A4	rep2
3L	1481559	1484679	masterList	A4	rep2
3L	2667000	2672000	masterList	A4	rep2
3L	3152000	3157000	masterList	A4	rep2
3L	3457790	3465302	masterList	A4	rep2
3L	3567500	3568500	masterList	A4	rep2
3L	6100000	6101500	masterList	A4	rep2
3L	6709538	6716919	masterList	A4	rep2
3L	7182216	7190000	masterList	A4	rep2
3L	7759000	7764000	masterList	A4	rep2
3L	7932383	7938273	masterList	A4	rep2
3L	8407000	8414000	masterList	A4	rep2
3L	8505025	8513076	masterList	A4	rep2
3L	8674486	8681455	masterList	A4	rep2
3L	9420187	9422531	masterList	A4	rep2
3L	9505908	9510463	masterList	A4	rep2
3L	9967790	9975361	masterList	A4	rep2
3L	11189000	11190500	masterList	A4	rep2
3L	11625500	11629500	masterList	A4	rep2
3L	12036707	12050500	masterList	A4	rep2
3L	12454000	12457500	masterList	A4	rep2
3L	12461500	12463500	masterList	A4	rep2
3L	13379000	13380000	masterList	A4	rep2
3L	13537385	13544000	masterList	A4	rep2
3L	13744030	13751456	masterList	A4	rep2
3L	14496519	14509500	masterList	A4	rep2
3L	16563499	16565000	masterList	A4	rep2
3L	19608500	19610500	masterList	A4	rep2
3L	19678500	19679500	masterList	A4	rep2
3L	19801373	19851500	masterList	A4	rep2
3L	19958953	19967364	masterList	A4	rep2
3L	21093000	21095612	masterList	A4	rep2
3L	21401500	21407000	masterList	A4	rep2
3L	21742000	21744500	masterList	A4	rep2
3L	22227500	22234000	masterList	A4	rep2
3L	22654000	22660000	masterList	A4	rep2
3L	23153216	23227136	masterList	A4	rep2
3L	23354500	23395500	masterList	A4	rep2
3L	23531000	23535370	masterList	A4	rep2
3L	23578500	23581000	masterList	A4	rep2
3L	23728000	23740500	masterList	A4	rep2
3L	23771500	23777193	masterList	A4	rep2
3L	23951598	23966786	masterList	A4	rep2
3L	23987568	24002723	masterList	A4	rep2
3L	24043517	24127102	masterList	A4	rep2
3L	24169038	24262893	masterList	A4	rep2
3L	24331930	24431582	masterList	A4	rep2
3L	25046971	25136988	masterList	A4	rep2
3L	25152590	25157271	masterList	A4	rep2
3L	25166410	25231123	masterList	A4	rep2
3L	25267500	25321500	masterList	A4	rep2
3L	25385000	25463000	masterList	A4	rep2
3L	25510635	25535500	masterList	A4	rep2
3L	25788500	25832692	masterList	A4	rep2
3L	25842133	25856000	masterList	A4	rep2
3L	26001000	26002000	masterList	A4	rep2
3L	26009000	26014000	masterList	A4	rep2
3L	26023000	26026000	masterList	A4	rep2
3L	26031000	26049506	masterList	A4	rep2
3L	26082279	26106000	masterList	A4	rep2
3L	26409000	26441500	masterList	A4	rep2
3L	26452000	26460000	masterList	A4	rep2
3L	26517000	26523500	masterList	A4	rep2
3L	26551005	26566000	masterList	A4	rep2
3L	26571000	26574000	masterList	A4	rep2
3L	26640000	26644500	masterList	A4	rep2
3L	26978468	26984500	masterList	A4	rep2
3L	27071500	27072500	masterList	A4	rep2
3L	27091500	27125634	masterList	A4	rep2
3L	27213500	27431312	masterList	A4	rep2
3L	28155000	28179915	masterList	A4	rep2
3L	28207500	28211472	masterList	A4	rep2
3L	28694000	28722500	masterList	A4	rep2
3L	28800113	28846070	masterList	A4	rep2
3R	810744	975296	masterList	A4	rep2
3R	1060000	1073566	masterList	A4	rep2
3R	1075000	1076000	masterList	A4	rep2
3R	1298771	1477180	masterList	A4	rep2
3R	1557000	1565000	masterList	A4	rep2
3R	1880673	1887000	masterList	A4	rep2
3R	1940239	1943297	masterList	A4	rep2
3R	2121156	2264372	masterList	A4	rep2
3R	2811000	2812000	masterList	A4	rep2
3R	2830500	2936000	masterList	A4	rep2
3R	3260909	3299228	masterList	A4	rep2
3R	3503000	3510000	masterList	A4	rep2
3R	3620743	3630000	masterList	A4	rep2
3R	3677529	3963960	masterList	A4	rep2
3R	4039000	4041000	masterList	A4	rep2
3R	4295272	4300418	masterList	A4	rep2
3R	4308170	4358000	masterList	A4	rep2
3R	4413500	4415895	masterList	A4	rep2
3R	4421517	4515000	masterList	A4	rep2
3R	4603000	4671000	masterList	A4	rep2
3R	4882000	4883500	masterList	A4	rep2
3R	4885000	4908012	masterList	A4	rep2
3R	5374500	5384500	masterList	A4	rep2
3R	5672000	5684899	masterList	A4	rep2
3R	5955609	5960956	masterList	A4	rep2
3R	6793000	6800287	masterList	A4	rep2
3R	6840561	6844138	masterList	A4	rep2
3R	8369362	8376000	masterList	A4	rep2
3R	9704000	9705000	masterList	A4	rep2
3R	9857302	9862801	masterList	A4	rep2
3R	10759076	10766553	masterList	A4	rep2
3R	10906000	10907500	masterList	A4	rep2
3R	11379000	11388000	masterList	A4	rep2
3R	11785000	11789000	masterList	A4	rep2
3R	12042258	12044500	masterList	A4	rep2
3R	12531500	12537000	masterList	A4	rep2
3R	12539000	12542500	masterList	A4	rep2
3R	12543500	12545500	masterList	A4	rep2
3R	12760804	12768135	masterList	A4	rep2
3R	13063500	13065500	masterList	A4	rep2
3R	13079500	13084000	masterList	A4	rep2
3R	13101500	13112500	masterList	A4	rep2
3R	14233340	14240000	masterList	A4	rep2
3R	14280078	14285923	masterList	A4	rep2
3R	15890000	15894500	masterList	A4	rep2
3R	17537203	17552404	masterList	A4	rep2
3R	19565000	19570741	masterList	A4	rep2
3R	22408187	22414500	masterList	A4	rep2
3R	23806296	23810500	masterList	A4	rep2
3R	24415000	24416000	masterList	A4	rep2
3R	24534547	24540434	masterList	A4	rep2
3R	25101142	25108596	masterList	A4	rep2
3R	26011126	26023563	masterList	A4	rep2
3R	26031082	26037000	masterList	A4	rep2
3R	28259611	28265106	masterList	A4	rep2
3R	28753097	28760546	masterList	A4	rep2
3R	28965991	28971078	masterList	A4	rep2
3R	30934000	30944500	masterList	A4	rep2
3R	32035510	32043114	masterList	A4	rep2
3R	32642000	32656647	masterList	A4	rep2
3R	32732500	32733500	masterList	A4	rep2
4	111500	147500	masterList	A4	rep2
4	148515	150000	masterList	A4	rep2
4	318393	324500	masterList	A4	rep2
4	533854	542800	masterList	A4	rep2
4	590677	597102	masterList	A4	rep2
4	636786	643506	masterList	A4	rep2
4	683904	692302	masterList	A4	rep2
4	747277	748287	masterList	A4	rep2
4	752098	759291	masterList	A4	rep2
4	783026	795500	masterList	A4	rep2
4	814166	820078	masterList	A4	rep2
4	848043	853059	masterList	A4	rep2
4	968682	1050543	masterList	A4	rep2
4	1128560	1133384	masterList	A4	rep2
4	1243500	1247711	masterList	A4	rep2
4	1309500	1338500	masterList	A4	rep2
U_16	21500	28500	masterList	A4	rep2
U_16	90500	92500	masterList	A4	rep2
U_19	45500	46500	masterList	A4	rep2
U_35	39500	40500	masterList	A4	rep2
U_37	31500	47000	masterList	A4	rep2
U_39	8000	10000	masterList	A4	rep2
U_39	90000	109500	masterList	A4	rep2
U_43	8000	9000	masterList	A4	rep2
U_45	17000	32000	masterList	A4	rep2
U_46	5000	6000	masterList	A4	rep2
U_47	8500	20000	masterList	A4	rep2
U_50	500	46000	masterList	A4	rep2
U_56	36500	38000	masterList	A4	rep2
U_62	0	17500	masterList	A4	rep2
U_65	15500	40639	masterList	A4	rep2
U_69	2	28421	masterList	A4	rep2
U_70	8000	9500	masterList	A4	rep2
U_71	15500	16500	masterList	A4	rep2
U_74	4	41409	masterList	A4	rep2
U_76	39500	41000	masterList	A4	rep2
U_85	3000	18500	masterList	A4	rep2
X	12	69000	masterList	A4	rep2
X	439246	454744	masterList	A4	rep2
X	468319	482000	masterList	A4	rep2
X	926112	936000	masterList	A4	rep2
X	1615000	1622000	masterList	A4	rep2
X	2703661	2711008	masterList	A4	rep2
X	2955994	2957007	masterList	A4	rep2
X	3212500	3228538	masterList	A4	rep2
X	3339258	3344500	masterList	A4	rep2
X	3368000	3378500	masterList	A4	rep2
X	3979905	3986892	masterList	A4	rep2
X	4064500	4070000	masterList	A4	rep2
X	5712609	5716691	masterList	A4	rep2
X	6203000	6206632	masterList	A4	rep2
X	6571651	6574681	masterList	A4	rep2
X	8279803	8284654	masterList	A4	rep2
X	8796000	8797000	masterList	A4	rep2
X	9647394	9649000	masterList	A4	rep2
X	10594437	10600234	masterList	A4	rep2
X	10989244	10991868	masterList	A4	rep2
X	11101186	11106799	masterList	A4	rep2
X	11177626	11184914	masterList	A4	rep2
X	12103659	12108000	masterList	A4	rep2
X	12397391	12399499	masterList	A4	rep2
X	12437000	12438500	masterList	A4	rep2
X	12602999	12604930	masterList	A4	rep2
X	13323204	13328772	masterList	A4	rep2
X	15267226	15274714	masterList	A4	rep2
X	15611149	15612599	masterList	A4	rep2
X	16007500	16047400	masterList	A4	rep2
X	16248848	16253755	masterList	A4	rep2
X	17179000	17184000	masterList	A4	rep2
X	18059940	18062301	masterList	A4	rep2
X	18494653	18511376	masterList	A4	rep2
X	19141761	19145072	masterList	A4	rep2
X	20659000	20660000	masterList	A4	rep2
X	20977150	20989320	masterList	A4	rep2
X	21153000	21158363	masterList	A4	rep2
X	21242312	21245000	masterList	A4	rep2
X	21505583	21531500	masterList	A4	rep2
X	21586000	21590173	masterList	A4	rep2
X	21604000	21874000	masterList	A4	rep2
X	21922500	22007500	masterList	A4	rep2
X	22198500	22199500	masterList	A4	rep2
X	22236000	22248000	masterList	A4	rep2
X	22256908	22360205	masterList	A4	rep2
X	22421000	22513500	masterList	A4	rep2
X	22728392	22736000	masterList	A4	rep2
X	22958906	23045338	masterList	A4	rep2
X	23201337	23420580	masterList	A4	rep2
X	23582500	23583500	masterList	A4	rep2
X	23594361	23609254	masterList	A4	rep2
2L	2623744	2626730	masterList	A7	rep1
2L	4948238	4954181	masterList	A7	rep1
2L	5649669	5654000	masterList	A7	rep1
2L	7822242	7824026	masterList	A7	rep1
2L	8085429	8088159	masterList	A7	rep1
2L	8470000	8471500	masterList	A7	rep1
2L	8733714	8750282	masterList	A7	rep1
2L	9045000	9053256	masterList	A7	rep1
2L	9724000	9726000	masterList	A7	rep1
2L	9742500	9746000	masterList	A7	rep1
2L	9875000	9876500	masterList	A7	rep1
[truncated: 3,352 more rows]

## Sheet: restrictive
4	71440	72521	restrictive	A1	rep1
4	1281000	1306500	restrictive	A1	rep1
4	1298365	1306327	restrictive	A1	rep1
2L	329500	334500	restrictive	A1	rep1
2L	408500	414000	restrictive	A1	rep1
2L	417000	420500	restrictive	A1	rep1
2L	421500	423500	restrictive	A1	rep1
2L	721000	723500	restrictive	A1	rep1
2L	2262000	2263500	restrictive	A1	rep1
2L	2416500	2421000	restrictive	A1	rep1
2L	4152000	4154000	restrictive	A1	rep1
2L	4227000	4231500	restrictive	A1	rep1
2L	4758000	4759000	restrictive	A1	rep1
2L	4953500	4955500	restrictive	A1	rep1
2L	4954178	4959612	restrictive	A1	rep1
2L	4956500	4959500	restrictive	A1	rep1
2L	4970500	4973000	restrictive	A1	rep1
2L	4974500	4980500	restrictive	A1	rep1
2L	4998000	4999500	restrictive	A1	rep1
2L	5012500	5017500	restrictive	A1	rep1
2L	7817834	7819652	restrictive	A1	rep1
2L	8355170	8355878	restrictive	A1	rep1
2L	8747500	8764500	restrictive	A1	rep1
2L	9768000	9772000	restrictive	A1	rep1
2L	9775000	9777000	restrictive	A1	rep1
2L	9793500	9797000	restrictive	A1	rep1
2L	10051000	10061500	restrictive	A1	rep1
2L	10454000	10457500	restrictive	A1	rep1
2L	10459000	10465500	restrictive	A1	rep1
2L	10613500	10619000	restrictive	A1	rep1
2L	10674500	10689000	restrictive	A1	rep1
2L	10826500	10827500	restrictive	A1	rep1
2L	11382000	11383000	restrictive	A1	rep1
2L	11620000	11626500	restrictive	A1	rep1
2L	12999500	13006500	restrictive	A1	rep1
2L	13632500	13635000	restrictive	A1	rep1
2L	13749000	13751000	restrictive	A1	rep1
2L	13872000	13874000	restrictive	A1	rep1
2L	13887500	13890500	restrictive	A1	rep1
2L	13891500	13895500	restrictive	A1	rep1
2L	14605500	14607000	restrictive	A1	rep1
2L	14672500	14674500	restrictive	A1	rep1
2L	16061000	16063000	restrictive	A1	rep1
2L	16196500	16197500	restrictive	A1	rep1
2L	18061500	18063000	restrictive	A1	rep1
2L	18100000	18104000	restrictive	A1	rep1
2L	18304000	18304500	restrictive	A1	rep1
2L	18353000	18353500	restrictive	A1	rep1
2L	18456500	18459500	restrictive	A1	rep1
2L	19211000	19212000	restrictive	A1	rep1
2L	19558000	19559500	restrictive	A1	rep1
2L	20210000	20268500	restrictive	A1	rep1
2L	20216357	20274108	restrictive	A1	rep1
2L	20298500	20299500	restrictive	A1	rep1
2L	21315500	21324500	restrictive	A1	rep1
2L	21567500	21603500	restrictive	A1	rep1
2L	21599318	21603651	restrictive	A1	rep1
2L	21909500	21912000	restrictive	A1	rep1
2L	22252500	22253000	restrictive	A1	rep1
2L	22294500	22316000	restrictive	A1	rep1
2L	22358000	22384000	restrictive	A1	rep1
2L	22815014	22817378	restrictive	A1	rep1
2L	22857000	22857500	restrictive	A1	rep1
2L	23011500	23064000	restrictive	A1	rep1
2L	23161000	23346500	restrictive	A1	rep1
2L	23365500	23366000	restrictive	A1	rep1
2R	126000	126500	restrictive	A1	rep1
2R	700500	701000	restrictive	A1	rep1
2R	760000	764500	restrictive	A1	rep1
2R	954000	957500	restrictive	A1	rep1
2R	1744500	1745000	restrictive	A1	rep1
2R	2513500	2514000	restrictive	A1	rep1
2R	2597000	2608000	restrictive	A1	rep1
2R	2741000	2815000	restrictive	A1	rep1
2R	3050000	3075000	restrictive	A1	rep1
2R	3091000	3091500	restrictive	A1	rep1
2R	3171000	3171500	restrictive	A1	rep1
2R	3227000	3231500	restrictive	A1	rep1
2R	3316000	3358000	restrictive	A1	rep1
2R	3584000	3586000	restrictive	A1	rep1
2R	4179500	4208000	restrictive	A1	rep1
2R	4392735	4393260	restrictive	A1	rep1
2R	4714500	4780500	restrictive	A1	rep1
2R	5086500	5130000	restrictive	A1	rep1
2R	6128000	6254000	restrictive	A1	rep1
2R	6168587	6448040	restrictive	A1	rep1
2R	6328000	6452500	restrictive	A1	rep1
2R	6727000	6729000	restrictive	A1	rep1
2R	7078000	7080500	restrictive	A1	rep1
2R	8278500	8284500	restrictive	A1	rep1
2R	8286000	8292500	restrictive	A1	rep1
2R	8359000	8362000	restrictive	A1	rep1
2R	8364000	8367000	restrictive	A1	rep1
2R	8368500	8372500	restrictive	A1	rep1
2R	8373500	8382000	restrictive	A1	rep1
2R	8383500	8389000	restrictive	A1	rep1
2R	12691500	12695500	restrictive	A1	rep1
2R	12696500	12698500	restrictive	A1	rep1
2R	13209500	13211500	restrictive	A1	rep1
2R	13695500	13697500	restrictive	A1	rep1
2R	14116500	14118000	restrictive	A1	rep1
2R	14266000	14268500	restrictive	A1	rep1
2R	14938500	14939500	restrictive	A1	rep1
2R	16416000	16424500	restrictive	A1	rep1
2R	16455500	16464000	restrictive	A1	rep1
2R	16491500	16492500	restrictive	A1	rep1
2R	16505500	16510500	restrictive	A1	rep1
2R	16520000	16522000	restrictive	A1	rep1
2R	16672500	16676500	restrictive	A1	rep1
2R	17974500	17976000	restrictive	A1	rep1
2R	17980500	17982500	restrictive	A1	rep1
2R	17984000	17985500	restrictive	A1	rep1
2R	18978500	18980500	restrictive	A1	rep1
2R	19284500	19288000	restrictive	A1	rep1
2R	19704000	19705000	restrictive	A1	rep1
2R	20806000	20807000	restrictive	A1	rep1
2R	21755500	21787500	restrictive	A1	rep1
2R	22768500	22777000	restrictive	A1	rep1
2R	24019378	24024136	restrictive	A1	rep1
2R	24411500	24413500	restrictive	A1	rep1
2R	24807243	24809546	restrictive	A1	rep1
2R	24825857	24826947	restrictive	A1	rep1
2R	24882500	24884500	restrictive	A1	rep1
2R	24887000	24888000	restrictive	A1	rep1
2R	24890500	24893500	restrictive	A1	rep1
2R	24890676	24907473	restrictive	A1	rep1
2R	25081000	25097000	restrictive	A1	rep1
2R	25155000	25170000	restrictive	A1	rep1
2R	25157211	25169888	restrictive	A1	rep1
3L	1118000	1129500	restrictive	A1	rep1
3L	2082000	2083000	restrictive	A1	rep1
3L	2696000	2697000	restrictive	A1	rep1
3L	3144840	3155523	restrictive	A1	rep1
3L	4063500	4076500	restrictive	A1	rep1
3L	5193500	5196000	restrictive	A1	rep1
3L	5994500	5998000	restrictive	A1	rep1
3L	6000500	6002000	restrictive	A1	rep1
3L	6010000	6014000	restrictive	A1	rep1
3L	6020500	6022500	restrictive	A1	rep1
3L	6035000	6035500	restrictive	A1	rep1
3L	8329500	8336500	restrictive	A1	rep1
3L	8576000	8598000	restrictive	A1	rep1
3L	8684500	8690000	restrictive	A1	rep1
3L	8691000	8694000	restrictive	A1	rep1
3L	8747000	8752500	restrictive	A1	rep1
3L	9425947	9428128	restrictive	A1	rep1
3L	10389500	10397500	restrictive	A1	rep1
3L	10420000	10422500	restrictive	A1	rep1
3L	11203000	11207000	restrictive	A1	rep1
3L	12004000	12005000	restrictive	A1	rep1
3L	12855500	12860000	restrictive	A1	rep1
3L	13282500	13284000	restrictive	A1	rep1
3L	13285000	13286000	restrictive	A1	rep1
3L	13377500	13381000	restrictive	A1	rep1
3L	13972500	13975500	restrictive	A1	rep1
3L	16734000	16735000	restrictive	A1	rep1
3L	19040500	19042500	restrictive	A1	rep1
3L	19688000	19689500	restrictive	A1	rep1
3L	19845000	19926000	restrictive	A1	rep1
3L	20829000	20830500	restrictive	A1	rep1
3L	22061500	22063500	restrictive	A1	rep1
3L	23039000	23115500	restrictive	A1	rep1
3L	23215500	23259500	restrictive	A1	rep1
3L	23380500	23426000	restrictive	A1	rep1
3L	24433000	24576500	restrictive	A1	rep1
3L	24530973	24576664	restrictive	A1	rep1
3L	24707000	24875000	restrictive	A1	rep1
3L	24897500	24940500	restrictive	A1	rep1
3L	25428000	25505000	restrictive	A1	rep1
3L	26029500	26109000	restrictive	A1	rep1
3L	26128500	26129000	restrictive	A1	rep1
3L	26299000	26311000	restrictive	A1	rep1
3L	26574500	26576000	restrictive	A1	rep1
3L	26707500	26788000	restrictive	A1	rep1
3L	27544000	27545000	restrictive	A1	rep1
3L	27793500	27828500	restrictive	A1	rep1
3L	27889719	27897064	restrictive	A1	rep1
3L	27980500	27981000	restrictive	A1	rep1
3R	37000	37500	restrictive	A1	rep1
3R	705500	708000	restrictive	A1	rep1
3R	770500	835500	restrictive	A1	rep1
3R	895500	973000	restrictive	A1	rep1
3R	1183500	1207000	restrictive	A1	rep1
3R	1782000	1877500	restrictive	A1	rep1
3R	1909500	1910000	restrictive	A1	rep1
3R	2359500	2417000	restrictive	A1	rep1
3R	2559500	2560000	restrictive	A1	rep1
3R	2615000	2671500	restrictive	A1	rep1
3R	2912500	2961000	restrictive	A1	rep1
3R	3342000	3345000	restrictive	A1	rep1
3R	3394500	3465500	restrictive	A1	rep1
3R	3767000	3857000	restrictive	A1	rep1
3R	3892500	4008000	restrictive	A1	rep1
3R	4814000	4868500	restrictive	A1	rep1
3R	5245500	5267500	restrictive	A1	rep1
3R	6192000	6200500	restrictive	A1	rep1
3R	7230500	7243000	restrictive	A1	rep1
3R	7255000	7258500	restrictive	A1	rep1
3R	7260500	7263500	restrictive	A1	rep1
3R	7264500	7267000	restrictive	A1	rep1
3R	7269500	7270500	restrictive	A1	rep1
3R	7538000	7541500	restrictive	A1	rep1
3R	9455000	9456000	restrictive	A1	rep1
3R	10376500	10377000	restrictive	A1	rep1
3R	12536000	12537000	restrictive	A1	rep1
3R	12932000	12939000	restrictive	A1	rep1
3R	13637500	13641000	restrictive	A1	rep1
3R	13962000	13984000	restrictive	A1	rep1
3R	14119500	14125500	restrictive	A1	rep1
3R	15235000	15238500	restrictive	A1	rep1
3R	15576000	15581500	restrictive	A1	rep1
3R	16013000	16016500	restrictive	A1	rep1
3R	19185000	19185500	restrictive	A1	rep1
3R	19233500	19234000	restrictive	A1	rep1
3R	19292000	19293000	restrictive	A1	rep1
3R	19695500	19696500	restrictive	A1	rep1
3R	19836000	19840500	restrictive	A1	rep1
3R	19841500	19843500	restrictive	A1	rep1
3R	20474000	20486500	restrictive	A1	rep1
3R	20799500	20800000	restrictive	A1	rep1
3R	21770500	21773500	restrictive	A1	rep1
3R	21790500	21808000	restrictive	A1	rep1
3R	22232000	22233500	restrictive	A1	rep1
3R	22239000	22252000	restrictive	A1	rep1
3R	22787500	22796000	restrictive	A1	rep1
3R	23559000	23559500	restrictive	A1	rep1
3R	23870500	23879500	restrictive	A1	rep1
3R	24206500	24209000	restrictive	A1	rep1
3R	24215500	24223000	restrictive	A1	rep1
3R	24226000	24230500	restrictive	A1	rep1
3R	26026000	26029000	restrictive	A1	rep1
3R	26199000	26208500	restrictive	A1	rep1
3R	26344500	26347500	restrictive	A1	rep1
3R	26747000	26752500	restrictive	A1	rep1
3R	27504500	27508000	restrictive	A1	rep1
3R	27510000	27513000	restrictive	A1	rep1
3R	27823500	27825000	restrictive	A1	rep1
3R	27991000	27992000	restrictive	A1	rep1
3R	28920000	28920500	restrictive	A1	rep1
3R	30855000	30860000	restrictive	A1	rep1
3R	30953500	30959500	restrictive	A1	rep1
3R	31096500	31098500	restrictive	A1	rep1
3R	31351500	31358500	restrictive	A1	rep1
3R	31695803	31699482	restrictive	A1	rep1
3R	32058342	32074616	restrictive	A1	rep1
3R	32208761	32210273	restrictive	A1	rep1
U_10	0	2000	restrictive	A1	rep1
U_10	65500	66000	restrictive	A1	rep1
U_17	5000	25134	restrictive	A1	rep1
U_21	0	18500	restrictive	A1	rep1
U_24	0	500	restrictive	A1	rep1
U_24	56000	61000	restrictive	A1	rep1
U_25	121000	121500	restrictive	A1	rep1
U_32	7500	18500	restrictive	A1	rep1
U_41	73000	73500	restrictive	A1	rep1
U_47	16500	29500	restrictive	A1	rep1
U_47	52000	59985	restrictive	A1	rep1
U_48	97500	99000	restrictive	A1	rep1
U_48	118500	119000	restrictive	A1	rep1
U_51	2000	8000	restrictive	A1	rep1
U_53	129000	141847	restrictive	A1	rep1
U_54	33000	35429	restrictive	A1	rep1
U_56	0	500	restrictive	A1	rep1
U_59	90500	105500	restrictive	A1	rep1
U_65	0	500	restrictive	A1	rep1
U_66	0	2500	restrictive	A1	rep1
U_67	61500	62000	restrictive	A1	rep1
X	1048000	1049500	restrictive	A1	rep1
X	1229000	1234500	restrictive	A1	rep1
X	1229954	1230726	restrictive	A1	rep1
X	1424000	1424500	restrictive	A1	rep1
X	3184000	3200500	restrictive	A1	rep1
X	3196632	3199914	restrictive	A1	rep1
X	3196693	3199823	restrictive	A1	rep1
X	4026000	4033000	restrictive	A1	rep1
X	5500500	5504000	restrictive	A1	rep1
X	5729000	5743000	restrictive	A1	rep1
X	7739500	7746000	restrictive	A1	rep1
X	8346000	8405000	restrictive	A1	rep1
X	9079500	9081000	restrictive	A1	rep1
X	9184500	9185000	restrictive	A1	rep1
X	9693500	9697500	restrictive	A1	rep1
X	9966000	9970500	restrictive	A1	rep1
X	10011500	10012500	restrictive	A1	rep1
X	10026500	10030000	restrictive	A1	rep1
X	10636500	10647000	restrictive	A1	rep1
X	10673266	10693908	restrictive	A1	rep1
X	12448000	12449500	restrictive	A1	rep1
X	13228500	13235500	restrictive	A1	rep1
X	13681000	13683500	restrictive	A1	rep1
X	14089000	14097000	restrictive	A1	rep1
X	14098500	14102000	restrictive	A1	rep1
X	14173500	14193500	restrictive	A1	rep1
X	17093000	17098500	restrictive	A1	rep1
X	18038500	18042500	restrictive	A1	rep1
X	18996500	18997500	restrictive	A1	rep1
X	19009500	19010500	restrictive	A1	rep1
X	20169000	20169500	restrictive	A1	rep1
X	20671500	20672500	restrictive	A1	rep1
X	21487500	21522000	restrictive	A1	rep1
X	21573500	21689000	restrictive	A1	rep1
X	21703000	21797500	restrictive	A1	rep1
X	21972000	22001000	restrictive	A1	rep1
X	22096500	22151000	restrictive	A1	rep1
X	22172500	22292000	restrictive	A1	rep1
X	22404500	22405000	restrictive	A1	rep1
X	22458500	22471500	restrictive	A1	rep1
X	22511000	22513500	restrictive	A1	rep1
X	23496000	23496500	restrictive	A1	rep1
X	23546000	23610000	restrictive	A1	rep1
X	23638500	23640000	restrictive	A1	rep1
X	23842500	23853000	restrictive	A1	rep1
X	23912500	23913000	restrictive	A1	rep1
X	23962500	23963000	restrictive	A1	rep1
4	6000	6500	restrictive	A1	rep2
4	71440	72521	restrictive	A1	rep2
4	107500	150000	restrictive	A1	rep2
4	981000	1064500	restrictive	A1	rep2
4	1277000	1306500	restrictive	A1	rep2
4	1298365	1306327	restrictive	A1	rep2
2L	1658000	1658500	restrictive	A1	rep2
2L	2172500	2173000	restrictive	A1	rep2
2L	3769500	3770000	restrictive	A1	rep2
2L	4227500	4231500	restrictive	A1	rep2
2L	4954000	4959500	restrictive	A1	rep2
2L	4954178	4959612	restrictive	A1	rep2
2L	7817834	7819652	restrictive	A1	rep2
2L	8263500	8264000	restrictive	A1	rep2
2L	8355170	8355878	restrictive	A1	rep2
2L	8975000	8975500	restrictive	A1	rep2
2L	9793500	9797000	restrictive	A1	rep2
2L	13089500	13090500	restrictive	A1	rep2
2L	13442500	13443500	restrictive	A1	rep2
2L	13914500	13915000	restrictive	A1	rep2
2L	18061500	18063000	restrictive	A1	rep2
2L	18725500	18726500	restrictive	A1	rep2
2L	19555500	19559500	restrictive	A1	rep2
2L	19660500	19662000	restrictive	A1	rep2
2L	20003500	20004000	restrictive	A1	rep2
2L	20176500	20192500	restrictive	A1	rep2
2L	20209500	20275000	restrictive	A1	rep2
2L	20216357	20274108	restrictive	A1	rep2
2L	21599000	21603500	restrictive	A1	rep2
2L	21599318	21603651	restrictive	A1	rep2
2L	21648000	21649000	restrictive	A1	rep2
2L	22356500	22383000	restrictive	A1	rep2
2L	22436000	22436500	restrictive	A1	rep2
2L	22480000	22484500	restrictive	A1	rep2
2L	22815014	22817378	restrictive	A1	rep2
2L	22857000	22859500	restrictive	A1	rep2
2L	22966000	22966500	restrictive	A1	rep2
2L	23011500	23064500	restrictive	A1	rep2
2L	23144500	23145000	restrictive	A1	rep2
2L	23161000	23345500	restrictive	A1	rep2
2L	23365500	23366000	restrictive	A1	rep2
2R	163000	163500	restrictive	A1	rep2
2R	216000	216500	restrictive	A1	rep2
2R	760000	762000	restrictive	A1	rep2
2R	1231000	1231500	restrictive	A1	rep2
2R	2127000	2128500	restrictive	A1	rep2
2R	2525000	2554500	restrictive	A1	rep2
2R	2597000	2610500	restrictive	A1	rep2
2R	2740500	2822500	restrictive	A1	rep2
2R	3049500	3056500	restrictive	A1	rep2
2R	3227000	3231500	restrictive	A1	rep2
2R	3255500	3256000	restrictive	A1	rep2
2R	3316000	3356500	restrictive	A1	rep2
2R	3584000	3586000	restrictive	A1	rep2
2R	3660500	3661000	restrictive	A1	rep2
2R	4178500	4243000	restrictive	A1	rep2
2R	4392735	4393260	restrictive	A1	rep2
2R	4714500	4864000	restrictive	A1	rep2
2R	5676000	5694000	restrictive	A1	rep2
2R	6149500	6254000	restrictive	A1	rep2
2R	6168587	6448040	restrictive	A1	rep2
2R	6296500	6297000	restrictive	A1	rep2
2R	6319000	6458500	restrictive	A1	rep2
2R	8450500	8452500	restrictive	A1	rep2
2R	9035000	9039500	restrictive	A1	rep2
2R	9047500	9051500	restrictive	A1	rep2
2R	9207500	9208000	restrictive	A1	rep2
2R	12694000	12695500	restrictive	A1	rep2
2R	12696500	12698500	restrictive	A1	rep2
2R	12896500	12897500	restrictive	A1	rep2
2R	13737000	13738000	restrictive	A1	rep2
2R	14116000	14117500	restrictive	A1	rep2
2R	14882500	14883000	restrictive	A1	rep2
2R	16303500	16304000	restrictive	A1	rep2
2R	16491500	16492500	restrictive	A1	rep2
2R	16787000	16788500	restrictive	A1	rep2
2R	16792500	16794500	restrictive	A1	rep2
2R	18792500	18793000	restrictive	A1	rep2
2R	19581500	19582000	restrictive	A1	rep2
2R	19754000	19754500	restrictive	A1	rep2
2R	22769500	22777000	restrictive	A1	rep2
2R	24019378	24024136	restrictive	A1	rep2
2R	24019500	24025500	restrictive	A1	rep2
2R	24807243	24809546	restrictive	A1	rep2
2R	24825857	24826947	restrictive	A1	rep2
2R	24890676	24907473	restrictive	A1	rep2
2R	25157000	25170000	restrictive	A1	rep2
2R	25157211	25169888	restrictive	A1	rep2
3L	1371000	1371500	restrictive	A1	rep2
3L	1390500	1391000	restrictive	A1	rep2
3L	3144840	3155523	restrictive	A1	rep2
3L	3910500	3911500	restrictive	A1	rep2
3L	6035000	6035500	restrictive	A1	rep2
3L	7154500	7155500	restrictive	A1	rep2
3L	8683500	8693000	restrictive	A1	rep2
3L	8747000	8747500	restrictive	A1	rep2
3L	9425947	9428128	restrictive	A1	rep2
3L	9681000	9681500	restrictive	A1	rep2
3L	9993000	9993500	restrictive	A1	rep2
3L	11180000	11181000	restrictive	A1	rep2
3L	11203000	11206500	restrictive	A1	rep2
3L	11823000	11824000	restrictive	A1	rep2
3L	14180000	14180500	restrictive	A1	rep2
3L	15575000	15575500	restrictive	A1	rep2
3L	15686000	15686500	restrictive	A1	rep2
3L	15820000	15821000	restrictive	A1	rep2
3L	16690500	16691000	restrictive	A1	rep2
3L	17485000	17486000	restrictive	A1	rep2
3L	17740500	17741000	restrictive	A1	rep2
3L	18136000	18136500	restrictive	A1	rep2
3L	18569000	18570000	restrictive	A1	rep2
3L	18654000	18654500	restrictive	A1	rep2
3L	19035000	19035500	restrictive	A1	rep2
3L	19160000	19161000	restrictive	A1	rep2
3L	19688000	19690000	restrictive	A1	rep2
3L	20741500	20742000	restrictive	A1	rep2
3L	21012500	21024000	restrictive	A1	rep2
3L	21808000	21811500	restrictive	A1	rep2
3L	21815500	21823000	restrictive	A1	rep2
3L	23215500	23260500	restrictive	A1	rep2
3L	23443500	23450000	restrictive	A1	rep2
3L	24432500	24577000	restrictive	A1	rep2
3L	24530973	24576664	restrictive	A1	rep2
3L	24670000	24696000	restrictive	A1	rep2
3L	24707500	24876000	restrictive	A1	rep2
3L	24897500	24937500	restrictive	A1	rep2
3L	24980000	24981000	restrictive	A1	rep2
3L	26046000	26129000	restrictive	A1	rep2
3L	26176500	26219000	restrictive	A1	rep2
3L	26299000	26311000	restrictive	A1	rep2
3L	26711500	26746000	restrictive	A1	rep2
3L	26966500	26997000	restrictive	A1	rep2
3L	27472500	27481000	restrictive	A1	rep2
3L	27726000	27726500	restrictive	A1	rep2
3L	27745500	27828000	restrictive	A1	rep2
3L	27889719	27897064	restrictive	A1	rep2
3R	32500	37500	restrictive	A1	rep2
3R	564500	636000	restrictive	A1	rep2
3R	706500	736000	restrictive	A1	rep2
3R	770500	841000	restrictive	A1	rep2
3R	1054500	1094500	restrictive	A1	rep2
3R	1183500	1192000	restrictive	A1	rep2
3R	1360000	1370000	restrictive	A1	rep2
3R	1900500	1901000	restrictive	A1	rep2
3R	2026500	2027000	restrictive	A1	rep2
3R	2356000	2412500	restrictive	A1	rep2
3R	2478500	2479000	restrictive	A1	rep2
3R	2559500	2560000	restrictive	A1	rep2
3R	2614000	2710500	restrictive	A1	rep2
3R	2731500	2740500	restrictive	A1	rep2
3R	3394500	3465500	restrictive	A1	rep2
3R	3757500	3857000	restrictive	A1	rep2
3R	3892500	4008000	restrictive	A1	rep2
3R	4035500	4064000	restrictive	A1	rep2
3R	4250000	4328500	restrictive	A1	rep2
3R	4817000	4840500	restrictive	A1	rep2
3R	5245000	5277000	restrictive	A1	rep2
3R	9455000	9456000	restrictive	A1	rep2
3R	10221500	10222000	restrictive	A1	rep2
3R	10337000	10338000	restrictive	A1	rep2
3R	10349000	10349500	restrictive	A1	rep2
3R	10551500	10552000	restrictive	A1	rep2
3R	12932000	12936500	restrictive	A1	rep2
3R	14054500	14055000	restrictive	A1	rep2
3R	14121500	14125500	restrictive	A1	rep2
3R	15577000	15581500	restrictive	A1	rep2
3R	15986000	15986500	restrictive	A1	rep2
3R	19233500	19234000	restrictive	A1	rep2
3R	19539500	19543000	restrictive	A1	rep2
3R	21034000	21035500	restrictive	A1	rep2
3R	21321500	21323000	restrictive	A1	rep2
3R	21770500	21773500	restrictive	A1	rep2
3R	22212500	22213500	restrictive	A1	rep2
3R	22787500	22794000	restrictive	A1	rep2
3R	23307000	23308000	restrictive	A1	rep2
3R	24256000	24259500	restrictive	A1	rep2
3R	26026500	26027500	restrictive	A1	rep2
3R	26202000	26206000	restrictive	A1	rep2
3R	30387500	30388500	restrictive	A1	rep2
3R	31695500	31699500	restrictive	A1	rep2
3R	31695803	31699482	restrictive	A1	rep2
3R	32058342	32074616	restrictive	A1	rep2
3R	32208761	32210273	restrictive	A1	rep2
U_10	0	2000	restrictive	A1	rep2
U_11	19000	43380	restrictive	A1	rep2
U_17	5000	25134	restrictive	A1	rep2
U_21	0	18500	restrictive	A1	rep2
U_24	28000	28500	restrictive	A1	rep2
U_25	58500	61000	restrictive	A1	rep2
U_27	4000	11000	restrictive	A1	rep2
U_32	7500	18500	restrictive	A1	rep2
U_42	500	12500	restrictive	A1	rep2
U_47	12500	29500	restrictive	A1	rep2
U_48	97500	99000	restrictive	A1	rep2
U_48	118500	119104	restrictive	A1	rep2
U_49	0	1500	restrictive	A1	rep2
U_5	5500	23387	restrictive	A1	rep2
U_54	33000	35429	restrictive	A1	rep2
U_56	0	500	restrictive	A1	rep2
U_58	7500	8000	restrictive	A1	rep2
U_59	26500	27500	restrictive	A1	rep2
U_65	0	1500	restrictive	A1	rep2
U_66	0	5000	restrictive	A1	rep2
U_69	500	4000	restrictive	A1	rep2
U_7	35500	44398	restrictive	A1	rep2
X	1229500	1234500	restrictive	A1	rep2
X	1229954	1230726	restrictive	A1	rep2
X	1424000	1424500	restrictive	A1	rep2
X	2109500	2110000	restrictive	A1	rep2
X	2929000	2929500	restrictive	A1	rep2
X	3184000	3200500	restrictive	A1	rep2
X	3196632	3199914	restrictive	A1	rep2
X	3196693	3199823	restrictive	A1	rep2
X	3602000	3602500	restrictive	A1	rep2
X	3636000	3636500	restrictive	A1	rep2
X	4026000	4033000	restrictive	A1	rep2
X	7478000	7478500	restrictive	A1	rep2
X	8367000	8368500	restrictive	A1	rep2
X	8369500	8371500	restrictive	A1	rep2
X	8372500	8374500	restrictive	A1	rep2
X	9184500	9185000	restrictive	A1	rep2
X	9411500	9412000	restrictive	A1	rep2
X	9695000	9697000	restrictive	A1	rep2
X	9716000	9716500	restrictive	A1	rep2
X	9966000	9970500	restrictive	A1	rep2
X	10011500	10012500	restrictive	A1	rep2
X	10641500	10647000	restrictive	A1	rep2
X	10673266	10693908	restrictive	A1	rep2
X	11474000	11475000	restrictive	A1	rep2
X	12639500	12655500	restrictive	A1	rep2
X	12789000	12789500	restrictive	A1	rep2
X	13230000	13235500	restrictive	A1	rep2
X	18038500	18040500	restrictive	A1	rep2
X	19187000	19187500	restrictive	A1	rep2
X	20036500	20037000	restrictive	A1	rep2
X	21186500	21187000	restrictive	A1	rep2
X	21253000	21253500	restrictive	A1	rep2
X	21488500	21522000	restrictive	A1	rep2
X	21591000	21797500	restrictive	A1	rep2
X	21874000	22001000	restrictive	A1	rep2
X	22404500	22405000	restrictive	A1	rep2
X	22506500	22512000	restrictive	A1	rep2
X	23038500	23141500	restrictive	A1	rep2
X	23549000	23575000	restrictive	A1	rep2
X	23593500	23610000	restrictive	A1	rep2
X	23842500	23859500	restrictive	A1	rep2
4	122500	138500	restrictive	A2	rep1
4	665500	674500	restrictive	A2	rep1
4	929000	1013000	restrictive	A2	rep1
4	968116	985708	restrictive	A2	rep1
4	987847	1002982	restrictive	A2	rep1
4	1258500	1259000	restrictive	A2	rep1
4	1372000	1372500	restrictive	A2	rep1
4	1459500	1473000	restrictive	A2	rep1
4	1522556	1548671	restrictive	A2	rep1
4	1523000	1568000	restrictive	A2	rep1
4	1588000	1589000	restrictive	A2	rep1
2L	31669	40605	restrictive	A2	rep1
2L	126333	133544	restrictive	A2	rep1
2L	816500	817000	restrictive	A2	rep1
2L	1513500	1520000	restrictive	A2	rep1
2L	1669500	1670000	restrictive	A2	rep1
2L	1742458	1744725	restrictive	A2	rep1
2L	2191500	2192000	restrictive	A2	rep1
2L	4268500	4272500	restrictive	A2	rep1
2L	5142500	5143000	restrictive	A2	rep1
2L	6039609	6043685	restrictive	A2	rep1
2L	7882329	7884818	restrictive	A2	rep1
2L	7882500	7889000	restrictive	A2	rep1
2L	9822500	9831000	restrictive	A2	rep1
2L	10885500	10887000	restrictive	A2	rep1
2L	13016000	13019000	restrictive	A2	rep1
2L	13046000	13047500	restrictive	A2	rep1
2L	13456000	13457000	restrictive	A2	rep1
2L	13903500	13904000	restrictive	A2	rep1
2L	14467000	14476500	restrictive	A2	rep1
2L	16278500	16279000	restrictive	A2	rep1
2L	17996000	17997500	restrictive	A2	rep1
2L	19487000	19488500	restrictive	A2	rep1
2L	19593000	19594500	restrictive	A2	rep1
2L	20107000	20133000	restrictive	A2	rep1
2L	20153606	20215368	restrictive	A2	rep1
2L	20154000	20213500	restrictive	A2	rep1
2L	21563500	21568000	restrictive	A2	rep1
2L	21624000	21624500	restrictive	A2	rep1
2L	22066000	22166500	restrictive	A2	rep1
2L	22140259	22154363	restrictive	A2	rep1
2L	22477500	22478000	restrictive	A2	rep1
2L	22574847	22579921	restrictive	A2	rep1
2L	22590450	22595622	restrictive	A2	rep1
2L	22688000	22688500	restrictive	A2	rep1
2L	22853500	22856500	restrictive	A2	rep1
2L	23071500	23136000	restrictive	A2	rep1
2L	23102396	23105024	restrictive	A2	rep1
2L	23111529	23121976	restrictive	A2	rep1
2L	23163000	23163500	restrictive	A2	rep1
2L	23207000	23282000	restrictive	A2	rep1
2L	23221935	23277652	restrictive	A2	rep1
2L	23304460	23348087	restrictive	A2	rep1
2L	23306500	23356000	restrictive	A2	rep1
2L	23367500	23390000	restrictive	A2	rep1
2R	179500	195500	restrictive	A2	rep1
2R	305000	305500	restrictive	A2	rep1
2R	474000	475500	restrictive	A2	rep1
2R	816000	817000	restrictive	A2	rep1
2R	878000	878500	restrictive	A2	rep1
2R	1725500	1754000	restrictive	A2	rep1
2R	2006000	2024500	restrictive	A2	rep1
2R	2098000	2098500	restrictive	A2	rep1
2R	2195000	2195500	restrictive	A2	rep1
2R	2252500	2359500	restrictive	A2	rep1
2R	2295655	2296547	restrictive	A2	rep1
2R	2306394	2310071	restrictive	A2	rep1
2R	2409500	2425000	restrictive	A2	rep1
2R	2511500	2626500	restrictive	A2	rep1
2R	2514676	2519339	restrictive	A2	rep1
2R	2594399	2604738	restrictive	A2	rep1
2R	2725500	2884500	restrictive	A2	rep1
2R	3140000	3162500	restrictive	A2	rep1
2R	3174000	3191500	restrictive	A2	rep1
2R	3360000	3360500	restrictive	A2	rep1
2R	3650000	3652000	restrictive	A2	rep1
2R	3779500	3903500	restrictive	A2	rep1
2R	3892304	3904430	restrictive	A2	rep1
2R	3918500	3975500	restrictive	A2	rep1
2R	3948664	3958310	restrictive	A2	rep1
2R	4080000	4085500	restrictive	A2	rep1
2R	4293500	4294000	restrictive	A2	rep1
2R	4428000	4566500	restrictive	A2	rep1
2R	4437688	4500257	restrictive	A2	rep1
2R	4741500	4754000	restrictive	A2	rep1
2R	5097000	5097500	restrictive	A2	rep1
2R	5796438	6070924	restrictive	A2	rep1
2R	5797500	5926000	restrictive	A2	rep1
2R	5945500	6048000	restrictive	A2	rep1
2R	6254500	6255000	restrictive	A2	rep1
2R	8634500	8637500	restrictive	A2	rep1
2R	9051000	9051500	restrictive	A2	rep1
2R	9062500	9063000	restrictive	A2	rep1
2R	12254000	12255000	restrictive	A2	rep1
2R	12450000	12450500	restrictive	A2	rep1
2R	13316500	13317000	restrictive	A2	rep1
2R	13703000	13704500	restrictive	A2	rep1
2R	13845471	13848171	restrictive	A2	rep1
2R	13845500	13848000	restrictive	A2	rep1
2R	13973500	13974000	restrictive	A2	rep1
2R	14078000	14079000	restrictive	A2	rep1
2R	16030000	16031500	restrictive	A2	rep1
2R	16045000	16047500	restrictive	A2	rep1
2R	17642000	17644500	restrictive	A2	rep1
2R	19104000	19104500	restrictive	A2	rep1
2R	19688500	19693000	restrictive	A2	rep1
2R	20005500	20006000	restrictive	A2	rep1
2R	20580500	20582000	restrictive	A2	rep1
2R	22263500	22271500	restrictive	A2	rep1
2R	22317000	22318500	restrictive	A2	rep1
2R	23526500	23531500	restrictive	A2	rep1
2R	24357500	24358500	restrictive	A2	rep1
2R	24464000	24464500	restrictive	A2	rep1
2R	24686500	24715500	restrictive	A2	rep1
3L	7142500	7143500	restrictive	A2	rep1
3L	8613449	8620315	restrictive	A2	rep1
3L	8614000	8620000	restrictive	A2	rep1
3L	8709000	8709500	restrictive	A2	rep1
3L	9354941	9357937	restrictive	A2	rep1
3L	11565351	11568258	restrictive	A2	rep1
3L	11699000	11701500	restrictive	A2	rep1
3L	11704000	11706000	restrictive	A2	rep1
3L	13275500	13276500	restrictive	A2	rep1
3L	15378000	15378500	restrictive	A2	rep1
3L	18980500	18981000	restrictive	A2	rep1
3L	19439500	19441000	restrictive	A2	rep1
3L	19509500	19512000	restrictive	A2	rep1
3L	19629500	19637000	restrictive	A2	rep1
3L	21234067	21239255	restrictive	A2	rep1
3L	21574500	21577500	restrictive	A2	rep1
3L	21581500	21589000	restrictive	A2	rep1
3L	21582340	21586248	restrictive	A2	rep1
3L	21839500	21841500	restrictive	A2	rep1
3L	22185000	22185500	restrictive	A2	rep1
3L	22551500	22553000	restrictive	A2	rep1
3L	22838500	22839000	restrictive	A2	rep1
3L	22996500	23037000	restrictive	A2	rep1
3L	23191000	23202000	restrictive	A2	rep1
3L	23394000	23415500	restrictive	A2	rep1
3L	23501000	23519500	restrictive	A2	rep1
3L	23659500	23664000	restrictive	A2	rep1
3L	23903500	23904000	restrictive	A2	rep1
3L	24207500	24208500	restrictive	A2	rep1
3L	24369000	24370500	restrictive	A2	rep1
3L	24575500	24597500	restrictive	A2	rep1
3L	24695000	24696000	restrictive	A2	rep1
3L	24721000	24721500	restrictive	A2	rep1
3L	24740000	24740500	restrictive	A2	rep1
3L	24841000	24843000	restrictive	A2	rep1
3L	25082575	25095285	restrictive	A2	rep1
3L	25087500	25093000	restrictive	A2	rep1
3L	25171000	25218500	restrictive	A2	rep1
3L	25171381	25216028	restrictive	A2	rep1
3L	25258883	25291146	restrictive	A2	rep1
3L	25261500	25325000	restrictive	A2	rep1
3L	25335500	25349000	restrictive	A2	rep1
3L	25374500	25452500	restrictive	A2	rep1
3L	25483500	25533500	restrictive	A2	rep1
3L	25484156	25500966	restrictive	A2	rep1
3L	25545000	25545500	restrictive	A2	rep1
3L	25563500	25566500	restrictive	A2	rep1
3L	25594500	25595500	restrictive	A2	rep1
3L	25824500	25825000	restrictive	A2	rep1
3L	25872000	25902500	restrictive	A2	rep1
3L	25938000	25945500	restrictive	A2	rep1
3L	25985000	26015500	restrictive	A2	rep1
3L	26186000	26201000	restrictive	A2	rep1
3L	26213500	26234500	restrictive	A2	rep1
3L	26322000	26322500	restrictive	A2	rep1
3L	26337500	26338000	restrictive	A2	rep1
3L	26750500	26754500	restrictive	A2	rep1
3L	26807000	26817500	restrictive	A2	rep1
3L	26844000	26851000	restrictive	A2	rep1
3L	27504500	27534000	restrictive	A2	rep1
3L	27787500	27798000	restrictive	A2	rep1
3L	27822000	27861000	restrictive	A2	rep1
3L	27896500	27897000	restrictive	A2	rep1
3L	28151000	28152000	restrictive	A2	rep1
3L	28536000	28536500	restrictive	A2	rep1
3L	28635500	28636000	restrictive	A2	rep1
3L	28941500	28948500	restrictive	A2	rep1
3R	53000	53500	restrictive	A2	rep1
3R	81500	82000	restrictive	A2	rep1
3R	119500	120000	restrictive	A2	rep1
3R	331500	332000	restrictive	A2	rep1
3R	534500	600500	restrictive	A2	rep1
3R	614500	618000	restrictive	A2	rep1
3R	752000	752500	restrictive	A2	rep1
3R	847301	1056225	restrictive	A2	rep1
3R	853500	900500	restrictive	A2	rep1
3R	916500	982500	restrictive	A2	rep1
3R	993500	1055000	restrictive	A2	rep1
3R	1090500	1091000	restrictive	A2	rep1
3R	1348000	1348500	restrictive	A2	rep1
3R	1529500	1561000	restrictive	A2	rep1
3R	1852000	1883500	restrictive	A2	rep1
3R	2065000	2065500	restrictive	A2	rep1
3R	2399500	2400500	restrictive	A2	rep1
3R	2417000	2418500	restrictive	A2	rep1
3R	2429500	2432000	restrictive	A2	rep1
3R	2494500	2520000	restrictive	A2	rep1
3R	2670000	2706500	restrictive	A2	rep1
3R	2729000	2787000	restrictive	A2	rep1
3R	3197000	3197500	restrictive	A2	rep1
3R	3249500	3254500	restrictive	A2	rep1
3R	3347500	3379500	restrictive	A2	rep1
3R	3439000	3439500	restrictive	A2	rep1
3R	3743500	3744000	restrictive	A2	rep1
3R	3760885	3915876	restrictive	A2	rep1
3R	3761000	3815000	restrictive	A2	rep1
3R	3826000	3878500	restrictive	A2	rep1
3R	3896500	3924000	restrictive	A2	rep1
3R	3997000	4023000	restrictive	A2	rep1
3R	3997137	4022506	restrictive	A2	rep1
3R	4112000	4134500	restrictive	A2	rep1
3R	6805500	6806000	restrictive	A2	rep1
3R	7249500	7253000	restrictive	A2	rep1
3R	7255500	7257500	restrictive	A2	rep1
3R	7259000	7261500	restrictive	A2	rep1
3R	7263500	7264500	restrictive	A2	rep1
3R	8100500	8102000	restrictive	A2	rep1
3R	9551500	9552500	restrictive	A2	rep1
3R	9780500	9782000	restrictive	A2	rep1
3R	10302000	10302500	restrictive	A2	rep1
3R	10327500	10328000	restrictive	A2	rep1
3R	11356500	11358500	restrictive	A2	rep1
3R	11362000	11363000	restrictive	A2	rep1
3R	12676000	12693000	restrictive	A2	rep1
3R	12809000	12813500	restrictive	A2	rep1
3R	13981000	13984500	restrictive	A2	rep1
3R	14292000	14293500	restrictive	A2	rep1
3R	15427000	15432000	restrictive	A2	rep1
3R	17652500	17653500	restrictive	A2	rep1
3R	18036500	18041500	restrictive	A2	rep1
3R	19113500	19115500	restrictive	A2	rep1
3R	20538500	20539500	restrictive	A2	rep1
3R	21152000	21152500	restrictive	A2	rep1
3R	26942000	26942500	restrictive	A2	rep1
3R	29167500	29168000	restrictive	A2	rep1
3R	29298000	29300000	restrictive	A2	rep1
3R	32177500	32184500	restrictive	A2	rep1
breed	0	18826	restrictive	A2	rep1
U_103	10500	24136	restrictive	A2	rep1
U_105	6500	32901	restrictive	A2	rep1
U_106	11500	18500	restrictive	A2	rep1
U_108	12000	26000	restrictive	A2	rep1
U_116	32000	33000	restrictive	A2	rep1
U_123	21500	22000	restrictive	A2	rep1
U_13	500	1500	restrictive	A2	rep1
U_15	9500	10000	restrictive	A2	rep1
U_15	59500	60000	restrictive	A2	rep1
U_154	79500	117642	restrictive	A2	rep1
U_155	3500	4000	restrictive	A2	rep1
U_155	23500	29230	restrictive	A2	rep1
U_157	21000	21500	restrictive	A2	rep1
U_157	53500	54000	restrictive	A2	rep1
U_159	29000	38500	restrictive	A2	rep1
U_20	22500	23000	restrictive	A2	rep1
U_21	2500	3000	restrictive	A2	rep1
U_26	9500	10000	restrictive	A2	rep1
U_26	27000	58500	restrictive	A2	rep1
U_33	67500	68500	restrictive	A2	rep1
U_34	39000	46106	restrictive	A2	rep1
U_42	31500	36500	restrictive	A2	rep1
U_43	17500	18000	restrictive	A2	rep1
U_44	23000	23500	restrictive	A2	rep1
U_47	14500	15000	restrictive	A2	rep1
U_52	14500	15000	restrictive	A2	rep1
U_62	52500	56500	restrictive	A2	rep1
U_65	30500	31000	restrictive	A2	rep1
U_8	2500	33500	restrictive	A2	rep1
U_80	22000	25000	restrictive	A2	rep1
U_89	13500	15000	restrictive	A2	rep1
U_91	31000	31500	restrictive	A2	rep1
U_94	59500	60000	restrictive	A2	rep1
X	1370000	1376000	restrictive	A2	rep1
X	2048500	2116500	restrictive	A2	rep1
X	2066281	2072298	restrictive	A2	rep1
X	2906000	2906500	restrictive	A2	rep1
X	3148150	3153128	restrictive	A2	rep1
X	3302500	3303500	restrictive	A2	rep1
X	3952500	3959500	restrictive	A2	rep1
X	4635000	4635500	restrictive	A2	rep1
X	5592000	5605500	restrictive	A2	rep1
X	6537000	6537500	restrictive	A2	rep1
X	8160500	8163500	restrictive	A2	rep1
X	8161684	8167360	restrictive	A2	rep1
X	8164500	8167000	restrictive	A2	rep1
X	8704000	8705000	restrictive	A2	rep1
X	8934500	8936500	restrictive	A2	rep1
X	9160500	9161500	restrictive	A2	rep1
X	9412500	9413000	restrictive	A2	rep1
X	9427000	9428500	restrictive	A2	rep1
X	9755000	9760000	restrictive	A2	rep1
X	9818000	9819000	restrictive	A2	rep1
X	9934000	9934500	restrictive	A2	rep1
X	10415000	10419500	restrictive	A2	rep1
X	11458543	11460731	restrictive	A2	rep1
X	12206000	12208000	restrictive	A2	rep1
X	12245500	12247000	restrictive	A2	rep1
X	12397000	12413000	restrictive	A2	rep1
X	12591523	12612769	restrictive	A2	rep1
X	13168500	13169000	restrictive	A2	rep1
X	13444000	13444500	restrictive	A2	rep1
X	13681000	13682000	restrictive	A2	rep1
X	13807500	13815000	restrictive	A2	rep1
X	13892311	13904007	restrictive	A2	rep1
X	14721500	14723000	restrictive	A2	rep1
X	17684000	17690500	restrictive	A2	rep1
X	21047500	21083000	restrictive	A2	rep1
X	21141500	21194000	restrictive	A2	rep1
X	21220500	21247500	restrictive	A2	rep1
X	21277500	21326500	restrictive	A2	rep1
X	21412000	21412500	restrictive	A2	rep1
X	21432500	21433000	restrictive	A2	rep1
X	21485000	21485500	restrictive	A2	rep1
X	21497000	21497500	restrictive	A2	rep1
X	21513000	21521000	restrictive	A2	rep1
X	21548000	21548500	restrictive	A2	rep1
X	21560000	21560500	restrictive	A2	rep1
X	21684471	21687910	restrictive	A2	rep1
X	21791000	21803500	restrictive	A2	rep1
X	21887000	21887500	restrictive	A2	rep1
X	21983000	21984500	restrictive	A2	rep1
X	22041000	22041500	restrictive	A2	rep1
X	22098500	22099000	restrictive	A2	rep1
X	22152000	22175500	restrictive	A2	rep1
X	22298500	22299500	restrictive	A2	rep1
X	22351000	22351500	restrictive	A2	rep1
X	22425000	22425500	restrictive	A2	rep1
X	23100500	23101000	restrictive	A2	rep1
X	23224624	23226990	restrictive	A2	rep1
4	122500	138500	restrictive	A2	rep2
4	528000	534000	restrictive	A2	rep2
4	930500	1013000	restrictive	A2	rep2
4	968116	985708	restrictive	A2	rep2
4	987847	1002982	restrictive	A2	rep2
4	1372000	1372500	restrictive	A2	rep2
4	1459500	1473000	restrictive	A2	rep2
4	1494000	1494500	restrictive	A2	rep2
4	1522556	1548671	restrictive	A2	rep2
4	1523000	1568000	restrictive	A2	rep2
2L	27500	49000	restrictive	A2	rep2
2L	31669	40605	restrictive	A2	rep2
2L	91500	95500	restrictive	A2	rep2
2L	126333	133544	restrictive	A2	rep2
2L	1513500	1520000	restrictive	A2	rep2
2L	1669500	1670000	restrictive	A2	rep2
2L	1742458	1744725	restrictive	A2	rep2
2L	1742500	1744500	restrictive	A2	rep2
2L	2191500	2192000	restrictive	A2	rep2
2L	2875500	2876500	restrictive	A2	rep2
2L	4269000	4272500	restrictive	A2	rep2
2L	5105000	5106000	restrictive	A2	rep2
2L	6039609	6043685	restrictive	A2	rep2
2L	7006500	7007500	restrictive	A2	rep2
2L	7882329	7884818	restrictive	A2	rep2
2L	7882500	7890000	restrictive	A2	rep2
2L	9828000	9831000	restrictive	A2	rep2
2L	13046000	13047500	restrictive	A2	rep2
2L	13455500	13457000	restrictive	A2	rep2
2L	13593500	13594500	restrictive	A2	rep2
2L	13903500	13904000	restrictive	A2	rep2
2L	14467000	14476500	restrictive	A2	rep2
2L	14543000	14543500	restrictive	A2	rep2
2L	15298000	15298500	restrictive	A2	rep2
2L	17996000	17997500	restrictive	A2	rep2
2L	19487000	19488500	restrictive	A2	rep2
2L	19505500	19509500	restrictive	A2	rep2
2L	19593000	19594500	restrictive	A2	rep2
2L	20108500	20133000	restrictive	A2	rep2
2L	20153000	20213500	restrictive	A2	rep2
2L	20153606	20215368	restrictive	A2	rep2
2L	21563500	21568000	restrictive	A2	rep2
2L	21624000	21624500	restrictive	A2	rep2
2L	22066000	22166500	restrictive	A2	rep2
2L	22140259	22154363	restrictive	A2	rep2
2L	22574847	22579921	restrictive	A2	rep2
2L	22590450	22595622	restrictive	A2	rep2
2L	22853000	22856500	restrictive	A2	rep2
2L	23056000	23136000	restrictive	A2	rep2
2L	23102396	23105024	restrictive	A2	rep2
2L	23111529	23121976	restrictive	A2	rep2
2L	23163000	23163500	restrictive	A2	rep2
2L	23221935	23277652	restrictive	A2	rep2
2L	23297500	23390000	restrictive	A2	rep2
2L	23304460	23348087	restrictive	A2	rep2
2R	179000	196000	restrictive	A2	rep2
2R	305000	306000	restrictive	A2	rep2
2R	377000	377500	restrictive	A2	rep2
2R	474000	475500	restrictive	A2	rep2
2R	1217000	1235500	restrictive	A2	rep2
2R	1733500	1754000	restrictive	A2	rep2
2R	2006000	2024500	restrictive	A2	rep2
2R	2252500	2336000	restrictive	A2	rep2
2R	2295655	2296547	restrictive	A2	rep2
2R	2306394	2310071	restrictive	A2	rep2
2R	2384000	2391500	restrictive	A2	rep2
2R	2498000	2624000	restrictive	A2	rep2
2R	2514676	2519339	restrictive	A2	rep2
2R	2594399	2604738	restrictive	A2	rep2
2R	2725500	2885500	restrictive	A2	rep2
2R	2906500	2907000	restrictive	A2	rep2
2R	2976000	2976500	restrictive	A2	rep2
2R	2995000	2996000	restrictive	A2	rep2
2R	3025500	3066500	restrictive	A2	rep2
2R	3134500	3162500	restrictive	A2	rep2
2R	3174000	3191500	restrictive	A2	rep2
2R	3360000	3360500	restrictive	A2	rep2
2R	3377500	3378500	restrictive	A2	rep2
2R	3510000	3513500	restrictive	A2	rep2
2R	3531000	3531500	restrictive	A2	rep2
2R	3650000	3651500	restrictive	A2	rep2
2R	3758500	3973500	restrictive	A2	rep2
2R	3892304	3904430	restrictive	A2	rep2
2R	3948664	3958310	restrictive	A2	rep2
2R	4079000	4087500	restrictive	A2	rep2
2R	4293500	4294000	restrictive	A2	rep2
2R	4428000	4566500	restrictive	A2	rep2
2R	4437688	4500257	restrictive	A2	rep2
2R	4741500	4754000	restrictive	A2	rep2
2R	5796438	6070924	restrictive	A2	rep2
2R	5800500	6045500	restrictive	A2	rep2
2R	6254500	6255000	restrictive	A2	rep2
2R	7213500	7214500	restrictive	A2	rep2
2R	7985500	7987500	restrictive	A2	rep2
2R	8634000	8637500	restrictive	A2	rep2
2R	9062500	9063000	restrictive	A2	rep2
2R	10869500	10871500	restrictive	A2	rep2
2R	11337500	11338000	restrictive	A2	rep2
2R	12450000	12450500	restrictive	A2	rep2
2R	13316500	13317000	restrictive	A2	rep2
2R	13703000	13704500	restrictive	A2	rep2
2R	13845471	13848171	restrictive	A2	rep2
2R	13973500	13974000	restrictive	A2	rep2
2R	16030000	16031500	restrictive	A2	rep2
2R	16045000	16047500	restrictive	A2	rep2
2R	17644000	17644500	restrictive	A2	rep2
2R	18922500	18924000	restrictive	A2	rep2
2R	18926500	18927000	restrictive	A2	rep2
2R	19104000	19104500	restrictive	A2	rep2
2R	19220500	19222500	restrictive	A2	rep2
2R	20005500	20006000	restrictive	A2	rep2
2R	24357500	24358500	restrictive	A2	rep2
2R	24464000	24464500	restrictive	A2	rep2
2R	24686500	24715500	restrictive	A2	rep2
2R	24776500	24777000	restrictive	A2	rep2
3L	3116000	3121500	restrictive	A2	rep2
3L	5642000	5644500	restrictive	A2	rep2
3L	6138000	6138500	restrictive	A2	rep2
3L	7142500	7143500	restrictive	A2	rep2
3L	8612500	8620000	restrictive	A2	rep2
3L	8613449	8620315	restrictive	A2	rep2
3L	9354941	9357937	restrictive	A2	rep2
3L	11565351	11568258	restrictive	A2	rep2
3L	11699500	11701500	restrictive	A2	rep2
3L	11704000	11706000	restrictive	A2	rep2
3L	12593000	12593500	restrictive	A2	rep2
3L	13275500	13276500	restrictive	A2	rep2
3L	15378000	15378500	restrictive	A2	rep2
3L	18858500	18859000	restrictive	A2	rep2
3L	18980500	18981000	restrictive	A2	rep2
3L	19440000	19441000	restrictive	A2	rep2
3L	19509500	19510500	restrictive	A2	rep2
3L	19629500	19685000	restrictive	A2	rep2
3L	21234067	21239255	restrictive	A2	rep2
3L	21581500	21584000	restrictive	A2	rep2
3L	21582340	21586248	restrictive	A2	rep2
3L	22997000	23036500	restrictive	A2	rep2
3L	23105000	23106000	restrictive	A2	rep2
3L	23178500	23212500	restrictive	A2	rep2
3L	23247000	23247500	restrictive	A2	rep2
3L	23393500	23415500	restrictive	A2	rep2
3L	23501000	23501500	restrictive	A2	rep2
3L	23513500	23519500	restrictive	A2	rep2
3L	23874500	23875000	restrictive	A2	rep2
3L	23903500	23904000	restrictive	A2	rep2
3L	24369000	24370000	restrictive	A2	rep2
3L	24576000	24593000	restrictive	A2	rep2
3L	24822500	24825000	restrictive	A2	rep2
3L	25082575	25095285	restrictive	A2	rep2
3L	25087500	25093000	restrictive	A2	rep2
3L	25171000	25217500	restrictive	A2	rep2
3L	25171381	25216028	restrictive	A2	rep2
3L	25258883	25291146	restrictive	A2	rep2
3L	25261500	25349000	restrictive	A2	rep2
3L	25374500	25452500	restrictive	A2	rep2
3L	25483500	25537500	restrictive	A2	rep2
3L	25484156	25500966	restrictive	A2	rep2
3L	25559000	25566500	restrictive	A2	rep2
3L	25594500	25595000	restrictive	A2	rep2
3L	25874500	25902500	restrictive	A2	rep2
3L	25921000	25921500	restrictive	A2	rep2
3L	25936500	25946500	restrictive	A2	rep2
3L	25985000	26016000	restrictive	A2	rep2
3L	26186000	26201000	restrictive	A2	rep2
3L	26212500	26234500	restrictive	A2	rep2
3L	26383000	26383500	restrictive	A2	rep2
3L	26751000	26754500	restrictive	A2	rep2
3L	26807000	26817500	restrictive	A2	rep2
3L	26906500	26907000	restrictive	A2	rep2
3L	26990000	26990500	restrictive	A2	rep2
3L	27504500	27541500	restrictive	A2	rep2
3L	27787500	27798000	restrictive	A2	rep2
3L	27821500	27865000	restrictive	A2	rep2
3L	28788000	28788500	restrictive	A2	rep2
3L	28941500	28949500	restrictive	A2	rep2
3R	12000	12500	restrictive	A2	rep2
3R	64500	67500	restrictive	A2	rep2
3R	119500	120000	restrictive	A2	rep2
3R	454500	491500	restrictive	A2	rep2
3R	508000	521500	restrictive	A2	rep2
3R	534500	618000	restrictive	A2	rep2
3R	847301	1056225	restrictive	A2	rep2
3R	853000	900500	restrictive	A2	rep2
3R	916000	982500	restrictive	A2	rep2
3R	994000	1068000	restrictive	A2	rep2
3R	1228500	1229000	restrictive	A2	rep2
3R	1405500	1410500	restrictive	A2	rep2
3R	1518000	1560500	restrictive	A2	rep2
3R	1834000	1834500	restrictive	A2	rep2
3R	2400000	2400500	restrictive	A2	rep2
3R	2417000	2418500	restrictive	A2	rep2
3R	2429500	2432000	restrictive	A2	rep2
3R	2494500	2511000	restrictive	A2	rep2
3R	2626000	2658000	restrictive	A2	rep2
3R	2670000	2787000	restrictive	A2	rep2
3R	2889500	2905000	restrictive	A2	rep2
3R	3197000	3197500	restrictive	A2	rep2
3R	3344000	3378000	restrictive	A2	rep2
3R	3435000	3435500	restrictive	A2	rep2
3R	3742000	3742500	restrictive	A2	rep2
3R	3757500	3815000	restrictive	A2	rep2
3R	3760885	3915876	restrictive	A2	rep2
3R	3826000	3879000	restrictive	A2	rep2
3R	3896500	3915000	restrictive	A2	rep2
3R	3996000	4025000	restrictive	A2	rep2
3R	3997137	4022506	restrictive	A2	rep2
3R	4105500	4134500	restrictive	A2	rep2
3R	5136500	5137000	restrictive	A2	rep2
3R	7249500	7253000	restrictive	A2	rep2
3R	7255500	7257500	restrictive	A2	rep2
3R	7259000	7261500	restrictive	A2	rep2
3R	7263000	7265500	restrictive	A2	rep2
3R	9551500	9552500	restrictive	A2	rep2
3R	9780500	9781500	restrictive	A2	rep2
3R	10302000	10302500	restrictive	A2	rep2
3R	10327500	10328000	restrictive	A2	rep2
3R	11357000	11358500	restrictive	A2	rep2
3R	11362000	11363000	restrictive	A2	rep2
3R	12655000	12655500	restrictive	A2	rep2
3R	12689000	12696500	restrictive	A2	rep2
3R	12809000	12813000	restrictive	A2	rep2
3R	13981000	13984500	restrictive	A2	rep2
3R	14292000	14293500	restrictive	A2	rep2
3R	15427500	15432000	restrictive	A2	rep2
3R	15548000	15548500	restrictive	A2	rep2
3R	17650500	17653500	restrictive	A2	rep2
3R	19115000	19115500	restrictive	A2	rep2
3R	20538500	20539500	restrictive	A2	rep2
3R	21152000	21152500	restrictive	A2	rep2
3R	25869000	25870000	restrictive	A2	rep2
3R	30882000	30882500	restrictive	A2	rep2
3R	32177500	32184500	restrictive	A2	rep2
breed	0	18826	restrictive	A2	rep2
U_101	18500	22367	restrictive	A2	rep2
U_106	11500	18500	restrictive	A2	rep2
U_108	25500	26000	restrictive	A2	rep2
U_116	32000	33000	restrictive	A2	rep2
U_123	2500	3000	restrictive	A2	rep2
U_123	21500	22000	restrictive	A2	rep2
U_139	19500	22500	restrictive	A2	rep2
U_15	9500	10000	restrictive	A2	rep2
U_154	79500	117642	restrictive	A2	rep2
U_155	23500	29230	restrictive	A2	rep2
U_157	21000	21500	restrictive	A2	rep2
U_159	8000	8500	restrictive	A2	rep2
U_21	2500	3000	restrictive	A2	rep2
U_26	29500	41500	restrictive	A2	rep2
U_26	58000	58500	restrictive	A2	rep2
U_26	72500	83672	restrictive	A2	rep2
U_33	67500	68500	restrictive	A2	rep2
U_34	39000	46106	restrictive	A2	rep2
U_42	6500	7000	restrictive	A2	rep2
U_44	23000	23500	restrictive	A2	rep2
U_47	14500	15000	restrictive	A2	rep2
U_51	36000	36500	restrictive	A2	rep2
U_52	14500	15000	restrictive	A2	rep2
U_62	52500	56500	restrictive	A2	rep2
U_8	2500	33500	restrictive	A2	rep2
U_80	24500	25000	restrictive	A2	rep2
U_81	18500	19500	restrictive	A2	rep2
U_89	13500	15000	restrictive	A2	rep2
U_91	31000	31500	restrictive	A2	rep2
U_94	59500	60000	restrictive	A2	rep2
X	1370000	1376000	restrictive	A2	rep2
X	2053500	2111000	restrictive	A2	rep2
X	2066281	2072298	restrictive	A2	rep2
X	2906000	2906500	restrictive	A2	rep2
X	3148150	3153128	restrictive	A2	rep2
X	3302500	3303500	restrictive	A2	rep2
X	3952500	3959500	restrictive	A2	rep2
X	4635000	4635500	restrictive	A2	rep2
X	5368000	5369500	restrictive	A2	rep2
X	6621000	6621500	restrictive	A2	rep2
X	8097000	8097500	restrictive	A2	rep2
X	8161684	8167360	restrictive	A2	rep2
X	8162000	8163500	restrictive	A2	rep2
X	8164500	8166500	restrictive	A2	rep2
X	8167500	8171500	restrictive	A2	rep2
X	8704000	8705000	restrictive	A2	rep2
X	9012500	9013000	restrictive	A2	rep2
X	9160500	9161000	restrictive	A2	rep2
X	9412500	9413000	restrictive	A2	rep2
X	9427000	9428500	restrictive	A2	rep2
X	9580000	9580500	restrictive	A2	rep2
X	9604500	9605500	restrictive	A2	rep2
X	9660500	9661000	restrictive	A2	rep2
X	9755500	9760000	restrictive	A2	rep2
X	9800500	9801500	restrictive	A2	rep2
X	9818000	9819000	restrictive	A2	rep2
X	9934000	9934500	restrictive	A2	rep2
X	9986500	9987000	restrictive	A2	rep2
X	10414000	10419500	restrictive	A2	rep2
X	11244500	11245500	restrictive	A2	rep2
X	11458543	11460731	restrictive	A2	rep2
X	11676000	11676500	restrictive	A2	rep2
X	11994500	11995000	restrictive	A2	rep2
X	12157000	12157500	restrictive	A2	rep2
X	12245500	12247000	restrictive	A2	rep2
X	12397000	12398500	restrictive	A2	rep2
X	12411000	12413000	restrictive	A2	rep2
X	12591523	12612769	restrictive	A2	rep2
X	13168500	13169000	restrictive	A2	rep2
X	13681000	13681500	restrictive	A2	rep2
X	13807500	13815000	restrictive	A2	rep2
X	13892311	13904007	restrictive	A2	rep2
X	14721500	14723000	restrictive	A2	rep2
X	15883500	15888500	restrictive	A2	rep2
X	17684000	17685500	restrictive	A2	rep2
X	21047500	21083000	restrictive	A2	rep2
X	21141500	21199000	restrictive	A2	rep2
X	21220500	21326500	restrictive	A2	rep2
X	21485000	21485500	restrictive	A2	rep2
X	21497000	21497500	restrictive	A2	rep2
X	21513000	21521000	restrictive	A2	rep2
X	21596000	21596500	restrictive	A2	rep2
X	21661500	21704500	restrictive	A2	rep2
X	21684471	21687910	restrictive	A2	rep2
X	21732500	21733000	restrictive	A2	rep2
X	21785000	21803500	restrictive	A2	rep2
X	21980500	21984500	restrictive	A2	rep2
X	22133000	22133500	restrictive	A2	rep2
X	22149000	22175500	restrictive	A2	rep2
X	22275000	22275500	restrictive	A2	rep2
X	22332000	22335000	restrictive	A2	rep2
X	22760000	22764000	restrictive	A2	rep2
X	23224624	23226990	restrictive	A2	rep2
X	23429000	23429500	restrictive	A2	rep2
X	23638500	23639000	restrictive	A2	rep2
4	134000	150000	restrictive	A4	rep1
4	533854	542800	restrictive	A4	rep1
4	683904	687072	restrictive	A4	rep1
4	747277	748287	restrictive	A4	rep1
4	814166	820078	restrictive	A4	rep1
4	1246077	1247711	restrictive	A4	rep1
4	1294500	1339000	restrictive	A4	rep1
2L	11500	12000	restrictive	A4	rep1
2L	113500	117500	restrictive	A4	rep1
2L	1139500	1140500	restrictive	A4	rep1
2L	2178500	2179000	restrictive	A4	rep1
2L	2859000	2860500	restrictive	A4	rep1
2L	3677000	3678500	restrictive	A4	rep1
2L	4199500	4200500	restrictive	A4	rep1
2L	4237000	4239000	restrictive	A4	rep1
2L	6165000	6166000	restrictive	A4	rep1
2L	6988000	6989000	restrictive	A4	rep1
2L	8661500	8663000	restrictive	A4	rep1
2L	9792000	9800500	restrictive	A4	rep1
2L	17448000	17448500	restrictive	A4	rep1
2L	17973000	17974500	restrictive	A4	rep1
2L	18438500	18439500	restrictive	A4	rep1
2L	19453781	19455665	restrictive	A4	rep1
2L	20067000	20085500	restrictive	A4	rep1
2L	20068411	20085263	restrictive	A4	rep1
2L	20101137	20177305	restrictive	A4	rep1
2L	20103000	20174500	restrictive	A4	rep1
2L	20551500	20553500	restrictive	A4	rep1
2L	20565500	20566000	restrictive	A4	rep1
2L	20576500	20577000	restrictive	A4	rep1
2L	20847500	20848000	restrictive	A4	rep1
2L	21009000	21012000	restrictive	A4	rep1
2L	21572000	21572500	restrictive	A4	rep1
2L	21751383	21757219	restrictive	A4	rep1
2L	22478311	22551029	restrictive	A4	rep1
2L	22745000	22751500	restrictive	A4	rep1
2L	23313500	23371500	restrictive	A4	rep1
2L	23569000	23597000	restrictive	A4	rep1
2L	23612500	23637500	restrictive	A4	rep1
2R	619500	620000	restrictive	A4	rep1
2R	791000	791500	restrictive	A4	rep1
2R	832000	837000	restrictive	A4	rep1
2R	967000	967500	restrictive	A4	rep1
2R	1017000	1017500	restrictive	A4	rep1
2R	1169000	1169500	restrictive	A4	rep1
2R	1277000	1298500	restrictive	A4	rep1
2R	1427000	1427500	restrictive	A4	rep1
2R	2063000	2063500	restrictive	A4	rep1
2R	2190500	2192000	restrictive	A4	rep1
2R	2237500	2239000	restrictive	A4	rep1
2R	2570000	2596500	restrictive	A4	rep1
2R	3056000	3060000	restrictive	A4	rep1
2R	3138500	3139000	restrictive	A4	rep1
2R	3239500	3240000	restrictive	A4	rep1
2R	3254000	3343500	restrictive	A4	rep1
2R	3307048	3320257	restrictive	A4	rep1
2R	3628500	3629000	restrictive	A4	rep1
2R	3723500	3725000	restrictive	A4	rep1
2R	3741500	3743000	restrictive	A4	rep1
2R	4025263	4027561	restrictive	A4	rep1
2R	4074500	4101000	restrictive	A4	rep1
2R	4230000	4232000	restrictive	A4	rep1
2R	4502000	4502500	restrictive	A4	rep1
2R	4561500	4640000	restrictive	A4	rep1
2R	4596435	4638330	restrictive	A4	rep1
2R	4904500	4912000	restrictive	A4	rep1
2R	4910432	4911023	restrictive	A4	rep1
2R	4937277	4968279	restrictive	A4	rep1
2R	4937500	4987500	restrictive	A4	rep1
2R	6006910	6264424	restrictive	A4	rep1
2R	6008000	6096000	restrictive	A4	rep1
2R	6180000	6263500	restrictive	A4	rep1
2R	6471000	6471500	restrictive	A4	rep1
2R	7214000	7216500	restrictive	A4	rep1
2R	7390000	7390500	restrictive	A4	rep1
2R	9280000	9280500	restrictive	A4	rep1
2R	9768500	9769500	restrictive	A4	rep1
2R	11642500	11643000	restrictive	A4	rep1
2R	12530000	12565000	restrictive	A4	rep1
2R	12662500	12663000	restrictive	A4	rep1
2R	12696500	12736000	restrictive	A4	rep1
2R	12715590	12735267	restrictive	A4	rep1
2R	13542000	13542500	restrictive	A4	rep1
2R	13932000	13934000	restrictive	A4	rep1
2R	16291000	16292500	restrictive	A4	rep1
2R	16306000	16311500	restrictive	A4	rep1
2R	18574500	18580500	restrictive	A4	rep1
2R	19165500	19167000	restrictive	A4	rep1
2R	20333500	20334000	restrictive	A4	rep1
2R	24628000	24629000	restrictive	A4	rep1
2R	24959406	24973300	restrictive	A4	rep1
3L	591500	592500	restrictive	A4	rep1
3L	1285970	1286633	restrictive	A4	rep1
3L	1481559	1484679	restrictive	A4	rep1
3L	1512500	1513000	restrictive	A4	rep1
3L	2136000	2137000	restrictive	A4	rep1
3L	2247000	2248000	restrictive	A4	rep1
3L	3150500	3156000	restrictive	A4	rep1
3L	3567500	3568500	restrictive	A4	rep1
3L	5518000	5519000	restrictive	A4	rep1
3L	7597000	7597500	restrictive	A4	rep1
3L	8674486	8681455	restrictive	A4	rep1
3L	8675000	8681000	restrictive	A4	rep1
3L	9420187	9422531	restrictive	A4	rep1
3L	9631500	9633000	restrictive	A4	rep1
3L	11189000	11190500	restrictive	A4	rep1
3L	11625000	11629500	restrictive	A4	rep1
3L	13379000	13380000	restrictive	A4	rep1
3L	14497000	14509000	restrictive	A4	rep1
3L	16563500	16573000	restrictive	A4	rep1
3L	17553500	17554000	restrictive	A4	rep1
3L	17866000	17867000	restrictive	A4	rep1
3L	19678500	19679500	restrictive	A4	rep1
3L	19801000	19810000	restrictive	A4	rep1
3L	20181500	20182000	restrictive	A4	rep1
3L	20961500	20962000	restrictive	A4	rep1
3L	21401500	21407000	restrictive	A4	rep1
3L	21737500	21747000	restrictive	A4	rep1
3L	22654000	22660000	restrictive	A4	rep1
3L	23153216	23227136	restrictive	A4	rep1
3L	23179500	23224500	restrictive	A4	rep1
3L	23461000	23461500	restrictive	A4	rep1
3L	23548000	23549000	restrictive	A4	rep1
3L	23728500	23740500	restrictive	A4	rep1
3L	24444500	24445000	restrictive	A4	rep1
3L	25046971	25231123	restrictive	A4	rep1
3L	25093500	25215500	restrictive	A4	rep1
3L	25267500	25327500	restrictive	A4	rep1
3L	25788500	25856000	restrictive	A4	rep1
3L	26412000	26441500	restrictive	A4	rep1
3L	26452000	26460000	restrictive	A4	rep1
3L	26517000	26523500	restrictive	A4	rep1
3L	27091000	27123000	restrictive	A4	rep1
3L	27095839	27125634	restrictive	A4	rep1
3L	27213000	27410500	restrictive	A4	rep1
3L	27214739	27431312	restrictive	A4	rep1
3L	27554000	27554500	restrictive	A4	rep1
3L	27572000	27572500	restrictive	A4	rep1
3L	27731000	27731500	restrictive	A4	rep1
3L	28093500	28094000	restrictive	A4	rep1
3L	28437500	28438000	restrictive	A4	rep1
3L	28688000	28727500	restrictive	A4	rep1
3L	28800113	28846070	restrictive	A4	rep1
3L	28801500	28828500	restrictive	A4	rep1
3R	65500	66000	restrictive	A4	rep1
3R	158000	158500	restrictive	A4	rep1
3R	410500	411000	restrictive	A4	rep1
3R	1090000	1090500	restrictive	A4	rep1
3R	1376500	1474500	restrictive	A4	rep1
3R	1434467	1474919	restrictive	A4	rep1
3R	1556000	1565000	restrictive	A4	rep1
3R	1661500	1666500	restrictive	A4	rep1
3R	2161000	2161500	restrictive	A4	rep1
3R	2840500	2937500	restrictive	A4	rep1
3R	3679500	3686500	restrictive	A4	rep1
3R	3712000	3762000	restrictive	A4	rep1
3R	3785500	3786000	restrictive	A4	rep1
3R	3897000	3960500	restrictive	A4	rep1
3R	3924279	3950800	restrictive	A4	rep1
3R	4308170	4337033	restrictive	A4	rep1
3R	4421517	4489655	restrictive	A4	rep1
3R	4428500	4515000	restrictive	A4	rep1
3R	4604000	4677500	restrictive	A4	rep1
3R	4885500	4887000	restrictive	A4	rep1
3R	4889500	4893500	restrictive	A4	rep1
3R	4899500	4903500	restrictive	A4	rep1
3R	8823500	8824500	restrictive	A4	rep1
3R	10716000	10717000	restrictive	A4	rep1
3R	10906000	10907500	restrictive	A4	rep1
3R	11786000	11789000	restrictive	A4	rep1
3R	11790000	11792000	restrictive	A4	rep1
3R	13063500	13065500	restrictive	A4	rep1
3R	13079500	13084000	restrictive	A4	rep1
3R	13101500	13112500	restrictive	A4	rep1
3R	14426000	14428000	restrictive	A4	rep1
3R	14726000	14727000	restrictive	A4	rep1
3R	15890000	15895000	restrictive	A4	rep1
3R	20585000	20586000	restrictive	A4	rep1
3R	20907000	20907500	restrictive	A4	rep1
3R	21947000	21949000	restrictive	A4	rep1
3R	22693500	22694000	restrictive	A4	rep1
3R	22939000	22939500	restrictive	A4	rep1
3R	24025500	24027000	restrictive	A4	rep1
3R	24415000	24416000	restrictive	A4	rep1
3R	24904500	24905000	restrictive	A4	rep1
3R	25032000	25032500	restrictive	A4	rep1
3R	26412500	26414000	restrictive	A4	rep1
3R	27953000	27953500	restrictive	A4	rep1
3R	28966000	28970000	restrictive	A4	rep1
3R	31399500	31400000	restrictive	A4	rep1
3R	32188406	32229325	restrictive	A4	rep1
breed	0	18338	restrictive	A4	rep1
U_11	500	1000	restrictive	A4	rep1
U_12	79500	80000	restrictive	A4	rep1
U_12	118500	119000	restrictive	A4	rep1
U_15	0	500	restrictive	A4	rep1
U_16	21500	28500	restrictive	A4	rep1
U_16	68000	68500	restrictive	A4	rep1
U_16	90500	92500	restrictive	A4	rep1
U_19	45500	46500	restrictive	A4	rep1
U_23	0	500	restrictive	A4	rep1
U_25	0	500	restrictive	A4	rep1
U_26	75500	77759	restrictive	A4	rep1
U_37	31500	47000	restrictive	A4	rep1
U_37	69000	69500	restrictive	A4	rep1
U_39	90000	112429	restrictive	A4	rep1
U_41	21000	21500	restrictive	A4	rep1
U_43	7500	9000	restrictive	A4	rep1
U_44	23500	24000	restrictive	A4	rep1
U_46	5500	6000	restrictive	A4	rep1
U_47	8500	32131	restrictive	A4	rep1
U_48	20500	21000	restrictive	A4	rep1
U_49	29000	29500	restrictive	A4	rep1
U_54	40000	44798	restrictive	A4	rep1
U_56	37000	43883	restrictive	A4	rep1
U_59	36500	37000	restrictive	A4	rep1
U_60	52000	52500	restrictive	A4	rep1
U_61	0	500	restrictive	A4	rep1
U_62	0	17500	restrictive	A4	rep1
U_65	15500	16000	restrictive	A4	rep1
U_70	34000	34777	restrictive	A4	rep1
U_71	15500	26677	restrictive	A4	rep1
U_73	33500	36101	restrictive	A4	rep1
U_74	1000	1500	restrictive	A4	rep1
U_74	39500	40500	restrictive	A4	rep1
U_84	31500	46294	restrictive	A4	rep1
U_85	3000	18500	restrictive	A4	rep1
X	440500	452500	restrictive	A4	rep1
X	473500	482500	restrictive	A4	rep1
X	727000	727500	restrictive	A4	rep1
X	2591000	2593500	restrictive	A4	rep1
X	2956000	2957000	restrictive	A4	rep1
X	3212500	3229000	restrictive	A4	rep1
X	3224601	3228538	restrictive	A4	rep1
X	3368000	3378500	restrictive	A4	rep1
X	5131500	5134000	restrictive	A4	rep1
X	6571651	6574681	restrictive	A4	rep1
X	6572000	6575000	restrictive	A4	rep1
X	6698000	6698500	restrictive	A4	rep1
X	7903500	7904000	restrictive	A4	rep1
X	8279803	8284654	restrictive	A4	rep1
X	8280000	8284500	restrictive	A4	rep1
X	8796000	8796500	restrictive	A4	rep1
X	9096500	9097500	restrictive	A4	rep1
X	9514000	9514500	restrictive	A4	rep1
X	9909000	9909500	restrictive	A4	rep1
X	9939000	9939500	restrictive	A4	rep1
X	10595000	10599500	restrictive	A4	rep1
X	10598890	10599681	restrictive	A4	rep1
X	10989244	10991868	restrictive	A4	rep1
X	10990000	10991500	restrictive	A4	rep1
X	11443500	11444500	restrictive	A4	rep1
X	12397500	12399500	restrictive	A4	rep1
X	12437000	12438500	restrictive	A4	rep1
X	12602999	12604930	restrictive	A4	rep1
X	12603000	12605000	restrictive	A4	rep1
X	13561500	13563500	restrictive	A4	rep1
X	13562309	13563135	restrictive	A4	rep1
X	15611149	15612599	restrictive	A4	rep1
X	16248848	16253755	restrictive	A4	rep1
X	18059940	18062301	restrictive	A4	rep1
X	18060000	18061500	restrictive	A4	rep1
X	19638000	19639500	restrictive	A4	rep1
X	19773500	19775500	restrictive	A4	rep1
X	20977150	20989320	restrictive	A4	rep1
X	21128000	21128500	restrictive	A4	rep1
X	21505500	21531500	restrictive	A4	rep1
X	21604000	22008500	restrictive	A4	rep1
X	22127500	22128000	restrictive	A4	rep1
X	22229500	22248000	restrictive	A4	rep1
X	22421000	22514000	restrictive	A4	rep1
X	23582500	23583500	restrictive	A4	rep1
4	111500	147500	restrictive	A4	rep2
4	533854	542800	restrictive	A4	rep2
4	534000	541500	restrictive	A4	rep2
4	683904	687072	restrictive	A4	rep2
4	747277	748287	restrictive	A4	rep2
4	814166	820078	restrictive	A4	rep2
4	971000	1046500	restrictive	A4	rep2
4	1187500	1188500	restrictive	A4	rep2
4	1243500	1248500	restrictive	A4	rep2
4	1246077	1247711	restrictive	A4	rep2
4	1309500	1338500	restrictive	A4	rep2
2L	38000	61000	restrictive	A4	rep2
2L	113500	117500	restrictive	A4	rep2
2L	1674000	1674500	restrictive	A4	rep2
2L	2178500	2179000	restrictive	A4	rep2
2L	2859000	2860500	restrictive	A4	rep2
2L	3677000	3678500	restrictive	A4	rep2
2L	3771000	3771500	restrictive	A4	rep2
2L	4236000	4239000	restrictive	A4	rep2
2L	5086000	5087500	restrictive	A4	rep2
2L	7518000	7518500	restrictive	A4	rep2
2L	7850500	7858000	restrictive	A4	rep2
2L	8484500	8485500	restrictive	A4	rep2
2L	8494000	8495500	restrictive	A4	rep2
2L	8661500	8662500	restrictive	A4	rep2
2L	9797500	9800500	restrictive	A4	rep2
2L	10070500	10073000	restrictive	A4	rep2
2L	13848000	13848500	restrictive	A4	rep2
2L	16086000	16086500	restrictive	A4	rep2
2L	17415000	17415500	restrictive	A4	rep2
2L	17973000	17974500	restrictive	A4	rep2
2L	18438500	18439500	restrictive	A4	rep2
2L	19453781	19455665	restrictive	A4	rep2
2L	19454000	19455500	restrictive	A4	rep2
2L	20065500	20091000	restrictive	A4	rep2
2L	20068411	20085263	restrictive	A4	rep2
2L	20101137	20177305	restrictive	A4	rep2
2L	20103000	20174500	restrictive	A4	rep2
2L	21403000	21403500	restrictive	A4	rep2
2L	21524000	21524500	restrictive	A4	rep2
2L	21751383	21757219	restrictive	A4	rep2
2L	21751500	21766000	restrictive	A4	rep2
2L	22352000	22396500	restrictive	A4	rep2
2L	22478311	22551029	restrictive	A4	rep2
2L	22745000	22751500	restrictive	A4	rep2
2L	22808500	22857500	restrictive	A4	rep2
2L	22997000	22998000	restrictive	A4	rep2
2L	23062500	23075000	restrictive	A4	rep2
2L	23332000	23371000	restrictive	A4	rep2
2L	23568500	23597000	restrictive	A4	rep2
2L	23612500	23637000	restrictive	A4	rep2
2R	2000	3000	restrictive	A4	rep2
2R	408500	421500	restrictive	A4	rep2
2R	706000	710500	restrictive	A4	rep2
2R	832000	837000	restrictive	A4	rep2
2R	967000	967500	restrictive	A4	rep2
2R	1169000	1169500	restrictive	A4	rep2
2R	1277500	1297000	restrictive	A4	rep2
2R	1427000	1427500	restrictive	A4	rep2
2R	1445000	1445500	restrictive	A4	rep2
2R	1478500	1479000	restrictive	A4	rep2
2R	2163000	2164000	restrictive	A4	rep2
2R	2507500	2537000	restrictive	A4	rep2
2R	2551000	2552500	restrictive	A4	rep2
2R	2571500	2601000	restrictive	A4	rep2
2R	2710000	2714500	restrictive	A4	rep2
2R	2734000	2789000	restrictive	A4	rep2
2R	3057500	3061000	restrictive	A4	rep2
2R	3211500	3222000	restrictive	A4	rep2
2R	3239500	3240000	restrictive	A4	rep2
2R	3301500	3343500	restrictive	A4	rep2
2R	3307048	3320257	restrictive	A4	rep2
2R	3589500	3594500	restrictive	A4	rep2
2R	3741500	3743000	restrictive	A4	rep2
2R	4025263	4027561	restrictive	A4	rep2
2R	4076000	4101500	restrictive	A4	rep2
2R	4230500	4232500	restrictive	A4	rep2
2R	4417500	4418000	restrictive	A4	rep2
2R	4561500	4640500	restrictive	A4	rep2
2R	4596435	4638330	restrictive	A4	rep2
2R	4902500	4912000	restrictive	A4	rep2
2R	4910432	4911023	restrictive	A4	rep2
2R	4937277	4968279	restrictive	A4	rep2
2R	5996500	6114000	restrictive	A4	rep2
2R	6006910	6264424	restrictive	A4	rep2
2R	6180000	6267000	restrictive	A4	rep2
2R	6471000	6471500	restrictive	A4	rep2
2R	7390000	7390500	restrictive	A4	rep2
2R	8852000	8854500	restrictive	A4	rep2
2R	9280000	9280500	restrictive	A4	rep2
2R	12544000	12565000	restrictive	A4	rep2
2R	12662500	12663000	restrictive	A4	rep2
2R	12696500	12736000	restrictive	A4	rep2
2R	12715590	12735267	restrictive	A4	rep2
2R	13501000	13503000	restrictive	A4	rep2
2R	13932000	13933500	restrictive	A4	rep2
2R	16261000	16263500	restrictive	A4	rep2
2R	16291000	16292500	restrictive	A4	rep2
2R	16597000	16598500	restrictive	A4	rep2
2R	16973500	16974000	restrictive	A4	rep2
2R	18574500	18581000	restrictive	A4	rep2
2R	19349500	19350000	restrictive	A4	rep2
2R	19579500	19580000	restrictive	A4	rep2
2R	20333500	20334000	restrictive	A4	rep2
2R	22608000	22609500	restrictive	A4	rep2
2R	22649500	22650000	restrictive	A4	rep2
2R	23359000	23360000	restrictive	A4	rep2
2R	24518000	24518500	restrictive	A4	rep2
2R	24609500	24611500	restrictive	A4	rep2
2R	24628000	24629000	restrictive	A4	rep2
2R	24736000	24736500	restrictive	A4	rep2
2R	24959406	24973300	restrictive	A4	rep2
3L	334000	334500	restrictive	A4	rep2
3L	1285970	1286633	restrictive	A4	rep2
3L	1481559	1484679	restrictive	A4	rep2
3L	3150500	3157000	restrictive	A4	rep2
3L	3567500	3568500	restrictive	A4	rep2
3L	4381000	4381500	restrictive	A4	rep2
3L	5404500	5405000	restrictive	A4	rep2
3L	5518500	5519000	restrictive	A4	rep2
3L	6100000	6101500	restrictive	A4	rep2
3L	7171000	7172500	restrictive	A4	rep2
3L	7597000	7597500	restrictive	A4	rep2
3L	8674000	8681500	restrictive	A4	rep2
3L	8674486	8681455	restrictive	A4	rep2
3L	9420187	9422531	restrictive	A4	rep2
3L	10436500	10438500	restrictive	A4	rep2
3L	11031500	11032000	restrictive	A4	rep2
3L	11625500	11629500	restrictive	A4	rep2
3L	13217000	13217500	restrictive	A4	rep2
3L	13379000	13380000	restrictive	A4	rep2
3L	14496500	14509500	restrictive	A4	rep2
3L	17553500	17554000	restrictive	A4	rep2
3L	17866000	17866500	restrictive	A4	rep2
3L	17888500	17889000	restrictive	A4	rep2
3L	19144500	19145000	restrictive	A4	rep2
3L	19608500	19610500	restrictive	A4	rep2
3L	19678500	19679500	restrictive	A4	rep2
3L	19801000	19851500	restrictive	A4	rep2
3L	20442000	20442500	restrictive	A4	rep2
3L	20961500	20962000	restrictive	A4	rep2
3L	21742000	21744500	restrictive	A4	rep2
3L	23153216	23227136	restrictive	A4	rep2
3L	23179500	23224000	restrictive	A4	rep2
3L	23354500	23395500	restrictive	A4	rep2
3L	23704000	23705500	restrictive	A4	rep2
3L	23728000	23740500	restrictive	A4	rep2
3L	25046971	25231123	restrictive	A4	rep2
3L	25065000	25215500	restrictive	A4	rep2
3L	25267500	25321500	restrictive	A4	rep2
3L	25339500	25340500	restrictive	A4	rep2
3L	25359500	25360500	restrictive	A4	rep2
3L	25385000	25463000	restrictive	A4	rep2
3L	25788500	25856000	restrictive	A4	rep2
3L	25930000	25930500	restrictive	A4	rep2
3L	26409000	26441500	restrictive	A4	rep2
3L	27091500	27122500	restrictive	A4	rep2
3L	27095839	27125634	restrictive	A4	rep2
3L	27213500	27410500	restrictive	A4	rep2
3L	27214739	27431312	restrictive	A4	rep2
3L	28694000	28722500	restrictive	A4	rep2
3L	28800113	28846070	restrictive	A4	rep2
3L	28801500	28828500	restrictive	A4	rep2
3R	75500	76000	restrictive	A4	rep2
3R	252500	253000	restrictive	A4	rep2
3R	328500	329000	restrictive	A4	rep2
3R	410500	411000	restrictive	A4	rep2
3R	1059500	1060000	restrictive	A4	rep2
3R	1075000	1076000	restrictive	A4	rep2
3R	1090000	1090500	restrictive	A4	rep2
3R	1119000	1119500	restrictive	A4	rep2
3R	1434467	1474919	restrictive	A4	rep2
3R	1557000	1565000	restrictive	A4	rep2
3R	1579000	1579500	restrictive	A4	rep2
3R	1603500	1605500	restrictive	A4	rep2
3R	1692500	1694000	restrictive	A4	rep2
3R	1766000	1767000	restrictive	A4	rep2
3R	2830500	2936000	restrictive	A4	rep2
3R	3494500	3495500	restrictive	A4	rep2
3R	3679500	3685500	restrictive	A4	rep2
3R	3774500	3786000	restrictive	A4	rep2
3R	3811500	3842500	restrictive	A4	rep2
3R	3905500	3960500	restrictive	A4	rep2
3R	3924279	3950800	restrictive	A4	rep2
3R	4230000	4231000	restrictive	A4	rep2
3R	4308170	4337033	restrictive	A4	rep2
3R	4310000	4358000	restrictive	A4	rep2
3R	4421517	4489655	restrictive	A4	rep2
3R	4425500	4515000	restrictive	A4	rep2
3R	4603000	4671000	restrictive	A4	rep2
3R	4875000	4902500	restrictive	A4	rep2
3R	7022000	7022500	restrictive	A4	rep2
3R	7998000	8000500	restrictive	A4	rep2
3R	9862000	9863000	restrictive	A4	rep2
3R	10727500	10728500	restrictive	A4	rep2
3R	10906000	10907500	restrictive	A4	rep2
3R	11785000	11789000	restrictive	A4	rep2
3R	11791000	11793000	restrictive	A4	rep2
3R	12202500	12203000	restrictive	A4	rep2
3R	12531500	12537000	restrictive	A4	rep2
3R	12539000	12542500	restrictive	A4	rep2
3R	12543500	12545500	restrictive	A4	rep2
3R	13101500	13112500	restrictive	A4	rep2
3R	14425000	14428000	restrictive	A4	rep2
3R	15105000	15106000	restrictive	A4	rep2
3R	15890000	15894500	restrictive	A4	rep2
3R	20907000	20907500	restrictive	A4	rep2
3R	21507000	21508000	restrictive	A4	rep2
3R	21947000	21950000	restrictive	A4	rep2
3R	22376000	22376500	restrictive	A4	rep2
3R	22939000	22939500	restrictive	A4	rep2
3R	24415000	24416000	restrictive	A4	rep2
3R	24938500	24939000	restrictive	A4	rep2
3R	26413000	26414000	restrictive	A4	rep2
3R	31399500	31400000	restrictive	A4	rep2
3R	32188406	32229325	restrictive	A4	rep2
3R	32732500	32733500	restrictive	A4	rep2
breed	0	18338	restrictive	A4	rep2
U_12	118500	119000	restrictive	A4	rep2
U_15	0	500	restrictive	A4	rep2
U_16	21500	28500	restrictive	A4	rep2
U_16	90500	92500	restrictive	A4	rep2
U_16	108500	109000	restrictive	A4	rep2
U_16	154500	155000	restrictive	A4	rep2
U_19	45500	46500	restrictive	A4	rep2
U_23	34000	34500	restrictive	A4	rep2
U_23	110500	111000	restrictive	A4	rep2
U_25	0	500	restrictive	A4	rep2
U_28	49500	50000	restrictive	A4	rep2
U_28	70000	75320	restrictive	A4	rep2
U_37	46500	47000	restrictive	A4	rep2
U_37	69000	69500	restrictive	A4	rep2
U_39	8000	10000	restrictive	A4	rep2
U_41	21000	21500	restrictive	A4	rep2
U_43	8000	9000	restrictive	A4	rep2
U_44	23500	24000	restrictive	A4	rep2
U_45	17000	32000	restrictive	A4	rep2
U_46	5000	6000	restrictive	A4	rep2
U_47	8500	32131	restrictive	A4	rep2
U_51	30500	37294	restrictive	A4	rep2
U_54	40000	44798	restrictive	A4	rep2
U_56	36500	43883	restrictive	A4	rep2
U_61	0	500	restrictive	A4	rep2
U_62	0	500	restrictive	A4	rep2
U_64	13500	14000	restrictive	A4	rep2
U_65	15500	40639	restrictive	A4	rep2
U_66	4500	5000	restrictive	A4	rep2
U_67	36500	37000	restrictive	A4	rep2
U_69	26000	26500	restrictive	A4	rep2
U_70	8000	9500	restrictive	A4	rep2
U_71	15500	26677	restrictive	A4	rep2
U_74	1000	1500	restrictive	A4	rep2
U_74	39500	40500	restrictive	A4	rep2
U_76	39500	41000	restrictive	A4	rep2
U_80	13500	14000	restrictive	A4	rep2
U_83	8500	9000	restrictive	A4	rep2
X	23500	69000	restrictive	A4	rep2
X	727000	727500	restrictive	A4	rep2
X	848000	849500	restrictive	A4	rep2
X	926500	936000	restrictive	A4	rep2
X	2989500	2990000	restrictive	A4	rep2
X	3212500	3229000	restrictive	A4	rep2
X	3224601	3228538	restrictive	A4	rep2
X	3368000	3378500	restrictive	A4	rep2
X	4064500	4070000	restrictive	A4	rep2
X	4501000	4501500	restrictive	A4	rep2
X	5712500	5717000	restrictive	A4	rep2
X	6515000	6515500	restrictive	A4	rep2
X	6571651	6574681	restrictive	A4	rep2
X	8210000	8210500	restrictive	A4	rep2
X	8279803	8284654	restrictive	A4	rep2
X	8280000	8286500	restrictive	A4	rep2
X	8796000	8797000	restrictive	A4	rep2
X	9939000	9939500	restrictive	A4	rep2
X	10595000	10600000	restrictive	A4	rep2
X	10598890	10599681	restrictive	A4	rep2
X	10989244	10991868	restrictive	A4	rep2
X	12437000	12438500	restrictive	A4	rep2
X	12602999	12604930	restrictive	A4	rep2
X	13562309	13563135	restrictive	A4	rep2
X	15611149	15612599	restrictive	A4	rep2
X	16007500	16047000	restrictive	A4	rep2
X	16248848	16253755	restrictive	A4	rep2
X	16249000	16253500	restrictive	A4	rep2
X	18059940	18062301	restrictive	A4	rep2
X	18060000	18061500	restrictive	A4	rep2
X	20977150	20989320	restrictive	A4	rep2
X	21505500	21523000	restrictive	A4	rep2
X	21604000	21811500	restrictive	A4	rep2
X	21826000	21874000	restrictive	A4	rep2
X	21922500	21961500	restrictive	A4	rep2
X	21975500	22007500	restrictive	A4	rep2
X	22236000	22248000	restrictive	A4	rep2
X	22265000	22350000	restrictive	A4	rep2
X	22421000	22513500	restrictive	A4	rep2
X	23583000	23583500	restrictive	A4	rep2
X	23599500	23610500	restrictive	A4	rep2
4	102000	143000	restrictive	A7	rep1
4	533000	540000	restrictive	A7	rep1
4	584722	590476	restrictive	A7	rep1
4	671752	674655	restrictive	A7	rep1
4	801000	849000	restrictive	A7	rep1
4	963000	1026000	restrictive	A7	rep1
4	1312500	1313000	restrictive	A7	rep1
4	1334000	1334500	restrictive	A7	rep1
4	1369500	1383000	restrictive	A7	rep1
4	1411000	1414500	restrictive	A7	rep1
4	1440500	1441000	restrictive	A7	rep1
2L	465000	468500	restrictive	A7	rep1
2L	1681500	1682000	restrictive	A7	rep1
2L	2181500	2182000	restrictive	A7	rep1
2L	2858500	2859000	restrictive	A7	rep1
2L	4948238	4954181	restrictive	A7	rep1
2L	4948500	4949500	restrictive	A7	rep1
2L	4950500	4954000	restrictive	A7	rep1
2L	7494500	7495000	restrictive	A7	rep1
2L	7822242	7824026	restrictive	A7	rep1
2L	8460500	8461000	restrictive	A7	rep1
2L	8470000	8471500	restrictive	A7	rep1
2L	8733714	8750282	restrictive	A7	rep1
2L	8734000	8750000	restrictive	A7	rep1
2L	9719000	9726000	restrictive	A7	rep1
2L	9737500	9746000	restrictive	A7	rep1
2L	9855500	9856500	restrictive	A7	rep1
2L	9874000	9877000	restrictive	A7	rep1
2L	11695000	11697500	restrictive	A7	rep1
2L	12892500	12896500	restrictive	A7	rep1
2L	14797500	14798000	restrictive	A7	rep1
2L	16432500	16433000	restrictive	A7	rep1
2L	17349500	17350000	restrictive	A7	rep1
2L	17888000	17889500	restrictive	A7	rep1
2L	18272500	18275500	restrictive	A7	rep1
2L	18541000	18541500	restrictive	A7	rep1
2L	19383500	19385000	restrictive	A7	rep1
2L	19956500	20023500	restrictive	A7	rep1
2L	20036000	20098500	restrictive	A7	rep1
2L	20038424	20098978	restrictive	A7	rep1
2L	20123500	20124500	restrictive	A7	rep1
2L	21238000	21319500	restrictive	A7	rep1
2L	21467000	21467500	restrictive	A7	rep1
2L	21496000	21496500	restrictive	A7	rep1
2L	21715500	21720000	restrictive	A7	rep1
2L	22326000	22384500	restrictive	A7	rep1
2L	22435000	22495000	restrictive	A7	rep1
2L	22755000	22805000	restrictive	A7	rep1
2L	22981500	22985000	restrictive	A7	rep1
2L	23050000	23051000	restrictive	A7	rep1
2L	23493000	23493500	restrictive	A7	rep1
2L	23503250	23574427	restrictive	A7	rep1
2L	23504500	23574500	restrictive	A7	rep1
2L	23788500	23789000	restrictive	A7	rep1
2R	739500	740500	restrictive	A7	rep1
2R	782500	788500	restrictive	A7	rep1
2R	825000	829500	restrictive	A7	rep1
2R	1333000	1344500	restrictive	A7	rep1
2R	1371500	1372000	restrictive	A7	rep1
2R	1473000	1496000	restrictive	A7	rep1
2R	2014000	2014500	restrictive	A7	rep1
2R	2547000	2547500	restrictive	A7	rep1
2R	2784500	2842000	restrictive	A7	rep1
2R	3830000	3832000	restrictive	A7	rep1
2R	3922500	3923500	restrictive	A7	rep1
2R	4269500	4297500	restrictive	A7	rep1
2R	4861500	4906000	restrictive	A7	rep1
2R	5499000	5499500	restrictive	A7	rep1
2R	5675000	5677500	restrictive	A7	rep1
2R	6439500	6541500	restrictive	A7	rep1
2R	6520511	6545285	restrictive	A7	rep1
2R	6581000	6694500	restrictive	A7	rep1
2R	6808830	6816385	restrictive	A7	rep1
2R	6809000	6833000	restrictive	A7	rep1
2R	6967000	6969000	restrictive	A7	rep1
2R	8623000	8625500	restrictive	A7	rep1
2R	8628000	8630500	restrictive	A7	rep1
2R	8628201	8630739	restrictive	A7	rep1
2R	8632000	8636500	restrictive	A7	rep1
2R	8637500	8642000	restrictive	A7	rep1
2R	8643000	8646000	restrictive	A7	rep1
2R	8643834	8652576	restrictive	A7	rep1
2R	8647500	8653000	restrictive	A7	rep1
2R	9385000	9388000	restrictive	A7	rep1
2R	11468500	11472000	restrictive	A7	rep1
2R	11468736	11478948	restrictive	A7	rep1
2R	11473000	11479000	restrictive	A7	rep1
2R	12880000	12881000	restrictive	A7	rep1
2R	12882000	12884500	restrictive	A7	rep1
2R	13083000	13083500	restrictive	A7	rep1
2R	14458500	14461500	restrictive	A7	rep1
2R	14969500	14974000	restrictive	A7	rep1
2R	14982000	14984000	restrictive	A7	rep1
2R	14986500	14990500	restrictive	A7	rep1
2R	14995000	14997500	restrictive	A7	rep1
2R	15630500	15633500	restrictive	A7	rep1
2R	16658500	16659500	restrictive	A7	rep1
2R	17824500	17825000	restrictive	A7	rep1
2R	18167000	18170500	restrictive	A7	rep1
2R	19536500	19538500	restrictive	A7	rep1
2R	19540500	19541000	restrictive	A7	rep1
2R	19716000	19716500	restrictive	A7	rep1
2R	20665500	20666000	restrictive	A7	rep1
2R	21233000	21235500	restrictive	A7	rep1
2R	21895500	21912000	restrictive	A7	rep1
2R	21895506	21911646	restrictive	A7	rep1
2R	22881772	22888801	restrictive	A7	rep1
2R	22882000	22888500	restrictive	A7	rep1
2R	25273000	25306000	restrictive	A7	rep1
2R	25301552	25302895	restrictive	A7	rep1
3L	95000	107000	restrictive	A7	rep1
3L	162500	176500	restrictive	A7	rep1
3L	3467000	3467500	restrictive	A7	rep1
3L	4130000	4131500	restrictive	A7	rep1
3L	6131500	6135000	restrictive	A7	rep1
3L	6133520	6134628	restrictive	A7	rep1
3L	6137000	6138500	restrictive	A7	rep1
3L	6137368	6147824	restrictive	A7	rep1
3L	6146500	6150500	restrictive	A7	rep1
3L	6157000	6159000	restrictive	A7	rep1
3L	7463000	7469000	restrictive	A7	rep1
3L	8767500	8775000	restrictive	A7	rep1
3L	8864000	8864500	restrictive	A7	rep1
3L	9127500	9135000	restrictive	A7	rep1
3L	9636500	9640500	restrictive	A7	rep1
3L	9727000	9729500	restrictive	A7	rep1
3L	11547500	11548500	restrictive	A7	rep1
3L	11798500	11800500	restrictive	A7	rep1
3L	11807000	11809000	restrictive	A7	rep1
3L	12883000	12887500	restrictive	A7	rep1
3L	13392000	13393000	restrictive	A7	rep1
3L	13985000	13986000	restrictive	A7	rep1
3L	16563000	16565000	restrictive	A7	rep1
3L	16573500	16576500	restrictive	A7	rep1
3L	16582000	16586500	restrictive	A7	rep1
3L	16746000	16746500	restrictive	A7	rep1
3L	17557500	17575500	restrictive	A7	rep1
3L	19173000	19173500	restrictive	A7	rep1
3L	19703500	19705000	restrictive	A7	rep1
3L	21842500	21843000	restrictive	A7	rep1
3L	22391000	22391500	restrictive	A7	rep1
3L	23010000	23031000	restrictive	A7	rep1
3L	23245000	23304500	restrictive	A7	rep1
3L	23803000	23803500	restrictive	A7	rep1
3L	23869000	23870500	restrictive	A7	rep1
3L	24237000	24239000	restrictive	A7	rep1
3L	24546500	24587500	restrictive	A7	rep1
3L	24548682	24851542	restrictive	A7	rep1
3L	24628000	24785000	restrictive	A7	rep1
3L	24806500	24849000	restrictive	A7	rep1
3L	24882500	24883000	restrictive	A7	rep1
3L	24893500	24894500	restrictive	A7	rep1
3L	25020000	25122500	restrictive	A7	rep1
3L	25906500	25943500	restrictive	A7	rep1
3L	25907343	25947304	restrictive	A7	rep1
3L	25973000	25992000	restrictive	A7	rep1
3L	26265000	26265500	restrictive	A7	rep1
3L	26559000	26559500	restrictive	A7	rep1
3L	26623500	26659000	restrictive	A7	rep1
3L	26741500	26829500	restrictive	A7	rep1
3L	26860000	26934500	restrictive	A7	rep1
3L	26867724	26934163	restrictive	A7	rep1
3L	26954000	26957000	restrictive	A7	rep1
3L	26991000	26992000	restrictive	A7	rep1
3L	27011000	27011500	restrictive	A7	rep1
3L	27037500	27038000	restrictive	A7	rep1
3L	27825000	27858000	restrictive	A7	rep1
3L	27902160	27952546	restrictive	A7	rep1
3L	27905000	27951500	restrictive	A7	rep1
3L	27994500	27995000	restrictive	A7	rep1
3R	16500	17000	restrictive	A7	rep1
3R	30000	30500	restrictive	A7	rep1
3R	193000	194500	restrictive	A7	rep1
3R	205000	212500	restrictive	A7	rep1
3R	519000	562500	restrictive	A7	rep1
3R	780500	837500	restrictive	A7	rep1
3R	1022000	1138000	restrictive	A7	rep1
3R	1199500	1246500	restrictive	A7	rep1
3R	1206047	1247843	restrictive	A7	rep1
3R	1322000	1333000	restrictive	A7	rep1
3R	1346500	1347500	restrictive	A7	rep1
3R	1370500	1374000	restrictive	A7	rep1
3R	1502000	1506500	restrictive	A7	rep1
3R	1564000	1646500	restrictive	A7	rep1
3R	1613134	1622696	restrictive	A7	rep1
3R	2119500	2120000	restrictive	A7	rep1
3R	2225000	2225500	restrictive	A7	rep1
3R	2423000	2423500	restrictive	A7	rep1
3R	2616000	2752000	restrictive	A7	rep1
3R	2778500	2876000	restrictive	A7	rep1
3R	2833739	2864579	restrictive	A7	rep1
3R	2892000	2915000	restrictive	A7	rep1
3R	3040500	3152000	restrictive	A7	rep1
3R	3096791	3133437	restrictive	A7	rep1
3R	3329000	3378000	restrictive	A7	rep1
3R	3425000	3487000	restrictive	A7	rep1
3R	3456839	3477158	restrictive	A7	rep1
3R	3781500	3850000	restrictive	A7	rep1
3R	3792094	3837085	restrictive	A7	rep1
3R	3890058	3971332	restrictive	A7	rep1
3R	3921000	4001000	restrictive	A7	rep1
3R	5226500	5241000	restrictive	A7	rep1
3R	6164500	6172500	restrictive	A7	rep1
3R	9077500	9091000	restrictive	A7	rep1
3R	10360500	10361000	restrictive	A7	rep1
3R	11298500	11301000	restrictive	A7	rep1
3R	11383500	11388500	restrictive	A7	rep1
3R	11389500	11390500	restrictive	A7	rep1
3R	11414500	11417000	restrictive	A7	rep1
3R	11419500	11421500	restrictive	A7	rep1
3R	11645500	11646000	restrictive	A7	rep1
[truncated: 2,837 more rows]

## Sheet: proTRAC
2R	6168587	6448040	proTRAC	A1	rep1
2R	4392735	4393260	proTRAC	A1	rep1
2R	24019378	24024136	proTRAC	A1	rep1
2R	25157211	25169888	proTRAC	A1	rep1
2R	24890676	24907473	proTRAC	A1	rep1
2R	24807243	24809546	proTRAC	A1	rep1
2R	24825857	24826947	proTRAC	A1	rep1
2L	20216357	20274108	proTRAC	A1	rep1
2L	21599318	21603651	proTRAC	A1	rep1
2L	22815014	22817378	proTRAC	A1	rep1
2L	8355170	8355878	proTRAC	A1	rep1
2L	7817834	7819652	proTRAC	A1	rep1
2L	4954178	4959612	proTRAC	A1	rep1
X	10673266	10693908	proTRAC	A1	rep1
X	3196693	3199823	proTRAC	A1	rep1
X	1229954	1230726	proTRAC	A1	rep1
4	71440	72521	proTRAC	A1	rep1
4	1298365	1306327	proTRAC	A1	rep1
3R	31695803	31699482	proTRAC	A1	rep1
3R	32058342	32074616	proTRAC	A1	rep1
3R	32208761	32210273	proTRAC	A1	rep1
3L	24530973	24576664	proTRAC	A1	rep1
3L	27889719	27897064	proTRAC	A1	rep1
3L	3144840	3155523	proTRAC	A1	rep1
3L	9425947	9428128	proTRAC	A1	rep1
X	3196632	3199914	proTRAC	A1	rep1
2L	969768	977348	proTRAC	A1	rep1
2L	989612	998652	proTRAC	A1	rep1
2L	1213018	1220413	proTRAC	A1	rep1
2L	1276983	1282003	proTRAC	A1	rep1
2L	1396107	1400803	proTRAC	A1	rep1
2L	1556042	1560738	proTRAC	A1	rep1
2L	1577612	1580409	proTRAC	A1	rep1
2L	1685901	1693311	proTRAC	A1	rep1
2L	2106046	2113652	proTRAC	A1	rep1
2L	2566733	2573469	proTRAC	A1	rep1
2L	3073687	3083064	proTRAC	A1	rep1
2L	3200638	3208016	proTRAC	A1	rep1
2L	4002904	4011665	proTRAC	A1	rep1
2L	4484918	4489196	proTRAC	A1	rep1
2L	4865600	4874756	proTRAC	A1	rep1
2L	4896166	4901485	proTRAC	A1	rep1
2L	5220125	5226427	proTRAC	A1	rep1
2L	5577280	5581877	proTRAC	A1	rep1
2L	5723108	5737296	proTRAC	A1	rep1
2L	6086643	6090251	proTRAC	A1	rep1
2L	6315810	6320775	proTRAC	A1	rep1
2L	6471426	6476748	proTRAC	A1	rep1
2L	6571807	6587661	proTRAC	A1	rep1
2L	7898255	7901617	proTRAC	A1	rep1
2L	7935901	7944716	proTRAC	A1	rep1
2L	8557752	8562784	proTRAC	A1	rep1
2L	8947294	8951473	proTRAC	A1	rep1
2L	9108857	9113550	proTRAC	A1	rep1
2L	9149111	9154482	proTRAC	A1	rep1
2L	9364807	9387346	proTRAC	A1	rep1
2L	9602075	9610471	proTRAC	A1	rep1
2L	9697920	9705849	proTRAC	A1	rep1
2L	9743924	9751930	proTRAC	A1	rep1
2L	10082490	10089904	proTRAC	A1	rep1
2L	10146941	10152224	proTRAC	A1	rep1
2L	10502091	10529304	proTRAC	A1	rep1
2L	10598712	10607474	proTRAC	A1	rep1
2L	10644577	10649470	proTRAC	A1	rep1
2L	10953082	10960494	proTRAC	A1	rep1
2L	11091961	11099567	proTRAC	A1	rep1
2L	11173148	11182225	proTRAC	A1	rep1
2L	11353901	11362994	proTRAC	A1	rep1
2L	11462309	11469708	proTRAC	A1	rep1
2L	12175889	12183426	proTRAC	A1	rep1
2L	12384285	12389414	proTRAC	A1	rep1
2L	12451006	12456045	proTRAC	A1	rep1
2L	12859605	12872683	proTRAC	A1	rep1
2L	12900266	12905658	proTRAC	A1	rep1
2L	12936197	12946923	proTRAC	A1	rep1
2L	13058902	13065061	proTRAC	A1	rep1
2L	13143094	13158293	proTRAC	A1	rep1
2L	13191826	13200880	proTRAC	A1	rep1
2L	13597945	13603282	proTRAC	A1	rep1
2L	13667043	13675585	proTRAC	A1	rep1
2L	13808071	13818181	proTRAC	A1	rep1
2L	14006071	14013904	proTRAC	A1	rep1
2L	14122931	14130444	proTRAC	A1	rep1
2L	14846785	14854629	proTRAC	A1	rep1
2L	14873172	14887504	proTRAC	A1	rep1
2L	14943761	14959442	proTRAC	A1	rep1
2L	15032875	15040450	proTRAC	A1	rep1
2L	15058331	15065787	proTRAC	A1	rep1
2L	15257350	15265233	proTRAC	A1	rep1
2L	15324140	15329785	proTRAC	A1	rep1
2L	15484406	15489094	proTRAC	A1	rep1
2L	16045983	16050676	proTRAC	A1	rep1
2L	16165240	16169931	proTRAC	A1	rep1
2L	16239770	16255887	proTRAC	A1	rep1
2L	16599082	16617828	proTRAC	A1	rep1
2L	16628516	16646545	proTRAC	A1	rep1
2L	17104943	17114063	proTRAC	A1	rep1
2L	17181903	17186597	proTRAC	A1	rep1
2L	17346580	17349789	proTRAC	A1	rep1
2L	17410024	17414160	proTRAC	A1	rep1
2L	17627530	17631692	proTRAC	A1	rep1
2L	17701843	17706210	proTRAC	A1	rep1
2L	17997621	18003393	proTRAC	A1	rep1
2L	18285832	18304745	proTRAC	A1	rep1
2L	18448074	18452770	proTRAC	A1	rep1
2L	18528639	18532475	proTRAC	A1	rep1
2L	18571563	18576585	proTRAC	A1	rep1
2L	18676437	18690683	proTRAC	A1	rep1
2L	18855246	18858216	proTRAC	A1	rep1
2L	19045149	19051383	proTRAC	A1	rep1
2L	19841652	19846642	proTRAC	A1	rep1
2L	20173143	20191002	proTRAC	A1	rep1
2L	20253318	20266636	proTRAC	A1	rep1
2L	20406706	20411398	proTRAC	A1	rep1
2L	20652334	20657641	proTRAC	A1	rep1
2L	20816715	20821412	proTRAC	A1	rep1
2L	20837088	20844700	proTRAC	A1	rep1
2L	20850660	20857026	proTRAC	A1	rep1
2L	21272314	21275667	proTRAC	A1	rep1
2L	21397887	21411669	proTRAC	A1	rep1
2L	21524277	21528036	proTRAC	A1	rep1
2L	21583659	21588561	proTRAC	A1	rep1
2L	21864045	21868727	proTRAC	A1	rep1
2L	21896278	21903738	proTRAC	A1	rep1
2L	21927070	21934893	proTRAC	A1	rep1
2L	22185131	22220771	proTRAC	A1	rep1
2L	22238038	22241942	proTRAC	A1	rep1
2L	22648814	22653964	proTRAC	A1	rep1
2L	22672336	22682636	proTRAC	A1	rep1
2L	22900685	22906991	proTRAC	A1	rep1
2L	22912020	22920688	proTRAC	A1	rep1
2L	23327830	23418295	proTRAC	A1	rep1
2R	2	61115	proTRAC	A1	rep1
2R	121036	124862	proTRAC	A1	rep1
2R	212922	225118	proTRAC	A1	rep1
2R	239676	260921	proTRAC	A1	rep1
2R	272016	300090	proTRAC	A1	rep1
2R	311008	316118	proTRAC	A1	rep1
2R	346380	392850	proTRAC	A1	rep1
2R	474206	505889	proTRAC	A1	rep1
2R	523084	549568	proTRAC	A1	rep1
2R	560002	613447	proTRAC	A1	rep1
2R	685540	695283	proTRAC	A1	rep1
2R	759403	772124	proTRAC	A1	rep1
2R	857656	862363	proTRAC	A1	rep1
2R	906420	917090	proTRAC	A1	rep1
2R	1028205	1048321	proTRAC	A1	rep1
2R	1061867	1065633	proTRAC	A1	rep1
2R	1086514	1095244	proTRAC	A1	rep1
2R	1104082	1127744	proTRAC	A1	rep1
2R	1212251	1221136	proTRAC	A1	rep1
2R	1229141	1243055	proTRAC	A1	rep1
2R	1262015	1270672	proTRAC	A1	rep1
2R	1470559	1473500	proTRAC	A1	rep1
2R	1489263	1518516	proTRAC	A1	rep1
2R	1557478	1591491	proTRAC	A1	rep1
2R	1644848	1693854	proTRAC	A1	rep1
2R	1713357	1748374	proTRAC	A1	rep1
2R	1829947	1837624	proTRAC	A1	rep1
2R	1936050	1947304	proTRAC	A1	rep1
2R	1968767	1989888	proTRAC	A1	rep1
2R	2001853	2051308	proTRAC	A1	rep1
2R	2106848	2118650	proTRAC	A1	rep1
2R	2126108	2230070	proTRAC	A1	rep1
2R	2235565	2285893	proTRAC	A1	rep1
2R	2356870	2365311	proTRAC	A1	rep1
2R	2452483	2456637	proTRAC	A1	rep1
2R	2494243	2527677	proTRAC	A1	rep1
2R	2640359	2671895	proTRAC	A1	rep1
2R	2708890	2725156	proTRAC	A1	rep1
2R	2733019	2773255	proTRAC	A1	rep1
2R	2821621	2849387	proTRAC	A1	rep1
2R	2873639	2877951	proTRAC	A1	rep1
2R	2945922	2955502	proTRAC	A1	rep1
2R	2970489	3003525	proTRAC	A1	rep1
2R	3020960	3028497	proTRAC	A1	rep1
2R	3077733	3089034	proTRAC	A1	rep1
2R	3098413	3106523	proTRAC	A1	rep1
2R	3168608	3185262	proTRAC	A1	rep1
2R	3260353	3264086	proTRAC	A1	rep1
2R	3372881	3376614	proTRAC	A1	rep1
2R	3389631	3409697	proTRAC	A1	rep1
2R	3415049	3432917	proTRAC	A1	rep1
2R	3503069	3519712	proTRAC	A1	rep1
2R	3555609	3559766	proTRAC	A1	rep1
2R	3838603	3854104	proTRAC	A1	rep1
2R	3865219	3877293	proTRAC	A1	rep1
2R	3915144	3919987	proTRAC	A1	rep1
2R	3926375	3935022	proTRAC	A1	rep1
2R	3946834	3955621	proTRAC	A1	rep1
2R	3967836	4010653	proTRAC	A1	rep1
2R	4223031	4230509	proTRAC	A1	rep1
2R	4274694	4308277	proTRAC	A1	rep1
2R	4313554	4333700	proTRAC	A1	rep1
2R	4353802	4362890	proTRAC	A1	rep1
2R	4380586	4384604	proTRAC	A1	rep1
2R	4441443	4447374	proTRAC	A1	rep1
2R	4453291	4465484	proTRAC	A1	rep1
2R	4513148	4525273	proTRAC	A1	rep1
2R	4531178	4553390	proTRAC	A1	rep1
2R	4560820	4571313	proTRAC	A1	rep1
2R	4594036	4598267	proTRAC	A1	rep1
2R	4664455	4670677	proTRAC	A1	rep1
2R	4786937	4791630	proTRAC	A1	rep1
2R	4824926	4836115	proTRAC	A1	rep1
2R	4852430	4905617	proTRAC	A1	rep1
2R	4919868	4927488	proTRAC	A1	rep1
2R	4951309	4963198	proTRAC	A1	rep1
2R	4970329	4980772	proTRAC	A1	rep1
2R	4997728	5019892	proTRAC	A1	rep1
2R	5110542	5115049	proTRAC	A1	rep1
2R	5126832	5142209	proTRAC	A1	rep1
2R	5251163	5259857	proTRAC	A1	rep1
2R	5294603	5331469	proTRAC	A1	rep1
2R	5343858	5356894	proTRAC	A1	rep1
2R	5481680	5517910	proTRAC	A1	rep1
2R	5527401	5536739	proTRAC	A1	rep1
2R	5902874	5908057	proTRAC	A1	rep1
2R	5924551	5927388	proTRAC	A1	rep1
2R	6477773	6482438	proTRAC	A1	rep1
2R	6753835	6761722	proTRAC	A1	rep1
2R	7536654	7538820	proTRAC	A1	rep1
2R	8078882	8083513	proTRAC	A1	rep1
2R	8113993	8119245	proTRAC	A1	rep1
2R	8192519	8201279	proTRAC	A1	rep1
2R	8466934	8478066	proTRAC	A1	rep1
2R	8856321	8859129	proTRAC	A1	rep1
2R	9194221	9203754	proTRAC	A1	rep1
2R	9777382	9783900	proTRAC	A1	rep1
2R	10245813	10256723	proTRAC	A1	rep1
2R	10295488	10303100	proTRAC	A1	rep1
2R	10441139	10447493	proTRAC	A1	rep1
2R	10505314	10511406	proTRAC	A1	rep1
2R	10555110	10570200	proTRAC	A1	rep1
2R	10673256	10680906	proTRAC	A1	rep1
2R	10779563	10788659	proTRAC	A1	rep1
2R	10886316	10895769	proTRAC	A1	rep1
2R	10921905	10929567	proTRAC	A1	rep1
2R	11591091	11595785	proTRAC	A1	rep1
2R	12019701	12027191	proTRAC	A1	rep1
2R	12064413	12075562	proTRAC	A1	rep1
2R	12276981	12282759	proTRAC	A1	rep1
2R	12622716	12626433	proTRAC	A1	rep1
2R	12743449	12749844	proTRAC	A1	rep1
2R	14125093	14129789	proTRAC	A1	rep1
2R	14343360	14352497	proTRAC	A1	rep1
2R	14594566	14601998	proTRAC	A1	rep1
2R	14634556	14639241	proTRAC	A1	rep1
2R	14823733	14833062	proTRAC	A1	rep1
2R	15208199	15212736	proTRAC	A1	rep1
2R	15399876	15409170	proTRAC	A1	rep1
2R	16364441	16381326	proTRAC	A1	rep1
2R	16536444	16539914	proTRAC	A1	rep1
2R	17605108	17609792	proTRAC	A1	rep1
2R	17957218	17959342	proTRAC	A1	rep1
2R	18276322	18282665	proTRAC	A1	rep1
2R	18290076	18299183	proTRAC	A1	rep1
2R	18610681	18628441	proTRAC	A1	rep1
2R	18937463	18942147	proTRAC	A1	rep1
2R	18991273	19000362	proTRAC	A1	rep1
2R	19086873	19093851	proTRAC	A1	rep1
2R	19168744	19176487	proTRAC	A1	rep1
2R	19964427	19969668	proTRAC	A1	rep1
2R	20015963	20023417	proTRAC	A1	rep1
2R	20246664	20255060	proTRAC	A1	rep1
2R	20463040	20470668	proTRAC	A1	rep1
2R	21505550	21539856	proTRAC	A1	rep1
2R	21551795	21559186	proTRAC	A1	rep1
2R	21704242	21711657	proTRAC	A1	rep1
2R	21835037	21848778	proTRAC	A1	rep1
2R	21975855	21981680	proTRAC	A1	rep1
2R	22702476	22711574	proTRAC	A1	rep1
2R	22933723	22938453	proTRAC	A1	rep1
2R	23407437	23416507	proTRAC	A1	rep1
2R	24897403	24907178	proTRAC	A1	rep1
3L	294620	309907	proTRAC	A1	rep1
3L	860203	872046	proTRAC	A1	rep1
3L	1273244	1277928	proTRAC	A1	rep1
3L	1376124	1383629	proTRAC	A1	rep1
3L	1882799	1891894	proTRAC	A1	rep1
3L	1912298	1920506	proTRAC	A1	rep1
3L	2196624	2208034	proTRAC	A1	rep1
3L	2708042	2712303	proTRAC	A1	rep1
3L	2871595	2878475	proTRAC	A1	rep1
3L	2924215	2944615	proTRAC	A1	rep1
3L	3303566	3308250	proTRAC	A1	rep1
3L	3699067	3707088	proTRAC	A1	rep1
3L	4312378	4320322	proTRAC	A1	rep1
3L	5066009	5073529	proTRAC	A1	rep1
3L	5258404	5265781	proTRAC	A1	rep1
3L	5452825	5457754	proTRAC	A1	rep1
3L	6083139	6087823	proTRAC	A1	rep1
3L	7214609	7220792	proTRAC	A1	rep1
3L	7324666	7343146	proTRAC	A1	rep1
3L	7590575	7598704	proTRAC	A1	rep1
3L	7859203	7869473	proTRAC	A1	rep1
3L	7875365	7895298	proTRAC	A1	rep1
3L	7986879	8002043	proTRAC	A1	rep1
3L	8224157	8231667	proTRAC	A1	rep1
3L	8317041	8329867	proTRAC	A1	rep1
3L	9938397	9945799	proTRAC	A1	rep1
3L	9981782	9994253	proTRAC	A1	rep1
3L	10313103	10322104	proTRAC	A1	rep1
3L	10929605	10937017	proTRAC	A1	rep1
3L	11100230	11104914	proTRAC	A1	rep1
3L	11121230	11129023	proTRAC	A1	rep1
3L	11372613	11377537	proTRAC	A1	rep1
3L	11453843	11463573	proTRAC	A1	rep1
3L	11816279	11831791	proTRAC	A1	rep1
3L	11843484	11848007	proTRAC	A1	rep1
3L	12594701	12602110	proTRAC	A1	rep1
3L	13105527	13120034	proTRAC	A1	rep1
3L	13346986	13355370	proTRAC	A1	rep1
3L	13640422	13642535	proTRAC	A1	rep1
3L	13670144	13677254	proTRAC	A1	rep1
3L	13746008	13755103	proTRAC	A1	rep1
3L	13972751	13978682	proTRAC	A1	rep1
3L	14054827	14060906	proTRAC	A1	rep1
3L	14206442	14211344	proTRAC	A1	rep1
3L	14233343	14240890	proTRAC	A1	rep1
3L	14312485	14317178	proTRAC	A1	rep1
3L	14765192	14774571	proTRAC	A1	rep1
3L	15927617	15932303	proTRAC	A1	rep1
3L	16261635	16267107	proTRAC	A1	rep1
3L	16506614	16515723	proTRAC	A1	rep1
3L	16786823	16794762	proTRAC	A1	rep1
3L	17014309	17019005	proTRAC	A1	rep1
3L	17121933	17133943	proTRAC	A1	rep1
3L	17624705	17635804	proTRAC	A1	rep1
3L	17701284	17705967	proTRAC	A1	rep1
3L	17730916	17738192	proTRAC	A1	rep1
3L	17751059	17761758	proTRAC	A1	rep1
3L	17893911	17903577	proTRAC	A1	rep1
3L	18038703	18049937	proTRAC	A1	rep1
3L	18317946	18322639	proTRAC	A1	rep1
3L	18516584	18522101	proTRAC	A1	rep1
3L	18634271	18642207	proTRAC	A1	rep1
3L	19104790	19108335	proTRAC	A1	rep1
3L	19234885	19250401	proTRAC	A1	rep1
3L	19263847	19280618	proTRAC	A1	rep1
3L	19382046	19387167	proTRAC	A1	rep1
3L	19697934	19702631	proTRAC	A1	rep1
3L	19741803	19762664	proTRAC	A1	rep1
3L	19767909	19776016	proTRAC	A1	rep1
3L	19846729	19854553	proTRAC	A1	rep1
3L	19881882	19891050	proTRAC	A1	rep1
3L	20176601	20200712	proTRAC	A1	rep1
3L	20331816	20350076	proTRAC	A1	rep1
3L	20434205	20440064	proTRAC	A1	rep1
3L	20725350	20741770	proTRAC	A1	rep1
3L	20940402	20952202	proTRAC	A1	rep1
3L	21977672	21982368	proTRAC	A1	rep1
3L	22112013	22121025	proTRAC	A1	rep1
3L	22718426	22722402	proTRAC	A1	rep1
3L	23022532	23029932	proTRAC	A1	rep1
3L	23061136	23070157	proTRAC	A1	rep1
3L	23205012	23211895	proTRAC	A1	rep1
3L	23223360	23275023	proTRAC	A1	rep1
3L	23509616	23521797	proTRAC	A1	rep1
3L	23541733	23553908	proTRAC	A1	rep1
3L	23563437	23568401	proTRAC	A1	rep1
3L	23606033	23628503	proTRAC	A1	rep1
3L	23652149	23656628	proTRAC	A1	rep1
3L	23696314	23722497	proTRAC	A1	rep1
3L	23741444	23750620	proTRAC	A1	rep1
3L	23783761	23811049	proTRAC	A1	rep1
3L	23859010	23900643	proTRAC	A1	rep1
3L	23911709	23927351	proTRAC	A1	rep1
3L	23945835	23953464	proTRAC	A1	rep1
3L	23959951	23964765	proTRAC	A1	rep1
3L	24205242	24223892	proTRAC	A1	rep1
3L	24271096	24290971	proTRAC	A1	rep1
3L	24313035	24327846	proTRAC	A1	rep1
3L	25104978	25130405	proTRAC	A1	rep1
3L	25337559	25382118	proTRAC	A1	rep1
3L	25632443	25666693	proTRAC	A1	rep1
3L	25672227	25687263	proTRAC	A1	rep1
3L	25717436	25768190	proTRAC	A1	rep1
3L	25786671	25809297	proTRAC	A1	rep1
3L	25874996	25891303	proTRAC	A1	rep1
3L	25908392	25920649	proTRAC	A1	rep1
3L	25945905	25965593	proTRAC	A1	rep1
3L	25970851	25975325	proTRAC	A1	rep1
3L	26015009	26025509	proTRAC	A1	rep1
3L	26030939	26043028	proTRAC	A1	rep1
3L	26088873	26154483	proTRAC	A1	rep1
3L	26211703	26231700	proTRAC	A1	rep1
3L	26246437	26326064	proTRAC	A1	rep1
3L	26334069	26339309	proTRAC	A1	rep1
3L	26477142	26487471	proTRAC	A1	rep1
3L	26534723	26549673	proTRAC	A1	rep1
3L	26563021	26582711	proTRAC	A1	rep1
3L	26594264	26650577	proTRAC	A1	rep1
3L	27037711	27055256	proTRAC	A1	rep1
3L	27120221	27176664	proTRAC	A1	rep1
3L	27225035	27261628	proTRAC	A1	rep1
3L	27274210	27287190	proTRAC	A1	rep1
3L	27336498	27351368	proTRAC	A1	rep1
3L	27362627	27365781	proTRAC	A1	rep1
3L	27419239	27433163	proTRAC	A1	rep1
3L	27446250	27457811	proTRAC	A1	rep1
3L	27498081	27504506	proTRAC	A1	rep1
3L	27532123	27581915	proTRAC	A1	rep1
3L	27616625	27624529	proTRAC	A1	rep1
3L	27630124	27653296	proTRAC	A1	rep1
3L	27907611	27913178	proTRAC	A1	rep1
3L	28020400	28063324	proTRAC	A1	rep1
3R	139808	143100	proTRAC	A1	rep1
3R	197383	204303	proTRAC	A1	rep1
3R	223861	228005	proTRAC	A1	rep1
3R	247179	266248	proTRAC	A1	rep1
3R	298681	309986	proTRAC	A1	rep1
3R	322516	333087	proTRAC	A1	rep1
3R	375319	388117	proTRAC	A1	rep1
3R	394725	421568	proTRAC	A1	rep1
3R	429865	485037	proTRAC	A1	rep1
3R	644688	688787	proTRAC	A1	rep1
3R	760406	779698	proTRAC	A1	rep1
3R	862240	891331	proTRAC	A1	rep1
3R	1147286	1174504	proTRAC	A1	rep1
3R	1260008	1282577	proTRAC	A1	rep1
3R	1304743	1330313	proTRAC	A1	rep1
3R	1432450	1437102	proTRAC	A1	rep1
3R	1505088	1523000	proTRAC	A1	rep1
3R	1937022	1961848	proTRAC	A1	rep1
3R	2082365	2087192	proTRAC	A1	rep1
3R	2130472	2136072	proTRAC	A1	rep1
3R	2142486	2205039	proTRAC	A1	rep1
3R	2352215	2379446	proTRAC	A1	rep1
3R	2487024	2495840	proTRAC	A1	rep1
3R	2506409	2515316	proTRAC	A1	rep1
3R	2605565	2654106	proTRAC	A1	rep1
3R	2701831	2706109	proTRAC	A1	rep1
3R	2713021	2726862	proTRAC	A1	rep1
3R	2733200	2749570	proTRAC	A1	rep1
3R	2832650	2850635	proTRAC	A1	rep1
3R	2863033	2872019	proTRAC	A1	rep1
3R	2957676	2967686	proTRAC	A1	rep1
3R	3107707	3117499	proTRAC	A1	rep1
3R	3348084	3367476	proTRAC	A1	rep1
3R	3395367	3403523	proTRAC	A1	rep1
3R	3463730	3488261	proTRAC	A1	rep1
3R	3520200	3535525	proTRAC	A1	rep1
3R	3653978	3668616	proTRAC	A1	rep1
3R	3742880	3757898	proTRAC	A1	rep1
3R	3790078	3797666	proTRAC	A1	rep1
3R	3864039	3882650	proTRAC	A1	rep1
3R	3918692	3927466	proTRAC	A1	rep1
3R	4179946	4220291	proTRAC	A1	rep1
3R	4369554	4375876	proTRAC	A1	rep1
3R	4700631	4707229	proTRAC	A1	rep1
3R	4741020	4755076	proTRAC	A1	rep1
3R	4794026	4801528	proTRAC	A1	rep1
3R	5101381	5106824	proTRAC	A1	rep1
3R	5170991	5179524	proTRAC	A1	rep1
3R	5836319	5845562	proTRAC	A1	rep1
3R	5896691	5899503	proTRAC	A1	rep1
3R	6052338	6074343	proTRAC	A1	rep1
3R	6098325	6113018	proTRAC	A1	rep1
3R	6629737	6641084	proTRAC	A1	rep1
3R	6810500	6818231	proTRAC	A1	rep1
3R	7135414	7140098	proTRAC	A1	rep1
3R	7544995	7551173	proTRAC	A1	rep1
3R	7651475	7656169	proTRAC	A1	rep1
3R	7786125	7811270	proTRAC	A1	rep1
3R	7986498	7993909	proTRAC	A1	rep1
3R	8012779	8017483	proTRAC	A1	rep1
3R	8313954	8322731	proTRAC	A1	rep1
3R	8392600	8396773	proTRAC	A1	rep1
3R	8615832	8620483	proTRAC	A1	rep1
3R	8684431	8689127	proTRAC	A1	rep1
3R	9030427	9038097	proTRAC	A1	rep1
3R	9063716	9081249	proTRAC	A1	rep1
3R	9115424	9118256	proTRAC	A1	rep1
3R	9357386	9360931	proTRAC	A1	rep1
3R	9450271	9456097	proTRAC	A1	rep1
3R	9476000	9491538	proTRAC	A1	rep1
3R	9990260	9999379	proTRAC	A1	rep1
3R	10010767	10019858	proTRAC	A1	rep1
3R	10394936	10402676	proTRAC	A1	rep1
3R	10556520	10567710	proTRAC	A1	rep1
3R	10709619	10717035	proTRAC	A1	rep1
3R	10964123	10976132	proTRAC	A1	rep1
3R	11146753	11163312	proTRAC	A1	rep1
3R	11193742	11201114	proTRAC	A1	rep1
3R	11251702	11259077	proTRAC	A1	rep1
3R	11359144	11366640	proTRAC	A1	rep1
3R	11389918	11401888	proTRAC	A1	rep1
3R	11435394	11444671	proTRAC	A1	rep1
3R	11533022	11537716	proTRAC	A1	rep1
3R	12140820	12149287	proTRAC	A1	rep1
3R	12183106	12188997	proTRAC	A1	rep1
3R	12275622	12300309	proTRAC	A1	rep1
3R	12821596	12827237	proTRAC	A1	rep1
3R	13005130	13015301	proTRAC	A1	rep1
3R	13204852	13211857	proTRAC	A1	rep1
3R	13534535	13539573	proTRAC	A1	rep1
3R	13568515	13572917	proTRAC	A1	rep1
3R	13626789	13635929	proTRAC	A1	rep1
3R	13896516	13904599	proTRAC	A1	rep1
3R	13987644	13998233	proTRAC	A1	rep1
3R	14554403	14563376	proTRAC	A1	rep1
3R	14719156	14728298	proTRAC	A1	rep1
3R	15395669	15400353	proTRAC	A1	rep1
3R	15489329	15496042	proTRAC	A1	rep1
3R	16127278	16137865	proTRAC	A1	rep1
3R	16255214	16262835	proTRAC	A1	rep1
3R	17377162	17384272	proTRAC	A1	rep1
3R	17758157	17767266	proTRAC	A1	rep1
3R	17884044	17896272	proTRAC	A1	rep1
3R	17942948	17956469	proTRAC	A1	rep1
3R	18330627	18334171	proTRAC	A1	rep1
3R	18389720	18397232	proTRAC	A1	rep1
3R	18467537	18472222	proTRAC	A1	rep1
3R	18506984	18514486	proTRAC	A1	rep1
3R	19172370	19181507	proTRAC	A1	rep1
3R	19243768	19252919	proTRAC	A1	rep1
3R	19450645	19455347	proTRAC	A1	rep1
3R	19578390	19594202	proTRAC	A1	rep1
3R	19930805	19941787	proTRAC	A1	rep1
3R	20184993	20190164	proTRAC	A1	rep1
3R	20308182	20330005	proTRAC	A1	rep1
3R	20407445	20412542	proTRAC	A1	rep1
3R	20670596	20674726	proTRAC	A1	rep1
3R	20812855	20817551	proTRAC	A1	rep1
3R	20944415	20962580	proTRAC	A1	rep1
3R	21137756	21146850	proTRAC	A1	rep1
3R	21187872	21192242	proTRAC	A1	rep1
3R	21309142	21316225	proTRAC	A1	rep1
3R	21330669	21338265	proTRAC	A1	rep1
3R	21396288	21403808	proTRAC	A1	rep1
3R	22088979	22092104	proTRAC	A1	rep1
3R	22378402	22385806	proTRAC	A1	rep1
3R	22475709	22483520	proTRAC	A1	rep1
3R	22582363	22586505	proTRAC	A1	rep1
3R	22989958	22999735	proTRAC	A1	rep1
3R	23258589	23266827	proTRAC	A1	rep1
3R	23504589	23509273	proTRAC	A1	rep1
3R	23666437	23671461	proTRAC	A1	rep1
3R	23968274	23972452	proTRAC	A1	rep1
3R	24682616	24691728	proTRAC	A1	rep1
3R	24724212	24729238	proTRAC	A1	rep1
3R	24921170	24925866	proTRAC	A1	rep1
3R	25478408	25481843	proTRAC	A1	rep1
3R	25845625	25850439	proTRAC	A1	rep1
3R	27275524	27294406	proTRAC	A1	rep1
3R	27527793	27536896	proTRAC	A1	rep1
3R	27978761	27981822	proTRAC	A1	rep1
3R	28919196	28927867	proTRAC	A1	rep1
3R	29160583	29168613	proTRAC	A1	rep1
3R	29216711	29230241	proTRAC	A1	rep1
3R	30282264	30297497	proTRAC	A1	rep1
3R	30786194	30794349	proTRAC	A1	rep1
3R	30845021	30856028	proTRAC	A1	rep1
3R	30865700	30873914	proTRAC	A1	rep1
3R	31149007	31156421	proTRAC	A1	rep1
3R	31671698	31675986	proTRAC	A1	rep1
3R	32110101	32114582	proTRAC	A1	rep1
4	34	23495	proTRAC	A1	rep1
4	37914	54307	proTRAC	A1	rep1
4	136046	148006	proTRAC	A1	rep1
4	182309	186695	proTRAC	A1	rep1
4	195867	205206	proTRAC	A1	rep1
4	312685	320013	proTRAC	A1	rep1
4	326497	330702	proTRAC	A1	rep1
4	340582	346831	proTRAC	A1	rep1
4	508300	546119	proTRAC	A1	rep1
4	589446	599420	proTRAC	A1	rep1
4	677032	688270	proTRAC	A1	rep1
4	730913	746854	proTRAC	A1	rep1
4	799005	807723	proTRAC	A1	rep1
4	1038740	1048859	proTRAC	A1	rep1
4	1071927	1076918	proTRAC	A1	rep1
4	1262884	1265879	proTRAC	A1	rep1
U_0	7529	29921	proTRAC	A1	rep1
U_1	14787	28839	proTRAC	A1	rep1
U_10	10400	21525	proTRAC	A1	rep1
U_10	42202	85722	proTRAC	A1	rep1
U_12	6205	10900	proTRAC	A1	rep1
U_19	16567	30316	proTRAC	A1	rep1
U_20	16208	28053	proTRAC	A1	rep1
U_22	14473	17915	proTRAC	A1	rep1
U_23	6163	20692	proTRAC	A1	rep1
U_24	5209	7666	proTRAC	A1	rep1
U_24	19800	25313	proTRAC	A1	rep1
U_24	41201	52325	proTRAC	A1	rep1
U_24	68801	83510	proTRAC	A1	rep1
U_25	14802	17324	proTRAC	A1	rep1
U_25	69402	80513	proTRAC	A1	rep1
U_26	7201	18303	proTRAC	A1	rep1
U_27	2	43737	proTRAC	A1	rep1
U_28	11028	19230	proTRAC	A1	rep1
U_3	11872	25622	proTRAC	A1	rep1
U_30	8432	10687	proTRAC	A1	rep1
U_31	3936	8598	proTRAC	A1	rep1
U_33	22317	27003	proTRAC	A1	rep1
U_34	12098	16782	proTRAC	A1	rep1
U_36	443	10582	proTRAC	A1	rep1
U_37	6287	19434	proTRAC	A1	rep1
U_4	5559	13061	proTRAC	A1	rep1
U_44	9774	21597	proTRAC	A1	rep1
U_45	12	19665	proTRAC	A1	rep1
U_46	10220	15597	proTRAC	A1	rep1
U_53	18201	61523	proTRAC	A1	rep1
U_53	82209	93327	proTRAC	A1	rep1
U_53	112401	116124	proTRAC	A1	rep1
U_55	35130	41937	proTRAC	A1	rep1
U_55	51889	56855	proTRAC	A1	rep1
U_59	456	5049	proTRAC	A1	rep1
U_63	13257	22322	proTRAC	A1	rep1
U_68	11031	14675	proTRAC	A1	rep1
U_69	30506	35419	proTRAC	A1	rep1
U_7	1437	44392	proTRAC	A1	rep1
U_8	14774	19636	proTRAC	A1	rep1
X	208649	216904	proTRAC	A1	rep1
X	430765	435650	proTRAC	A1	rep1
X	730928	738451	proTRAC	A1	rep1
X	871953	877834	proTRAC	A1	rep1
X	899732	909126	proTRAC	A1	rep1
X	1260295	1267932	proTRAC	A1	rep1
X	1352808	1363710	proTRAC	A1	rep1
X	2709287	2717941	proTRAC	A1	rep1
X	2972731	2977929	proTRAC	A1	rep1
X	3004470	3011991	proTRAC	A1	rep1
X	3022873	3027901	proTRAC	A1	rep1
X	3103776	3111438	proTRAC	A1	rep1
X	3985999	3993400	proTRAC	A1	rep1
X	4031527	4044371	proTRAC	A1	rep1
X	4724455	4732495	proTRAC	A1	rep1
X	4793143	4800847	proTRAC	A1	rep1
X	4850445	4868260	proTRAC	A1	rep1
X	4925963	4930646	proTRAC	A1	rep1
X	5042028	5047085	proTRAC	A1	rep1
X	5082465	5090995	proTRAC	A1	rep1
X	5209577	5214345	proTRAC	A1	rep1
X	5582609	5590891	proTRAC	A1	rep1
X	6131795	6139860	proTRAC	A1	rep1
X	6246413	6260430	proTRAC	A1	rep1
X	6270060	6275770	proTRAC	A1	rep1
X	6283335	6290899	proTRAC	A1	rep1
X	6800489	6805187	proTRAC	A1	rep1
X	6866973	6871669	proTRAC	A1	rep1
X	6907559	6916618	proTRAC	A1	rep1
X	7113150	7143760	proTRAC	A1	rep1
X	7260795	7269744	proTRAC	A1	rep1
X	7354140	7371258	proTRAC	A1	rep1
X	7582109	7586483	proTRAC	A1	rep1
X	7689782	7698548	proTRAC	A1	rep1
X	7899316	7903699	proTRAC	A1	rep1
X	7993314	8002404	proTRAC	A1	rep1
X	8061785	8069987	proTRAC	A1	rep1
X	8232306	8236517	proTRAC	A1	rep1
X	8931185	8941830	proTRAC	A1	rep1
X	9058811	9064559	proTRAC	A1	rep1
X	9184330	9189237	proTRAC	A1	rep1
X	9229981	9246708	proTRAC	A1	rep1
X	9367010	9373889	proTRAC	A1	rep1
X	9508856	9513712	proTRAC	A1	rep1
X	10352405	10358370	proTRAC	A1	rep1
X	10673955	10681776	proTRAC	A1	rep1
X	11040225	11045620	proTRAC	A1	rep1
X	11311084	11320289	proTRAC	A1	rep1
X	11509210	11520657	proTRAC	A1	rep1
X	12055034	12060566	proTRAC	A1	rep1
X	12124133	12133458	proTRAC	A1	rep1
X	12154115	12165160	proTRAC	A1	rep1
X	12881814	12891212	proTRAC	A1	rep1
X	12908807	12925312	proTRAC	A1	rep1
X	13366419	13370221	proTRAC	A1	rep1
X	13393334	13398514	proTRAC	A1	rep1
X	13693601	13698516	proTRAC	A1	rep1
X	13704088	13711112	proTRAC	A1	rep1
X	13768793	13778449	proTRAC	A1	rep1
X	14302433	14305451	proTRAC	A1	rep1
X	14349483	14358601	proTRAC	A1	rep1
X	14589005	14598165	proTRAC	A1	rep1
X	14787298	14796403	proTRAC	A1	rep1
X	15066407	15070437	proTRAC	A1	rep1
X	15132497	15136103	proTRAC	A1	rep1
X	17046438	17055630	proTRAC	A1	rep1
X	17061342	17072093	proTRAC	A1	rep1
X	17109232	17116808	proTRAC	A1	rep1
X	17683634	17691332	proTRAC	A1	rep1
X	17789694	17796803	proTRAC	A1	rep1
X	17897884	17902715	proTRAC	A1	rep1
X	18093603	18107457	proTRAC	A1	rep1
X	18212618	18217318	proTRAC	A1	rep1
X	18488482	18493353	proTRAC	A1	rep1
X	18534080	18539540	proTRAC	A1	rep1
X	18673606	18688970	proTRAC	A1	rep1
X	18890264	18897882	proTRAC	A1	rep1
X	18980812	18989872	proTRAC	A1	rep1
X	19049001	19074154	proTRAC	A1	rep1
X	19136483	19144832	proTRAC	A1	rep1
X	19181512	19187176	proTRAC	A1	rep1
X	19927352	19949983	proTRAC	A1	rep1
X	19989624	20021315	proTRAC	A1	rep1
X	20867622	20876369	proTRAC	A1	rep1
X	20957949	20963111	proTRAC	A1	rep1
X	21130649	21139252	proTRAC	A1	rep1
X	21148191	21156507	proTRAC	A1	rep1
X	21162216	21169048	proTRAC	A1	rep1
X	21204343	21212259	proTRAC	A1	rep1
X	21243263	21253170	proTRAC	A1	rep1
X	21490502	21521621	proTRAC	A1	rep1
X	21551390	21562137	proTRAC	A1	rep1
X	21598078	22578862	proTRAC	A1	rep1
X	22794725	22802628	proTRAC	A1	rep1
X	22807764	22815317	proTRAC	A1	rep1
X	23099750	23116258	proTRAC	A1	rep1
X	23579620	23584541	proTRAC	A1	rep1
X	23654981	23671304	proTRAC	A1	rep1
X	23899630	23904551	proTRAC	A1	rep1
X	23950065	23980031	proTRAC	A1	rep1
X	23985512	24000173	proTRAC	A1	rep1
X	24032296	24100125	proTRAC	A1	rep1
2R	6168587	6448040	proTRAC	A1	rep2
2R	4392735	4393260	proTRAC	A1	rep2
2R	24019378	24024136	proTRAC	A1	rep2
2R	25157211	25169888	proTRAC	A1	rep2
2R	24890676	24907473	proTRAC	A1	rep2
2R	24807243	24809546	proTRAC	A1	rep2
2R	24825857	24826947	proTRAC	A1	rep2
2L	20216357	20274108	proTRAC	A1	rep2
2L	21599318	21603651	proTRAC	A1	rep2
2L	22815014	22817378	proTRAC	A1	rep2
2L	8355170	8355878	proTRAC	A1	rep2
2L	7817834	7819652	proTRAC	A1	rep2
2L	4954178	4959612	proTRAC	A1	rep2
X	10673266	10693908	proTRAC	A1	rep2
X	3196693	3199823	proTRAC	A1	rep2
X	1229954	1230726	proTRAC	A1	rep2
4	71440	72521	proTRAC	A1	rep2
4	1298365	1306327	proTRAC	A1	rep2
3R	31695803	31699482	proTRAC	A1	rep2
3R	32058342	32074616	proTRAC	A1	rep2
3R	32208761	32210273	proTRAC	A1	rep2
3L	24530973	24576664	proTRAC	A1	rep2
3L	27889719	27897064	proTRAC	A1	rep2
3L	3144840	3155523	proTRAC	A1	rep2
3L	9425947	9428128	proTRAC	A1	rep2
X	3196632	3199914	proTRAC	A1	rep2
2L	969768	977348	proTRAC	A1	rep2
2L	989612	998651	proTRAC	A1	rep2
2L	1213020	1220413	proTRAC	A1	rep2
2L	1396109	1400799	proTRAC	A1	rep2
2L	1556044	1560734	proTRAC	A1	rep2
2L	1577612	1580400	proTRAC	A1	rep2
2L	1685903	1693295	proTRAC	A1	rep2
2L	2106049	2113644	proTRAC	A1	rep2
2L	2567015	2573035	proTRAC	A1	rep2
2L	3078371	3083064	proTRAC	A1	rep2
2L	3200638	3208013	proTRAC	A1	rep2
2L	4003616	4011626	proTRAC	A1	rep2
2L	4484927	4489137	proTRAC	A1	rep2
2L	4865600	4875005	proTRAC	A1	rep2
2L	4889332	4900830	proTRAC	A1	rep2
2L	5220881	5226075	proTRAC	A1	rep2
2L	5577281	5581868	proTRAC	A1	rep2
2L	5729837	5737298	proTRAC	A1	rep2
2L	6316046	6320416	proTRAC	A1	rep2
2L	6471430	6478117	proTRAC	A1	rep2
2L	6571335	6587341	proTRAC	A1	rep2
2L	7898268	7903520	proTRAC	A1	rep2
2L	7935965	7945224	proTRAC	A1	rep2
2L	8947296	8951516	proTRAC	A1	rep2
2L	9108853	9113543	proTRAC	A1	rep2
2L	9150803	9154477	proTRAC	A1	rep2
2L	9364806	9373909	proTRAC	A1	rep2
2L	9601765	9609754	proTRAC	A1	rep2
2L	9697749	9705790	proTRAC	A1	rep2
2L	9744102	9751682	proTRAC	A1	rep2
2L	10082503	10089906	proTRAC	A1	rep2
2L	10146875	10152528	proTRAC	A1	rep2
2L	10502095	10529307	proTRAC	A1	rep2
2L	10598714	10607474	proTRAC	A1	rep2
2L	10644578	10649271	proTRAC	A1	rep2
2L	10953084	10960494	proTRAC	A1	rep2
2L	11007862	11012412	proTRAC	A1	rep2
2L	11091959	11099465	proTRAC	A1	rep2
2L	11170048	11176048	proTRAC	A1	rep2
2L	11353902	11362994	proTRAC	A1	rep2
2L	11462306	11469706	proTRAC	A1	rep2
2L	12175891	12183428	proTRAC	A1	rep2
2L	12384359	12389053	proTRAC	A1	rep2
2L	12451017	12456046	proTRAC	A1	rep2
2L	12867442	12872675	proTRAC	A1	rep2
2L	12900267	12905660	proTRAC	A1	rep2
2L	12936197	12939252	proTRAC	A1	rep2
2L	13056505	13066620	proTRAC	A1	rep2
2L	13143093	13150559	proTRAC	A1	rep2
2L	13191825	13200879	proTRAC	A1	rep2
2L	13597823	13602636	proTRAC	A1	rep2
2L	13667037	13678389	proTRAC	A1	rep2
2L	13808073	13812764	proTRAC	A1	rep2
2L	14009210	14013901	proTRAC	A1	rep2
2L	14122931	14130443	proTRAC	A1	rep2
2L	14846718	14856162	proTRAC	A1	rep2
2L	14873171	14887497	proTRAC	A1	rep2
2L	14947105	14954541	proTRAC	A1	rep2
2L	15032877	15040451	proTRAC	A1	rep2
2L	15058316	15065787	proTRAC	A1	rep2
2L	15257352	15265233	proTRAC	A1	rep2
2L	15324149	15328824	proTRAC	A1	rep2
2L	15484407	15489086	proTRAC	A1	rep2
2L	16045984	16050676	proTRAC	A1	rep2
2L	16165241	16169931	proTRAC	A1	rep2
2L	16248278	16265240	proTRAC	A1	rep2
2L	16608518	16614977	proTRAC	A1	rep2
2L	16628796	16646545	proTRAC	A1	rep2
2L	17104943	17114066	proTRAC	A1	rep2
2L	17181904	17186597	proTRAC	A1	rep2
2L	17340597	17349789	proTRAC	A1	rep2
2L	17410033	17414156	proTRAC	A1	rep2
2L	17627530	17631666	proTRAC	A1	rep2
2L	17702035	17706253	proTRAC	A1	rep2
2L	17997637	18003383	proTRAC	A1	rep2
2L	18285850	18297951	proTRAC	A1	rep2
2L	18447286	18452767	proTRAC	A1	rep2
2L	18528637	18532475	proTRAC	A1	rep2
2L	18855246	18858212	proTRAC	A1	rep2
2L	19270177	19276249	proTRAC	A1	rep2
2L	19841948	19846884	proTRAC	A1	rep2
2L	20172464	20190485	proTRAC	A1	rep2
2L	20406707	20411398	proTRAC	A1	rep2
2L	20816717	20821522	proTRAC	A1	rep2
2L	20837086	20857433	proTRAC	A1	rep2
2L	21471735	21486693	proTRAC	A1	rep2
2L	21521256	21527719	proTRAC	A1	rep2
2L	21581667	21588712	proTRAC	A1	rep2
2L	21864054	21868728	proTRAC	A1	rep2
2L	21896280	21903741	proTRAC	A1	rep2
2L	21927070	21934873	proTRAC	A1	rep2
2L	22104485	22115974	proTRAC	A1	rep2
2L	22184451	22222366	proTRAC	A1	rep2
2L	22237981	22242132	proTRAC	A1	rep2
2L	22619954	22629059	proTRAC	A1	rep2
2L	22647763	22653770	proTRAC	A1	rep2
2L	22679631	22684496	proTRAC	A1	rep2
2L	22884691	22907279	proTRAC	A1	rep2
2L	22921869	22928110	proTRAC	A1	rep2
2L	22934319	22944000	proTRAC	A1	rep2
2L	23326123	23419393	proTRAC	A1	rep2
2R	201241	225095	proTRAC	A1	rep2
2R	240118	300018	proTRAC	A1	rep2
2R	311303	315982	proTRAC	A1	rep2
2R	346822	379499	proTRAC	A1	rep2
2R	473049	501225	proTRAC	A1	rep2
2R	520334	549553	proTRAC	A1	rep2
2R	560034	613163	proTRAC	A1	rep2
2R	685446	706501	proTRAC	A1	rep2
2R	732150	758584	proTRAC	A1	rep2
2R	851954	862367	proTRAC	A1	rep2
2R	1028367	1048287	proTRAC	A1	rep2
2R	1061118	1065900	proTRAC	A1	rep2
2R	1086551	1095372	proTRAC	A1	rep2
2R	1104103	1128094	proTRAC	A1	rep2
2R	1212251	1221138	proTRAC	A1	rep2
2R	1229090	1307865	proTRAC	A1	rep2
2R	1557594	1591226	proTRAC	A1	rep2
2R	1611809	1617836	proTRAC	A1	rep2
2R	1644280	1693951	proTRAC	A1	rep2
2R	1738513	1748684	proTRAC	A1	rep2
2R	1774604	1779178	proTRAC	A1	rep2
2R	1789382	1795051	proTRAC	A1	rep2
2R	1830011	1841310	proTRAC	A1	rep2
2R	1935893	1948409	proTRAC	A1	rep2
2R	1969451	1992052	proTRAC	A1	rep2
2R	2106827	2286006	proTRAC	A1	rep2
2R	2352618	2363700	proTRAC	A1	rep2
2R	2424515	2456847	proTRAC	A1	rep2
2R	2484946	2538151	proTRAC	A1	rep2
2R	2642141	2671918	proTRAC	A1	rep2
2R	2708568	2725132	proTRAC	A1	rep2
2R	2821718	2849384	proTRAC	A1	rep2
2R	2873523	2900133	proTRAC	A1	rep2
2R	2970242	3003319	proTRAC	A1	rep2
2R	3019908	3027041	proTRAC	A1	rep2
2R	3401236	3449699	proTRAC	A1	rep2
2R	3511460	3518737	proTRAC	A1	rep2
2R	3527041	3538263	proTRAC	A1	rep2
2R	3555764	3559854	proTRAC	A1	rep2
2R	3915144	3935297	proTRAC	A1	rep2
2R	3940826	3955896	proTRAC	A1	rep2
2R	3961787	4006835	proTRAC	A1	rep2
2R	4222104	4230183	proTRAC	A1	rep2
2R	4284664	4308692	proTRAC	A1	rep2
2R	4314664	4332566	proTRAC	A1	rep2
2R	4377317	4384482	proTRAC	A1	rep2
2R	4440243	4446514	proTRAC	A1	rep2
2R	4453217	4468712	proTRAC	A1	rep2
2R	4502402	4510672	proTRAC	A1	rep2
2R	4560838	4578120	proTRAC	A1	rep2
2R	4616161	4629086	proTRAC	A1	rep2
2R	4699213	4703036	proTRAC	A1	rep2
2R	4825151	4832575	proTRAC	A1	rep2
2R	4948029	4964506	proTRAC	A1	rep2
2R	4970646	4984284	proTRAC	A1	rep2
2R	5006018	5019168	proTRAC	A1	rep2
2R	5047048	5052587	proTRAC	A1	rep2
2R	5104101	5112737	proTRAC	A1	rep2
2R	5133330	5144456	proTRAC	A1	rep2
2R	5236485	5248318	proTRAC	A1	rep2
2R	5253510	5265557	proTRAC	A1	rep2
2R	5293947	5331471	proTRAC	A1	rep2
2R	5344192	5356852	proTRAC	A1	rep2
2R	5480066	5517911	proTRAC	A1	rep2
2R	5575114	5578040	proTRAC	A1	rep2
2R	5899553	5907928	proTRAC	A1	rep2
2R	6477782	6482749	proTRAC	A1	rep2
2R	6753399	6764467	proTRAC	A1	rep2
2R	8078881	8083511	proTRAC	A1	rep2
2R	8113993	8119245	proTRAC	A1	rep2
2R	8192519	8201279	proTRAC	A1	rep2
2R	8450317	8456446	proTRAC	A1	rep2
2R	8466936	8471609	proTRAC	A1	rep2
2R	8856413	8859212	proTRAC	A1	rep2
2R	9194656	9207649	proTRAC	A1	rep2
2R	10245812	10259981	proTRAC	A1	rep2
2R	10295482	10310899	proTRAC	A1	rep2
2R	10422435	10428253	proTRAC	A1	rep2
2R	10555110	10570199	proTRAC	A1	rep2
2R	10673254	10680906	proTRAC	A1	rep2
2R	10779564	10788660	proTRAC	A1	rep2
2R	10886561	10895769	proTRAC	A1	rep2
2R	10921906	10929567	proTRAC	A1	rep2
2R	11591092	11596124	proTRAC	A1	rep2
2R	12019706	12027193	proTRAC	A1	rep2
2R	12064248	12075562	proTRAC	A1	rep2
2R	12274823	12282752	proTRAC	A1	rep2
2R	12743453	12749839	proTRAC	A1	rep2
2R	14125091	14129786	proTRAC	A1	rep2
2R	14343408	14352498	proTRAC	A1	rep2
2R	14594564	14602005	proTRAC	A1	rep2
2R	14634556	14639232	proTRAC	A1	rep2
2R	14823984	14834928	proTRAC	A1	rep2
2R	15208198	15218046	proTRAC	A1	rep2
2R	15399876	15409171	proTRAC	A1	rep2
2R	16365101	16381310	proTRAC	A1	rep2
2R	16534977	16539969	proTRAC	A1	rep2
2R	17485204	17489351	proTRAC	A1	rep2
2R	17601657	17609783	proTRAC	A1	rep2
2R	18276171	18284418	proTRAC	A1	rep2
2R	18290077	18299183	proTRAC	A1	rep2
2R	18610683	18628442	proTRAC	A1	rep2
2R	18937472	18942147	proTRAC	A1	rep2
2R	18991271	19000362	proTRAC	A1	rep2
2R	19083551	19098656	proTRAC	A1	rep2
2R	19168739	19176489	proTRAC	A1	rep2
2R	19964427	19969667	proTRAC	A1	rep2
2R	20015960	20023410	proTRAC	A1	rep2
2R	20246696	20255061	proTRAC	A1	rep2
2R	20463042	20470684	proTRAC	A1	rep2
2R	21505559	21521553	proTRAC	A1	rep2
2R	21532489	21539851	proTRAC	A1	rep2
2R	21551797	21568042	proTRAC	A1	rep2
2R	21704169	21711641	proTRAC	A1	rep2
2R	21844095	21848769	proTRAC	A1	rep2
2R	21975859	21981678	proTRAC	A1	rep2
2R	22702475	22711575	proTRAC	A1	rep2
2R	22933732	22938465	proTRAC	A1	rep2
2R	23407437	23416507	proTRAC	A1	rep2
2R	24899280	24903953	proTRAC	A1	rep2
3L	294569	312242	proTRAC	A1	rep2
3L	860204	872047	proTRAC	A1	rep2
3L	1273242	1278571	proTRAC	A1	rep2
3L	1376140	1383615	proTRAC	A1	rep2
3L	1876623	1891893	proTRAC	A1	rep2
3L	1912300	1920506	proTRAC	A1	rep2
3L	1988076	2004977	proTRAC	A1	rep2
3L	2137814	2143094	proTRAC	A1	rep2
3L	2196874	2212430	proTRAC	A1	rep2
3L	2708042	2712211	proTRAC	A1	rep2
3L	2873783	2878473	proTRAC	A1	rep2
3L	2924214	2943893	proTRAC	A1	rep2
3L	3194409	3200539	proTRAC	A1	rep2
3L	3303566	3308330	proTRAC	A1	rep2
3L	3699070	3707016	proTRAC	A1	rep2
3L	4311102	4320323	proTRAC	A1	rep2
3L	5066009	5073529	proTRAC	A1	rep2
3L	5258404	5265797	proTRAC	A1	rep2
3L	5452942	5458032	proTRAC	A1	rep2
3L	6083148	6087823	proTRAC	A1	rep2
3L	7175320	7180059	proTRAC	A1	rep2
3L	7214609	7220774	proTRAC	A1	rep2
3L	7335718	7343148	proTRAC	A1	rep2
3L	7590573	7598707	proTRAC	A1	rep2
3L	7860990	7894077	proTRAC	A1	rep2
3L	7986879	7996229	proTRAC	A1	rep2
3L	8224157	8244702	proTRAC	A1	rep2
3L	8315105	8329886	proTRAC	A1	rep2
3L	8406764	8413456	proTRAC	A1	rep2
3L	9938399	9945800	proTRAC	A1	rep2
3L	9981798	9993890	proTRAC	A1	rep2
3L	10313103	10322103	proTRAC	A1	rep2
3L	10929607	10937017	proTRAC	A1	rep2
3L	11100239	11104914	proTRAC	A1	rep2
3L	11121232	11129126	proTRAC	A1	rep2
3L	11454161	11462524	proTRAC	A1	rep2
3L	11823117	11829248	proTRAC	A1	rep2
3L	12594706	12602110	proTRAC	A1	rep2
3L	13105527	13120036	proTRAC	A1	rep2
3L	13346987	13355371	proTRAC	A1	rep2
3L	13670143	13677245	proTRAC	A1	rep2
3L	13746008	13755103	proTRAC	A1	rep2
3L	13972791	13978680	proTRAC	A1	rep2
3L	14054985	14060930	proTRAC	A1	rep2
3L	14206649	14211340	proTRAC	A1	rep2
3L	14233343	14240885	proTRAC	A1	rep2
3L	14312486	14317176	proTRAC	A1	rep2
3L	14765008	14773347	proTRAC	A1	rep2
3L	15924420	15934257	proTRAC	A1	rep2
3L	16359744	16368877	proTRAC	A1	rep2
3L	16506614	16515723	proTRAC	A1	rep2
3L	16787022	16794527	proTRAC	A1	rep2
3L	17011122	17019563	proTRAC	A1	rep2
3L	17126513	17133943	proTRAC	A1	rep2
3L	17618365	17630443	proTRAC	A1	rep2
3L	17701293	17705967	proTRAC	A1	rep2
3L	17730916	17740818	proTRAC	A1	rep2
3L	17751060	17757104	proTRAC	A1	rep2
3L	17893831	17900226	proTRAC	A1	rep2
3L	18040289	18047764	proTRAC	A1	rep2
3L	18317947	18322639	proTRAC	A1	rep2
3L	18516720	18521901	proTRAC	A1	rep2
3L	18634334	18641976	proTRAC	A1	rep2
3L	19104785	19108326	proTRAC	A1	rep2
3L	19234880	19242496	proTRAC	A1	rep2
3L	19270689	19280615	proTRAC	A1	rep2
3L	19382046	19387165	proTRAC	A1	rep2
3L	19697936	19702628	proTRAC	A1	rep2
3L	19741800	19762655	proTRAC	A1	rep2
3L	19768125	19776702	proTRAC	A1	rep2
3L	19846583	19853050	proTRAC	A1	rep2
3L	20004544	20015203	proTRAC	A1	rep2
3L	20028655	20036089	proTRAC	A1	rep2
3L	20174904	20200453	proTRAC	A1	rep2
3L	20232821	20238445	proTRAC	A1	rep2
3L	20328543	20349674	proTRAC	A1	rep2
3L	20433917	20439741	proTRAC	A1	rep2
3L	20725351	20741806	proTRAC	A1	rep2
3L	20947527	20952433	proTRAC	A1	rep2
3L	21977674	21982364	proTRAC	A1	rep2
3L	22112013	22121026	proTRAC	A1	rep2
3L	22715238	22733299	proTRAC	A1	rep2
3L	23022548	23029924	proTRAC	A1	rep2
3L	23053487	23068430	proTRAC	A1	rep2
3L	23205235	23283896	proTRAC	A1	rep2
3L	23509602	23525415	proTRAC	A1	rep2
3L	23548832	23568502	proTRAC	A1	rep2
3L	23580676	23591512	proTRAC	A1	rep2
3L	23615046	23629886	proTRAC	A1	rep2
3L	23696330	23719102	proTRAC	A1	rep2
3L	23741625	23812452	proTRAC	A1	rep2
3L	23859008	23896495	proTRAC	A1	rep2
3L	23931387	23964766	proTRAC	A1	rep2
3L	24941451	24950781	proTRAC	A1	rep2
3L	25013252	25130654	proTRAC	A1	rep2
3L	25632564	25762678	proTRAC	A1	rep2
3L	25784020	25812667	proTRAC	A1	rep2
3L	25870346	25890838	proTRAC	A1	rep2
3L	25908313	25920386	proTRAC	A1	rep2
3L	25939544	25965594	proTRAC	A1	rep2
3L	26006894	26025589	proTRAC	A1	rep2
3L	26169913	26232640	proTRAC	A1	rep2
3L	26246433	26297505	proTRAC	A1	rep2
3L	26477142	26488305	proTRAC	A1	rep2
3L	26533831	26553314	proTRAC	A1	rep2
3L	26561405	26669224	proTRAC	A1	rep2
3L	27037830	27055168	proTRAC	A1	rep2
3L	27105523	27159759	proTRAC	A1	rep2
3L	27278686	27290354	proTRAC	A1	rep2
3L	27335174	27350647	proTRAC	A1	rep2
3L	27393625	27398921	proTRAC	A1	rep2
3L	27445407	27457750	proTRAC	A1	rep2
3L	27498082	27504463	proTRAC	A1	rep2
3L	27532054	27584668	proTRAC	A1	rep2
3L	27630150	27653623	proTRAC	A1	rep2
3L	28055002	28063320	proTRAC	A1	rep2
3L	28144840	28152706	proTRAC	A1	rep2
3R	222503	227999	proTRAC	A1	rep2
3R	247198	266248	proTRAC	A1	rep2
3R	322519	327423	proTRAC	A1	rep2
3R	375175	422160	proTRAC	A1	rep2
3R	430260	465236	proTRAC	A1	rep2
3R	645306	709559	proTRAC	A1	rep2
3R	782651	876917	proTRAC	A1	rep2
3R	1095279	1101015	proTRAC	A1	rep2
3R	1148972	1173919	proTRAC	A1	rep2
3R	1261095	1281901	proTRAC	A1	rep2
3R	1473991	1482901	proTRAC	A1	rep2
3R	1721132	1747562	proTRAC	A1	rep2
3R	1768622	1779440	proTRAC	A1	rep2
3R	1938026	1961819	proTRAC	A1	rep2
3R	2082530	2095468	proTRAC	A1	rep2
3R	2132332	2223760	proTRAC	A1	rep2
3R	2311010	2318660	proTRAC	A1	rep2
3R	2342459	2379919	proTRAC	A1	rep2
3R	2487010	2516275	proTRAC	A1	rep2
3R	2706985	2719252	proTRAC	A1	rep2
3R	2785335	2795030	proTRAC	A1	rep2
3R	2832555	2858145	proTRAC	A1	rep2
3R	2865658	2916282	proTRAC	A1	rep2
3R	2958385	2974568	proTRAC	A1	rep2
3R	3107709	3117458	proTRAC	A1	rep2
3R	3347634	3371570	proTRAC	A1	rep2
3R	3520200	3550080	proTRAC	A1	rep2
3R	3653452	3677345	proTRAC	A1	rep2
3R	3790330	3803610	proTRAC	A1	rep2
3R	3917822	3927490	proTRAC	A1	rep2
3R	4179945	4190636	proTRAC	A1	rep2
3R	4306287	4328450	proTRAC	A1	rep2
3R	4366508	4376265	proTRAC	A1	rep2
3R	4700984	4707225	proTRAC	A1	rep2
3R	4741022	4747041	proTRAC	A1	rep2
3R	4794024	4801435	proTRAC	A1	rep2
3R	4892248	4895134	proTRAC	A1	rep2
3R	5101382	5106071	proTRAC	A1	rep2
3R	5170991	5179532	proTRAC	A1	rep2
3R	5251522	5266514	proTRAC	A1	rep2
3R	5836315	5844267	proTRAC	A1	rep2
3R	5896700	5899503	proTRAC	A1	rep2
3R	6052339	6058465	proTRAC	A1	rep2
3R	6067542	6074350	proTRAC	A1	rep2
3R	6098343	6113018	proTRAC	A1	rep2
3R	6636411	6643322	proTRAC	A1	rep2
3R	6810407	6815315	proTRAC	A1	rep2
3R	7135414	7140089	proTRAC	A1	rep2
3R	7538255	7551169	proTRAC	A1	rep2
3R	7599456	7603818	proTRAC	A1	rep2
3R	7651477	7656168	proTRAC	A1	rep2
3R	7786125	7811263	proTRAC	A1	rep2
3R	7990030	7999255	proTRAC	A1	rep2
3R	8012781	8017480	proTRAC	A1	rep2
3R	8392556	8397007	proTRAC	A1	rep2
3R	8615841	8623283	proTRAC	A1	rep2
3R	8684433	8689126	proTRAC	A1	rep2
3R	9034179	9038094	proTRAC	A1	rep2
3R	9063624	9081000	proTRAC	A1	rep2
3R	9115424	9118236	proTRAC	A1	rep2
3R	9357359	9360922	proTRAC	A1	rep2
3R	9450285	9455750	proTRAC	A1	rep2
3R	9475999	9491377	proTRAC	A1	rep2
3R	9990259	9999380	proTRAC	A1	rep2
3R	10010767	10019857	proTRAC	A1	rep2
3R	10394938	10402678	proTRAC	A1	rep2
3R	10480418	10486233	proTRAC	A1	rep2
3R	10558972	10574207	proTRAC	A1	rep2
3R	10709621	10717019	proTRAC	A1	rep2
3R	10964146	10976137	proTRAC	A1	rep2
3R	11147854	11162882	proTRAC	A1	rep2
3R	11193742	11198318	proTRAC	A1	rep2
3R	11251702	11259311	proTRAC	A1	rep2
3R	11359142	11366640	proTRAC	A1	rep2
3R	11391084	11401887	proTRAC	A1	rep2
3R	11435557	11444670	proTRAC	A1	rep2
3R	11533023	11537714	proTRAC	A1	rep2
3R	12141164	12149290	proTRAC	A1	rep2
3R	12182419	12189672	proTRAC	A1	rep2
3R	12267431	12280360	proTRAC	A1	rep2
3R	12290918	12300021	proTRAC	A1	rep2
3R	12459976	12465217	proTRAC	A1	rep2
3R	12819405	12826593	proTRAC	A1	rep2
3R	13001770	13015308	proTRAC	A1	rep2
3R	13204852	13211857	proTRAC	A1	rep2
3R	13568516	13579341	proTRAC	A1	rep2
3R	13618084	13638836	proTRAC	A1	rep2
3R	13896513	13904599	proTRAC	A1	rep2
3R	13987431	13998226	proTRAC	A1	rep2
3R	14558862	14563383	proTRAC	A1	rep2
3R	14717083	14728241	proTRAC	A1	rep2
3R	15395678	15400353	proTRAC	A1	rep2
3R	15489329	15499314	proTRAC	A1	rep2
3R	16124111	16137867	proTRAC	A1	rep2
3R	16255212	16262842	proTRAC	A1	rep2
3R	17378305	17389503	proTRAC	A1	rep2
3R	17758155	17767267	proTRAC	A1	rep2
3R	17885040	17896268	proTRAC	A1	rep2
3R	18330627	18334162	proTRAC	A1	rep2
3R	18387225	18397239	proTRAC	A1	rep2
3R	18467546	18472222	proTRAC	A1	rep2
3R	18506992	18517995	proTRAC	A1	rep2
3R	19243768	19252919	proTRAC	A1	rep2
3R	19450643	19455348	proTRAC	A1	rep2
3R	19577218	19594002	proTRAC	A1	rep2
3R	19934085	19941787	proTRAC	A1	rep2
3R	20184991	20190150	proTRAC	A1	rep2
3R	20246658	20254134	proTRAC	A1	rep2
3R	20308334	20319078	proTRAC	A1	rep2
3R	20407446	20412776	proTRAC	A1	rep2
3R	20670605	20674726	proTRAC	A1	rep2
3R	20812857	20817550	proTRAC	A1	rep2
3R	20953857	20962406	proTRAC	A1	rep2
3R	21137757	21146851	proTRAC	A1	rep2
3R	21187881	21192233	proTRAC	A1	rep2
3R	21309356	21316177	proTRAC	A1	rep2
3R	21330671	21338105	proTRAC	A1	rep2
3R	21396229	21403808	proTRAC	A1	rep2
3R	22089052	22091742	proTRAC	A1	rep2
3R	22378399	22385809	proTRAC	A1	rep2
3R	22475840	22483521	proTRAC	A1	rep2
3R	22582401	22591193	proTRAC	A1	rep2
3R	22995042	22999733	proTRAC	A1	rep2
3R	23257714	23269050	proTRAC	A1	rep2
3R	23504589	23509264	proTRAC	A1	rep2
3R	23968274	23972495	proTRAC	A1	rep2
3R	24682617	24691729	proTRAC	A1	rep2
3R	24921172	24928054	proTRAC	A1	rep2
3R	25478409	25481840	proTRAC	A1	rep2
3R	25634162	25639114	proTRAC	A1	rep2
3R	25843985	25852463	proTRAC	A1	rep2
3R	27269289	27294691	proTRAC	A1	rep2
3R	27527793	27536897	proTRAC	A1	rep2
3R	27978761	27981819	proTRAC	A1	rep2
3R	28919196	28927867	proTRAC	A1	rep2
3R	29160708	29168618	proTRAC	A1	rep2
3R	29223790	29230240	proTRAC	A1	rep2
3R	30282264	30296629	proTRAC	A1	rep2
3R	30786474	30794349	proTRAC	A1	rep2
3R	30845021	30852599	proTRAC	A1	rep2
3R	30858630	30873914	proTRAC	A1	rep2
3R	31149004	31156405	proTRAC	A1	rep2
3R	32110110	32114584	proTRAC	A1	rep2
4	98	23611	proTRAC	A1	rep2
4	30801	48792	proTRAC	A1	rep2
4	114797	147823	proTRAC	A1	rep2
4	182494	189466	proTRAC	A1	rep2
4	195874	203280	proTRAC	A1	rep2
4	507342	545790	proTRAC	A1	rep2
4	681903	688245	proTRAC	A1	rep2
4	730964	746856	proTRAC	A1	rep2
4	799154	807610	proTRAC	A1	rep2
4	924369	934345	proTRAC	A1	rep2
4	1045311	1049296	proTRAC	A1	rep2
4	1071940	1076918	proTRAC	A1	rep2
4	1149770	1160484	proTRAC	A1	rep2
4	1262800	1265879	proTRAC	A1	rep2
4	1290007	1295513	proTRAC	A1	rep2
U_0	7529	16618	proTRAC	A1	rep2
U_1	14789	28838	proTRAC	A1	rep2
U_12	6207	10896	proTRAC	A1	rep2
U_17	1	25134	proTRAC	A1	rep2
U_19	16576	30465	proTRAC	A1	rep2
U_20	2	28053	proTRAC	A1	rep2
U_22	14469	17906	proTRAC	A1	rep2
U_23	6215	10908	proTRAC	A1	rep2
U_24	453	58674	proTRAC	A1	rep2
U_24	67289	86662	proTRAC	A1	rep2
U_25	50513	54404	proTRAC	A1	rep2
U_25	66984	121497	proTRAC	A1	rep2
U_28	11027	19230	proTRAC	A1	rep2
U_3	20	25622	proTRAC	A1	rep2
U_30	8441	10689	proTRAC	A1	rep2
U_31	3938	8597	proTRAC	A1	rep2
U_33	22318	27003	proTRAC	A1	rep2
U_34	12098	16773	proTRAC	A1	rep2
U_36	214	10584	proTRAC	A1	rep2
U_37	6298	20432	proTRAC	A1	rep2
U_4	5559	20888	proTRAC	A1	rep2
U_44	9772	26537	proTRAC	A1	rep2
U_45	12	19680	proTRAC	A1	rep2
U_48	1	119103	proTRAC	A1	rep2
U_52	7547	21320	proTRAC	A1	rep2
U_55	48943	59843	proTRAC	A1	rep2
U_56	1	23216	proTRAC	A1	rep2
U_63	13256	22333	proTRAC	A1	rep2
U_68	11034	14676	proTRAC	A1	rep2
U_69	30524	35417	proTRAC	A1	rep2
U_7	1507	6629	proTRAC	A1	rep2
U_7	22204	44393	proTRAC	A1	rep2
U_8	14772	19582	proTRAC	A1	rep2
X	208615	216905	proTRAC	A1	rep2
X	430668	435450	proTRAC	A1	rep2
X	730885	738400	proTRAC	A1	rep2
X	865762	878021	proTRAC	A1	rep2
X	900052	909452	proTRAC	A1	rep2
X	1260294	1267932	proTRAC	A1	rep2
X	1352811	1361175	proTRAC	A1	rep2
X	2709289	2717944	proTRAC	A1	rep2
X	3004468	3012311	proTRAC	A1	rep2
X	3103683	3111665	proTRAC	A1	rep2
X	3985998	3993400	proTRAC	A1	rep2
X	4032900	4040783	proTRAC	A1	rep2
X	4299406	4308497	proTRAC	A1	rep2
X	4531726	4557512	proTRAC	A1	rep2
X	4793447	4800845	proTRAC	A1	rep2
X	4924596	4930845	proTRAC	A1	rep2
X	5082467	5090996	proTRAC	A1	rep2
X	5209586	5214325	proTRAC	A1	rep2
X	5583108	5592078	proTRAC	A1	rep2
X	6131794	6139858	proTRAC	A1	rep2
X	6240571	6260197	proTRAC	A1	rep2
X	6270063	6290901	proTRAC	A1	rep2
X	6715442	6721576	proTRAC	A1	rep2
X	6800493	6805184	proTRAC	A1	rep2
X	6866975	6871665	proTRAC	A1	rep2
X	7114362	7133802	proTRAC	A1	rep2
X	7260845	7268513	proTRAC	A1	rep2
X	7358307	7363021	proTRAC	A1	rep2
X	7582110	7586093	proTRAC	A1	rep2
X	7689782	7698544	proTRAC	A1	rep2
X	7899272	7910295	proTRAC	A1	rep2
X	7993314	8002405	proTRAC	A1	rep2
X	8232307	8236517	proTRAC	A1	rep2
X	8931176	8942120	proTRAC	A1	rep2
X	9054372	9063241	proTRAC	A1	rep2
X	9184029	9189307	proTRAC	A1	rep2
X	9234678	9246712	proTRAC	A1	rep2
X	9367043	9373889	proTRAC	A1	rep2
X	9470493	9479162	proTRAC	A1	rep2
X	10352408	10367746	proTRAC	A1	rep2
X	10674093	10681537	proTRAC	A1	rep2
X	11040945	11049964	proTRAC	A1	rep2
X	11312283	11319900	proTRAC	A1	rep2
X	11509093	11521463	proTRAC	A1	rep2
X	12055038	12060566	proTRAC	A1	rep2
X	12124132	12133458	proTRAC	A1	rep2
X	12160476	12165151	proTRAC	A1	rep2
X	12881815	12891210	proTRAC	A1	rep2
X	12916643	12925310	proTRAC	A1	rep2
X	13366201	13370150	proTRAC	A1	rep2
X	13393348	13399749	proTRAC	A1	rep2
X	13693201	13698722	proTRAC	A1	rep2
X	13704082	13713114	proTRAC	A1	rep2
X	13768793	13780308	proTRAC	A1	rep2
X	14302433	14305442	proTRAC	A1	rep2
X	14349483	14358603	proTRAC	A1	rep2
X	14589004	14597986	proTRAC	A1	rep2
X	14787297	14796404	proTRAC	A1	rep2
X	15066407	15070434	proTRAC	A1	rep2
X	15127329	15136104	proTRAC	A1	rep2
X	17046437	17056085	proTRAC	A1	rep2
X	17061613	17071718	proTRAC	A1	rep2
X	17108853	17116705	proTRAC	A1	rep2
X	17683646	17691334	proTRAC	A1	rep2
X	17789933	17797788	proTRAC	A1	rep2
X	17897886	17902732	proTRAC	A1	rep2
X	18093604	18098297	proTRAC	A1	rep2
X	18212619	18217312	proTRAC	A1	rep2
X	18488671	18493344	proTRAC	A1	rep2
X	18673606	18681413	proTRAC	A1	rep2
X	18890315	18897683	proTRAC	A1	rep2
X	18980810	18997150	proTRAC	A1	rep2
X	19049004	19074154	proTRAC	A1	rep2
X	19136342	19144288	proTRAC	A1	rep2
X	19927352	19954302	proTRAC	A1	rep2
X	19989623	20012980	proTRAC	A1	rep2
X	20871125	20876470	proTRAC	A1	rep2
X	20955889	20963114	proTRAC	A1	rep2
X	21132667	21139252	proTRAC	A1	rep2
X	21146803	21172844	proTRAC	A1	rep2
X	21204318	21212094	proTRAC	A1	rep2
X	21238320	21257457	proTRAC	A1	rep2
X	21287846	21295796	proTRAC	A1	rep2
X	21488905	21521580	proTRAC	A1	rep2
X	21598029	22576980	proTRAC	A1	rep2
X	22790857	22802630	proTRAC	A1	rep2
X	22807760	22815368	proTRAC	A1	rep2
X	23096905	23116716	proTRAC	A1	rep2
X	23579638	23585880	proTRAC	A1	rep2
X	23654997	23671322	proTRAC	A1	rep2
X	23899648	23904549	proTRAC	A1	rep2
X	23985511	24000175	proTRAC	A1	rep2
X	24083560	24090749	proTRAC	A1	rep2
X	2066281	2072298	proTRAC	A2	rep1
X	3148150	3153128	proTRAC	A2	rep1
X	8161684	8167360	proTRAC	A2	rep1
X	11458543	11460731	proTRAC	A2	rep1
X	12591523	12612769	proTRAC	A2	rep1
X	13892311	13904007	proTRAC	A2	rep1
X	21684471	21687910	proTRAC	A2	rep1
X	23224624	23226990	proTRAC	A2	rep1
2L	31669	40605	proTRAC	A2	rep1
2L	126333	133544	proTRAC	A2	rep1
2L	1742458	1744725	proTRAC	A2	rep1
2L	6039609	6043685	proTRAC	A2	rep1
2L	7882329	7884818	proTRAC	A2	rep1
2L	20153606	20215368	proTRAC	A2	rep1
2L	22140259	22154363	proTRAC	A2	rep1
2L	22574847	22579921	proTRAC	A2	rep1
2L	22590450	22595622	proTRAC	A2	rep1
2L	23102396	23105024	proTRAC	A2	rep1
2L	23111529	23121976	proTRAC	A2	rep1
2L	23221935	23277652	proTRAC	A2	rep1
2L	23304460	23348087	proTRAC	A2	rep1
2R	5796438	6070924	proTRAC	A2	rep1
2R	4437688	4500257	proTRAC	A2	rep1
2R	3892304	3904430	proTRAC	A2	rep1
2R	3948664	3958310	proTRAC	A2	rep1
2R	2594399	2604738	proTRAC	A2	rep1
2R	2514676	2519339	proTRAC	A2	rep1
2R	2306394	2310071	proTRAC	A2	rep1
2R	2295655	2296547	proTRAC	A2	rep1
2R	13845471	13848171	proTRAC	A2	rep1
3L	8613449	8620315	proTRAC	A2	rep1
3L	9354941	9357937	proTRAC	A2	rep1
3L	11565351	11568258	proTRAC	A2	rep1
3L	21234067	21239255	proTRAC	A2	rep1
3L	21582340	21586248	proTRAC	A2	rep1
3L	25171381	25216028	proTRAC	A2	rep1
3L	25082575	25095285	proTRAC	A2	rep1
3L	25258883	25291146	proTRAC	A2	rep1
3L	25484156	25500966	proTRAC	A2	rep1
3R	847301	1056225	proTRAC	A2	rep1
3R	3997137	4022506	proTRAC	A2	rep1
3R	3760885	3915876	proTRAC	A2	rep1
4	968116	985708	proTRAC	A2	rep1
4	987847	1002982	proTRAC	A2	rep1
4	1522556	1548671	proTRAC	A2	rep1
2L	91734	95225	proTRAC	A2	rep1
2L	405286	413325	proTRAC	A2	rep1
2L	997224	1008436	proTRAC	A2	rep1
2L	1704403	1711761	proTRAC	A2	rep1
2L	2026649	2034489	proTRAC	A2	rep1
2L	2166983	2189379	proTRAC	A2	rep1
2L	2290138	2304024	proTRAC	A2	rep1
2L	2496147	2504013	proTRAC	A2	rep1
2L	2513639	2519386	proTRAC	A2	rep1
2L	2897117	2907862	proTRAC	A2	rep1
2L	2963164	2971308	proTRAC	A2	rep1
2L	3204715	3212324	proTRAC	A2	rep1
2L	3217873	3223170	proTRAC	A2	rep1
2L	3327995	3337178	proTRAC	A2	rep1
2L	3551554	3568005	proTRAC	A2	rep1
2L	4147537	4157220	proTRAC	A2	rep1
2L	4468474	4478223	proTRAC	A2	rep1
2L	5823714	5830010	proTRAC	A2	rep1
2L	5866292	5873952	proTRAC	A2	rep1
2L	6123014	6129587	proTRAC	A2	rep1
2L	7165502	7175254	proTRAC	A2	rep1
2L	7212643	7219868	proTRAC	A2	rep1
2L	7727538	7730187	proTRAC	A2	rep1
2L	8636222	8641546	proTRAC	A2	rep1
2L	8714092	8719656	proTRAC	A2	rep1
2L	9083905	9086722	proTRAC	A2	rep1
2L	9221731	9233269	proTRAC	A2	rep1
2L	9446640	9451904	proTRAC	A2	rep1
2L	9468346	9484192	proTRAC	A2	rep1
2L	9702465	9709980	proTRAC	A2	rep1
2L	9911307	9919631	proTRAC	A2	rep1
2L	10098912	10110139	proTRAC	A2	rep1
2L	10189212	10194438	proTRAC	A2	rep1
2L	10220070	10231699	proTRAC	A2	rep1
2L	10572998	10593772	proTRAC	A2	rep1
2L	11034714	11041143	proTRAC	A2	rep1
2L	11477752	11488654	proTRAC	A2	rep1
2L	11952432	11961545	proTRAC	A2	rep1
2L	12093920	12100242	proTRAC	A2	rep1
2L	12258761	12264356	proTRAC	A2	rep1
2L	12405302	12426166	proTRAC	A2	rep1
2L	12505823	12514814	proTRAC	A2	rep1
2L	12552891	12561983	proTRAC	A2	rep1
2L	13038680	13047621	proTRAC	A2	rep1
2L	13173586	13181200	proTRAC	A2	rep1
2L	13400815	13407189	proTRAC	A2	rep1
2L	13623400	13628383	proTRAC	A2	rep1
2L	13951551	13965718	proTRAC	A2	rep1
2L	14006227	14013803	proTRAC	A2	rep1
2L	14464488	14477830	proTRAC	A2	rep1
2L	14510322	14518217	proTRAC	A2	rep1
2L	14542576	14548492	proTRAC	A2	rep1
2L	15523618	15528364	proTRAC	A2	rep1
2L	15690968	15698645	proTRAC	A2	rep1
2L	16102842	16107983	proTRAC	A2	rep1
2L	16850604	16860409	proTRAC	A2	rep1
2L	17026067	17033405	proTRAC	A2	rep1
2L	17173637	17179789	proTRAC	A2	rep1
2L	17423400	17427115	proTRAC	A2	rep1
2L	17466228	17476010	proTRAC	A2	rep1
2L	17611280	17620536	proTRAC	A2	rep1
2L	17651077	17656188	proTRAC	A2	rep1
2L	17933938	17937812	proTRAC	A2	rep1
2L	18084592	18090059	proTRAC	A2	rep1
2L	18636193	18641151	proTRAC	A2	rep1
2L	18841739	18848852	proTRAC	A2	rep1
2L	19188468	19196784	proTRAC	A2	rep1
2L	19249147	19256653	proTRAC	A2	rep1
2L	19525141	19542325	proTRAC	A2	rep1
2L	19751471	19759580	proTRAC	A2	rep1
2L	19845305	19852849	proTRAC	A2	rep1
2L	19937952	19946411	proTRAC	A2	rep1
2L	20105083	20128926	proTRAC	A2	rep1
2L	20276440	20281063	proTRAC	A2	rep1
2L	20370885	20375715	proTRAC	A2	rep1
2L	20497404	20506180	proTRAC	A2	rep1
2L	20571522	20580189	proTRAC	A2	rep1
2L	20600422	20605936	proTRAC	A2	rep1
2L	21015945	21028303	proTRAC	A2	rep1
2L	21233916	21246019	proTRAC	A2	rep1
2L	21365325	21383526	proTRAC	A2	rep1
2L	21388830	21401251	proTRAC	A2	rep1
2L	21583284	21600835	proTRAC	A2	rep1
2L	21927864	21935869	proTRAC	A2	rep1
2L	21957488	21970894	proTRAC	A2	rep1
2L	22089903	22105525	proTRAC	A2	rep1
2L	22140199	22143017	proTRAC	A2	rep1
2L	22217701	22230858	proTRAC	A2	rep1
2L	22244481	22264081	proTRAC	A2	rep1
2L	22273455	22282794	proTRAC	A2	rep1
2L	22650419	22657318	proTRAC	A2	rep1
2L	22678457	22688831	proTRAC	A2	rep1
2L	22701810	22709324	proTRAC	A2	rep1
2L	22739739	22763138	proTRAC	A2	rep1
2L	22794008	22798840	proTRAC	A2	rep1
2L	22930417	22938706	proTRAC	A2	rep1
2L	22962688	22976048	proTRAC	A2	rep1
2L	22990080	22996287	proTRAC	A2	rep1
2L	23411361	23426717	proTRAC	A2	rep1
2R	68247	73029	proTRAC	A2	rep1
2R	90811	102518	proTRAC	A2	rep1
2R	127384	161347	proTRAC	A2	rep1
2R	175736	217539	proTRAC	A2	rep1
2R	306344	319634	proTRAC	A2	rep1
2R	327611	351849	proTRAC	A2	rep1
2R	378331	395719	proTRAC	A2	rep1
2R	639901	651907	proTRAC	A2	rep1
2R	797013	803380	proTRAC	A2	rep1
2R	1054961	1085423	proTRAC	A2	rep1
2R	1139012	1151764	proTRAC	A2	rep1
2R	1364834	1422670	proTRAC	A2	rep1
2R	1444604	1505504	proTRAC	A2	rep1
2R	1512186	1520899	proTRAC	A2	rep1
2R	1588805	1668587	proTRAC	A2	rep1
2R	1842379	1877059	proTRAC	A2	rep1
2R	1948640	1970729	proTRAC	A2	rep1
2R	2014827	2114266	proTRAC	A2	rep1
2R	2119661	2157515	proTRAC	A2	rep1
2R	2208043	2246197	proTRAC	A2	rep1
2R	2391942	2444410	proTRAC	A2	rep1
2R	2453026	2493190	proTRAC	A2	rep1
2R	2537717	2548125	proTRAC	A2	rep1
2R	2678126	2697498	proTRAC	A2	rep1
2R	2752534	2758940	proTRAC	A2	rep1
2R	2796201	2801483	proTRAC	A2	rep1
2R	2830799	2844193	proTRAC	A2	rep1
2R	3251256	3281123	proTRAC	A2	rep1
2R	3375691	3418304	proTRAC	A2	rep1
2R	3654532	3658643	proTRAC	A2	rep1
2R	3678622	3718626	proTRAC	A2	rep1
2R	3734405	3743501	proTRAC	A2	rep1
2R	3753815	3762305	proTRAC	A2	rep1
2R	3770319	3775367	proTRAC	A2	rep1
2R	4016800	4022084	proTRAC	A2	rep1
2R	4071612	4087624	proTRAC	A2	rep1
2R	4120517	4128508	proTRAC	A2	rep1
2R	4163255	4192760	proTRAC	A2	rep1
2R	4266252	4311369	proTRAC	A2	rep1
2R	4687600	4710437	proTRAC	A2	rep1
2R	4765806	4781899	proTRAC	A2	rep1
2R	4786949	4793342	proTRAC	A2	rep1
2R	4840152	4844976	proTRAC	A2	rep1
2R	4985928	4991104	proTRAC	A2	rep1
2R	5051369	5057293	proTRAC	A2	rep1
2R	5084546	5092054	proTRAC	A2	rep1
2R	5156124	5180002	proTRAC	A2	rep1
2R	6331965	6341064	proTRAC	A2	rep1
2R	6369495	6376836	proTRAC	A2	rep1
2R	6415286	6423977	proTRAC	A2	rep1
2R	6732345	6744031	proTRAC	A2	rep1
2R	7267513	7275876	proTRAC	A2	rep1
2R	7311136	7316011	proTRAC	A2	rep1
2R	8717426	8726739	proTRAC	A2	rep1
2R	8963150	8972247	proTRAC	A2	rep1
2R	9236643	9248866	proTRAC	A2	rep1
2R	9380008	9390264	proTRAC	A2	rep1
2R	9683777	9687881	proTRAC	A2	rep1
2R	9877664	9887081	proTRAC	A2	rep1
2R	9906671	9915218	proTRAC	A2	rep1
2R	10150733	10160277	proTRAC	A2	rep1
2R	10180603	10184875	proTRAC	A2	rep1
2R	10472961	10480086	proTRAC	A2	rep1
2R	11125369	11133165	proTRAC	A2	rep1
2R	12556103	12564665	proTRAC	A2	rep1
2R	13140194	13147723	proTRAC	A2	rep1
2R	13869046	13872674	proTRAC	A2	rep1
2R	14512524	14516616	proTRAC	A2	rep1
2R	15176161	15184101	proTRAC	A2	rep1
2R	15237325	15246584	proTRAC	A2	rep1
2R	16236985	16245320	proTRAC	A2	rep1
2R	16561331	16564896	proTRAC	A2	rep1
2R	17040588	17046374	proTRAC	A2	rep1
2R	17466582	17475055	proTRAC	A2	rep1
2R	17806466	17816428	proTRAC	A2	rep1
2R	17915123	17924264	proTRAC	A2	rep1
2R	18172902	18178156	proTRAC	A2	rep1
2R	18347958	18357067	proTRAC	A2	rep1
2R	18644836	18654217	proTRAC	A2	rep1
2R	18674102	18681944	proTRAC	A2	rep1
2R	19283426	19292516	proTRAC	A2	rep1
2R	19909144	19912205	proTRAC	A2	rep1
2R	20520969	20547301	proTRAC	A2	rep1
2R	20686760	20691797	proTRAC	A2	rep1
2R	20774849	20788906	proTRAC	A2	rep1
2R	21114413	21123227	proTRAC	A2	rep1
2R	21415377	21423105	proTRAC	A2	rep1
2R	21479561	21484814	proTRAC	A2	rep1
2R	21817304	21823404	proTRAC	A2	rep1
2R	22077243	22084464	proTRAC	A2	rep1
2R	22423635	22429067	proTRAC	A2	rep1
2R	22809587	22832767	proTRAC	A2	rep1
2R	22992151	22999655	proTRAC	A2	rep1
2R	23292158	23299446	proTRAC	A2	rep1
2R	24054830	24064271	proTRAC	A2	rep1
2R	24100811	24109744	proTRAC	A2	rep1
2R	24342263	24350020	proTRAC	A2	rep1
3L	544679	547739	proTRAC	A2	rep1
3L	933729	937659	proTRAC	A2	rep1
3L	1521259	1530289	proTRAC	A2	rep1
3L	2098264	2103926	proTRAC	A2	rep1
3L	3426240	3433599	proTRAC	A2	rep1
3L	3838222	3849957	proTRAC	A2	rep1
3L	3910407	3915660	proTRAC	A2	rep1
3L	4639588	4643815	proTRAC	A2	rep1
3L	4779250	4786605	proTRAC	A2	rep1
3L	5237774	5246962	proTRAC	A2	rep1
3L	5897481	5904881	proTRAC	A2	rep1
3L	5923071	5932497	proTRAC	A2	rep1
3L	5958020	5965719	proTRAC	A2	rep1
3L	6177051	6184412	proTRAC	A2	rep1
3L	6228666	6233999	proTRAC	A2	rep1
3L	7745013	7754462	proTRAC	A2	rep1
3L	8131725	8139079	proTRAC	A2	rep1
3L	8153397	8157521	proTRAC	A2	rep1
3L	8546288	8556142	proTRAC	A2	rep1
3L	8573025	8580652	proTRAC	A2	rep1
3L	9059608	9065121	proTRAC	A2	rep1
3L	9656103	9665192	proTRAC	A2	rep1
3L	9748959	9758438	proTRAC	A2	rep1
3L	9795325	9798007	proTRAC	A2	rep1
3L	9936914	9944795	proTRAC	A2	rep1
3L	9956310	9965406	proTRAC	A2	rep1
3L	9976775	9982122	proTRAC	A2	rep1
3L	10041265	10046309	proTRAC	A2	rep1
3L	11196977	11206504	proTRAC	A2	rep1
3L	11445499	11456770	proTRAC	A2	rep1
3L	12607580	12612582	proTRAC	A2	rep1
3L	13508836	13514214	proTRAC	A2	rep1
3L	13717279	13720018	proTRAC	A2	rep1
3L	14035780	14043377	proTRAC	A2	rep1
3L	14692446	14699788	proTRAC	A2	rep1
3L	15052484	15059874	proTRAC	A2	rep1
3L	15611297	15618302	proTRAC	A2	rep1
3L	16636748	16650003	proTRAC	A2	rep1
3L	17504128	17509641	proTRAC	A2	rep1
3L	17864186	17869605	proTRAC	A2	rep1
3L	18012132	18014395	proTRAC	A2	rep1
3L	18173233	18177719	proTRAC	A2	rep1
3L	18340722	18346537	proTRAC	A2	rep1
3L	18745136	18752820	proTRAC	A2	rep1
3L	18883334	18888471	proTRAC	A2	rep1
3L	19030225	19033693	proTRAC	A2	rep1
3L	19051109	19058549	proTRAC	A2	rep1
3L	19318905	19327803	proTRAC	A2	rep1
3L	19628537	19638124	proTRAC	A2	rep1
3L	19663311	19674442	proTRAC	A2	rep1
3L	19719604	19725267	proTRAC	A2	rep1
3L	19933891	19943146	proTRAC	A2	rep1
3L	20099057	20112395	proTRAC	A2	rep1
3L	20475915	20489469	proTRAC	A2	rep1
3L	20671152	20679056	proTRAC	A2	rep1
3L	20869157	20875542	proTRAC	A2	rep1
3L	21512507	21522095	proTRAC	A2	rep1
3L	21605942	21612923	proTRAC	A2	rep1
3L	21647777	21659787	proTRAC	A2	rep1
3L	21667956	21683163	proTRAC	A2	rep1
3L	22012387	22030840	proTRAC	A2	rep1
3L	22152135	22160375	proTRAC	A2	rep1
3L	22455373	22461252	proTRAC	A2	rep1
3L	22781404	22802039	proTRAC	A2	rep1
3L	22817573	22825274	proTRAC	A2	rep1
3L	22845910	22856725	proTRAC	A2	rep1
3L	22936316	22941169	proTRAC	A2	rep1
3L	22994720	23039906	proTRAC	A2	rep1
3L	23063734	23093851	proTRAC	A2	rep1
3L	23134811	23158925	proTRAC	A2	rep1
3L	23322567	23341692	proTRAC	A2	rep1
3L	23637920	23648488	proTRAC	A2	rep1
3L	23659582	23710354	proTRAC	A2	rep1
3L	23764857	23769833	proTRAC	A2	rep1
3L	23803001	23830912	proTRAC	A2	rep1
3L	23937748	23942668	proTRAC	A2	rep1
3L	24129627	24158086	proTRAC	A2	rep1
3L	24176668	24181004	proTRAC	A2	rep1
3L	24237136	24243091	proTRAC	A2	rep1
3L	24252664	24261514	proTRAC	A2	rep1
3L	24297005	24323160	proTRAC	A2	rep1
3L	24368498	24408099	proTRAC	A2	rep1
3L	24427441	24438344	proTRAC	A2	rep1
3L	24455409	24465904	proTRAC	A2	rep1
3L	24475666	24533768	proTRAC	A2	rep1
3L	24551624	24574866	proTRAC	A2	rep1
3L	24599302	24629512	proTRAC	A2	rep1
3L	24669344	24675337	proTRAC	A2	rep1
3L	24725339	24737897	proTRAC	A2	rep1
3L	24801115	24830924	proTRAC	A2	rep1
3L	24840142	24843922	proTRAC	A2	rep1
3L	24875351	24891510	proTRAC	A2	rep1
3L	24977098	25077910	proTRAC	A2	rep1
3L	25156074	25160261	proTRAC	A2	rep1
3L	25447869	25476057	proTRAC	A2	rep1
3L	25518717	25521740	proTRAC	A2	rep1
3L	25672407	25701877	proTRAC	A2	rep1
3L	25962295	25971113	proTRAC	A2	rep1
3L	25988628	26009719	proTRAC	A2	rep1
3L	26068269	26102920	proTRAC	A2	rep1
3L	26139098	26165539	proTRAC	A2	rep1
3L	26199219	26231824	proTRAC	A2	rep1
3L	26241936	26268713	proTRAC	A2	rep1
3L	26329268	26360867	proTRAC	A2	rep1
3L	26444681	26474234	proTRAC	A2	rep1
3L	26490038	26504754	proTRAC	A2	rep1
3L	26525519	26544394	proTRAC	A2	rep1
3L	26565500	26589809	proTRAC	A2	rep1
3L	26595072	26608063	proTRAC	A2	rep1
3L	26663106	26700100	proTRAC	A2	rep1
3L	26723034	26730657	proTRAC	A2	rep1
3L	26858602	26934815	proTRAC	A2	rep1
3L	26967571	27047504	proTRAC	A2	rep1
3L	27075437	27105312	proTRAC	A2	rep1
3L	27141246	27183241	proTRAC	A2	rep1
3L	27241015	27285064	proTRAC	A2	rep1
3L	27314776	27346706	proTRAC	A2	rep1
3L	27374232	27377521	proTRAC	A2	rep1
3L	27384230	27394635	proTRAC	A2	rep1
3L	27405508	27429620	proTRAC	A2	rep1
3L	27443596	27470185	proTRAC	A2	rep1
3L	27481005	27537422	proTRAC	A2	rep1
3L	27545262	27549430	proTRAC	A2	rep1
3L	27562003	27576653	proTRAC	A2	rep1
3L	27619199	27653722	proTRAC	A2	rep1
3L	27732506	27805086	proTRAC	A2	rep1
3L	27862918	27871844	proTRAC	A2	rep1
3L	27905095	27912952	proTRAC	A2	rep1
3L	27980601	27993503	proTRAC	A2	rep1
3L	28035901	28041228	proTRAC	A2	rep1
3L	28074432	28132877	proTRAC	A2	rep1
3L	28190538	28202864	proTRAC	A2	rep1
3L	28236658	28264249	proTRAC	A2	rep1
3L	28274379	28279999	proTRAC	A2	rep1
3L	28294831	28314110	proTRAC	A2	rep1
3L	28331246	28419123	proTRAC	A2	rep1
3L	28436616	28504422	proTRAC	A2	rep1
3L	28671604	28681286	proTRAC	A2	rep1
3L	28689755	28772690	proTRAC	A2	rep1
3L	29019314	29036302	proTRAC	A2	rep1
3L	29085803	29096678	proTRAC	A2	rep1
3L	29146244	29199916	proTRAC	A2	rep1
3R	192728	237602	proTRAC	A2	rep1
3R	267671	272819	proTRAC	A2	rep1
3R	301415	336058	proTRAC	A2	rep1
3R	363670	368684	proTRAC	A2	rep1
3R	407017	436489	proTRAC	A2	rep1
3R	642844	652191	proTRAC	A2	rep1
3R	755254	801511	proTRAC	A2	rep1
3R	884420	896516	proTRAC	A2	rep1
3R	1151222	1156432	proTRAC	A2	rep1
3R	1188661	1211518	proTRAC	A2	rep1
3R	1249730	1267920	proTRAC	A2	rep1
3R	1287673	1375496	proTRAC	A2	rep1
3R	1700755	1706681	proTRAC	A2	rep1
3R	1727275	1738963	proTRAC	A2	rep1
3R	1746753	1777109	proTRAC	A2	rep1
3R	2112029	2131291	proTRAC	A2	rep1
3R	2175637	2182634	proTRAC	A2	rep1
3R	2203564	2258718	proTRAC	A2	rep1
3R	2457207	2465234	proTRAC	A2	rep1
3R	2515854	2528890	proTRAC	A2	rep1
3R	2555214	2571465	proTRAC	A2	rep1
3R	2632183	2651666	proTRAC	A2	rep1
3R	2920035	2922536	proTRAC	A2	rep1
3R	2931044	2945992	proTRAC	A2	rep1
3R	2952108	2969663	proTRAC	A2	rep1
3R	2986334	2992314	proTRAC	A2	rep1
3R	3002919	3006037	proTRAC	A2	rep1
3R	3076271	3086007	proTRAC	A2	rep1
3R	3565126	3633448	proTRAC	A2	rep1
3R	3641223	3650361	proTRAC	A2	rep1
3R	3679425	3688083	proTRAC	A2	rep1
3R	3975257	3988471	proTRAC	A2	rep1
3R	4293470	4302389	proTRAC	A2	rep1
3R	4329103	4336064	proTRAC	A2	rep1
3R	4417119	4426000	proTRAC	A2	rep1
3R	4607620	4613363	proTRAC	A2	rep1
3R	4753749	4766501	proTRAC	A2	rep1
3R	4876350	4881886	proTRAC	A2	rep1
3R	6062470	6069283	proTRAC	A2	rep1
3R	6166250	6177308	proTRAC	A2	rep1
3R	6264034	6266322	proTRAC	A2	rep1
3R	6449024	6458230	proTRAC	A2	rep1
3R	6804348	6813431	proTRAC	A2	rep1
3R	7393406	7400785	proTRAC	A2	rep1
3R	7719805	7726810	proTRAC	A2	rep1
3R	7879148	7884502	proTRAC	A2	rep1
3R	8771703	8776700	proTRAC	A2	rep1
3R	9434788	9439336	proTRAC	A2	rep1
3R	9814148	9819648	proTRAC	A2	rep1
3R	9987754	9995420	proTRAC	A2	rep1
3R	10554305	10561668	proTRAC	A2	rep1
3R	10619748	10624244	proTRAC	A2	rep1
3R	11162334	11167009	proTRAC	A2	rep1
3R	11251753	11257296	proTRAC	A2	rep1
3R	11266686	11275751	proTRAC	A2	rep1
3R	11326517	11331299	proTRAC	A2	rep1
3R	11499754	11509173	proTRAC	A2	rep1
3R	11639615	11647057	proTRAC	A2	rep1
3R	11693720	11696716	proTRAC	A2	rep1
3R	12100426	12106105	proTRAC	A2	rep1
3R	12351288	12358222	proTRAC	A2	rep1
3R	13017772	13024267	proTRAC	A2	rep1
3R	13064317	13074800	proTRAC	A2	rep1
3R	13687137	13690993	proTRAC	A2	rep1
3R	13788284	13793749	proTRAC	A2	rep1
3R	13926484	13934017	proTRAC	A2	rep1
3R	14270331	14278679	proTRAC	A2	rep1
3R	14737050	14744438	proTRAC	A2	rep1
3R	14752413	14759404	proTRAC	A2	rep1
3R	15394781	15408473	proTRAC	A2	rep1
3R	15441315	15449048	proTRAC	A2	rep1
3R	15800206	15807719	proTRAC	A2	rep1
3R	16075356	16084446	proTRAC	A2	rep1
3R	16227804	16233184	proTRAC	A2	rep1
3R	16242982	16248086	proTRAC	A2	rep1
3R	16924593	16932041	proTRAC	A2	rep1
3R	17030430	17037439	proTRAC	A2	rep1
3R	17797327	17802237	proTRAC	A2	rep1
3R	18001822	18007075	proTRAC	A2	rep1
3R	18217332	18225782	proTRAC	A2	rep1
3R	18903176	18921770	proTRAC	A2	rep1
3R	18963358	18969868	proTRAC	A2	rep1
3R	19436146	19443733	proTRAC	A2	rep1
3R	20983670	20991265	proTRAC	A2	rep1
3R	21439059	21456081	proTRAC	A2	rep1
3R	21714911	21723693	proTRAC	A2	rep1
3R	23955595	23962402	proTRAC	A2	rep1
3R	27515982	27521004	proTRAC	A2	rep1
3R	27925004	27932571	proTRAC	A2	rep1
3R	28266962	28271661	proTRAC	A2	rep1
3R	28347289	28354787	proTRAC	A2	rep1
3R	29389773	29398131	proTRAC	A2	rep1
3R	29624016	29627877	proTRAC	A2	rep1
3R	30159919	30162715	proTRAC	A2	rep1
3R	30238217	30247307	proTRAC	A2	rep1
3R	30580440	30588037	proTRAC	A2	rep1
3R	30627469	30635971	proTRAC	A2	rep1
3R	30843317	30851166	proTRAC	A2	rep1
3R	31254035	31270034	proTRAC	A2	rep1
3R	31280167	31291149	proTRAC	A2	rep1
3R	31908220	31920508	proTRAC	A2	rep1
4	5014	35068	proTRAC	A2	rep1
4	98613	108538	proTRAC	A2	rep1
4	124739	136478	proTRAC	A2	rep1
4	183868	190864	proTRAC	A2	rep1
4	269875	278266	proTRAC	A2	rep1
4	314876	322077	proTRAC	A2	rep1
4	333070	337705	proTRAC	A2	rep1
4	528031	538270	proTRAC	A2	rep1
4	590535	597445	proTRAC	A2	rep1
4	664646	679047	proTRAC	A2	rep1
4	759098	792724	proTRAC	A2	rep1
4	1128462	1135218	proTRAC	A2	rep1
4	1191497	1199912	proTRAC	A2	rep1
U_0	21855	34820	proTRAC	A2	rep1
U_0	46826	54661	proTRAC	A2	rep1
U_0	76364	87150	proTRAC	A2	rep1
U_10	891	19223	proTRAC	A2	rep1
U_104	6	9562	proTRAC	A2	rep1
U_108	2568	27904	proTRAC	A2	rep1
U_111	12786	19792	proTRAC	A2	rep1
U_116	23546	33081	proTRAC	A2	rep1
U_121	32774	48675	proTRAC	A2	rep1
U_122	13803	48488	proTRAC	A2	rep1
U_124	1	18322	proTRAC	A2	rep1
U_127	8156	17007	proTRAC	A2	rep1
U_128	13724	27525	proTRAC	A2	rep1
U_130	15626	22630	proTRAC	A2	rep1
U_133	31960	36911	proTRAC	A2	rep1
U_139	13617	28623	proTRAC	A2	rep1
U_140	48213	69549	proTRAC	A2	rep1
U_142	6241	15318	proTRAC	A2	rep1
U_143	50755	55744	proTRAC	A2	rep1
U_143	77699	84872	proTRAC	A2	rep1
U_144	11039	20156	proTRAC	A2	rep1
U_145	19350	23518	proTRAC	A2	rep1
U_148	1	3568	proTRAC	A2	rep1
U_152	19211	28647	proTRAC	A2	rep1
U_157	2	27724	proTRAC	A2	rep1
U_157	49722	55652	proTRAC	A2	rep1
U_158	1	29720	proTRAC	A2	rep1
U_159	23018	41991	proTRAC	A2	rep1
U_161	2294	23204	proTRAC	A2	rep1
U_161	29351	35587	proTRAC	A2	rep1
U_163	1255	13469	proTRAC	A2	rep1
U_164	13895	26939	proTRAC	A2	rep1
U_164	38019	57318	proTRAC	A2	rep1
U_164	83480	97518	proTRAC	A2	rep1
U_18	5072	8881	proTRAC	A2	rep1
U_18	20294	27512	proTRAC	A2	rep1
U_22	6	6464	proTRAC	A2	rep1
U_22	12951	33397	proTRAC	A2	rep1
U_23	23	15650	proTRAC	A2	rep1
U_26	3	83665	proTRAC	A2	rep1
U_27	8538	15937	proTRAC	A2	rep1
U_3	7283	41613	proTRAC	A2	rep1
U_32	29635	38823	proTRAC	A2	rep1
U_37	21700	26710	proTRAC	A2	rep1
U_39	8504	11257	proTRAC	A2	rep1
U_40	13634	62406	proTRAC	A2	rep1
U_43	9036	18104	proTRAC	A2	rep1
U_45	19321	24247	proTRAC	A2	rep1
U_45	52487	59832	proTRAC	A2	rep1
U_46	46	53968	proTRAC	A2	rep1
U_47	1	39928	proTRAC	A2	rep1
U_5	2	8433	proTRAC	A2	rep1
U_50	16411	29119	proTRAC	A2	rep1
U_51	31869	37369	proTRAC	A2	rep1
U_51	206334	214055	proTRAC	A2	rep1
U_52	13719	18908	proTRAC	A2	rep1
U_53	10369	17875	proTRAC	A2	rep1
U_57	44639	47713	proTRAC	A2	rep1
U_6	11487	20591	proTRAC	A2	rep1
U_61	9571	18587	proTRAC	A2	rep1
U_62	17979	25832	proTRAC	A2	rep1
U_62	47006	57077	proTRAC	A2	rep1
U_64	3255	12022	proTRAC	A2	rep1
U_65	24	7060	proTRAC	A2	rep1
U_65	15466	19719	proTRAC	A2	rep1
U_65	42441	52922	proTRAC	A2	rep1
U_66	10	17952	proTRAC	A2	rep1
U_7	1	7919	proTRAC	A2	rep1
U_7	13206	25363	proTRAC	A2	rep1
U_70	9918	18838	proTRAC	A2	rep1
U_72	95	11956	proTRAC	A2	rep1
U_72	26263	33880	proTRAC	A2	rep1
U_73	7	7248	proTRAC	A2	rep1
U_75	56221	63634	proTRAC	A2	rep1
U_78	191	17901	proTRAC	A2	rep1
U_78	29430	39129	proTRAC	A2	rep1
U_79	25	18750	proTRAC	A2	rep1
U_8	2	43752	proTRAC	A2	rep1
U_8	73824	80239	proTRAC	A2	rep1
U_83	44458	90303	proTRAC	A2	rep1
U_84	26	17896	proTRAC	A2	rep1
U_87	10707	18094	proTRAC	A2	rep1
U_88	52	23715	proTRAC	A2	rep1
U_88	33144	46499	proTRAC	A2	rep1
U_88	54008	57662	proTRAC	A2	rep1
U_9	12507	41561	proTRAC	A2	rep1
U_90	9585	18629	proTRAC	A2	rep1
U_92	10203	17884	proTRAC	A2	rep1
U_93	14240	23209	proTRAC	A2	rep1
U_93	39904	54409	proTRAC	A2	rep1
U_95	4	23504	proTRAC	A2	rep1
U_96	2	26087	proTRAC	A2	rep1
X	391978	399530	proTRAC	A2	rep1
X	475110	479492	proTRAC	A2	rep1
X	655875	666022	proTRAC	A2	rep1
X	812012	830291	proTRAC	A2	rep1
X	866413	873664	proTRAC	A2	rep1
X	2079147	2121312	proTRAC	A2	rep1
X	3013903	3021328	proTRAC	A2	rep1
X	3255015	3270428	proTRAC	A2	rep1
X	3983446	3990485	proTRAC	A2	rep1
X	4521785	4530887	proTRAC	A2	rep1
X	4597859	4606944	proTRAC	A2	rep1
X	4817073	4830504	proTRAC	A2	rep1
X	6014015	6021467	proTRAC	A2	rep1
X	6589291	6596874	proTRAC	A2	rep1
X	6707430	6712943	proTRAC	A2	rep1
X	7691064	7699839	proTRAC	A2	rep1
X	8097177	8105480	proTRAC	A2	rep1
X	8446156	8453642	proTRAC	A2	rep1
X	9259410	9267989	proTRAC	A2	rep1
X	9821391	9824539	proTRAC	A2	rep1
X	10447181	10455209	proTRAC	A2	rep1
X	10736107	10739822	proTRAC	A2	rep1
X	10805098	10816852	proTRAC	A2	rep1
X	10871406	10877435	proTRAC	A2	rep1
X	11302043	11305468	proTRAC	A2	rep1
X	12097960	12111252	proTRAC	A2	rep1
X	12169849	12174237	proTRAC	A2	rep1
X	12314613	12319314	proTRAC	A2	rep1
X	13117930	13123225	proTRAC	A2	rep1
X	13426080	13432366	proTRAC	A2	rep1
X	13507321	13512626	proTRAC	A2	rep1
X	13789239	13796811	proTRAC	A2	rep1
X	14105305	14122305	proTRAC	A2	rep1
X	15591811	15623492	proTRAC	A2	rep1
X	15640515	15651113	proTRAC	A2	rep1
X	16224554	16232227	proTRAC	A2	rep1
X	16495568	16503018	proTRAC	A2	rep1
X	17272195	17275266	proTRAC	A2	rep1
X	17920265	17934002	proTRAC	A2	rep1
X	18282391	18284862	proTRAC	A2	rep1
X	18793867	18797297	proTRAC	A2	rep1
X	19691415	19706441	proTRAC	A2	rep1
X	19766682	19774329	proTRAC	A2	rep1
X	19847131	19873321	proTRAC	A2	rep1
X	19963483	19972744	proTRAC	A2	rep1
X	20101894	20110983	proTRAC	A2	rep1
X	20658831	20665617	proTRAC	A2	rep1
[truncated: 7,417 more rows]
