# Supplementary material for: Rapid evolution of piRNA clusters in the Drosophila melanogaster ovary
Source: HighWire-hosted journal article supplement (doi:10.1101/gr.278062.123), 2024-05-01
Supplement: Supplemental_Material.zip [file Supplementary_Table_S5.xlsx]

## Sheet: Table S5 legend
Supplementary Table S5. Analyzed Structural Variants summary counts.

## Sheet: raw_SV_counts
5815	A1	cuteSV
7043	A2	cuteSV
9419	A4	cuteSV
9982	A7	cuteSV
5809	B3	cuteSV
7501	B6	cuteSV
1034	iso-1	cuteSV
7074	OreR	cuteSV
3464	A1	sniffles
4435	A2	sniffles
2513	A4	sniffles
2717	A7	sniffles
2866	B3	sniffles
2743	B6	sniffles
1231	iso-1	sniffles
2414	OreR	sniffles
2412	A1	svim
3061	A2	svim
2669	A4	svim
3371	A7	svim
2649	B3	svim
2520	B6	svim
432	iso-1	svim
2542	OreR	svim

## Sheet: genotyped_SV_counts
## INDEL counts after raw calls were merged, genotyped using cuteSV, collapsed, and filtered by agreement between callers and average intra-strain frequency (read support).
6028	A1
6212	A2
6147	A4
8142	A7
6481	B3
6027	B6
532	iso-1
6499	OreR
11615	D_simulans_wxd1
11666	D_sechelia_25
