# Supplementary material for: Rapid evolution of piRNA clusters in the Drosophila melanogaster ovary
Source: HighWire-hosted journal article supplement (doi:10.1101/gr.278062.123), 2024-05-01
Supplement: Supplemental_Material.zip [file Supplementary_Table_S6.xlsx]

## Sheet: Sheet1
Supplementary Table S6. Filtered and polarized INDEL calls. All calls are in iso-1/R6 coordinates.

## Sheet: polarized_INS
chrom	start	end	length	SV
2R	5623417	5623417	774	INS
3L	17731522	17731522	63	INS
3R	324387	324387	141	INS
X	6606795	6606795	95	INS
X	19596831	19596831	305	INS
X	564414	564414	640	INS
X	12796904	12796904	671	INS
X	21033357	21033357	2587	INS
2L	364064	364064	34	INS
2L	364229	364229	381	INS
2R	20409671	20409978	-307	INS
3L	4485680	4485815	-135	INS
3L	19507197	19509134	-1937	INS
X	21567992	21568024	-32	INS
3L	11816840	11816886	-46	INS
X	3713155	3713207	-52	INS
X	7871394	7871466	-72	INS
2L	187061	187221	-160	INS
3R	11198038	11198082	-44	INS
2R	17176407	17182543	-6136	INS
3L	19365949	19365992	-43	INS
X	6392926	6397638	-4712	INS
3R	724263	724602	-339	INS
X	8364895	8365238	-343	INS
X	20150420	20150455	-35	INS
2R	7371799	7371848	-49	INS
2R	17798460	17798873	-413	INS
X	6171638	6179016	-7378	INS
X	3437037	3437125	-88	INS
X	10218350	10218856	-506	INS
3L	5910083	5910269	-186	INS
3R	22549572	22549737	-165	INS
2L	17144383	17151855	-7472	INS
2L	21323459	21323490	-31	INS
3R	24416558	24416875	-317	INS
3R	24416518	24416859	-341	INS
3R	24730138	24732461	-2323	INS
X	21328172	21328227	-55	INS
X	10312392	10312495	-103	INS
X	19125729	19125760	-31	INS
3L	19115691	19115814	-123	INS
3L	8481824	8490928	-9104	INS
2L	20407858	20412888	-5030	INS
3L	23001068	23001160	-92	INS
3L	1485755	1486866	-1111	INS
3L	2035156	2035289	-133	INS
X	4823515	4823993	-478	INS
X	12511372	12511405	-33	INS
2R	14723067	14723145	-78	INS
3R	28253388	28255844	-2456	INS
3L	11444322	11444353	-31	INS
3L	12830640	12830723	-83	INS
3L	3565680	3565748	-68	INS
3R	9235602	9235699	-97	INS
3R	31955357	31955520	-163	INS
X	5739704	5739794	-90	INS
3R	14756679	14756772	-93	INS
3R	28173722	28181098	-7376	INS
3L	9164747	9166159	-1412	INS
3L	14524370	14528766	-4396	INS
X	12557646	12557687	-41	INS
3R	21624156	21624196	-40	INS
3L	21361777	21362678	-901	INS
2L	22037490	22037533	-43	INS
2L	3251544	3259055	-7511	INS
2R	14093489	14109586	-16097	INS
3R	13312966	13313772	-806	INS
3R	29882071	29891174	-9103	INS
3R	4599352	4599383	-31	INS
X	5345450	5345506	-56	INS
3R	20245333	20248818	-3485	INS
2L	13449516	13456898	-7382	INS
3L	8233611	8238816	-5205	INS
2R	15229389	15229553	-164	INS
3L	21637640	21637928	-288	INS
3R	25324418	25328824	-4406	INS
3L	10053409	10053467	-58	INS
3L	1506051	1513593	-7542	INS
3L	925226	932598	-7372	INS
2L	10592894	10600503	-7609	INS
2L	2933371	2935476	-2105	INS
3L	5022846	5022889	-43	INS
2R	22465373	22465515	-142	INS
3R	31156387	31156461	-74	INS
2R	12789347	12797656	-8309	INS
3R	9696900	9696939	-39	INS
2L	12731106	12735820	-4714	INS
2L	20568713	20569049	-336	INS
3L	11849381	11849423	-42	INS
3L	16945782	16954881	-9099	INS
3R	27791684	27794728	-3044	INS
2L	16153788	16160788	-7000	INS
2R	21753138	21753566	-428	INS
2R	9212744	9213173	-429	INS
2R	23529626	23537126	-7500	INS
3L	5537772	5538056	-284	INS
3R	6779026	6779101	-75	INS
2L	9393549	9396461	-2912	INS
3R	18500764	18500830	-66	INS
3L	18710812	18718710	-7898	INS
3R	10022565	10022722	-157	INS
3R	21761174	21768507	-7333	INS
2L	18051928	18060756	-8828	INS
2R	10585611	10594140	-8529	INS
2R	22503835	22503871	-36	INS
2R	24177287	24184717	-7430	INS
3L	1154185	1163280	-9095	INS
3L	3601349	3606567	-5218	INS
3L	16573608	16573958	-350	INS
2R	8722815	8722999	-184	INS
2R	24270851	24271005	-154	INS
3L	3833791	3833974	-183	INS
3R	6206335	6206498	-163	INS
3L	16845067	16845125	-58	INS
3R	26552813	26552956	-143	INS
3R	11379288	11388388	-9100	INS
2L	19762860	19763047	-187	INS
3L	4470633	4470664	-31	INS
2L	7676374	7676639	-265	INS
3R	10255433	10260818	-5385	INS
3L	13299444	13299482	-38	INS
3R	12926784	12926836	-52	INS
3L	14296035	14296465	-430	INS
2L	9603327	9603499	-172	INS
2L	9862404	9862448	-44	INS
2L	21860382	21860476	-94	INS
3R	8207609	8208397	-788	INS
3R	10957935	10963256	-5321	INS
2L	19394015	19394075	-60	INS
2R	17236562	17241711	-5149	INS
2L	7343378	7350438	-7060	INS
3R	11308923	11309004	-81	INS
3R	27342845	27351371	-8526	INS
3R	23630953	23631102	-149	INS
2L	11676377	11676408	-31	INS
2R	11224140	11224256	-116	INS
3L	3475128	3475516	-388	INS
2L	7579282	7579426	-144	INS
3L	15257502	15257640	-138	INS
3L	21014968	21023394	-8426	INS
3R	30317378	30324917	-7539	INS
3R	6121218	6121334	-116	INS
2L	1883482	1883997	-515	INS
3L	21736398	21736544	-146	INS
3R	9278834	9284009	-5175	INS
3R	16620423	16620509	-86	INS
2R	5876921	5876968	-47	INS
3L	12033727	12033776	-49	INS
3L	19342813	19342850	-37	INS
2L	21110703	21110735	-32	INS
2R	5947126	5947184	-58	INS
3R	10143386	10143485	-99	INS
3R	31691585	31696297	-4712	INS
3L	16220539	16220571	-32	INS
3L	16616563	16621816	-5253	INS
2L	721246	721393	-147	INS
2R	14911749	14911818	-69	INS
2L	11828552	11828663	-111	INS
3R	5139049	5139115	-66	INS
2L	12781854	12789244	-7390	INS
2L	3388652	3388834	-182	INS
2R	11207870	11208008	-138	INS
3R	5973395	5973441	-46	INS
3R	15059334	15059470	-136	INS
3L	14576216	14576289	-73	INS
3L	11887308	11887355	-47	INS
2L	8980510	8980545	-35	INS
3L	9130608	9134314	-3706	INS
2R	22908412	22908487	-75	INS
2R	22907457	22907495	-38	INS
3R	15618783	15626203	-7420	INS
2L	13036294	13036481	-187	INS
3L	10735866	10735911	-45	INS
2L	10640692	10640727	-35	INS
2R	20667390	20667446	-56	INS
2R	13580550	13580846	-296	INS
2L	14642623	14651648	-9025	INS
3R	25832739	25841867	-9128	INS
3L	7871088	7871130	-42	INS
3R	24493108	24493280	-172	INS
2L	12763905	12764053	-148	INS
2L	9177971	9178118	-147	INS
2L	13067922	13068010	-88	INS
3L	1805761	1805868	-107	INS
2R	13925893	13926011	-118	INS
3L	7885199	7885235	-36	INS
3L	10328155	10328212	-57	INS
3R	13669143	13669185	-42	INS
3L	15843093	15843180	-87	INS
2L	10646938	10646992	-54	INS
3L	7278139	7278298	-159	INS
2R	18079394	18084797	-5403	INS
2R	18079396	18081467	-2071	INS
3R	24594689	24594873	-184	INS
2L	47513	52564	-5051	INS
2L	360401	360704	-303	INS
2L	2772649	2779177	-6528	INS
2L	22272621	22272656	-35	INS
2R	5140070	5140135	-65	INS
2R	5425183	5425222	-39	INS
2L	22384120	22389532	-5412	INS
2R	4079485	4079681	-196	INS
2R	5264256	5285056	-20800	INS
2R	5308942	5309158	-216	INS
2R	5409617	5409751	-134	INS
2R	4297626	4297657	-31	INS
2R	5473419	5473460	-41	INS
2R	5678849	5679075	-226	INS
2L	22582025	22583723	-1698	INS
2L	22629195	22629634	-439	INS
2L	22639293	22639352	-59	INS
2L	22659918	22660353	-435	INS
2R	4702528	4702610	-82	INS
2L	23018375	23018434	-59	INS
2L	23092584	23092877	-293	INS
2L	454811	455471	-660	INS
2R	6664236	6665982	-1746	INS
2L	23342425	23342856	-431	INS
2L	23353253	23357969	-4716	INS
2R	7209896	7217594	-7698	INS
2L	23388095	23388501	-406	INS
2L	23405709	23414825	-9116	INS
2L	23415792	23417617	-1825	INS
2R	7661232	7661980	-748	INS
2R	7829841	7832958	-3117	INS
2R	7945365	7945475	-110	INS
2R	8015697	8017665	-1968	INS
2R	38131	38487	-356	INS
2L	4181314	4183892	-2578	INS
2R	356149	447437	-91288	INS
2R	529376	537944	-8568	INS
2R	5246730	5246989	-259	INS
2R	1059847	1067702	-7855	INS
2R	19452138	19452324	-186	INS
2R	12337554	12337606	-52	INS
2L	4939096	4939214	-118	INS
2R	2409080	2421412	-12332	INS
2R	2499039	2508132	-9093	INS
2R	2656147	2658721	-2574	INS
2R	4054731	4057464	-2733	INS
2R	4054736	4077543	-22807	INS
2R	4330798	4335497	-4699	INS
2R	4432257	4439281	-7024	INS
2L	4939997	4940130	-133	INS
2L	4063025	4063073	-48	INS
2R	4641998	4649376	-7378	INS
2R	4659321	4668820	-9499	INS
2R	17963374	17963449	-75	INS
2R	4694170	4694206	-36	INS
2R	20600274	20600311	-37	INS
2R	18358444	18372601	-14157	INS
2R	4968352	4968394	-42	INS
2L	5369829	5370172	-343	INS
2R	5039428	5039811	-383	INS
2R	5040823	5041137	-314	INS
2R	16775698	16775905	-207	INS
2R	5217750	5222897	-5147	INS
2R	5232471	5232599	-128	INS
2R	5311296	5311495	-199	INS
2R	5335918	5336794	-876	INS
2R	5483204	5483239	-35	INS
2R	5502434	5502656	-222	INS
2R	5503018	5503049	-31	INS
2R	5560313	5569228	-8915	INS
2R	15373154	15373425	-271	INS
2R	5720031	5720396	-365	INS
2R	5768519	5768552	-33	INS
2R	5790518	5790549	-31	INS
2R	5863609	5864180	-571	INS
2R	6096771	6101915	-5144	INS
2R	23402663	23407685	-5022	INS
2R	6330297	6337677	-7380	INS
2R	6494577	6499285	-4708	INS
2R	6579825	6584856	-5031	INS
3L	2222408	2222722	-314	INS
3L	108669	108747	-78	INS
2R	6952219	6959745	-7526	INS
2R	7001505	7007858	-6353	INS
2R	7139973	7141410	-1437	INS
2R	7196623	7201344	-4721	INS
2R	7434946	7439193	-4247	INS
2R	24234791	24235734	-943	INS
2R	7862292	7867340	-5048	INS
2R	7869247	7873975	-4728	INS
2R	8157933	8157967	-34	INS
2R	8330915	8331346	-431	INS
3L	2751502	2755743	-4241	INS
2R	8398263	8402990	-4727	INS
3L	2966776	2974146	-7370	INS
3L	3040374	3042108	-1734	INS
3L	3051798	3051982	-184	INS
2R	8566086	8566982	-896	INS
3L	4328785	4336228	-7443	INS
3L	4450211	4456710	-6499	INS
2R	9352277	9361371	-9094	INS
2R	9480129	9490605	-10476	INS
3L	4840444	4840499	-55	INS
2R	9726667	9734163	-7496	INS
2R	9871004	9871093	-89	INS
2R	10005901	10007012	-1111	INS
3L	1740907	1741093	-186	INS
2R	10176930	10186042	-9112	INS
3L	5926368	5926502	-134	INS
2L	6414518	6414833	-315	INS
2L	4601757	4609144	-7387	INS
2R	10948078	10955533	-7455	INS
2R	10979706	10980117	-411	INS
2L	770516	772243	-1727	INS
2R	11009868	11018989	-9121	INS
2L	4661876	4669402	-7526	INS
2R	11297669	11301717	-4048	INS
2R	11415567	11418661	-3094	INS
2R	11472697	11473827	-1130	INS
3L	8225408	8225440	-32	INS
3L	18157769	18157812	-43	INS
3L	18189638	18190186	-548	INS
2R	12481188	12482927	-1739	INS
2R	12707571	12715882	-8311	INS
2R	12827443	12827678	-235	INS
2R	12857206	12868657	-11451	INS
3L	7388260	7388314	-54	INS
2R	13410590	13415456	-4866	INS
2R	13439161	13439223	-62	INS
2R	13728188	13735519	-7331	INS
2R	13905654	13907582	-1928	INS
2L	4918220	4923238	-5018	INS
3L	11087111	11088845	-1734	INS
3L	11315955	11316076	-121	INS
2R	14467346	14476231	-8885	INS
2R	14497437	14498530	-1093	INS
2R	14700542	14700628	-86	INS
2R	15004779	15005046	-267	INS
2R	15015510	15022879	-7369	INS
2R	15119370	15127797	-8427	INS
3L	15474720	15474797	-77	INS
2R	15340744	15349273	-8529	INS
2L	686970	695926	-8956	INS
2L	7066505	7067221	-716	INS
3L	23461109	23461229	-120	INS
2R	16061780	16064358	-2578	INS
3L	23675322	23675577	-255	INS
2R	16539690	16544830	-5140	INS
3L	23825414	23839599	-14185	INS
3L	23877258	23877379	-121	INS
2R	17147295	17152271	-4976	INS
2L	5343067	5345044	-1977	INS
2R	17277266	17277620	-354	INS
2R	17782400	17783549	-1149	INS
3L	15085093	15086205	-1112	INS
3L	24226149	24226188	-39	INS
3L	24266869	24266900	-31	INS
2R	18045721	18046018	-297	INS
3L	15557478	15557625	-147	INS
2R	18111737	18115530	-3793	INS
3L	13338047	13338107	-60	INS
3L	15899275	15899784	-509	INS
2R	18590921	18600018	-9097	INS
2L	5571484	5571800	-316	INS
3L	19468183	19468377	-194	INS
2R	18858291	18860008	-1717	INS
3L	17730903	17738137	-7234	INS
2R	19611157	19615878	-4721	INS
3L	17799860	17801594	-1734	INS
3L	15658685	15658715	-30	INS
2R	19776646	19779915	-3269	INS
2R	19957483	19962631	-5148	INS
3L	25627854	25627886	-32	INS
2R	20368564	20377647	-9083	INS
3L	25810591	25810623	-32	INS
3L	25813113	25813389	-276	INS
3L	25814614	25814690	-76	INS
3L	25815284	25824698	-9414	INS
2R	20544571	20545206	-635	INS
2L	976932	984513	-7581	INS
2R	20739496	20744210	-4714	INS
2R	20783354	20788071	-4717	INS
3L	26007395	26007724	-329	INS
3L	23234041	23234179	-138	INS
2R	21540738	21540887	-149	INS
3L	26356871	26362298	-5427	INS
2R	21738335	21747440	-9105	INS
3L	19739925	19776079	-36154	INS
2R	21809580	21817766	-8186	INS
3L	19820337	19827769	-7432	INS
3L	23860824	23861713	-889	INS
3L	23862199	23864099	-1900	INS
2L	5827760	5836714	-8954	INS
3L	20334937	20334972	-35	INS
2R	22349743	22351473	-1730	INS
3L	20821333	20824773	-3440	INS
2R	22525808	22529285	-3477	INS
2R	22580468	22586383	-5915	INS
2R	22588188	22588228	-40	INS
3L	21306200	21315275	-9075	INS
2R	22775019	22775376	-357	INS
2R	22843076	22844983	-1907	INS
3L	19398953	19403614	-4661	INS
2L	996772	1005816	-9044	INS
3L	27343632	27349007	-5375	INS
3L	27394215	27414619	-20404	INS
3L	22745059	22745126	-67	INS
3L	23052959	23053213	-254	INS
2R	23914351	23921921	-7570	INS
3L	27672168	27674193	-2025	INS
2R	24235590	24235905	-315	INS
2R	24353480	24361788	-8308	INS
2R	24590165	24590203	-38	INS
3L	27898045	27898104	-59	INS
2R	24727935	24735388	-7453	INS
3L	23480299	23480458	-159	INS
2R	24763660	24765582	-1922	INS
3L	23496944	23497182	-238	INS
3L	23513966	23514090	-124	INS
3L	23515380	23523225	-7845	INS
3L	23526232	23526264	-32	INS
2R	25104828	25104898	-70	INS
2R	25141707	25159343	-17636	INS
2R	25162883	25163088	-205	INS
2R	25201767	25202000	-233	INS
3L	21810006	21810047	-41	INS
3L	26482452	26513962	-31510	INS
3L	19399700	19403655	-3955	INS
3L	110267	119379	-9112	INS
3L	23135337	23142551	-7214	INS
3L	23146544	23179138	-32594	INS
3L	24311604	24311850	-246	INS
3R	984057	984403	-346	INS
3R	1029152	1029202	-50	INS
3L	789966	790395	-429	INS
3L	858051	866445	-8394	INS
3L	939822	940880	-1058	INS
2L	6363201	6366059	-2858	INS
3L	24494383	24494902	-519	INS
3R	1338727	1341409	-2682	INS
3R	1341395	1341490	-95	INS
3R	1496154	1496253	-99	INS
3L	1219645	1227323	-7678	INS
3L	1246247	1247275	-1028	INS
3R	106122	106169	-47	INS
3L	1424830	1430020	-5190	INS
3L	25081446	25086934	-5488	INS
3L	25168280	25175663	-7383	INS
2L	6426910	6445116	-18206	INS
3L	25390224	25390507	-283	INS
3L	25428341	25428861	-520	INS
3L	26775190	26775562	-372	INS
3R	615019	621157	-6138	INS
3R	725175	725412	-237	INS
3R	2965906	2965942	-36	INS
3L	2447557	2456657	-9100	INS
3R	3148539	3148628	-89	INS
3L	27011291	27070706	-59415	INS
3L	26687047	26687704	-657	INS
3R	3391319	3391352	-33	INS
3L	2927892	2936114	-8222	INS
3L	3061337	3069865	-8528	INS
3R	114689	114726	-37	INS
3R	2085174	2095495	-10321	INS
3R	118487	118897	-410	INS
3R	2218427	2218500	-73	INS
3R	209940	209992	-52	INS
3R	4114254	4126665	-12411	INS
3L	23271742	23276784	-5042	INS
3L	3638612	3638679	-67	INS
2L	6613471	6613593	-122	INS
3R	4733727	4733796	-69	INS
3L	27469677	27475288	-5611	INS
3L	4773707	4774363	-656	INS
3L	4901181	4907316	-6135	INS
3L	5034211	5043309	-9098	INS
3R	3792260	3833789	-41529	INS
3L	5045512	5050238	-4726	INS
3L	5104530	5124609	-20079	INS
3L	23824077	23824429	-352	INS
3L	5299203	5306577	-7374	INS
3R	727993	728078	-85	INS
3R	4719535	4719676	-141	INS
3R	4943665	4943715	-50	INS
3R	1378706	1388578	-9872	INS
3L	6001736	6004382	-2646	INS
3L	6002129	6002181	-52	INS
3L	6040415	6042716	-2301	INS
3R	1684601	1685686	-1085	INS
3R	6821392	6821453	-61	INS
3L	6220969	6230067	-9098	INS
3R	1959917	1960430	-513	INS
3L	6335063	6335474	-411	INS
3L	6405712	6432121	-26409	INS
3R	2087536	2087597	-61	INS
3R	7349762	7355304	-5542	INS
3L	6620629	6621010	-381	INS
2L	9069726	9069765	-39	INS
3L	6781176	6783131	-1955	INS
3R	2387520	2387561	-41	INS
3R	7558581	7562257	-3676	INS
3L	6855978	6860705	-4727	INS
3L	6887570	6895008	-7438	INS
3L	6994936	6995489	-553	INS
3R	2824453	2831453	-7000	INS
3R	3115230	3115300	-70	INS
3L	7377367	7380379	-3012	INS
3R	3422827	3422864	-37	INS
3L	7498804	7503526	-4722	INS
3R	4366809	4375139	-8330	INS
3R	4408461	4412712	-4251	INS
3R	4753292	4757541	-4249	INS
3L	7886566	7889030	-2464	INS
3L	7916884	7926000	-9116	INS
3L	7985417	7987690	-2273	INS
3L	8019744	8024109	-4365	INS
3R	5002382	5009139	-6757	INS
3R	5026922	5027031	-109	INS
3R	10338701	10341306	-2605	INS
2L	9529116	9529172	-56	INS
3L	8498350	8505763	-7413	INS
3L	25842072	25842175	-103	INS
3L	8707737	8707790	-53	INS
2L	7111809	7111840	-31	INS
3R	15903585	15907634	-4049	INS
3R	16534502	16534536	-34	INS
3L	9219297	9219914	-617	INS
3L	9386112	9387334	-1222	INS
3L	9392525	9395291	-2766	INS
3L	9443557	9445295	-1738	INS
3R	7558581	7561299	-2718	INS
3L	9501759	9502182	-423	INS
3L	9526574	9527925	-1351	INS
3L	9527544	9528156	-612	INS
3L	9533805	9541311	-7506	INS
3L	9571955	9572245	-290	INS
3L	9575965	9580989	-5024	INS
3R	13978787	13980900	-2113	INS
3L	9929720	9938446	-8726	INS
3L	10060166	10067690	-7524	INS
3R	14194481	14203575	-9094	INS
3R	8707407	8709794	-2387	INS
3R	8868847	8872608	-3761	INS
3R	8894915	8896018	-1103	INS
3R	8898276	8913803	-15527	INS
3R	9304581	9311814	-7233	INS
3R	9319626	9320004	-378	INS
3R	9361867	9362054	-187	INS
3L	10414995	10417313	-2318	INS
3R	9838164	9849535	-11371	INS
3L	10820548	10820650	-102	INS
3R	15903585	15905738	-2153	INS
2R	25269787	25270112	-325	INS
3L	11196137	11196324	-187	INS
3R	10799819	10799938	-119	INS
3R	10804225	10811704	-7479	INS
3R	21214789	21214893	-104	INS
3L	11329747	11332837	-3090	INS
3L	11499112	11508217	-9105	INS
3L	11512700	11512747	-47	INS
3R	12483193	12487822	-4629	INS
3L	11723137	11727878	-4741	INS
3R	12944650	12944946	-296	INS
3R	19137498	19137531	-33	INS
3L	12874980	12877217	-2237	INS
3L	28102695	28102795	-100	INS
3R	108223	108256	-33	INS
2L	7735283	7741661	-6378	INS
3L	13525207	13532843	-7636	INS
3L	13804600	13822832	-18232	INS
3L	13937736	13938042	-306	INS
3L	14267423	14271809	-4386	INS
3R	17456920	17456976	-56	INS
3R	593468	593616	-148	INS
3L	14468497	14473647	-5150	INS
3R	21735009	21735045	-36	INS
3R	989521	989595	-74	INS
3L	14721236	14723023	-1787	INS
3L	14725649	14728589	-2940	INS
3L	14825177	14832850	-7673	INS
3L	14970812	14971066	-254	INS
3R	18606552	18610729	-4177	INS
3L	15295820	15298592	-2772	INS
2L	1220178	1227453	-7275	INS
2L	7959092	7960447	-1355	INS
3R	19744291	19749482	-5191	INS
3L	15805500	15807615	-2115	INS
2L	7977134	7984054	-6920	INS
3L	15929249	15938341	-9092	INS
3R	20506637	20507384	-747	INS
4	1045338	1045370	-32	INS
3L	16443898	16446183	-2285	INS
3L	16523322	16528462	-5140	INS
2L	11197563	11198218	-655	INS
Un_CP007091v1	5589	5785	-196	INS
3L	16684071	16689238	-5167	INS
Un_CP007101v1	18628	18793	-165	INS
Un_CP007101v1	21429	21636	-207	INS
2L	11215127	11218664	-3537	INS
3R	2640561	2640852	-291	INS
3L	17085057	17094152	-9095	INS
3R	27300639	27300939	-300	INS
3R	22084660	22084693	-33	INS
2L	11215136	11216259	-1123	INS
3R	22297540	22299541	-2001	INS
3R	22450597	22453183	-2586	INS
2L	1006819	1006851	-32	INS
3L	17517032	17524536	-7504	INS
3L	17698322	17698840	-518	INS
3R	28247288	28251979	-4691	INS
3R	22880985	22881067	-82	INS
3L	17834376	17834486	-110	INS
2L	11215127	11217517	-2390	INS
3L	18047760	18056762	-9002	INS
3L	18506185	18509590	-3405	INS
3L	18550220	18550265	-45	INS
3R	25609897	25610444	-547	INS
3L	18772462	18781089	-8627	INS
3L	18833831	18834940	-1109	INS
3L	19008899	19009175	-276	INS
3L	19208111	19209429	-1318	INS
2L	8452476	8461593	-9117	INS
3L	19398953	19402264	-3311	INS
4	13652	20094	-6442	INS
4	13652	28101	-14449	INS
3L	19477300	19477395	-95	INS
3R	27777236	27778234	-998	INS
4	257456	257570	-114	INS
3R	4657849	4657882	-33	INS
4	368736	368813	-77	INS
3L	19820337	19826781	-6444	INS
3L	19848559	19857681	-9122	INS
3L	19861872	19863594	-1722	INS
4	1278622	1278685	-63	INS
3L	20113710	20122913	-9203	INS
Un_CP007081v1	70342	70410	-68	INS
3L	20212657	20218159	-5502	INS
3R	29186266	29186544	-278	INS
3R	29319878	29320141	-263	INS
3L	20476806	20484316	-7510	INS
Un_CP007101v1	16994	17078	-84	INS
Un_CP007101v1	23590	23890	-300	INS
3L	20590117	20590600	-483	INS
3R	29653822	29654514	-692	INS
2L	8723168	8731490	-8322	INS
3R	30238814	30239924	-1110	INS
3L	21151916	21156946	-5030	INS
3L	21243797	21251306	-7509	INS
3R	30396269	30404440	-8171	INS
3R	30480528	30482905	-2377	INS
3L	21365883	21371138	-5255	INS
3L	21498560	21498606	-46	INS
3L	21498888	21500470	-1582	INS
3L	21749373	21754456	-5083	INS
2L	11897147	11900292	-3145	INS
X	8612632	8613228	-596	INS
3R	31981231	31981911	-680	INS
3L	22086038	22086512	-474	INS
3L	22099728	22105859	-6131	INS
4	34609	34766	-157	INS
4	35295	35415	-120	INS
3L	22555822	22563236	-7414	INS
3L	22577671	22582404	-4733	INS
4	475406	476785	-1379	INS
4	536138	536185	-47	INS
3L	22866035	22867111	-1076	INS
X	10361764	10361806	-42	INS
X	3072785	3072816	-31	INS
3L	22989914	22996792	-6878	INS
3L	23062011	23062043	-32	INS
2L	9000333	9007794	-7461	INS
3L	23092592	23093016	-424	INS
4	1008560	1008706	-146	INS
4	1172001	1172212	-211	INS
4	1268695	1268846	-151	INS
4	1280377	1280417	-40	INS
3L	23231039	23231081	-42	INS
3L	23349615	23349709	-94	INS
X	4388294	4388355	-61	INS
Un_CP007085v1	44615	44669	-54	INS
3L	23551111	23551153	-42	INS
Un_CP007120v1	3717	3992	-275	INS
X	5362889	5362944	-55	INS
X	4318699	4319073	-374	INS
3L	23860016	23861283	-1267	INS
3L	23876547	23877017	-470	INS
3L	24127526	24127787	-261	INS
X	7015011	7015048	-37	INS
X	1021161	1021197	-36	INS
3L	24458381	24458557	-176	INS
X	1165276	1165411	-135	INS
3L	24463585	24470821	-7236	INS
3L	24481129	24481240	-111	INS
X	1454533	1454820	-287	INS
X	1540010	1540355	-345	INS
X	1628026	1635440	-7414	INS
2L	9280040	9280079	-39	INS
X	2308844	2317372	-8528	INS
X	2844953	2852309	-7356	INS
X	3178520	3186126	-7606	INS
3L	24831284	24834371	-3087	INS
X	3597604	3619718	-22114	INS
X	3726809	3730124	-3315	INS
X	3785938	3786000	-62	INS
X	9808850	9809207	-357	INS
X	4130131	4130464	-333	INS
X	4157943	4164875	-6932	INS
X	4209979	4210015	-36	INS
X	4284515	4289665	-5150	INS
X	19669909	19670112	-203	INS
3L	25628547	25633198	-4651	INS
X	20144895	20145010	-115	INS
3L	25785291	25790020	-4729	INS
X	4869742	4869776	-34	INS
X	20437412	20437933	-521	INS
2L	1570742	1573560	-2818	INS
2L	12219470	12224934	-5464	INS
3L	26482458	26482873	-415	INS
X	5883861	5884047	-186	INS
X	5927147	5932297	-5150	INS
X	22085864	22085940	-76	INS
3L	26625208	26630132	-4924	INS
X	6335261	6337710	-2449	INS
3L	26697517	26697637	-120	INS
3R	16189465	16189811	-346	INS
X	6477106	6479027	-1921	INS
X	6605532	6608500	-2968	INS
X	6757219	6757272	-53	INS
X	7018590	7018941	-351	INS
X	22765119	22765191	-72	INS
X	22904109	22904267	-158	INS
X	8066626	8066656	-30	INS
X	8612329	8612665	-336	INS
3L	27805883	27806022	-139	INS
3R	107279	107326	-47	INS
X	16253901	16253935	-34	INS
3R	117537	117881	-344	INS
X	9625390	9625740	-350	INS
X	9809599	9809931	-332	INS
X	10101814	10156266	-54452	INS
X	10102562	10102775	-213	INS
X	17234314	17234354	-40	INS
X	10525123	10532126	-7003	INS
X	10899876	10899911	-35	INS
X	11026493	11026714	-221	INS
X	11184300	11189323	-5023	INS
X	11194483	11201850	-7367	INS
X	11240550	11240960	-410	INS
X	11271873	11273316	-1443	INS
2L	1618285	1618561	-276	INS
3R	1691354	1691386	-32	INS
X	11571507	11571691	-184	INS
X	11657955	11657992	-37	INS
X	19124485	19124521	-36	INS
3R	2012315	2012395	-80	INS
3R	2074897	2075315	-418	INS
X	12302010	12303259	-1249	INS
X	20506980	20507208	-228	INS
X	13100646	13100751	-105	INS
2L	12861743	12863155	-1412	INS
2L	13627212	13627537	-325	INS
X	21022299	21022412	-113	INS
X	20164390	20164633	-243	INS
3R	3813867	3814349	-482	INS
2L	9973775	9980839	-7064	INS
3R	4258634	4265975	-7341	INS
X	14815694	14815725	-31	INS
3R	4538934	4540141	-1207	INS
3R	4609594	4610687	-1093	INS
X	21172099	21172321	-222	INS
3R	4657340	4657375	-35	INS
3R	4887531	4894832	-7301	INS
X	22047623	22047667	-44	INS
X	22055868	22055911	-43	INS
X	21474456	21474763	-307	INS
3R	5260085	5260313	-228	INS
X	21625569	21625739	-170	INS
3R	5746067	5746250	-183	INS
3R	5822430	5823541	-1111	INS
3R	5927614	5927798	-184	INS
X	17057988	17058173	-185	INS
X	17058737	17058779	-42	INS
3R	6016014	6024440	-8426	INS
X	21925039	21925300	-261	INS
X	22510418	22510547	-129	INS
3R	6158563	6167092	-8529	INS
X	21965122	21972434	-7312	INS
3R	6175225	6182442	-7217	INS
X	22640135	22640193	-58	INS
3R	6510078	6515104	-5026	INS
3R	6737548	6739270	-1722	INS
X	18194122	18194602	-480	INS
X	19108029	19108065	-36	INS
X	19109162	19109291	-129	INS
3R	7586032	7586361	-329	INS
X	19357024	19358411	-1387	INS
X	19452901	19452936	-35	INS
3R	7652523	7652579	-56	INS
3R	7694629	7713636	-19007	INS
3R	7729520	7737404	-7884	INS
3R	7849695	7850807	-1112	INS
3R	7973361	7974366	-1005	INS
3R	8090593	8094016	-3423	INS
3R	8101810	8104839	-3029	INS
X	20163444	20163940	-496	INS
3R	8403061	8412172	-9111	INS
3R	8570529	8575083	-4554	INS
X	20236612	20236643	-31	INS
3R	8601825	8610925	-9100	INS
2L	1999614	1999716	-102	INS
2L	13599626	13600149	-523	INS
X	23511461	23511566	-105	INS
X	21190590	21190691	-101	INS
3R	9838163	9850489	-12326	INS
X	21474977	21475466	-489	INS
3R	10341666	10348584	-6918	INS
3R	11065640	11071241	-5601	INS
3R	11143224	11143364	-140	INS
2L	1301804	1302288	-484	INS
3R	12022936	12025059	-2123	INS
2L	10862894	10864453	-1559	INS
2L	10876593	10883595	-7002	INS
3R	12864610	12865041	-431	INS
3R	12920206	12925355	-5149	INS
3R	13135878	13137999	-2121	INS
X	22397086	22397292	-206	INS
3R	13143084	13148607	-5523	INS
X	22429088	22429171	-83	INS
3R	13517276	13520039	-2763	INS
X	22726245	22726298	-53	INS
X	22755083	22755116	-33	INS
2L	10947007	10956169	-9162	INS
X	22844580	22844611	-31	INS
3R	14021698	14023461	-1763	INS
X	22847723	22847773	-50	INS
X	22868030	22868089	-59	INS
X	22894440	22895092	-652	INS
X	22941341	22941376	-35	INS
2L	1310897	1311577	-680	INS
2L	1679030	1686441	-7411	INS
3R	14180864	14185576	-4712	INS
3R	14194478	14202789	-8311	INS
3R	14246441	14247882	-1441	INS
3R	15041446	15045142	-3696	INS
3R	15079861	15080045	-184	INS
3R	15102550	15109751	-7201	INS
3R	15132106	15135112	-3006	INS
3R	15162599	15167312	-4713	INS
X	23243062	23243299	-237	INS
3R	15601220	15608689	-7469	INS
3R	15684001	15684275	-274	INS
3R	15735278	15739672	-4394	INS
4	1288422	1288524	-102	INS
X	23362884	23377801	-14917	INS
X	23384335	23384835	-500	INS
2L	11216099	11218070	-1971	INS
X	23399709	23403453	-3744	INS
2L	1711407	1711677	-270	INS
3R	17294722	17295091	-369	INS
3R	17346736	17348245	-1509	INS
X	23421159	23421478	-319	INS
X	23421971	23422219	-248	INS
X	23430249	23430346	-97	INS
X	23430655	23430875	-220	INS
3R	17591340	17591718	-378	INS
3R	17638377	17638797	-420	INS
3R	17763216	17763646	-430	INS
3R	17925905	17927317	-1412	INS
3R	18061637	18063144	-1507	INS
3R	18141271	18141452	-181	INS
3R	18215806	18215920	-114	INS
2L	11315303	11317474	-2171	INS
X_CP007103v1_random	29806	30369	-563	INS
X_CP007103v1_random	31340	31437	-97	INS
3R	19441559	19450661	-9102	INS
2L	11397640	11397696	-56	INS
3R	20156745	20165861	-9116	INS
3L	27011286	27071103	-59817	INS
3R	20854535	20859272	-4737	INS
3R	20901708	20901757	-49	INS
3R	21141727	21150154	-8427	INS
3R	21518062	21518135	-73	INS
3R	22234729	22235994	-1265	INS
3R	22239545	22248550	-9005	INS
2L	11614108	11615516	-1408	INS
3R	22588859	22588980	-121	INS
3R	22881247	22884898	-3651	INS
3R	23515573	23516648	-1075	INS
3R	23558450	23560177	-1727	INS
3R	23835460	23844556	-9096	INS
3R	23851109	23858721	-7612	INS
2L	15683782	15726881	-43099	INS
3R	24072135	24072510	-375	INS
3R	24076963	24078355	-1392	INS
3R	24927180	24931917	-4737	INS
3R	25725883	25734989	-9106	INS
X	11271706	11272371	-665	INS
3R	26108878	26117406	-8528	INS
3R	26215828	26221603	-5775	INS
3R	26349299	26349337	-38	INS
3R	26376380	26385439	-9059	INS
3R	26510557	26519561	-9004	INS
3R	26558380	26565630	-7250	INS
3R	26642784	26643121	-337	INS
3R	26810605	26811035	-430	INS
3R	27007460	27016541	-9081	INS
3R	103594	103671	-77	INS
3R	27521207	27530363	-9156	INS
3R	27777198	27777534	-336	INS
3R	108402	108846	-444	INS
3R	27961423	27964157	-2734	INS
3R	28302156	28302538	-382	INS
3R	28792924	28797965	-5041	INS
3R	29079427	29080742	-1315	INS
3R	29406667	29407899	-1232	INS
3R	29738316	29739728	-1412	INS
3R	29760415	29761558	-1143	INS
3R	30084904	30086314	-1410	INS
3R	30347072	30347103	-31	INS
X	17766410	17766452	-42	INS
3R	30818862	30820373	-1511	INS
3R	31055553	31055612	-59	INS
3R	31330482	31335631	-5149	INS
3R	31413144	31418290	-5146	INS
3R	339753	339786	-33	INS
3R	343041	343078	-37	INS
4	320043	328165	-8122	INS
4	561872	562363	-491	INS
4	581069	581413	-344	INS
4	671657	680185	-8528	INS
X	21623800	21623926	-126	INS
2L	12417837	12418010	-173	INS
Un_CP007081v1	75018	76922	-1904	INS
Un_CP007091v1	4266	4298	-32	INS
Un_CP007120v1	3718	3753	-35	INS
Un_CP007120v1	22940	37547	-14607	INS
X	21976597	21976885	-288	INS
X	79371	79545	-174	INS
X	22258017	22258068	-51	INS
2L	12739224	12743951	-4727	INS
X	551476	558984	-7508	INS
X	564163	564571	-408	INS
X	644394	644906	-512	INS
X	812317	817864	-5547	INS
X	827656	835395	-7739	INS
X	906754	908489	-1735	INS
X	1357832	1367892	-10060	INS
X	1518129	1519243	-1114	INS
X	1518132	1523256	-5124	INS
X	22396632	22396688	-56	INS
X	1567702	1569431	-1729	INS
X	1737164	1746275	-9111	INS
X	1930590	1938107	-7517	INS
X	1954939	1962826	-7887	INS
X	2132094	2133542	-1448	INS
X	2399890	2408187	-8297	INS
X	22704249	22704320	-71	INS
X	2610436	2617499	-7063	INS
X	22704673	22705017	-344	INS
X	2664428	2665526	-1098	INS
X	3058074	3058258	-184	INS
2L	12791658	12795278	-3620	INS
X	3070266	3073343	-3077	INS
3R	728433	728753	-320	INS
X	22955139	22955353	-214	INS
X	3218554	3227649	-9095	INS
3R	748994	749038	-44	INS
X	3493146	3502251	-9105	INS
2L	12894072	12895484	-1412	INS
2L	21271823	21272280	-457	INS
X	3753189	3761130	-7941	INS
X	3986916	3994493	-7577	INS
2L	21290909	21290948	-39	INS
X	4700449	4700731	-282	INS
X	4731870	4736910	-5040	INS
X	4763303	4763736	-433	INS
X	4792427	4792801	-374	INS
X	4828021	4835315	-7294	INS
X	4990096	4997257	-7161	INS
X	5096321	5103828	-7507	INS
X	5338758	5339940	-1182	INS
X	5389812	5392788	-2976	INS
X	23522273	23522400	-127	INS
X	5481108	5485021	-3913	INS
X	5524892	5528700	-3808	INS
X	5727444	5731420	-3976	INS
X	6562870	6571297	-8427	INS
2L	19399658	19400225	-567	INS
X	7480827	7482277	-1450	INS
X	7702955	7703339	-384	INS
X	7784289	7784535	-246	INS
X	7845776	7847208	-1432	INS
2L	13481496	13482048	-552	INS
X	9508189	9509620	-1431	INS
X	9575846	9576104	-258	INS
X	10095193	10101095	-5902	INS
2L	13655811	13665262	-9451	INS
X	10138270	10145720	-7450	INS
X	10267355	10276451	-9096	INS
X	10348853	10356363	-7510	INS
X	10550904	10552301	-1397	INS
X	10919340	10919690	-350	INS
X	11096052	11103099	-7047	INS
X	11561095	11561243	-148	INS
X	11645020	11648253	-3233	INS
X	11662251	11662641	-390	INS
X	11781233	11781740	-507	INS
2L	13853139	13862167	-9028	INS
X	12124926	12125280	-354	INS
X	12229908	12230008	-100	INS
3R	2703229	2703270	-41	INS
X	12381922	12385725	-3803	INS
X	12493958	12494013	-55	INS
X	12646936	12646977	-41	INS
X	12754715	12754864	-149	INS
X	12795050	12797884	-2834	INS
X	13401538	13401833	-295	INS
X	13429514	13430609	-1095	INS
X	14030802	14035335	-4533	INS
2L	2100430	2109528	-9098	INS
X	14105076	14114173	-9097	INS
X	14157642	14163245	-5603	INS
X	14304108	14310012	-5904	INS
X	14416362	14421075	-4713	INS
X	14551697	14559304	-7607	INS
X	14636516	14641880	-5364	INS
X	14778084	14782807	-4723	INS
X	14936913	14946116	-9203	INS
2L	20215119	20218217	-3098	INS
X	15034148	15041611	-7463	INS
X	15421968	15423423	-1455	INS
X	15975622	15975698	-76	INS
2L	19737403	19740820	-3417	INS
2L	2112166	2119772	-7606	INS
X	16222830	16231101	-8271	INS
X	16340715	16349817	-9102	INS
X	16371867	16371983	-116	INS
X	16492699	16498134	-5435	INS
X	16936056	16936420	-364	INS
X	17113797	17119369	-5572	INS
X	17431409	17431694	-285	INS
2L	22336191	22338359	-2168	INS
X	17557003	17557437	-434	INS
X	17793004	17796247	-3243	INS
X	17893645	17896377	-2732	INS
2L	14618967	14619199	-232	INS
X	18363206	18363270	-64	INS
X	18429546	18434802	-5256	INS
X	18784481	18784654	-173	INS
X	18843024	18843088	-64	INS
X	18957122	18965729	-8607	INS
X	19060464	19065191	-4727	INS
X	19136600	19143422	-6822	INS
X	19472178	19472693	-515	INS
X	19668971	19669096	-125	INS
X	19710124	19711854	-1730	INS
X	19797399	19804613	-7214	INS
X	20033368	20036932	-3564	INS
X	20362188	20362471	-283	INS
2L	14803932	14809069	-5137	INS
X	20836784	20844331	-7547	INS
X	20880153	20880194	-41	INS
X	20940773	20942182	-1409	INS
X	20957033	20962419	-5386	INS
X	21061918	21062346	-428	INS
2L	14890006	14890377	-371	INS
2L	21274308	21274349	-41	INS
X	21595633	21598632	-2999	INS
2L	14984436	14991983	-7547	INS
X	21750098	21750157	-59	INS
X	21785693	21785770	-77	INS
2L	21333673	21333763	-90	INS
2L	21346422	21347292	-870	INS
2L	2294095	2299246	-5151	INS
X	21975528	21975689	-161	INS
X	22510960	22511039	-79	INS
X	22522680	22525445	-2765	INS
X	22681531	22688934	-7403	INS
2L	15197120	15197358	-238	INS
X	22812046	22816735	-4689	INS
X	22954653	22954696	-43	INS
X	22957954	22958018	-64	INS
2L	21336963	21337217	-254	INS
X	22987169	22989694	-2525	INS
X	22996361	23003526	-7165	INS
X	23321159	23341857	-20698	INS
2L	23234065	23239474	-5409	INS
X	23384167	23384670	-503	INS
X	23473918	23531877	-57959	INS
2L	21653243	21656493	-3250	INS
2L	21705943	21706697	-754	INS
X_CP007103v1_random	32955	33029	-74	INS
2L	15586463	15593462	-6999	INS
2L	1897022	1901062	-4040	INS
2L	2565592	2571607	-6015	INS
2L	15683783	15727575	-43792	INS
2L	21186815	21187082	-267	INS
2L	21337902	21338312	-410	INS
2L	15839189	15839650	-461	INS
2L	15925256	15925470	-214	INS
2L	22093017	22093081	-64	INS
2L	22088125	22088201	-76	INS
2L	16141215	16146369	-5154	INS
2L	21869127	21869162	-35	INS
2L	22948724	22948842	-118	INS
2L	21999251	21999400	-149	INS
2L	22018193	22018231	-38	INS
4	476744	476797	-53	INS
2L	16702817	16702998	-181	INS
2L	16958155	16962889	-4734	INS
2L	23186981	23187230	-249	INS
2L	17167616	17167800	-184	INS
2L	17168247	17168967	-720	INS
2L	17199211	17200624	-1413	INS
2L	17273249	17277963	-4714	INS
2L	23405171	23405378	-207	INS
2L	17687547	17691892	-4345	INS
2L	2110228	2110300	-72	INS
Un_CP007101v1	19546	20217	-671	INS
2L	17819976	17825125	-5149	INS
Un_CP007101v1	22592	22880	-288	INS
2L	17912010	17914128	-2118	INS
2L	17951997	17953402	-1405	INS
2R	1211588	1216067	-4479	INS
2L	22997721	22998001	-280	INS
2L	23042449	23042561	-112	INS
2L	18408078	18412808	-4730	INS
2L	18424423	18424681	-258	INS
2R	4838922	4840391	-1469	INS
2L	2673045	2673096	-51	INS
2R	1907161	1907234	-73	INS
2L	18633666	18638390	-4724	INS
2L	19051642	19051715	-73	INS
2L	23450882	23451971	-1089	INS
2R	142434	143036	-602	INS
2L	19345070	19357225	-12155	INS
2R	164526	164665	-139	INS
2R	346749	346799	-50	INS
2R	382196	386790	-4594	INS
2L	3162541	3163655	-1114	INS
2L	19620146	19621076	-930	INS
2L	19652622	19674004	-21382	INS
2L	19703592	19712675	-9083	INS
2R	623550	623993	-443	INS
2R	5410368	5410464	-96	INS
2L	19818428	19818584	-156	INS
2R	1377818	1377850	-32	INS
2R	1516658	1521332	-4674	INS
2L	20106329	20106359	-30	INS
2L	3202793	3210168	-7375	INS
2L	20159017	20164271	-5254	INS
2R	2226211	2226242	-31	INS
2L	20176777	20198023	-21246	INS
2R	1323189	1323438	-249	INS
2L	20272167	20282822	-10655	INS
2L	20303213	20310627	-7414	INS
2R	2449313	2457199	-7886	INS
2R	1620089	1621784	-1695	INS
2R	4169784	4169998	-214	INS
2L	20740301	20748056	-7755	INS
2R	4186975	4187267	-292	INS
2R	6526198	6526278	-80	INS
2R	6597926	6597960	-34	INS
2L	20901575	20902361	-786	INS
2R	2087426	2087600	-174	INS
2L	20976697	20981421	-4724	INS
2R	4002701	4003088	-387	INS
2R	2428364	2428399	-35	INS
2R	4169734	4261463	-91729	INS
2R	4249223	4249709	-486	INS
2R	4260549	4260729	-180	INS
2R	4844777	4844813	-36	INS
2R	2704363	2706943	-2580	INS
2R	4412348	4412380	-32	INS
2L	2661249	2663032	-1783	INS
2R	4548320	4548352	-32	INS
2R	4675965	4676016	-51	INS
2L	3649838	3654987	-5149	INS
2R	4679460	4679523	-63	INS
2L	21825201	21825577	-376	INS
2R	4805200	4815007	-9807	INS
2R	4816743	4816801	-58	INS
2L	21981737	21990848	-9111	INS
2R	4831714	4831749	-35	INS
2R	4837100	4837375	-275	INS
2R	5209834	5210312	-478	INS
2R	4969073	4969121	-48	INS
2L	22220535	22220568	-33	INS
2L	22221086	22221154	-68	INS

## Sheet: polarized_DEL
chrom	start	end	length	SV
3L	9820234	9822599	-2365	DEL
3L	2706820	2708473	-1653	DEL
X	18515502	18517115	-1613	DEL
X	3793473	3794861	-1388	DEL
3L	7358345	7359575	-1230	DEL
2R	1084220	1085383	-1163	DEL
3L	20420716	20421849	-1133	DEL
2L	23171113	23172064	-951	DEL
3L	3027651	3028598	-947	DEL
X	15635029	15635961	-932	DEL
X	22378410	22379230	-820	DEL
3L	19933583	19934351	-768	DEL
2R	19062510	19063268	-758	DEL
2L	19900328	19901060	-732	DEL
3R	15942103	15942801	-698	DEL
3R	22348556	22349245	-689	DEL
2R	2341152	2341817	-665	DEL
3L	10548440	10549051	-611	DEL
3R	28283041	28283612	-571	DEL
2L	15947799	15948366	-567	DEL
3L	25618292	25618843	-551	DEL
X	5209361	5209890	-529	DEL
3R	22143496	22144012	-516	DEL
2R	24205827	24206334	-507	DEL
3L	8031898	8032385	-487	DEL
3L	4706125	4706560	-435	DEL
2L	11663131	11663541	-410	DEL
X	23286445	23286849	-404	DEL
2L	19913104	19913496	-392	DEL
2R	10376703	10377082	-379	DEL
2L	764439	764817	-378	DEL
2L	17894491	17894865	-374	DEL
3L	10617334	10617699	-365	DEL
X	10068423	10068784	-361	DEL
3L	8261174	8261533	-359	DEL
2R	8713224	8713582	-358	DEL
X	18427433	18427789	-356	DEL
3L	27982370	27982722	-352	DEL
3R	20703534	20703872	-338	DEL
X	9711047	9711384	-337	DEL
X	10007464	10007801	-337	DEL
3L	22250608	22250939	-331	DEL
3R	8211693	8212023	-330	DEL
X	6517174	6517502	-328	DEL
X	9956315	9956642	-327	DEL
2R	12565618	12565940	-322	DEL
2R	14942069	14942389	-320	DEL
2L	3240658	3240975	-317	DEL
3L	5983919	5984235	-316	DEL
2L	7399356	7399668	-312	DEL
3R	10737622	10737931	-309	DEL
3R	427959	428263	-304	DEL
2R	17872963	17873266	-303	DEL
2R	10781456	10781755	-299	DEL
2L	12859327	12859626	-299	DEL
3R	20564177	20564476	-299	DEL
2R	10376189	10376483	-294	DEL
2L	11889474	11889760	-286	DEL
3R	28352565	28352849	-284	DEL
X	14716896	14717180	-284	DEL
2R	10477214	10477497	-283	DEL
3L	5484817	5485093	-276	DEL
2L	11941494	11941766	-272	DEL
3R	11111604	11111872	-268	DEL
2L	7410589	7410856	-267	DEL
3L	5388255	5388522	-267	DEL
2L	22641083	22641349	-266	DEL
3L	11290682	11290946	-264	DEL
2R	16689211	16689473	-262	DEL
3R	24411142	24411403	-261	DEL
3R	29005078	29005334	-256	DEL
3R	26239879	26240134	-255	DEL
2R	18900766	18901017	-251	DEL
2R	4600530	4600776	-246	DEL
3L	10096238	10096482	-244	DEL
2L	2921347	2921591	-244	DEL
3R	21226014	21226257	-243	DEL
2L	14613486	14613728	-242	DEL
2L	3994509	3994750	-241	DEL
2L	11933690	11933923	-233	DEL
X	5368669	5368899	-230	DEL
3R	20828408	20828637	-229	DEL
2L	20863106	20863328	-222	DEL
3L	6915865	6916083	-218	DEL
X	23284966	23285184	-218	DEL
3R	12782263	12782477	-214	DEL
Un_CP007101v1	20470	20470	-211	DEL
2R	2342279	2342486	-207	DEL
2R	10130573	10130777	-204	DEL
2L	10458157	10458361	-204	DEL
2L	15891708	15891911	-203	DEL
2L	15967597	15967799	-202	DEL
2L	4045276	4045476	-200	DEL
X	6895901	6896101	-200	DEL
3R	24094900	24095096	-196	DEL
X	5487561	5487757	-196	DEL
X	3198682	3198877	-195	DEL
3R	21108102	21108295	-193	DEL
X	13632231	13632424	-193	DEL
3L	958915	959106	-191	DEL
X	7994908	7995099	-191	DEL
3L	12611050	12611238	-188	DEL
3R	8400193	8400378	-185	DEL
3R	12735216	12735399	-183	DEL
X	15349724	15349907	-183	DEL
2L	17793842	17794025	-183	DEL
2L	4155660	4155842	-182	DEL
2R	19929292	19929473	-181	DEL
3R	20847829	20848009	-180	DEL
3L	2355806	2355983	-177	DEL
X	9931686	9931863	-177	DEL
2L	12658493	12658670	-177	DEL
3L	6701860	6702036	-176	DEL
3L	10928214	10928389	-175	DEL
2R	21251872	21252044	-172	DEL
2L	15863253	15863425	-172	DEL
X	4697100	4697269	-169	DEL
3R	17120553	17120722	-169	DEL
3L	11135563	11135731	-168	DEL
2L	11444167	11444333	-166	DEL
2L	10607714	10607878	-164	DEL
3L	12392803	12392965	-162	DEL
2L	21423856	21424015	-159	DEL
3R	15127709	15127865	-156	DEL
X	8362063	8362219	-156	DEL
2L	12790353	12790509	-156	DEL
3L	4000520	4000675	-155	DEL
3R	6958974	6959129	-155	DEL
2L	7241411	7241564	-153	DEL
3L	21057186	21057339	-153	DEL
X	22693976	22694126	-150	DEL
2R	19044847	19044993	-146	DEL
2L	16458878	16459019	-141	DEL
3R	17121575	17121714	-139	DEL
2L	3197288	3197424	-136	DEL
3R	19533049	19533184	-135	DEL
2L	19407777	19407911	-134	DEL
3R	8049418	8049551	-133	DEL
3R	15702915	15703048	-133	DEL
2R	15407577	15407706	-129	DEL
3R	31437664	31437793	-129	DEL
X	22373147	22373275	-128	DEL
2R	22265920	22266047	-127	DEL
3L	2355494	2355621	-127	DEL
3R	20434891	20435017	-126	DEL
X	18042710	18042836	-126	DEL
2L	4791971	4792094	-123	DEL
3R	15559077	15559200	-123	DEL
3L	11896938	11897059	-121	DEL
3R	18932606	18932727	-121	DEL
3L	3938292	3938412	-120	DEL
2L	21974564	21974683	-119	DEL
2R	25209072	25209190	-118	DEL
3R	24177257	24177375	-118	DEL
2L	2907434	2907552	-118	DEL
2R	16837974	16838091	-117	DEL
2R	21232698	21232815	-117	DEL
3L	13379739	13379855	-116	DEL
X	20915097	20915212	-115	DEL
X	20974240	20974355	-115	DEL
3L	15478182	15478296	-114	DEL
2R	23656151	23656263	-112	DEL
X	19881024	19881135	-111	DEL
X	3036759	3036869	-110	DEL
3R	2063521	2063631	-110	DEL
2L	13752747	13752857	-110	DEL
2L	6285949	6286058	-109	DEL
3L	15743014	15743120	-106	DEL
3R	9924232	9924338	-106	DEL
3R	30973187	30973293	-106	DEL
3L	10195711	10195816	-105	DEL
3R	19847013	19847118	-105	DEL
3L	5393496	5393600	-104	DEL
3L	16419531	16419634	-103	DEL
3R	20278643	20278746	-103	DEL
3R	21379532	21379630	-98	DEL
2L	15476456	15476554	-98	DEL
2L	19550315	19550411	-96	DEL
2R	19096555	19096650	-95	DEL
3R	21041151	21041246	-95	DEL
2L	19786388	19786483	-95	DEL
2L	4360098	4360192	-94	DEL
2L	11709911	11710005	-94	DEL
2L	6887551	6887644	-93	DEL
3R	29673256	29673349	-93	DEL
2R	6786455	6786546	-91	DEL
X	22042879	22042969	-90	DEL
2L	20169772	20169862	-90	DEL
2R	14987435	14987524	-89	DEL
3R	24790034	24790123	-89	DEL
X	11379814	11379903	-89	DEL
3L	3057302	3057390	-88	DEL
3R	18559537	18559625	-88	DEL
2L	16697127	16697215	-88	DEL
3L	22130549	22130636	-87	DEL
3R	31774928	31775014	-86	DEL
3L	1280298	1280382	-84	DEL
3L	23316986	23317069	-83	DEL
2L	12948887	12948970	-83	DEL
3L	9807058	9807140	-82	DEL
2L	18294299	18294381	-82	DEL
2L	2625717	2625799	-82	DEL
2R	20127247	20127328	-81	DEL
2L	16058174	16058255	-81	DEL
X	7570688	7570768	-80	DEL
X	16762631	16762711	-80	DEL
3R	321243	321322	-79	DEL
2R	14348239	14348317	-78	DEL
3L	13074090	13074168	-78	DEL
3L	18325745	18325823	-78	DEL
3R	6717736	6717814	-78	DEL
3L	12614628	12614706	-78	DEL
2L	16527100	16527178	-78	DEL
3R	21049235	21049312	-77	DEL
3L	17462067	17462144	-77	DEL
2L	6530376	6530452	-76	DEL
3L	28086240	28086316	-76	DEL
3R	14014334	14014410	-76	DEL
3R	22808948	22809024	-76	DEL
3R	22867489	22867565	-76	DEL
3R	27033417	27033493	-76	DEL
2L	18945631	18945707	-76	DEL
3R	13790251	13790326	-75	DEL
3L	16673656	16673731	-75	DEL
X	11922406	11922481	-75	DEL
3L	14938408	14938482	-74	DEL
3R	5506896	5506969	-73	DEL
3R	12666820	12666893	-73	DEL
3L	13314041	13314113	-72	DEL
3L	665591	665663	-72	DEL
3R	21373998	21374070	-72	DEL
3R	31501371	31501443	-72	DEL
X	17089651	17089723	-72	DEL
3R	20722904	20722976	-72	DEL
2L	7740390	7740461	-71	DEL
2R	23467622	23467692	-70	DEL
3R	9382869	9382939	-70	DEL
2R	16119941	16120010	-69	DEL
3R	319771	319840	-69	DEL
3R	18628921	18628990	-69	DEL
X	12532709	12532778	-69	DEL
X	16050560	16050629	-69	DEL
3R	499559	499627	-68	DEL
2L	11644573	11644641	-68	DEL
2R	5744348	5744415	-67	DEL
2R	6895970	6896037	-67	DEL
2R	18752612	18752679	-67	DEL
3L	2795778	2795845	-67	DEL
2L	20413154	20413221	-67	DEL
2L	15217133	15217200	-67	DEL
2R	5861341	5861407	-66	DEL
2R	22778018	22778084	-66	DEL
2R	6539878	6539944	-66	DEL
3L	18696009	18696075	-66	DEL
2L	18355930	18355996	-66	DEL
2L	20643360	20643426	-66	DEL
2L	3712193	3712259	-66	DEL
3R	24473626	24473691	-65	DEL
3R	26682665	26682730	-65	DEL
3R	27038615	27038680	-65	DEL
2L	16407473	16407538	-65	DEL
2R	9026885	9026949	-64	DEL
3L	9688919	9688983	-64	DEL
3R	10211232	10211296	-64	DEL
3R	11220332	11220396	-64	DEL
3R	11734214	11734278	-64	DEL
3R	8310105	8310168	-63	DEL
3R	29508898	29508961	-63	DEL
X	18698898	18698961	-63	DEL
2L	3201052	3201115	-63	DEL
2L	7125845	7125907	-62	DEL
3L	18106306	18106368	-62	DEL
2R	19010794	19010856	-62	DEL
2L	14369179	14369241	-62	DEL
X	19880432	19880494	-62	DEL
2R	19539793	19539854	-61	DEL
3L	3243173	3243234	-61	DEL
2R	9975968	9976029	-61	DEL
3L	7002040	7002101	-61	DEL
X	10817394	10817455	-61	DEL
2R	20502339	20502399	-60	DEL
2R	15700292	15700352	-60	DEL
3L	20739547	20739607	-60	DEL
3L	2426717	2426777	-60	DEL
2L	10891536	10891596	-60	DEL
3R	23733181	23733241	-60	DEL
X	18218087	18218147	-60	DEL
2R	12094004	12094063	-59	DEL
2R	10621293	10621352	-59	DEL
2R	19774062	19774121	-59	DEL
X	4047523	4047582	-59	DEL
X	15017988	15018047	-59	DEL
X	18256515	18256574	-59	DEL
3L	14729567	14729625	-58	DEL
3R	324788	324846	-58	DEL
3R	19840669	19840727	-58	DEL
3R	28091472	28091530	-58	DEL
2L	18250606	18250664	-58	DEL
2R	7832024	7832081	-57	DEL
3L	12019377	12019434	-57	DEL
3R	12245706	12245763	-57	DEL
3R	14096205	14096262	-57	DEL
3R	20487989	20488046	-57	DEL
X	22444037	22444094	-57	DEL
2L	3575477	3575534	-57	DEL
2R	13089803	13089859	-56	DEL
2R	20523091	20523147	-56	DEL
3L	18152787	18152843	-56	DEL
3L	18092828	18092884	-56	DEL
3L	18941229	18941285	-56	DEL
3R	15399632	15399688	-56	DEL
X	13061405	13061461	-56	DEL
X	16529462	16529518	-56	DEL
X	20884659	20884715	-56	DEL
2L	15750046	15750102	-56	DEL
3L	10191338	10191393	-55	DEL
3R	10073823	10073878	-55	DEL
3L	12870002	12870057	-55	DEL
3L	16303826	16303881	-55	DEL
X	21602910	21602965	-55	DEL
2L	19174780	19174835	-55	DEL
2R	11916212	11916266	-54	DEL
2L	9391637	9391691	-54	DEL
3L	12249654	12249708	-54	DEL
2L	7984909	7984963	-54	DEL
3R	7147127	7147181	-54	DEL
2L	12653849	12653903	-54	DEL
3R	10427474	10427528	-54	DEL
3R	25689182	25689236	-54	DEL
2L	18185052	18185106	-54	DEL
2L	15013201	15013255	-54	DEL
2L	3844401	3844454	-53	DEL
3R	21393512	21393565	-53	DEL
3R	20432715	20432768	-53	DEL
2L	20043803	20043856	-53	DEL
2R	13726327	13726379	-52	DEL
3L	14394831	14394883	-52	DEL
3L	21010423	21010475	-52	DEL
3L	20096306	20096358	-52	DEL
3R	6421051	6421103	-52	DEL
X	616650	616702	-52	DEL
2R	7353439	7353490	-51	DEL
2R	12815303	12815354	-51	DEL
3L	22116215	22116266	-51	DEL
3R	8500873	8500924	-51	DEL
3R	19735762	19735813	-51	DEL
3R	21985281	21985332	-51	DEL
3R	26284279	26284330	-51	DEL
X	4815054	4815105	-51	DEL
X	677467	677518	-51	DEL
X	4887099	4887150	-51	DEL
3L	4195191	4195241	-50	DEL
3R	8631563	8631613	-50	DEL
3R	17472367	17472417	-50	DEL
2L	1156915	1156965	-50	DEL
X	9042042	9042092	-50	DEL
2L	17795364	17795414	-50	DEL
2L	2620673	2620723	-50	DEL
2L	73838	73887	-49	DEL
2L	6050492	6050541	-49	DEL
3R	7396412	7396461	-49	DEL
3L	6573198	6573247	-49	DEL
3L	8149817	8149866	-49	DEL
2L	7770656	7770705	-49	DEL
X	11804709	11804758	-49	DEL
3R	12097297	12097346	-49	DEL
2R	13376677	13376725	-48	DEL
3L	852617	852665	-48	DEL
2R	14826452	14826500	-48	DEL
2L	9455028	9455076	-48	DEL
3L	16181986	16182034	-48	DEL
3R	31858225	31858273	-48	DEL
3R	25528093	25528141	-48	DEL
3R	27101590	27101638	-48	DEL
X	17352641	17352689	-48	DEL
2R	5852087	5852134	-47	DEL
2L	590672	590719	-47	DEL
2R	18289480	18289527	-47	DEL
3L	933962	934009	-47	DEL
3L	2719591	2719638	-47	DEL
2L	10281714	10281761	-47	DEL
X	7074282	7074329	-47	DEL
X	11945102	11945149	-47	DEL
X	18148691	18148738	-47	DEL
2L	16408176	16408223	-47	DEL
2R	22620880	22620926	-46	DEL
3L	4839154	4839200	-46	DEL
3L	18020617	18020663	-46	DEL
3L	10721447	10721493	-46	DEL
3L	12352177	12352223	-46	DEL
2R	21352602	21352648	-46	DEL
3L	6974543	6974589	-46	DEL
3L	11943540	11943586	-46	DEL
2L	14621425	14621471	-46	DEL
3R	18485463	18485509	-46	DEL
3R	22157568	22157614	-46	DEL
3R	27871107	27871153	-46	DEL
2L	18110137	18110183	-46	DEL
2L	20320096	20320142	-46	DEL
2R	22185726	22185771	-45	DEL
2R	5653410	5653455	-45	DEL
3L	22034657	22034702	-45	DEL
3L	14522151	14522196	-45	DEL
2L	5475201	5475246	-45	DEL
3L	20183459	20183504	-45	DEL
3R	7103981	7104026	-45	DEL
3R	4194188	4194233	-45	DEL
X	20934899	20934944	-45	DEL
X	2069422	2069467	-45	DEL
2L	4001723	4001767	-44	DEL
3L	1519127	1519171	-44	DEL
3L	2738089	2738133	-44	DEL
3L	10255428	10255472	-44	DEL
2R	15404169	15404213	-44	DEL
3L	17762923	17762967	-44	DEL
2L	8629049	8629093	-44	DEL
2L	10171217	10171261	-44	DEL
3L	20858124	20858168	-44	DEL
2L	12846926	12846970	-44	DEL
X	11936620	11936664	-44	DEL
X	20791607	20791651	-44	DEL
3R	5769284	5769328	-44	DEL
X	16581483	16581527	-44	DEL
X	11297757	11297801	-44	DEL
3L	10917100	10917143	-43	DEL
3L	13766960	13767003	-43	DEL
3R	10671589	10671632	-43	DEL
2L	10117368	10117411	-43	DEL
3R	21784912	21784955	-43	DEL
3R	21295373	21295416	-43	DEL
3L	16861078	16861121	-43	DEL
3R	28201875	28201918	-43	DEL
2L	17784700	17784743	-43	DEL
2L	20042091	20042134	-43	DEL
2L	20862616	20862659	-43	DEL
2R	10388024	10388066	-42	DEL
2R	14796381	14796423	-42	DEL
2R	15196146	15196188	-42	DEL
2R	15898932	15898974	-42	DEL
2L	8108966	8109008	-42	DEL
2L	12396083	12396125	-42	DEL
3R	10780245	10780287	-42	DEL
3L	11757961	11758003	-42	DEL
3R	28594270	28594312	-42	DEL
2L	12171401	12171443	-42	DEL
2L	11841398	11841440	-42	DEL
3R	28019611	28019653	-42	DEL
2L	2311112	2311154	-42	DEL
2R	13764563	13764604	-41	DEL
2R	15645728	15645769	-41	DEL
2R	18398212	18398253	-41	DEL
2L	6104372	6104413	-41	DEL
3L	705952	705993	-41	DEL
2R	10255997	10256038	-41	DEL
3L	7007415	7007456	-41	DEL
2L	6640959	6641000	-41	DEL
3L	9094374	9094415	-41	DEL
3R	7126555	7126596	-41	DEL
3L	9918933	9918974	-41	DEL
3L	13178344	13178385	-41	DEL
3R	5942525	5942566	-41	DEL
3R	31069696	31069737	-41	DEL
X	5444818	5444859	-41	DEL
X	12375537	12375578	-41	DEL
X	14484909	14484950	-41	DEL
2L	21246562	21246603	-41	DEL
2L	5121025	5121065	-40	DEL
2L	5886642	5886682	-40	DEL
2R	23819195	23819235	-40	DEL
2R	12700866	12700906	-40	DEL
3L	18933680	18933720	-40	DEL
2R	22453255	22453295	-40	DEL
3L	5516461	5516501	-40	DEL
3R	11325388	11325428	-40	DEL
2L	9270790	9270830	-40	DEL
3R	9534779	9534819	-40	DEL
2L	9451088	9451128	-40	DEL
3R	17725115	17725155	-40	DEL
3R	13196003	13196043	-40	DEL
2L	10704969	10705009	-40	DEL
3R	16424844	16424884	-40	DEL
3R	31670657	31670697	-40	DEL
X	2397953	2397993	-40	DEL
X	18257079	18257119	-40	DEL
2L	10563965	10564005	-40	DEL
3R	13061932	13061972	-40	DEL
2L	18848244	18848284	-40	DEL
2R	6825488	6825527	-39	DEL
3L	8721254	8721293	-39	DEL
3L	12186423	12186462	-39	DEL
3L	19039979	19040018	-39	DEL
2R	22952975	22953014	-39	DEL
2L	11443229	11443268	-39	DEL
2L	9259267	9259306	-39	DEL
3R	8314943	8314982	-39	DEL
3R	18352626	18352665	-39	DEL
2L	7575320	7575359	-39	DEL
3R	22259971	22260010	-39	DEL
3R	17612553	17612592	-39	DEL
2L	10758424	10758463	-39	DEL
3L	17367483	17367522	-39	DEL
3R	20767553	20767592	-39	DEL
X	14064193	14064232	-39	DEL
3R	24069600	24069639	-39	DEL
2L	15510988	15511027	-39	DEL
3R	18472321	18472360	-39	DEL
3R	21343878	21343917	-39	DEL
3R	21790636	21790675	-39	DEL
2L	19697189	19697228	-39	DEL
2L	16572260	16572299	-39	DEL
2L	16654755	16654794	-39	DEL
2L	17573305	17573344	-39	DEL
2L	17565178	17565217	-39	DEL
2L	6463608	6463646	-38	DEL
2R	14855089	14855127	-38	DEL
2R	18930506	18930544	-38	DEL
3L	9697821	9697859	-38	DEL
3L	7744757	7744795	-38	DEL
3L	16836367	16836405	-38	DEL
2L	7775685	7775723	-38	DEL
3R	11664844	11664882	-38	DEL
3L	11708719	11708757	-38	DEL
3R	30850291	30850329	-38	DEL
3R	21695191	21695229	-38	DEL
3L	17884745	17884783	-38	DEL
2L	11886510	11886548	-38	DEL
X	8421513	8421551	-38	DEL
2L	14017817	14017855	-38	DEL
3R	14608497	14608535	-38	DEL
3R	17840413	17840451	-38	DEL
3R	27644021	27644059	-38	DEL
3R	29472061	29472099	-38	DEL
X	16539149	16539187	-38	DEL
2R	1146942	1146980	-38	DEL
2L	3261531	3261569	-38	DEL
2R	10270223	10270260	-37	DEL
2R	14930880	14930917	-37	DEL
2R	15656087	15656124	-37	DEL
2R	17710033	17710070	-37	DEL
2R	17852977	17853014	-37	DEL
2R	22368652	22368689	-37	DEL
3L	8861576	8861613	-37	DEL
2R	25124509	25124546	-37	DEL
2R	20577138	20577175	-37	DEL
3L	642522	642559	-37	DEL
3L	4472689	4472726	-37	DEL
3L	10651005	10651042	-37	DEL
3L	19518872	19518909	-37	DEL
2R	19583127	19583164	-37	DEL
3L	21852305	21852342	-37	DEL
3L	19086656	19086693	-37	DEL
2L	10631298	10631335	-37	DEL
2L	8032663	8032700	-37	DEL
3R	23540831	23540868	-37	DEL
2L	13948771	13948808	-37	DEL
3R	29773928	29773965	-37	DEL
3R	26241300	26241337	-37	DEL
3L	22447250	22447287	-37	DEL
X	9923443	9923480	-37	DEL
X	13943322	13943359	-37	DEL
3R	11518866	11518903	-37	DEL
4	1289756	1289793	-37	DEL
3R	20498574	20498611	-37	DEL
3R	20787490	20787527	-37	DEL
X	2577650	2577687	-37	DEL
X	23286119	23286156	-37	DEL
2L	19608633	19608670	-37	DEL
2R	6236793	6236829	-36	DEL
2R	8976250	8976286	-36	DEL
2R	15794920	15794956	-36	DEL
3L	8012668	8012704	-36	DEL
3L	4858356	4858392	-36	DEL
3L	20148336	20148372	-36	DEL
3L	4748756	4748792	-36	DEL
3R	13901109	13901145	-36	DEL
3R	8191513	8191549	-36	DEL
3R	20175426	20175462	-36	DEL
3R	17653134	17653170	-36	DEL
3R	30823434	30823470	-36	DEL
3R	26325729	26325765	-36	DEL
2L	1322075	1322111	-36	DEL
X	10211147	10211183	-36	DEL
2L	16375446	16375482	-36	DEL
X	13109397	13109433	-36	DEL
X	15924622	15924658	-36	DEL
3R	7621583	7621619	-36	DEL
2L	13988323	13988359	-36	DEL
3R	17166238	17166274	-36	DEL
2L	19338054	19338090	-36	DEL
2L	19270950	19270986	-36	DEL
2L	21836444	21836480	-36	DEL
2R	6897514	6897550	-36	DEL
2L	21074971	21075007	-36	DEL
2R	7897172	7897207	-35	DEL
2R	8155632	8155667	-35	DEL
2R	8208981	8209016	-35	DEL
2R	18800853	18800888	-35	DEL
2R	13986932	13986967	-35	DEL
2R	16208280	16208315	-35	DEL
2R	23356328	23356363	-35	DEL
3L	10928952	10928987	-35	DEL
2R	14928728	14928763	-35	DEL
2L	7041659	7041694	-35	DEL
3L	17791701	17791736	-35	DEL
3L	18004245	18004280	-35	DEL
2R	20008232	20008267	-35	DEL
2L	5666076	5666111	-35	DEL
3R	6773604	6773639	-35	DEL
3R	9104524	9104559	-35	DEL
3R	9141213	9141248	-35	DEL
3R	5840874	5840909	-35	DEL
3R	19490490	19490525	-35	DEL
3L	12013960	12013995	-35	DEL
3R	22305140	22305175	-35	DEL
3R	21180048	21180083	-35	DEL
3R	21461047	21461082	-35	DEL
3R	28223802	28223837	-35	DEL
3R	23189825	23189860	-35	DEL
3L	18301401	18301436	-35	DEL
X	10552916	10552951	-35	DEL
3R	14089580	14089615	-35	DEL
X	8195056	8195091	-35	DEL
X	15959591	15959626	-35	DEL
X	9283360	9283395	-35	DEL
2L	1662058	1662093	-35	DEL
3R	11242305	11242340	-35	DEL
3R	17895396	17895431	-35	DEL
2L	15906234	15906269	-35	DEL
X	18486160	18486195	-35	DEL
2L	20046607	20046642	-35	DEL
X	20271550	20271585	-35	DEL
2L	16585838	16585873	-35	DEL
2R	10509643	10509677	-34	DEL
2R	17898790	17898824	-34	DEL
2R	20707402	20707436	-34	DEL
2R	21867057	21867091	-34	DEL
2R	24430969	24431003	-34	DEL
2R	22134256	22134290	-34	DEL
3L	1109686	1109720	-34	DEL
2R	7459332	7459366	-34	DEL
2R	10790195	10790229	-34	DEL
3L	13241233	13241267	-34	DEL
3L	14061719	14061753	-34	DEL
3L	14467177	14467211	-34	DEL
2L	7581518	7581552	-34	DEL
3L	4824883	4824917	-34	DEL
3R	6080205	6080239	-34	DEL
3R	16845207	16845241	-34	DEL
3R	8885307	8885341	-34	DEL
3R	15924978	15925012	-34	DEL
3L	13230202	13230236	-34	DEL
3R	21854054	21854088	-34	DEL
3L	15754557	15754591	-34	DEL
3L	16540106	16540140	-34	DEL
3R	21984740	21984774	-34	DEL
3R	21997066	21997100	-34	DEL
3R	29013014	29013048	-34	DEL
X	7960931	7960965	-34	DEL
X	10338583	10338617	-34	DEL
X	17372279	17372313	-34	DEL
X	21077651	21077685	-34	DEL
2L	14773454	14773488	-34	DEL
2L	15138824	15138858	-34	DEL
3R	20553516	20553550	-34	DEL
2L	16001515	16001549	-34	DEL
2L	15945998	15946032	-34	DEL
2L	11681834	11681868	-34	DEL
2L	19773214	19773248	-34	DEL
2L	361613	361647	-34	DEL
2L	20344153	20344187	-34	DEL
2L	13720291	13720325	-34	DEL
2L	14222352	14222386	-34	DEL
2L	361963	361997	-34	DEL
X	17911902	17911936	-34	DEL
X	19460048	19460082	-34	DEL
2L	20695849	20695883	-34	DEL
2L	21819381	21819415	-34	DEL
2R	18926550	18926583	-33	DEL
2L	4265715	4265748	-33	DEL
3L	1373092	1373125	-33	DEL
2R	21217375	21217408	-33	DEL
3L	7422938	7422971	-33	DEL
2R	21469995	21470028	-33	DEL
2R	21818929	21818962	-33	DEL
2R	22035596	22035629	-33	DEL
3L	651441	651474	-33	DEL
2R	24859892	24859925	-33	DEL
3L	10246129	10246162	-33	DEL
3L	9513494	9513527	-33	DEL
3L	13130352	13130385	-33	DEL
2R	19384999	19385032	-33	DEL
3R	13850372	13850405	-33	DEL
3L	10032590	10032623	-33	DEL
3R	11672380	11672413	-33	DEL
2L	10180627	10180660	-33	DEL
3R	24447776	24447809	-33	DEL
3R	25607516	25607549	-33	DEL
3R	21464449	21464482	-33	DEL
3R	21532882	21532915	-33	DEL
2L	13918865	13918898	-33	DEL
3R	27221288	27221321	-33	DEL
3R	24523945	24523978	-33	DEL
3R	24842156	24842189	-33	DEL
3R	30821441	30821474	-33	DEL
X	9786223	9786256	-33	DEL
X	10732999	10733032	-33	DEL
X	11431645	11431678	-33	DEL
X	20090128	20090161	-33	DEL
2L	13111051	13111084	-33	DEL
X	19131883	19131916	-33	DEL
3R	8273786	8273819	-33	DEL
3R	17498013	17498046	-33	DEL
3R	18681872	18681905	-33	DEL
3R	20077091	20077124	-33	DEL
2L	16105319	16105352	-33	DEL
2L	17050068	17050101	-33	DEL
3R	29474481	29474514	-33	DEL
2L	17829963	17829996	-33	DEL
X	6629838	6629871	-33	DEL
2L	23196909	23196942	-33	DEL
2L	3891945	3891977	-32	DEL
2R	8690005	8690037	-32	DEL
2R	9509475	9509507	-32	DEL
2R	18660377	18660409	-32	DEL
2R	18778626	18778658	-32	DEL
2R	18871698	18871730	-32	DEL
2R	19699955	19699987	-32	DEL
3L	6231381	6231413	-32	DEL
2R	22143882	22143914	-32	DEL
2R	23800569	23800601	-32	DEL
2R	23875875	23875907	-32	DEL
2R	22374656	22374688	-32	DEL
3L	15811601	15811633	-32	DEL
3L	11018600	11018632	-32	DEL
3L	15946555	15946587	-32	DEL
2R	19128540	19128572	-32	DEL
2R	23184316	23184348	-32	DEL
2R	24630781	24630813	-32	DEL
2R	24687688	24687720	-32	DEL
3R	7096020	7096052	-32	DEL
3R	12886974	12887006	-32	DEL
3R	6059631	6059663	-32	DEL
3R	6420108	6420140	-32	DEL
3R	7257724	7257756	-32	DEL
3L	10314176	10314208	-32	DEL
3R	17825957	17825989	-32	DEL
3R	20258709	20258741	-32	DEL
3R	20850137	20850169	-32	DEL
3L	14141431	14141463	-32	DEL
2L	13351870	13351902	-32	DEL
2L	10294727	10294759	-32	DEL
3R	23198002	23198034	-32	DEL
3R	23307877	23307909	-32	DEL
2L	7986942	7986974	-32	DEL
3R	31042155	31042187	-32	DEL
3R	28407757	28407789	-32	DEL
3R	30225733	30225765	-32	DEL
3R	31350906	31350938	-32	DEL
3L	21836780	21836812	-32	DEL
4	694954	694986	-32	DEL
X	13968396	13968428	-32	DEL
X	14591656	14591688	-32	DEL
X	15127321	15127353	-32	DEL
2L	1436676	1436708	-32	DEL
X	3862868	3862900	-32	DEL
X	6080885	6080917	-32	DEL
X	9758103	9758135	-32	DEL
X	11044600	11044632	-32	DEL
X	15939323	15939355	-32	DEL
2L	15099970	15100002	-32	DEL
2L	15730928	15730960	-32	DEL
3R	20546028	20546060	-32	DEL
3R	24359655	24359687	-32	DEL
3R	25720852	25720884	-32	DEL
2L	19964885	19964917	-32	DEL
2L	18439129	18439161	-32	DEL
X	13329375	13329407	-32	DEL
X	15277688	15277720	-32	DEL
X	21465065	21465097	-32	DEL
2L	20041482	20041514	-32	DEL
2R	6699643	6699675	-32	DEL
2L	3688349	3688380	-31	DEL
2R	8044601	8044632	-31	DEL
2R	10171164	10171195	-31	DEL
2R	10190494	10190525	-31	DEL
2R	15472084	15472115	-31	DEL
3L	1536910	1536941	-31	DEL
2R	10871697	10871728	-31	DEL
2R	18949361	18949392	-31	DEL
2R	22072733	22072764	-31	DEL
2R	17397857	17397888	-31	DEL
3L	578813	578844	-31	DEL
3L	1726451	1726482	-31	DEL
2R	9325564	9325595	-31	DEL
3L	10852059	10852090	-31	DEL
2R	15679160	15679191	-31	DEL
3L	15871636	15871667	-31	DEL
3L	16610738	16610769	-31	DEL
2R	19701565	19701596	-31	DEL
3L	18582267	18582298	-31	DEL
2R	20506984	20507015	-31	DEL
3L	18797360	18797391	-31	DEL
3L	14214889	14214920	-31	DEL
2R	22864996	22865027	-31	DEL
3L	21799990	21800021	-31	DEL
2L	1019497	1019528	-31	DEL
3L	3593942	3593973	-31	DEL
3L	5351156	5351187	-31	DEL
3L	10762883	10762914	-31	DEL
2L	12802423	12802454	-31	DEL
3R	11263549	11263580	-31	DEL
3R	17419438	17419469	-31	DEL
3R	20029488	20029519	-31	DEL
3R	14995753	14995784	-31	DEL
2L	7733077	7733108	-31	DEL
3R	26370382	26370413	-31	DEL
3R	21952188	21952219	-31	DEL
3R	28702982	28703013	-31	DEL
3R	23820687	23820718	-31	DEL
3R	29831863	29831894	-31	DEL
3R	30690212	30690243	-31	DEL
3L	21813802	21813833	-31	DEL
X	12202822	12202853	-31	DEL
X	6232705	6232736	-31	DEL
2L	12227339	12227370	-31	DEL
X	8092341	8092372	-31	DEL
3R	2326102	2326133	-31	DEL
3R	20766149	20766180	-31	DEL
3R	12819079	12819110	-31	DEL
3R	13765303	13765334	-31	DEL
3R	16253590	16253621	-31	DEL
3R	19908322	19908353	-31	DEL
3R	22310053	22310084	-31	DEL
2L	19833196	19833227	-31	DEL
X	13876009	13876040	-31	DEL
2L	19794064	19794095	-31	DEL
X	18175498	18175529	-31	DEL
X	21419262	21419293	-31	DEL
2L	20674882	20674913	-31	DEL
2L	3232093	3232124	-31	DEL
2L	4136441	4136472	-31	DEL
2L	21119336	21119367	-31	DEL
2R	8419413	8419443	-30	DEL
3L	3797292	3797322	-30	DEL
2L	7739218	7739248	-30	DEL
2L	8003081	8003111	-30	DEL
X	16265896	16265926	-30	DEL
X	13935548	13935578	-30	DEL
2L	14565921	14565951	-30	DEL
3L	16858294	16858294	30	DEL
2R	1323569	1323569	31	DEL
2R	2900475	2900475	31	DEL
2R	6467140	6467140	31	DEL
3R	3906862	3906862	31	DEL
2L	1537389	1537389	31	DEL
X	11051273	11051273	31	DEL
X_CP007103v1_random	25521	25521	31	DEL
2R	1567824	1567824	31	DEL
3R	17077988	17077988	32	DEL
X	19276125	19276125	32	DEL
3R	20658358	20658358	32	DEL
3R	21646912	21646912	32	DEL
3R	5808384	5808384	32	DEL
2R	20835033	20835033	32	DEL
2L	23375432	23375432	32	DEL
2R	4409565	4409565	32	DEL
2R	12402458	12402458	32	DEL
3L	25307281	25307281	32	DEL
3L	23256584	23256584	32	DEL
3L	24806188	24806188	32	DEL
3L	25189647	25189647	32	DEL
X	826151	826151	32	DEL
Un_CP007120v1	58578	58578	32	DEL
X	2460700	2460700	32	DEL
X	15662336	15662336	32	DEL
X	18751902	18751902	32	DEL
X	22718609	22718609	32	DEL
X	22478872	22478872	32	DEL
2L	23047076	23047076	32	DEL
2L	23230689	23230689	32	DEL
2R	4718213	4718213	32	DEL
2L	11493532	11493532	33	DEL
3R	5347982	5347982	33	DEL
2L	10918684	10918684	33	DEL
3L	15168617	15168617	33	DEL
3L	12227062	12227062	33	DEL
3L	3527260	3527260	33	DEL
3R	31976538	31976538	33	DEL
3R	11280855	11280855	33	DEL
3R	24577868	24577868	33	DEL
2R	2226503	2226503	33	DEL
2R	6329965	6329965	33	DEL
2L	23493345	23493345	33	DEL
2R	5264581	5264581	33	DEL
2R	1915561	1915561	33	DEL
2R	4122834	4122834	33	DEL
2R	4282243	4282243	33	DEL
2R	5347845	5347845	33	DEL
2R	5502239	5502239	33	DEL
2R	5671457	5671457	33	DEL
2R	22529808	22529808	33	DEL
3L	23741371	23741371	33	DEL
3L	25912071	25912071	33	DEL
3L	23641054	23641054	33	DEL
3L	27887988	27887988	33	DEL
3L	24401508	24401508	33	DEL
3R	2095321	2095321	33	DEL
3R	2496131	2496131	33	DEL
3L	23433489	23433489	33	DEL
3L	23550885	23550885	33	DEL
Un_CP007101v1	14951	14951	33	DEL
X	22754126	22754126	33	DEL
X	15308	15308	33	DEL
X	22724758	22724758	33	DEL
X	5334905	5334905	33	DEL
X	20604026	20604026	33	DEL
X	1073193	1073193	33	DEL
X	21520289	21520289	33	DEL
X	20856881	20856881	33	DEL
2L	20107543	20107543	33	DEL
2L	21305629	21305629	33	DEL
X	19069390	19069390	34	DEL
3R	22000211	22000211	34	DEL
3L	10128556	10128556	34	DEL
3L	4121000	4121000	34	DEL
2L	21719920	21719920	34	DEL
2L	22006811	22006811	34	DEL
2L	22274119	22274119	34	DEL
2R	18221200	18221200	34	DEL
3L	24709629	24709629	34	DEL
3R	6015643	6015643	34	DEL
3R	19773965	19773965	34	DEL
3R	6462188	6462188	34	DEL
3L	23407259	23407259	34	DEL
3R	13396553	13396553	34	DEL
3R	749414	749414	34	DEL
X	20898075	20898075	34	DEL
X	21184431	21184431	34	DEL
X	22373009	22373009	34	DEL
X	22780900	22780900	34	DEL
2L	19467320	19467320	34	DEL
2L	2119949	2119949	34	DEL
2R	104301	104301	34	DEL
3L	20391735	20391735	35	DEL
X	10877258	10877258	35	DEL
3R	31359760	31359760	35	DEL
2R	11625436	11625436	35	DEL
3R	7764406	7764406	35	DEL
3R	31969178	31969178	35	DEL
2R	4358368	4358368	35	DEL
2R	5781812	5781812	35	DEL
2R	16222161	16222161	35	DEL
2R	17410993	17410993	35	DEL
2L	5021793	5021793	35	DEL
3L	24708413	24708413	35	DEL
3L	23570528	23570528	35	DEL
3L	6976923	6976923	35	DEL
3L	24776270	24776270	35	DEL
3R	1390460	1390460	35	DEL
3L	23146620	23146620	35	DEL
3L	23152170	23152170	35	DEL
3L	22426828	22426828	35	DEL
3L	26163350	26163350	35	DEL
3R	3901352	3901352	35	DEL
X	12096433	12096433	35	DEL
X	1819683	1819683	35	DEL
3R	20249281	20249281	35	DEL
3R	21735788	21735788	35	DEL
Un_CP007101v1	21575	21575	35	DEL
X	22372199	22372199	35	DEL
2L	20903609	20903609	35	DEL
3L	19052264	19052264	36	DEL
X	13117797	13117797	36	DEL
2L	21761634	21761634	36	DEL
2R	9747692	9747692	36	DEL
2R	21095940	21095940	36	DEL
2R	25004194	25004194	36	DEL
3L	15169540	15169540	36	DEL
2L	11051289	11051289	36	DEL
2R	11711919	11711919	36	DEL
2R	4815985	4815985	36	DEL
2R	4359076	4359076	36	DEL
3R	117415	117415	36	DEL
3R	1692126	1692126	36	DEL
3L	24215788	24215788	36	DEL
3R	6820914	6820914	36	DEL
Un_CP007085v1	18322	18322	36	DEL
3R	6822017	6822017	36	DEL
X	19805151	19805151	36	DEL
2L	16243530	16243530	36	DEL
X	22967474	22967474	36	DEL
3R	30248480	30248480	36	DEL
4	1180546	1180546	36	DEL
X	21910202	21910202	36	DEL
X	23447380	23447380	36	DEL
X	23286652	23286652	36	DEL
X	23431158	23431158	36	DEL
2R	2587690	2587690	36	DEL
2L	20413762	20413762	37	DEL
3R	13659720	13659720	37	DEL
3L	55118	55118	37	DEL
2R	7245547	7245547	37	DEL
3L	21104532	21104532	37	DEL
2L	21925322	21925322	37	DEL
2R	2086005	2086005	37	DEL
2R	2035696	2035696	37	DEL
2R	5040023	5040023	37	DEL
2R	5046535	5046535	37	DEL
3L	19864801	19864801	37	DEL
3R	449387	449387	37	DEL
3R	2468889	2468889	37	DEL
3L	24480062	24480062	37	DEL
4	1199848	1199848	37	DEL
3R	13331691	13331691	37	DEL
X	6417786	6417786	37	DEL
X	19110677	19110677	37	DEL
X	20365844	20365844	37	DEL
X_CP007103v1_random	25472	25472	37	DEL
2R	24476442	24476442	38	DEL
2L	22175824	22175824	38	DEL
2R	5119973	5119973	38	DEL
2R	41258	41258	38	DEL
2R	1933362	1933362	38	DEL
2R	2706198	2706198	38	DEL
2R	4354992	4354992	38	DEL
2R	5500180	5500180	38	DEL
3L	24418150	24418150	38	DEL
3L	19057946	19057946	38	DEL
3L	26124279	26124279	38	DEL
3L	23843244	23843244	38	DEL
3R	2220683	2220683	38	DEL
3L	23884260	23884260	38	DEL
3R	990448	990448	38	DEL
3L	23233836	23233836	38	DEL
X	23345744	23345744	38	DEL
2L	3329917	3329917	38	DEL
2L	21894066	21894066	38	DEL
2R	13332202	13332202	39	DEL
3R	4905392	4905392	39	DEL
2L	14983677	14983677	39	DEL
3R	1470265	1470265	39	DEL
3L	12427861	12427861	39	DEL
3L	16956363	16956363	39	DEL
2R	4830355	4830355	39	DEL
2R	394765	394765	39	DEL
3L	24039550	24039550	39	DEL
3R	2965254	2965254	39	DEL
3R	4063860	4063860	39	DEL
X	10396983	10396983	39	DEL
3R	27407009	27407009	40	DEL
2R	21848299	21848299	40	DEL
2R	16673242	16673242	40	DEL
3L	12261766	12261766	40	DEL
2L	12549055	12549055	40	DEL
2L	5084869	5084869	40	DEL
2R	16514410	16514410	40	DEL
3L	10570545	10570545	40	DEL
Un_CP007091v1	1421	1421	40	DEL
X	22728951	22728951	40	DEL
X	5615489	5615489	40	DEL
X_CP007104v1_random	15485	15485	40	DEL
2L	21253263	21253263	40	DEL
2L	12142418	12142418	41	DEL
2R	10927166	10927166	41	DEL
4	471212	471212	41	DEL
2L	14262947	14262947	41	DEL
2R	20788767	20788767	41	DEL
3L	23314275	23314275	41	DEL
3R	4020299	4020299	41	DEL
3L	23916080	23916080	41	DEL
X	12731155	12731155	41	DEL
X	21777755	21777755	41	DEL
2L	12953331	12953331	42	DEL
3L	8555452	8555452	42	DEL
2R	4448993	4448993	42	DEL
3L	1430629	1430629	42	DEL
3L	11683898	11683898	42	DEL
Un_CP007101v1	16374	16374	42	DEL
Un_CP007101v1	17029	17029	42	DEL
X	22411873	22411873	42	DEL
2R	1211242	1211242	42	DEL
3L	18849443	18849443	43	DEL
2L	12484932	12484932	43	DEL
4	653777	653777	43	DEL
3R	21590759	21590759	43	DEL
3R	18372449	18372449	43	DEL
3L	25425194	25425194	43	DEL
3R	3900755	3900755	43	DEL
2L	15045626	15045626	43	DEL
X	20276712	20276712	43	DEL
X	14741459	14741459	44	DEL
2L	20248974	20248974	44	DEL
2R	3104447	3104447	44	DEL
2R	4297110	4297110	44	DEL
2R	14434763	14434763	44	DEL
3L	24058390	24058390	44	DEL
2L	7004636	7004636	44	DEL
3R	2871562	2871562	44	DEL
3R	6014044	6014044	44	DEL
X	12071676	12071676	44	DEL
X	202120	202120	44	DEL
X	23451339	23451339	44	DEL
X_CP007103v1_random	24646	24646	44	DEL
X	8397856	8397856	44	DEL
X	22122945	22122945	44	DEL
2R	3482323	3482323	44	DEL
2R	17918038	17918038	45	DEL
3R	4598417	4598417	45	DEL
3L	21814494	21814494	45	DEL
2L	23196772	23196772	45	DEL
2L	23474128	23474128	45	DEL
2R	5474433	5474433	45	DEL
4	428119	428119	45	DEL
4	304408	304408	45	DEL
X	21921020	21921020	45	DEL
X	21554975	21554975	45	DEL
X	23190681	23190681	45	DEL
X	14761342	14761342	46	DEL
3R	20072606	20072606	46	DEL
3R	4994777	4994777	46	DEL
2R	18600739	18600739	46	DEL
3R	13113229	13113229	46	DEL
2R	1619195	1619195	46	DEL
2L	18036658	18036658	47	DEL
2R	16665074	16665074	47	DEL
3R	8354338	8354338	47	DEL
3R	6702273	6702273	47	DEL
X	3761478	3761478	47	DEL
X	8022137	8022137	47	DEL
2L	17279561	17279561	47	DEL
2R	15724524	15724524	48	DEL
2R	4693509	4693509	48	DEL
3L	27200989	27200989	48	DEL
X	14310891	14310891	48	DEL
2R	3681709	3681709	48	DEL
X	23521123	23521123	49	DEL
X	21747860	21747860	49	DEL
2R	4085806	4085806	49	DEL
3R	19963441	19963441	50	DEL
X	17376398	17376398	50	DEL
2R	4987827	4987827	50	DEL
2R	6163649	6163649	50	DEL
3L	25558006	25558006	50	DEL
3L	16643130	16643130	50	DEL
3R	3414419	3414419	50	DEL
2L	9344894	9344894	50	DEL
X_CP007103v1_random	28692	28692	50	DEL
X	22412835	22412835	50	DEL
3R	21946911	21946911	51	DEL
2R	5296845	5296845	51	DEL
3R	3095233	3095233	51	DEL
3L	20259644	20259644	51	DEL
3R	18516404	18516404	51	DEL
X	23374454	23374454	51	DEL
X	23243500	23243500	51	DEL
X	17245674	17245674	51	DEL
2R	15851853	15851853	52	DEL
3L	16160892	16160892	52	DEL
2L	21936117	21936117	52	DEL
3R	21461211	21461211	52	DEL
3R	28939900	28939900	52	DEL
3L	4738535	4738535	52	DEL
2R	4835720	4835720	52	DEL
Un_CP007095v1	5179	5179	52	DEL
X_CP007103v1_random	25987	25987	52	DEL
X_CP007103v1_random	32950	32950	52	DEL
2R	5673670	5673670	53	DEL
3L	24442730	24442730	53	DEL
3R	9195083	9195083	53	DEL
Un_CP007120v1	36401	36401	53	DEL
3R	31304366	31304366	53	DEL
X	22976339	22976339	53	DEL
3R	15113616	15113616	54	DEL
3L	7656115	7656115	54	DEL
2R	9738385	9738385	54	DEL
2R	23747775	23747775	54	DEL
X	16535239	16535239	54	DEL
2R	6078257	6078257	55	DEL
3R	6966629	6966629	55	DEL
4	1218345	1218345	55	DEL
Un_CP007085v1	44660	44660	55	DEL
3R	4969077	4969077	55	DEL
X	14315022	14315022	55	DEL
4	1346705	1346705	55	DEL
3R	17005116	17005116	56	DEL
2L	22063355	22063355	56	DEL
2R	1491992	1491992	56	DEL
4	342371	342371	56	DEL
4	683660	683660	56	DEL
X	20495002	20495002	56	DEL
X	22953050	22953050	56	DEL
2L	6825653	6825653	57	DEL
2L	13274193	13274193	57	DEL
3L	18229704	18229704	57	DEL
3R	28422436	28422436	57	DEL
3R	18336828	18336828	57	DEL
4	1333882	1333882	57	DEL
X	22372614	22372614	57	DEL
X	23283408	23283408	57	DEL
X	21054376	21054376	58	DEL
3R	23582078	23582078	58	DEL
3L	18453779	18453779	58	DEL
X	22900242	22900242	58	DEL
2R	2773518	2773518	58	DEL
3L	11555234	11555234	59	DEL
2R	1632405	1632405	59	DEL
3L	23922540	23922540	59	DEL
3R	2088043	2088043	59	DEL
3R	14697540	14697540	59	DEL
X	23347398	23347398	59	DEL
2L	23160647	23160647	59	DEL
3R	14863704	14863704	60	DEL
3L	22912319	22912319	60	DEL
3L	15146098	15146098	60	DEL
3L	10394237	10394237	60	DEL
2R	5106835	5106835	60	DEL
Un_CP007091v1	4454	4454	60	DEL
X	22258051	22258051	60	DEL
Un_CP007120v1	22407	22407	60	DEL
X	23349923	23349923	60	DEL
2R	9746948	9746948	61	DEL
3L	9645592	9645592	61	DEL
2R	11194918	11194918	61	DEL
2L	7552657	7552657	61	DEL
3R	2582918	2582918	61	DEL
X	23442465	23442465	61	DEL
2L	18155540	18155540	61	DEL
2L	12872249	12872249	62	DEL
3R	31992284	31992284	62	DEL
3L	18847196	18847196	63	DEL
4	1278322	1278322	63	DEL
3R	21405549	21405549	63	DEL
Un_CP007101v1	23233	23233	63	DEL
2L	5739562	5739562	64	DEL
Un_CP007101v1	19093	19093	64	DEL
3L	21143675	21143675	65	DEL
2R	4298110	4298110	65	DEL
2R	9609921	9609921	65	DEL
3R	2454552	2454552	65	DEL
3R	32074639	32074639	65	DEL
2L	5522105	5522105	66	DEL
3R	972973	972973	66	DEL
3L	12901335	12901335	66	DEL
3R	3903209	3903209	66	DEL
Un_CP007101v1	18032	18032	66	DEL
4	627778	627778	66	DEL
X_CP007104v1_random	16228	16228	66	DEL
X	22946464	22946464	66	DEL
2R	13577991	13577991	67	DEL
3R	9774717	9774717	67	DEL
2L	3307621	3307621	67	DEL
3L	9864156	9864156	67	DEL
3L	24308525	24308525	67	DEL
2R	22967884	22967884	68	DEL
2R	12298480	12298480	68	DEL
2R	2062415	2062415	68	DEL
2L	7085018	7085018	68	DEL
3L	23752483	23752483	68	DEL
X	8753009	8753009	68	DEL
3R	28426494	28426494	69	DEL
3L	687401	687401	69	DEL
2R	4288355	4288355	69	DEL
3R	477226	477226	69	DEL
X	108761	108761	69	DEL
Un_CP007101v1	22784	22784	69	DEL
2L	21655724	21655724	69	DEL
3R	17760940	17760940	70	DEL
2L	9391627	9391627	70	DEL
3R	30107615	30107615	70	DEL
3R	3341249	3341249	70	DEL
3R	5719957	5719957	70	DEL
X	23350488	23350488	70	DEL
X	14136557	14136557	71	DEL
X	23346738	23346738	71	DEL
2R	22524420	22524420	72	DEL
3R	25347363	25347363	72	DEL
2R	5040732	5040732	72	DEL
X	23367960	23367960	72	DEL
3R	14008241	14008241	72	DEL
X	23369311	23369311	72	DEL
X	19275597	19275597	73	DEL
3R	27828405	27828405	73	DEL
2L	15773434	15773434	73	DEL
2L	12964982	12964982	73	DEL
3L	19792820	19792820	73	DEL
2R	5503190	5503190	73	DEL
2R	13798123	13798123	73	DEL
3R	863361	863361	73	DEL
3L	25727607	25727607	73	DEL
X	17167166	17167166	73	DEL
3R	16914302	16914302	73	DEL
3L	24216506	24216506	74	DEL
2L	8339856	8339856	74	DEL
3R	27872960	27872960	75	DEL
2L	13973857	13973857	75	DEL
3L	12427013	12427013	75	DEL
3L	9758109	9758109	75	DEL
2L	23434362	23434362	75	DEL
3L	15344562	15344562	76	DEL
2R	13320960	13320960	76	DEL
2L	21586178	21586178	76	DEL
3L	10068742	10068742	77	DEL
2R	5095442	5095442	77	DEL
2R	5468808	5468808	77	DEL
X	23431764	23431764	77	DEL
2L	11057661	11057661	77	DEL
3L	18855003	18855003	78	DEL
2R	17640249	17640249	78	DEL
3L	7759168	7759168	78	DEL
2L	2599876	2599876	78	DEL
3L	17633335	17633335	79	DEL
X	11237592	11237592	79	DEL
X	21593600	21593600	79	DEL
X	22843078	22843078	79	DEL
2L	6117999	6117999	80	DEL
2R	18782332	18782332	80	DEL
3R	32078660	32078660	80	DEL
4	1289622	1289622	80	DEL
3R	32073740	32073740	80	DEL
X	10921250	10921250	80	DEL
3R	9822013	9822013	81	DEL
2L	22191187	22191187	81	DEL
2L	14801475	14801475	82	DEL
3R	2122959	2122959	82	DEL
X	22973150	22973150	82	DEL
2R	5720695	5720695	83	DEL
3L	18855004	18855004	83	DEL
3L	24230598	24230598	83	DEL
3L	23258894	23258894	83	DEL
3R	20068308	20068308	83	DEL
2L	22114543	22114543	83	DEL
2L	8092557	8092557	84	DEL
2R	22134154	22134154	84	DEL
3L	6864190	6864190	84	DEL
3R	22535961	22535961	84	DEL
2L	776521	776521	84	DEL
2L	5072078	5072078	84	DEL
3R	2077126	2077126	84	DEL
X	21777140	21777140	84	DEL
3L	18499474	18499474	85	DEL
2R	18748965	18748965	85	DEL
2R	22573413	22573413	85	DEL
2L	8720369	8720369	85	DEL
3R	16247796	16247796	85	DEL
3R	2606745	2606745	85	DEL
X_CP007103v1_random	30318	30318	85	DEL
2R	19215361	19215361	86	DEL
2L	16228103	16228103	86	DEL
2L	2538499	2538499	86	DEL
3L	5633773	5633773	86	DEL
3L	20327381	20327381	86	DEL
2L	9902728	9902728	86	DEL
Un_CP007101v1	19779	19779	86	DEL
2R	2428042	2428042	87	DEL
X	3739853	3739853	87	DEL
2R	25076506	25076506	88	DEL
3R	15197939	15197939	88	DEL
2L	3921568	3921568	89	DEL
2L	13891852	13891852	90	DEL
3L	17119874	17119874	90	DEL
2L	12322373	12322373	91	DEL
2L	23057047	23057047	91	DEL
X_CP007103v1_random	29426	29426	91	DEL
3L	6670253	6670253	92	DEL
3L	12635104	12635104	92	DEL
3L	5316453	5316453	92	DEL
2R	9212091	9212091	92	DEL
3L	24987528	24987528	92	DEL
Un_CP007085v1	43798	43798	92	DEL
2R	3891871	3891871	93	DEL
3L	23737558	23737558	93	DEL
2R	3895317	3895317	93	DEL
X	5259700	5259700	94	DEL
2L	22094131	22094131	94	DEL
2R	9871524	9871524	95	DEL
3L	23906	23906	96	DEL
X	7041927	7041927	96	DEL
3L	6663174	6663174	97	DEL
3L	6432710	6432710	97	DEL
3R	5011812	5011812	97	DEL
X	14890075	14890075	97	DEL
2L	20221332	20221332	97	DEL
3R	16940302	16940302	98	DEL
3R	9942863	9942863	98	DEL
3R	2518052	2518052	98	DEL
3R	2606073	2606073	98	DEL
X_CP007103v1_random	30867	30867	98	DEL
X	13557726	13557726	98	DEL
X	22939290	22939290	98	DEL
3L	15347229	15347229	99	DEL
3L	349081	349081	99	DEL
3L	23178448	23178448	99	DEL
3L	25306758	25306758	99	DEL
Un_CP007074v1	27000	27000	99	DEL
3L	13206998	13206998	100	DEL
3R	27396877	27396877	100	DEL
3R	209519	209519	100	DEL
X	6744438	6744438	100	DEL
3L	24078954	24078954	101	DEL
3R	2328191	2328191	101	DEL
2R	5399599	5399599	102	DEL
2R	5311497	5311497	102	DEL
3L	26550111	26550111	102	DEL
3R	12894036	12894036	102	DEL
3L	28103139	28103139	102	DEL
Un_CP007091v1	649	649	102	DEL
2L	19968271	19968271	102	DEL
2R	19053328	19053328	103	DEL
3R	20175598	20175598	103	DEL
2R	8776698	8776698	103	DEL
3L	14965599	14965599	103	DEL
4	346034	346034	103	DEL
2R	15475675	15475675	104	DEL
3L	17558207	17558207	104	DEL
2L	2646519	2646519	104	DEL
X	23420245	23420245	104	DEL
2L	22545780	22545780	104	DEL
2R	23141929	23141929	106	DEL
3L	27889410	27889410	106	DEL
3L	19220025	19220025	106	DEL
X_CP007104v1_random	25121	25121	106	DEL
3L	10717745	10717745	107	DEL
2R	6109172	6109172	109	DEL
3L	23107114	23107114	109	DEL
Un_CP007101v1	22171	22171	109	DEL
2L	19625282	19625282	110	DEL
3L	17916066	17916066	110	DEL
2R	4549430	4549430	110	DEL
3L	24042094	24042094	112	DEL
3L	27894140	27894140	114	DEL
3R	2607342	2607342	115	DEL
3R	15460498	15460498	116	DEL
3L	22882479	22882479	116	DEL
X	21582494	21582494	117	DEL
3R	31017204	31017204	117	DEL
2R	15205117	15205117	117	DEL
2L	17368520	17368520	119	DEL
2L	12310440	12310440	120	DEL
2L	17749599	17749599	120	DEL
3L	24573634	24573634	121	DEL
2R	14923793	14923793	122	DEL
2L	22390033	22390033	122	DEL
2L	3041815	3041815	123	DEL
3L	10020802	10020802	123	DEL
2R	20961853	20961853	123	DEL
3L	23050252	23050252	123	DEL
X	23208223	23208223	123	DEL
2L	14913730	14913730	123	DEL
3R	7885650	7885650	124	DEL
3R	14916427	14916427	125	DEL
3L	17130618	17130618	129	DEL
2R	18989722	18989722	129	DEL
2L	23039419	23039419	130	DEL
2L	22738561	22738561	131	DEL
2L	10757572	10757572	132	DEL
3L	14582415	14582415	133	DEL
2R	14569071	14569071	133	DEL
3L	23349985	23349985	133	DEL
X	18470791	18470791	133	DEL
X	20525894	20525894	135	DEL
3L	3516852	3516852	136	DEL
3L	9120433	9120433	136	DEL
2L	21017450	21017450	136	DEL
2R	1978164	1978164	137	DEL
2R	10790026	10790026	138	DEL
3R	14957817	14957817	138	DEL
3R	26260001	26260001	139	DEL
3L	9280410	9280410	139	DEL
4	1279696	1279696	140	DEL
2R	18310882	18310882	141	DEL
X	700965	700965	141	DEL
2L	21152781	21152781	141	DEL
X	20963980	20963980	142	DEL
3R	26509219	26509219	142	DEL
2L	9026270	9026270	143	DEL
3R	20724936	20724936	143	DEL
3R	13449383	13449383	143	DEL
2L	10619768	10619768	143	DEL
2R	13683005	13683005	144	DEL
3L	26027038	26027038	144	DEL
2R	17615480	17615480	145	DEL
2L	18027432	18027432	145	DEL
3R	26492262	26492262	147	DEL
3R	13544050	13544050	148	DEL
2L	18597651	18597651	149	DEL
3L	2391512	2391512	149	DEL
Un_CP007081v1	87874	87874	149	DEL
X	13486731	13486731	149	DEL
2L	4211325	4211325	150	DEL
3R	30479077	30479077	150	DEL
3R	4680638	4680638	151	DEL
2R	12817899	12817899	151	DEL
3L	14532022	14532022	152	DEL
2L	17466003	17466003	152	DEL
3R	16503915	16503915	153	DEL
2R	25261552	25261552	153	DEL
3L	26046588	26046588	153	DEL
2L	11297142	11297142	153	DEL
2L	17784956	17784956	154	DEL
2L	19386025	19386025	155	DEL
2L	4763650	4763650	156	DEL
4	344056	344056	156	DEL
4	987446	987446	157	DEL
2R	12221009	12221009	157	DEL
3L	23419684	23419684	157	DEL
X	16162277	16162277	158	DEL
2R	4798341	4798341	159	DEL
2L	7639149	7639149	159	DEL
2R	23616740	23616740	160	DEL
2R	19963909	19963909	160	DEL
3L	11593435	11593435	160	DEL
X	1104607	1104607	163	DEL
X	15630185	15630185	164	DEL
3L	21085540	21085540	164	DEL
2L	22280699	22280699	164	DEL
2L	19386659	19386659	164	DEL
3L	24380369	24380369	165	DEL
2L	20805129	20805129	166	DEL
3L	4934457	4934457	166	DEL
2L	17104649	17104649	166	DEL
3R	31179299	31179299	167	DEL
3R	3381364	3381364	168	DEL
3R	25773378	25773378	169	DEL
3L	18966303	18966303	169	DEL
X	11525608	11525608	169	DEL
2L	10905320	10905320	170	DEL
3R	12879165	12879165	170	DEL
3L	2175468	2175468	171	DEL
3L	18939166	18939166	171	DEL
3R	3949950	3949950	171	DEL
3L	145705	145705	172	DEL
3L	20321081	20321081	172	DEL
X	22271939	22271939	173	DEL
3L	10246886	10246886	175	DEL
X	15283271	15283271	175	DEL
3L	17199506	17199506	176	DEL
2R	24276431	24276431	176	DEL
2L	10166837	10166837	178	DEL
X	18490329	18490329	179	DEL
2L	15845190	15845190	179	DEL
X	23522259	23522259	181	DEL
3R	30103688	30103688	182	DEL
2R	2087472	2087472	182	DEL
3L	23641925	23641925	184	DEL
2L	22924428	22924428	186	DEL
3L	27798845	27798845	186	DEL
X	23511251	23511251	186	DEL
2R	1377986	1377986	186	DEL
3R	23871707	23871707	187	DEL
X	11859195	11859195	188	DEL
2R	19931311	19931311	188	DEL
X	23483358	23483358	188	DEL
3R	5765062	5765062	192	DEL
4	829045	829045	192	DEL
3R	21550659	21550659	192	DEL
2R	12238922	12238922	192	DEL
2R	8018416	8018416	192	DEL
3R	17833724	17833724	194	DEL
3L	8213796	8213796	195	DEL
2L	14526534	14526534	196	DEL
3R	25425222	25425222	197	DEL
2R	5249921	5249921	197	DEL
3R	556884	556884	197	DEL
3R	25931692	25931692	197	DEL
2R	6311583	6311583	198	DEL
3L	14260008	14260008	199	DEL
3R	2517460	2517460	199	DEL
3R	5684124	5684124	200	DEL
3R	2086736	2086736	201	DEL
3R	2505370	2505370	201	DEL
3L	18552502	18552502	202	DEL
3L	14886525	14886525	202	DEL
3R	13589454	13589454	202	DEL
2R	4981022	4981022	204	DEL
3L	21508544	21508544	204	DEL
X	21529659	21529659	204	DEL
2R	1927078	1927078	205	DEL
2L	23052077	23052077	207	DEL
2R	3900488	3900488	208	DEL
3R	26197135	26197135	208	DEL
X	3364412	3364412	208	DEL
X	10088784	10088784	212	DEL
3L	27138403	27138403	215	DEL
3L	25728644	25728644	215	DEL
2L	5871705	5871705	216	DEL
2L	13483316	13483316	216	DEL
3R	25755226	25755226	217	DEL
2R	4710173	4710173	218	DEL
3L	5606975	5606975	218	DEL
3R	7915637	7915637	218	DEL
2R	12926710	12926710	219	DEL
2R	6689359	6689359	223	DEL
3L	23468095	23468095	223	DEL
3L	19960253	19960253	224	DEL
3L	13864821	13864821	224	DEL
3R	1484713	1484713	224	DEL
2L	6367413	6367413	225	DEL
3R	25341878	25341878	227	DEL
2R	19003010	19003010	228	DEL
2L	7171594	7171594	228	DEL
2R	18383750	18383750	229	DEL
X	65700	65700	229	DEL
2L	20223180	20223180	229	DEL
3L	4647550	4647550	230	DEL
3R	27910071	27910071	231	DEL
X	16536819	16536819	231	DEL
3L	5711468	5711468	232	DEL
2L	13247107	13247107	232	DEL
X	23473411	23473411	232	DEL
2L	14895792	14895792	233	DEL
3R	8037658	8037658	233	DEL
2L	2729952	2729952	233	DEL
X	22935449	22935449	235	DEL
3L	19349993	19349993	236	DEL
3R	3833496	3833496	237	DEL
2L	22245504	22245504	239	DEL
3L	5290933	5290933	240	DEL
3R	21737679	21737679	241	DEL
3R	20943800	20943800	241	DEL
3L	10915969	10915969	242	DEL
3L	3034495	3034495	245	DEL
X	14046725	14046725	246	DEL
2L	16194009	16194009	246	DEL
X	12656221	12656221	247	DEL
3L	20454299	20454299	249	DEL
3R	18097102	18097102	252	DEL
3R	6060844	6060844	253	DEL
2R	5070954	5070954	254	DEL
3L	6556377	6556377	254	DEL
X	22922460	22922460	255	DEL
3L	18847851	18847851	256	DEL
2L	10681043	10681043	257	DEL
2R	10202999	10202999	259	DEL
2L	22403422	22403422	259	DEL
X	22390603	22390603	260	DEL
3R	20483150	20483150	261	DEL
3R	29236583	29236583	261	DEL
2L	804750	804750	262	DEL
3R	2087816	2087816	264	DEL
3R	13656491	13656491	264	DEL
3R	18399378	18399378	265	DEL
2R	6606763	6606763	269	DEL
2L	6138353	6138353	269	DEL
X	11026696	11026696	270	DEL
2R	6869500	6869500	271	DEL
2R	637027	637027	271	DEL
2R	20005061	20005061	271	DEL
3L	11392730	11392730	271	DEL
3R	21197553	21197553	272	DEL
3L	25694111	25694111	274	DEL
3L	19555985	19555985	277	DEL
3R	3284468	3284468	277	DEL
3L	22097090	22097090	278	DEL
2L	17169676	17169676	278	DEL
2L	23197697	23197697	279	DEL
3R	20472706	20472706	280	DEL
3L	21045544	21045544	282	DEL
2R	12478939	12478939	282	DEL
3L	6637003	6637003	282	DEL
3R	1050668	1050668	282	DEL
3L	25837166	25837166	283	DEL
2L	22670180	22670180	286	DEL
2L	22270879	22270879	287	DEL
3R	22435485	22435485	288	DEL
2L	4135865	4135865	288	DEL
3R	28315825	28315825	288	DEL
2R	22019798	22019798	289	DEL
3R	30902340	30902340	289	DEL
2L	16067960	16067960	291	DEL
2R	24517824	24517824	292	DEL
2R	3637128	3637128	294	DEL
2R	6263002	6263002	294	DEL
3R	25905267	25905267	294	DEL
2R	12391716	12391716	295	DEL
3L	11238013	11238013	295	DEL
X	23429697	23429697	295	DEL
2L	169990	169990	298	DEL
3R	10061998	10061998	299	DEL
3R	31422880	31422880	299	DEL
2R	24409941	24409941	300	DEL
4	706743	706743	301	DEL
3L	13315202	13315202	308	DEL
Un_CP007101v1	17374	17374	309	DEL
2L	12811460	12811460	309	DEL
2R	7374792	7374792	314	DEL
3R	31424456	31424456	315	DEL
2L	18417956	18417956	316	DEL
4	1193007	1193007	316	DEL
3L	23551303	23551303	316	DEL
3L	12368708	12368708	317	DEL
2L	21062641	21062641	318	DEL
2L	7398345	7398345	319	DEL
X	18934988	18934988	320	DEL
3R	9851714	9851714	325	DEL
2R	5570326	5570326	326	DEL
3R	2204851	2204851	327	DEL
X	19541184	19541184	330	DEL
3L	7396431	7396431	331	DEL
2L	16232795	16232795	331	DEL
2R	3062699	3062699	333	DEL
2R	5262937	5262937	334	DEL
3R	23108747	23108747	335	DEL
2L	7623446	7623446	335	DEL
3R	9481536	9481536	337	DEL
X	2800236	2800236	339	DEL
3L	27876469	27876469	343	DEL
2L	12511915	12511915	344	DEL
3R	751000	751000	347	DEL
2R	13462436	13462436	348	DEL
3L	10470371	10470371	348	DEL
X	2426746	2426746	348	DEL
3R	26800271	26800271	349	DEL
Un_CP007101v1	19096	19096	353	DEL
2R	5449494	5449494	354	DEL
X	22755018	22755018	354	DEL
3L	20341258	20341258	355	DEL
3L	21737605	21737605	357	DEL
2L	800150	800150	358	DEL
X	3579227	3579227	358	DEL
X	22055363	22055363	361	DEL
3R	26352361	26352361	361	DEL
X_CP007103v1_random	12814	12814	361	DEL
3L	23793725	23793725	364	DEL
2L	21243269	21243269	365	DEL
2R	25262227	25262227	366	DEL
X	22018933	22018933	368	DEL
2L	22190505	22190505	371	DEL
2R	16391304	16391304	371	DEL
X	22755564	22755564	371	DEL
X	988573	988573	374	DEL
2L	17272254	17272254	375	DEL
X	8296718	8296718	377	DEL
2L	11601867	11601867	378	DEL
2R	16642435	16642435	384	DEL
4	344878	344878	385	DEL
X	12757544	12757544	385	DEL
2L	14874197	14874197	385	DEL
3R	21125104	21125104	386	DEL
2R	5701444	5701444	390	DEL
3L	24153774	24153774	393	DEL
2R	15576683	15576683	396	DEL
2L	5289695	5289695	396	DEL
X	23521541	23521541	396	DEL
3L	3446377	3446377	400	DEL
3L	17256193	17256193	401	DEL
3L	27139036	27139036	403	DEL
3L	24827796	24827796	415	DEL
2L	6152731	6152731	416	DEL
2L	14096355	14096355	416	DEL
3R	1306194	1306194	423	DEL
X	23375131	23375131	424	DEL
3R	26421974	26421974	431	DEL
3R	32077662	32077662	431	DEL
2L	4893719	4893719	436	DEL
3R	12103877	12103877	437	DEL
2R	5924397	5924397	441	DEL
3R	16321441	16321441	442	DEL
3R	11442129	11442129	443	DEL
3R	32076666	32076666	444	DEL
2L	11024042	11024042	445	DEL
X_CP007103v1_random	24830	24830	447	DEL
2R	5264936	5264936	454	DEL
3R	2203013	2203013	475	DEL
X	23421090	23421090	477	DEL
X	23362894	23362894	480	DEL
X	3779654	3779654	480	DEL
3L	19465464	19465464	484	DEL
X_CP007103v1_random	31843	31843	484	DEL
3R	8128681	8128681	488	DEL
3R	27432060	27432060	490	DEL
3L	11914473	11914473	490	DEL
3R	7600136	7600136	494	DEL
X	55026	55026	514	DEL
3L	23408977	23408977	517	DEL
3R	8026345	8026345	521	DEL
3R	17262161	17262161	524	DEL
3R	7645511	7645511	526	DEL
4	347347	347347	531	DEL
X	22727549	22727549	540	DEL
2R	8499132	8499132	541	DEL
2R	20675018	20675018	544	DEL
3L	23154682	23154682	544	DEL
2L	16376753	16376753	557	DEL
3L	14719485	14719485	570	DEL
2L	22632915	22632915	579	DEL
X	2458486	2458486	585	DEL
3R	22506023	22506023	594	DEL
3R	21245748	21245748	597	DEL
3L	27883401	27883401	598	DEL
3L	10474458	10474458	616	DEL
X	22410390	22410390	628	DEL
2R	12702949	12702949	631	DEL
X	6443155	6443155	633	DEL
2L	22172338	22172338	634	DEL
2R	3194020	3194020	638	DEL
X	9106769	9106769	644	DEL
X	23431865	23431865	661	DEL
4	311284	311284	664	DEL
3L	13265413	13265413	672	DEL
2R	5695060	5695060	675	DEL
3L	20033442	20033442	683	DEL
2R	3919704	3919704	696	DEL
2R	1243932	1243932	703	DEL
X	984412	984412	707	DEL
3R	3771389	3771389	708	DEL
3R	31947209	31947209	751	DEL
3R	25458935	25458935	765	DEL
3R	30816824	30816824	775	DEL
2L	19557058	19557058	790	DEL
2L	12331820	12331820	802	DEL
3R	7687601	7687601	816	DEL
3R	5163799	5163799	844	DEL
2R	1932853	1932853	852	DEL
3R	22827655	22827655	866	DEL
3L	8395280	8395280	888	DEL
2R	5215369	5215369	921	DEL
X	10262111	10262111	962	DEL
3L	81481	81481	966	DEL
X	13279973	13279973	974	DEL
4	409370	409370	1051	DEL
3R	8634481	8634481	1088	DEL
X	12524752	12524752	1124	DEL
3L	24260404	24260404	1167	DEL
3R	1471929	1471929	1173	DEL
2R	5374193	5374193	1175	DEL
3L	1210726	1210726	1187	DEL
3L	24049959	24049959	1189	DEL
3R	4190960	4190960	1197	DEL
2R	5319022	5319022	1202	DEL
X	12683458	12683458	1215	DEL
2L	22196939	22196939	1278	DEL
3R	6821363	6821363	1304	DEL
2R	5531433	5531433	1419	DEL
2L	23467974	23467974	1477	DEL
2R	4163337	4163337	1532	DEL
3L	23146546	23146546	1560	DEL
2L	21780075	21780075	1583	DEL
2L	23018240	23018240	1644	DEL
2R	6465888	6465888	1808	DEL
2L	23313721	23313721	1850	DEL
3R	3471426	3471426	1930	DEL
3L	8959453	8959453	1955	DEL
X	10439280	10439280	1977	DEL
3L	23956142	23956142	1986	DEL
2R	7783355	7783355	2070	DEL
3L	24899758	24899758	2071	DEL
3R	2943256	2943256	2101	DEL
3R	951347	951347	2106	DEL
2L	22639644	22639644	2147	DEL
3L	24399240	24399240	2148	DEL
2R	15502895	15502895	2343	DEL
3L	23215681	23215681	2574	DEL
3L	23940471	23940471	2610	DEL
X	15026058	15026058	2641	DEL
3L	23563143	23563143	2860	DEL
3R	3017468	3017468	3032	DEL
3L	23106181	23106181	3161	DEL
3L	27293808	27293808	3282	DEL
2L	23230895	23230895	3546	DEL
2L	22635776	22635776	4371	DEL
2L	22236230	22236230	4804	DEL
2R	73179	73179	4889	DEL
2R	4526309	4526309	5017	DEL
2R	1568402	1568402	5337	DEL
2R	1022417	1022417	5508	DEL
3L	14260385	14260385	5542	DEL
2R	393416	393416	5610	DEL
2R	947330	947330	5907	DEL
2L	23049167	23049167	6256	DEL
2R	4418537	4418537	6440	DEL
3L	23818938	23818938	7457	DEL
2R	4831408	4831408	7589	DEL
2R	2096913	2096913	7626	DEL
