# Supplementary material for: Rapid evolution of piRNA clusters in the Drosophila melanogaster ovary
Source: HighWire-hosted journal article supplement (doi:10.1101/gr.278062.123), 2024-05-01
Supplement: Supplemental_Material.zip [file Supplementary_Table_S7.xlsx]

## Sheet: Table_S7
Supplementary Table S7. TE family classification.

## Sheet: Dmel_repmod2_TE_filtered_librar
TE_family	consensus_length	Class	Superfamily
17.6	7439	LTR	Gypsy
297	6995	LTR	Gypsy
1731	4648	LTR	Ty1-Copia
accord	7404	LTR	Gypsy
accord2	7650	LTR	Gypsy
Baggins1	5453	LINE	R1
Bari1	1728	DNA	Tc1-Mariner
Bari2	1064	DNA	Tc1-Mariner
BEL	6126	LTR	BEL-Pao
Bica	4943	LTR	Gypsy
blood	7410	LTR	Gypsy
BS	5142	LINE	I-Jockey
BS2	4721	LINE	I-Jockey
BS3	1790	LINE	I-Jockey
BS4	754	LINE	I-Jockey
Burdock	6411	LINE	I-Jockey
Chimpo	4473	NA	Gypsy
Chouto	6951	LTR	Gypsy
Circe	7450	LTR	Gypsy
copia	5143	LTR	Ty1-Copia
copia2	4558	LTR	Ty1-Copia
diver	6112	LTR	BEL-Pao
diver2	4917	LTR	BEL-Pao
DM_1360	3409	DNA	P
Dm-412	7455	LTR	Gypsy
Dm88	4558	LTR	Ty1-Copia
DNAREP1	594	DNA	Helitron-1
DNAREP1-like	599	DNA	Helitron-1
Doc	4725	LINE	I-Jockey
Doc2	4789	LINE	I-Jockey
Doc3	4740	LINE	I-Jockey
Doc4	2791	LINE	I-Jockey
Doc5	4682	LINE	I-Jockey
family-0_Copia-like	5694	LTR	Ty1-Copia
family-0_MULE-NOF	1418	DNA	Mutator-like
family-100_HMS-beagle	1616	LTR	Gypsy
family-105_gypsy	2280	LTR	Gypsy
family-110_gypsy_SAP	2767	LTR	Gypsy
family-1124_gypsy-frag	2059	LTR	Gypsy
family-113_micropia-like	3978	LTR	Gypsy
family-117_gypsy	5642	LTR	Gypsy
family-1205_Tc3	1617	DNA	Tc1-Mariner
family-134_gypsy	3573	LTR	Gypsy
family-139_FW2-like	4740	LINE	I-Jockey
family-1439_Tc3	1774	DNA	Tc1-Mariner
family-149_HMS-beagle	2763	LTR	Gypsy
family-15_G-like	6710	LINE	I-Jockey
family-2202_Pao	1346	LTR	BEL-Pao
family-2226_Tc1-like	1616	DNA	Tc1-Mariner
family-2266_Blastopia-like	2318	LTR	Gypsy
family-252_hAT_BEDzf	1106	DNA	hAT
family-325_gypsy	4661	LTR	Gypsy
family-358_hAT	3180	DNA	hAT
family-3655_gypsy	4518	LTR	Gypsy
family-3830_accord-like	2248	LTR	gypsy
family-4408_gypsy	2650	LTR	Gypsy
family-447_HETA-like	6179	LINE	I-Jockey
family-49_Tc3	1526	DNA	Tc1-Mariner
family-4955_hAT	990	DNA	hAT
family-5171_Pao	791	LTR	BEL-Pao
family-53_gypsy_truncated	4065	LTR	Gypsy
family-58_micropia-like	4578	LTR	Gypsy
family-6086_diver	2018	LTR	BEL-Pao
family-63_micropia-like	4582	LTR	Gypsy
family-70_Diver2-like	3650	LTR	BEL-Pao
family-70_diver-like	4890	LTR	BEL-Pao
family-7121_ninja-like	4041	LTR	BEL-Pao
family-732_gypsy	2020	LTR	Gypsy
family-92_copia-like	2231	LTR	Ty1-Copia
family-966_Pao	5047	LTR	BEL-Pao
family-999_gypsy	3524	LTR	Gypsy
FB	1106	DNA	Tc1-Mariner
F-element	4708	LINE	I-Jockey
flea	5034	LTR	Gypsy
frogger	2483	LTR	Ty1-Copia
Fw2	3961	LINE	I-Jockey
Fw3	3132	LINE	I-Jockey
G2	3102	LINE	I-Jockey
G3	4605	LINE	I-Jockey
G4	3856	LINE	I-Jockey
G5	4856	LINE	I-Jockey
G5A	2841	LINE	I-Jockey
G6	2042	LINE	I-Jockey
GATE	8507	LTR	Gypsy
Gedeo_Dmel	7470	LTR	Gypsy
G-element	4346	LINE	I-Jockey
gtwin	7411	LTR	Gypsy
gypsy	7469	LTR	Gypsy
gypsy10	6006	LTR	Gypsy
gypsy11	4428	LTR	Gypsy
gypsy12	10218	LTR	Gypsy
gypsy12A	2280	LTR	Gypsy
gypsy2	6841	LTR	Gypsy
gypsy2S	7401	LTR	Gypsy
gypsy3	6973	LTR	Gypsy
gypsy4	6852	LTR	Gypsy
gypsy5	7369	LTR	Gypsy
gypsy6	7878	LTR	Gypsy
gypsy7	5486	LTR	Gypsy
gypsy8	4955	LTR	Gypsy
gypsy9	5349	LTR	Gypsy
HB	1653	DNA	Tc1-Mariner
Helena	1317	LINE	I-Jockey
HeT-A	6083	LINE	I-Jockey
HMS-Beagle	7062	LTR	Gypsy
hobo	2959	DNA	Hobo
hopper	1435	DNA	Transib
hopper2	1593	DNA	Transib
Idefix	6816	LTR	Gypsy
I-element	5371	LINE	I-Jockey
invader1	4032	LTR	Gypsy
invader2	5124	LTR	Gypsy
invader3	5484	LTR	Gypsy
invader4	3105	LTR	Gypsy
invader5	4038	LTR	Gypsy
Ivk	5402	LINE	I-Jockey
jockey	5020	LINE	I-Jockey
jockey2	3428	LINE	I-Jockey
Juan	4236	LINE	I-Jockey
looper1	1881	DNA	PiggyBac
M4DM	1435	DNA	Tc1-Mariner
mariner2	912	DNA	Tc1-Mariner
Max-element	8556	LTR	BEL-Pao
McClintock	6450	LTR	Gypsy
mdg1	7480	LTR	Gypsy
mdg3	5519	LTR	Gypsy
micropia	5461	LTR	Gypsy
Minos_DM	1165	DNA	Tc1-Mariner
ninja-aurora	4263	LTR	BEL-Pao
NOF	4347	DNA	Mutator-like
Nomad	6879	LTR	Gypsy
P-element	2907	DNA	P
Phanio_Dmel	7409	LTR	Gypsy
Phidippo_Dmel	7278	LTR	Gypsy
Pifo_A	7699	LTR	Gypsy
pogo	2121	DNA	Pogo
Quasimodo	7387	LTR	Gypsy
Quasimodo2	6496	LTR	Gypsy
R1	5356	LINE	R1
R1-2	3216	LINE	R1
R1A1-element	5356	LINE	R1
R2-element	3607	LINE	R2
rnd-1_family-1_copia	4063	LTR	Ty1-Copia
rnd-1_family-13_jockey	3909	LINE	I-Jockey
rnd-1_family-85_gypsy	2289	LTR	Gypsy
rnd-5_family-560_Pao	2237	LTR	BEL-Pao
roo	9092	LTR	BEL-Pao
rooA	7621	LTR	BEL-Pao
rover	7318	LTR	Gypsy
Rt1a	5108	LINE	R1
Rt1b	5171	LINE	R1
RT1c	5443	LINE	R1
S2	1735	DNA	Tc1-Mariner
S-element	1736	DNA	Tc1-Mariner
springer	7546	LTR	Gypsy
Stalker	7256	LTR	Gypsy
Stalker2	7672	LTR	Gypsy
Stalker4	7359	LTR	Gypsy
Tabor	7345	LTR	Gypsy
TAHRE	10463	LINE	I-Jockey
TART-A	13424	LINE	I-Jockey
TART-B	10654	LINE	I-Jockey
TART-C	11124	LINE	I-Jockey
Tc1_DM	1666	DNA	Tc1-Mariner
Tc1-2	1644	DNA	Tc1-Mariner
Tc3	1743	DNA	Tc1-Mariner
Tirant	8526	LTR	Gypsy
Tom	6932	LTR	Gypsy
transib1	2167	DNA	Transib
Transib2	2844	DNA	Transib
transib3	2883	DNA	Transib
transib4	2656	DNA	Transib
Transib5	3001	DNA	Transib
Transpac	5249	LTR	Gypsy
X-element	4740	LINE	I-Jockey
ZAM	8435	LTR	Gypsy
