# Supplementary figures and images for: Rapid evolution of piRNA clusters in the Drosophila melanogaster ovary
Source: HighWire-hosted journal article supplement (doi:10.1101/gr.278062.123), 2024-05-01

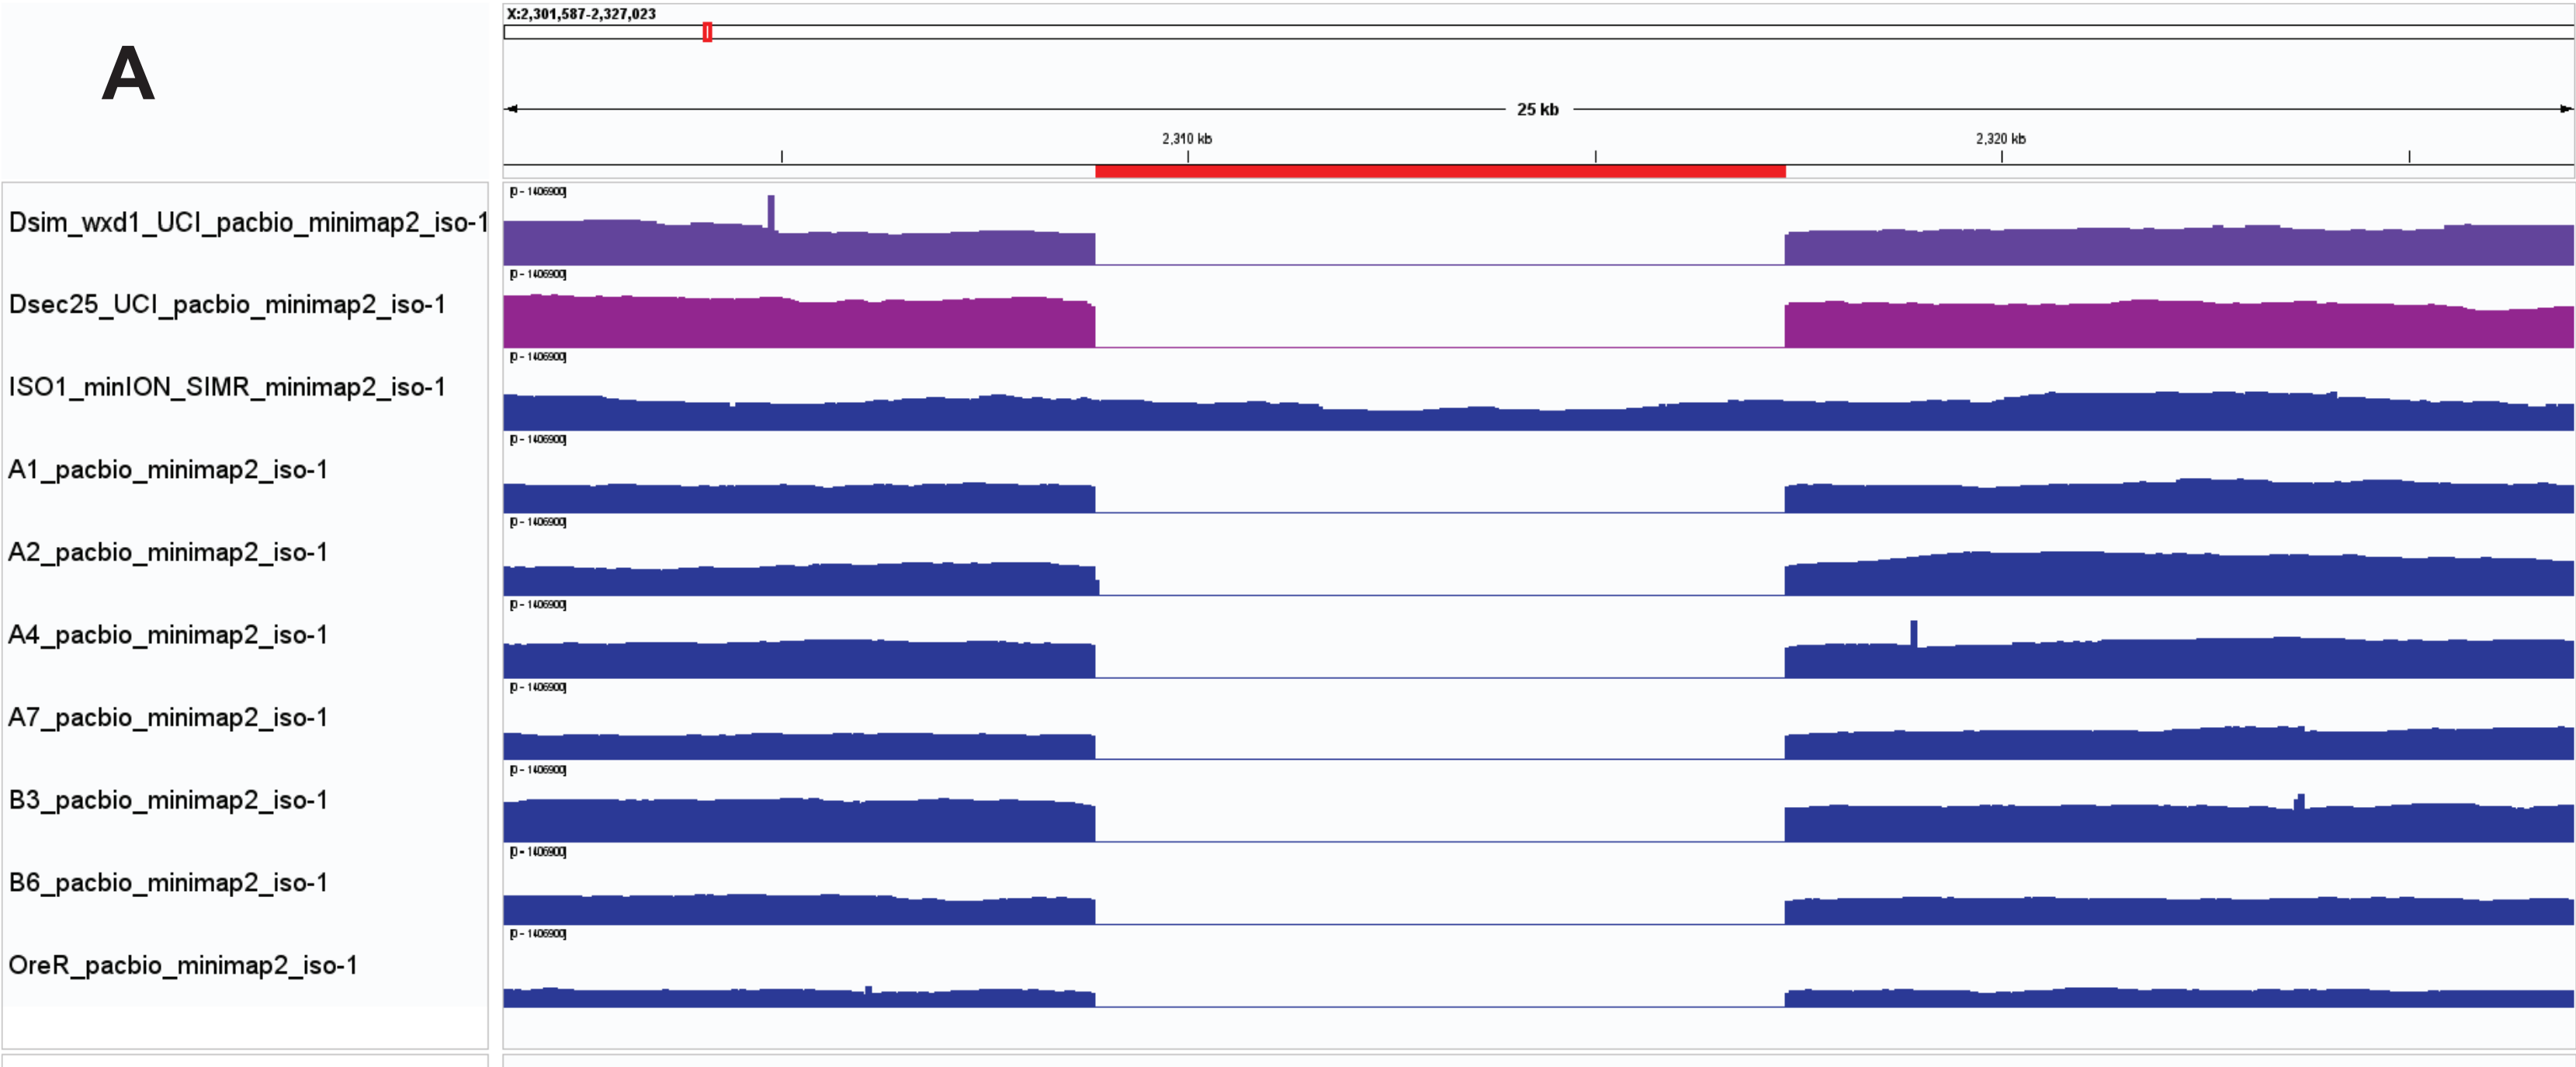

Supplement: Supplemental_Material.zip [file Supplemental_Fig_S10.pdf › Supplemental_Fig_S10.pdf]
